# Supplementary material for: Enantioselective total syntheses of six natural and two proposed meroterpenoids fromPsoralea corylifolia
Source: Royal Society of Chemistry journal article supplement (doi:10.1039/d3sc00582h), 2023-01-01

## Supplementary Information

### **Enantioselective Total Syntheses of Six Natural and Two Proposed Meroterpenoids from *Psoralea Corylifolia***

Xiao-Wei Chen<sup>a</sup>, Zi-Chao Hou<sup>a</sup>, Chi Chen<sup>a</sup>, Ling-Hui Zhang<sup>a</sup>, Meng-En Chen<sup>a</sup> and Fu-Min Zhang<sup>a,b\*</sup>

<sup>a</sup> *State Key Laboratory of Applied Organic Chemistry & College of Chemistry and Chemical Engineering, Lanzhou University, Lanzhou 730000, China.*

<sup>b</sup> *Shanghai Engineering Research Center of Molecular Therapeutics and New Drug Development, School of Chemistry and Molecular Engineering, East China Normal University, Shanghai 200062, China*

*\*Email: zhangfm@lzu.edu.cn*

## Table of contents

|                                                                                                                         |    |
|-------------------------------------------------------------------------------------------------------------------------|----|
| <b>1. General Information</b> .....                                                                                     | 3  |
| <b>2. Synthesis of precursors 2 and 2'</b> .....                                                                        | 4  |
| 2.1 Synthesis of compound 5 .....                                                                                       | 4  |
| 2.2 Synthesis of compound 4 .....                                                                                       | 6  |
| 2.3 Synthesis of compound 3 .....                                                                                       | 9  |
| 2.4 Synthesis of precursors 2 and 2' .....                                                                              | 10 |
| <b>3. Collective total syntheses of 7<math>\alpha</math>-aryl-12<math>\beta</math>-alkyl type meroterpenoids</b> .....  | 18 |
| 3.1 Synthesis of natural (+)-psoracorylifol F ( <b>1a</b> ) .....                                                       | 18 |
| 3.2 Synthesis of <i>pseudo</i> -natural (-)-8 $\alpha$ -hydroxy-psoracorylifol F ( <b>9</b> ) .....                     | 24 |
| 3.3 Synthesis of natural (-)-7 $\alpha$ ,8 $\beta$ -hydroxy-12 $\beta$ -cyclobakuchiol C ( <b>1b</b> ) .....            | 25 |
| 3.4 Synthesis of the proposed corypsoriol J ( <b>1c</b> ) .....                                                         | 28 |
| 3.5 Synthesis of proposed corypsoriol J's derivatives .....                                                             | 32 |
| <b>4. Total syntheses of 7<math>\beta</math>-aryl-12<math>\beta</math>-alkyl type meroterpenoid</b> .....               | 35 |
| 4.1 Synthesis of natural (-)-7 $\beta$ ,8 $\alpha$ -hydroxy-12 $\beta$ -psoracorylifol F ( <b>1d</b> ) .....            | 35 |
| <b>5. Collective total syntheses of 7<math>\beta</math>-aryl-12<math>\alpha</math>-alkyl type meroterpenoids</b> .....  | 41 |
| 5.1 Synthesis of natural (-)-corypsoriol H ( <b>1e</b> ) .....                                                          | 41 |
| 5.2. Synthesis of natural (-)-psoracorylifol G ( <b>1f</b> ) .....                                                      | 48 |
| 5.3 Synthesis of natural (-)-8 $\alpha$ -hydroxy-cyclobakuchiol C ( <b>1g</b> ) .....                                   | 50 |
| 5.4. Synthesis of the proposed corypsoriol I ( <b>1h</b> ) .....                                                        | 54 |
| <b>6. X-Ray crystallography Data</b> .....                                                                              | 58 |
| 6.1 X-Ray crystallography of compound <b>8</b> .....                                                                    | 58 |
| 6.2 X-Ray crystallography of natural (-)-7 $\alpha$ ,8 $\beta$ -hydroxy-12 $\beta$ -cyclobakuchiol C ( <b>1b</b> ) .... | 59 |
| 6.3 X-Ray crystallography of compound <b>11</b> .....                                                                   | 60 |
| 6.4 X-Ray crystallography of compound <b>14</b> .....                                                                   | 61 |
| 6.5 X-Ray crystallography of compound <b>14'</b> .....                                                                  | 62 |
| 6.6 X-Ray crystallography of natural (-)-corypsoriol H ( <b>1e</b> ) .....                                              | 63 |
| 6.7 X-Ray crystallography of proposed corypsoriol I ( <b>1h</b> ) .....                                                 | 64 |
| <b>7. References</b> .....                                                                                              | 65 |
| <b>8. Copies of <sup>1</sup>H and <sup>13</sup>C NMR spectra UPC<sup>2</sup> data of products</b> .....                 | 65 |

## 1. General Information

All moisture- or oxygen-sensitive reactions were carried out under an argon atmosphere in oven flasks. The solvents were purified by distillation over the drying agents indicated and were transferred under argon: toluene, THF and Et<sub>2</sub>O from Na; MeOH from Mg and I<sub>2</sub>; CH<sub>2</sub>Cl<sub>2</sub>, Et<sub>3</sub>N and DMF from CaH<sub>2</sub>. All reactions were monitored by thin-layer chromatography (TLC) on silica gel GF<sub>254</sub> plates using UV light as visualizing agent (if applicable), and a solution of phosphomolybdic acid (50 g/L) in EtOH followed by heating as developing agents. The products were purified by flash column chromatography on silica gel (200-300 meshes) from the Qingdao Marine Chemical Company (China).

**<sup>1</sup>H NMR** and **<sup>13</sup>C NMR** spectra were recorded in CDCl<sub>3</sub>, (CD<sub>3</sub>)<sub>2</sub>CO or CD<sub>3</sub>OD solution on a Bruker AM 400 MHz instrument or 600 MHz NMR instrument. Chemical shifts were denoted in ppm ( $\delta$ ), and calibrated by using residual undeuterated solvent (CDCl<sub>3</sub> (7.26 ppm), (CD<sub>3</sub>)<sub>2</sub>CO (2.05 ppm), CD<sub>3</sub>OD (3.31 ppm) or tetramethylsilane (0.00 ppm)) as internal reference for **<sup>1</sup>H NMR** and the deuterated solvent (CDCl<sub>3</sub> (77.00 ppm), (CD<sub>3</sub>)<sub>2</sub>CO (29.84 ppm), CD<sub>3</sub>OD (49.00 ppm) or tetramethylsilane (0.00 ppm)) as internal standard for **<sup>13</sup>C NMR**. The following abbreviations were used to explain the multiplicities: s = singlet, d = doublet, t = triplet, q = quartet, br = broad, dd = double doublet, td = triple doublet, dt = double triplet, m = multiplet.

The high-resolution mass spectral analysis (**HRMS**) data were measured on Thermo Fisher Orbitrap Elite Mass Spectrometer or a LCT Premier XE (Waters) mass spectrometer (Waters, Milford, MA, U.S.) by means of the ESI technique.

Electron ionization mass spectra (**EI-MS**) were measured on a Shimadzu GCMSQP2010SE spectrometer by direct inlet at 70 eV and the corresponding signals were given in m/z with relative intensity (%) in brackets.

**Melting points** (m.p.) were measured on a Kolfer melting point apparatus without calibration (Beijing Tech Instrument Co., LTD).

The **IR** spectra were recorded on Nicolet Nexus 670 FT-IR spectrometer.

The **X-ray** single-crystal determination was performed on an Agilent Super Nova single crystal X-ray diffractometer.

**Optical rotations** were detected on RUDOLPH A21202-J APTV/GW.

The **enantiomeric excesses** (ee) value of the products was determined by Ultra Performance Convergence Chromatography (UPC<sup>2</sup>) equipped with Waters 2998 Photodiode Array Detector instruments.

## 2. Synthesis of precursors 2 and 2'

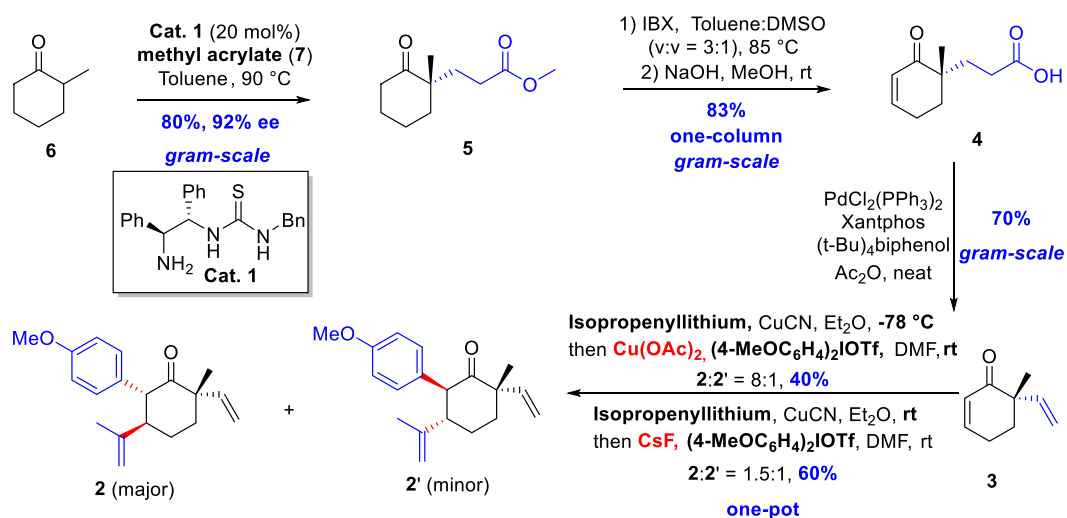

**Scheme S1** Synthesis of precursors **2** and **2'**.

### 2.1 Synthesis of compound $\delta$ -keto ester **5**

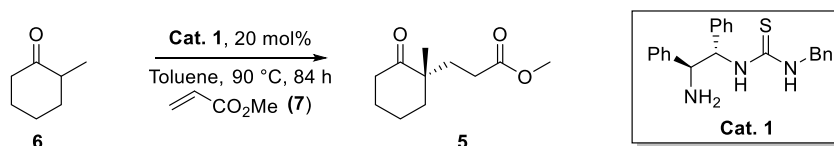

Compound  $\delta$ -keto ester **5** was prepared according to the literature by a modified procedure<sup>1</sup>. To a solution of **Cat. 1** (6.0 mmol, 20.0 mol %) in toluene (20.0 mL) were added the 2-methylcyclohexanone (**6**) (3.64 mL, 30.0 mmol) and methyl acrylate (**7**) (5.40 mL, 60.0 mmol, 2.0 equiv.) at room temperature, and the resulting mixture was stirred at 90 °C. After 84 h, the residue was purified by chromatography on silica gel, eluting with 10-60% Et<sub>2</sub>O/pentane to give the Michael product  $\delta$ -keto ester **5** as a colorless oil (4.75 g, 80% yield, 92% ee. R<sub>f</sub> = 0.4 (10% Et<sub>2</sub>O in pentane)).

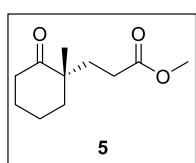

**Compound 5:** Colorless oil;  $[\alpha]_D^{25} = -32.0$  (c = 3.0 in EtOH).

**<sup>1</sup>H NMR** (400 MHz, CDCl<sub>3</sub>)  $\delta$ : 3.59 (s, 3H), 2.34-2.29 (m, 2H), 2.27-2.21 (m, 1H), 2.13-2.05 (m, 1H), 2.01-1.93 (m, 1H), 1.80-1.65 (m, 6H), 1.56-1.51 (m, 1H), 1.00 (s, 3H); **<sup>13</sup>C NMR** (100 MHz, CDCl<sub>3</sub>)  $\delta$ : 214.8,

173.7, 51.3, 47.6, 38.9, 38.4, 32.2, 28.7, 27.1, 22.1, 20.7. **HRMS** (ESI) m/z found 221.1449, calculated for C<sub>11</sub>H<sub>16</sub>O<sub>3</sub>Na [M+Na]<sup>+</sup> 221.1448. **MS** (EI) m/z (%): 198 (9), 154 (36), 96 (52), 83 (54), 69 (62), 112 (98), 55 (100). **IR** (KBr plate)  $\nu_{\text{max}}$ : 2937, 2866, 1739, 1705, 1437, 1377, 1306, 1257, 1172, 1123, 1097 cm<sup>-1</sup>. **Enantiomeric excess** was determined by **UPC<sup>2</sup>** (CHIRALPAK<sup>®</sup> IC-3 column, CO<sub>2</sub>/Methanol = 97/3, flow rate: 2 mL/min, 40 °C,  $\lambda = 297.3$



nm), 92% ee,  $t_R = 2.177$  min (minor), 2.312 min (major).

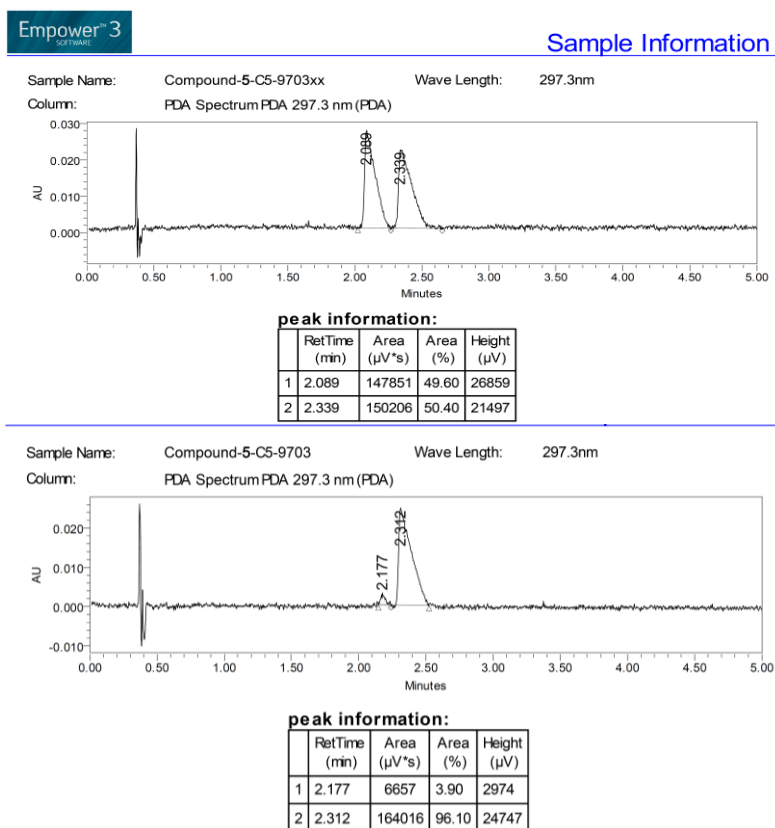

### 2.2.1 Synthesis of chiral thiourea catalyst 1 (Cat. 1)

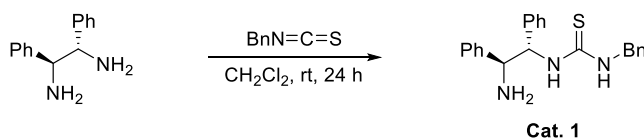

Catalyst **1** (**Cat. 1**) were synthesized according to the literature procedures.<sup>2</sup> An isothiocyanate (2.12 g, 10.0 mmol) was dropped to a solution of an ethylenediamine (1.33 mL, 10.0 mmol) in  $CH_2Cl_2$  (20.0 mL), and the mixture was stirred at room temperature for 24 h. When the starting material disappears (monitored by TLC), the solvent was removed under reduced pressure, the residue was purified by column chromatography to afford the thiourea catalysts **1** (**Cat. 1**) as white solid (2.89 g, 80% yield.  $R_f = 0.4$  (10% MeOH in DCM)).

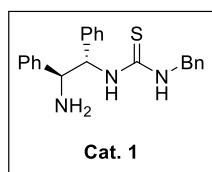

**Catalyst 1** (**Cat. 1**): White solid;  $[\alpha]_D^{26} = -71.8$  ( $c = 1.0$  in  $CHCl_3$ ),  $[\text{lit}^2, [\alpha]_D^{24} = -74.3$  ( $c = 1.0$  in  $CHCl_3$ ); **m.p.**: 66-68 °C.

**$^1H$  NMR** (600 MHz,  $CDCl_3$ )  $\delta$ : 7.43 (brs, 1H), 7.29-7.22 (m, 11H), 7.13 (brs, 4H), 6.50 (brs, 1H), 5.11 (brs, 1H), 4.60 (brs, 1H), 4.52-4.94 (m, 1H), 4.29 (brs, 1H), 1.57 (brs, 2H);  **$^{13}C$  NMR** (150 MHz,  $CDCl_3$ )  $\delta$ : 181.8, 141.7, 139.6, 137.1, 128.8, 128.7, 128.6, 127.7, 127.6, 127.4, 126.6, 63.9, 60.2, 48.4. **MS** (EI)  $m/z$  (%):

361 (0.1), 327 (4), 256 (15), 194 (3), 165 (7), 106 (100), 91 (31), 79 (12). IR (KBr plate)  $\nu_{\text{max}}$ : 3268, 3061, 3029, 2964, 1538, 1495, 1453, 1347, 1287, 1262, 1076, 1028, 799, 757, 699  $\text{cm}^{-1}$ .

## 2.2 Synthesis of compound 4

### Method I:

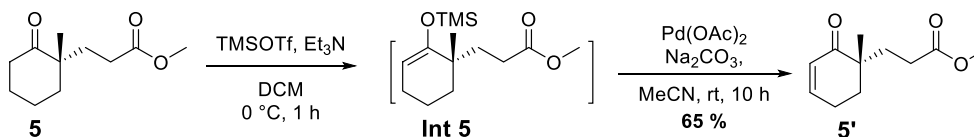

To a stirred solution of  $\delta$ -keto ester **5** (39.6 mg, 0.2 mmol) in dichloromethane (2 mL) was added freshly distilled Et<sub>3</sub>N (41.7  $\mu\text{L}$ , 0.3 mmol) and TMSOTf (36.3  $\mu\text{L}$ , 0.2 mmol) at 0 °C and was stirred at the same temperature for 1 h. The reaction was quenched by addition of saturated aqueous NaHCO<sub>3</sub> and the aqueous phase was extracted with diethyl ether (3  $\times$  20 mL). The combined organic extracts were washed with brine, dried over anhydrous Na<sub>2</sub>SO<sub>4</sub>, and concentrated to give **Int 5** as a yellow oil.

To a stirred solution of the crude product **Int 5** in anhydrous CH<sub>3</sub>CN (2 mL) was added Na<sub>2</sub>CO<sub>3</sub> (63.6 mg, 0.6 mmol) and Pd(OAc)<sub>2</sub> (48.5 mg, 0.2 mmol). The resulting mixture was stirred at the room temperature for 10 hours, treated with Et<sub>3</sub>N (0.31 mL, 2.40 mmol) and then concentrated. The residue was purified by column chromatography to afford **5'** as a yellow oil (25.5 mg, 65%). R<sub>f</sub> = 0.4 (silica gel, petroleum ether: ethyl acetate = 5:1).

### Method II:

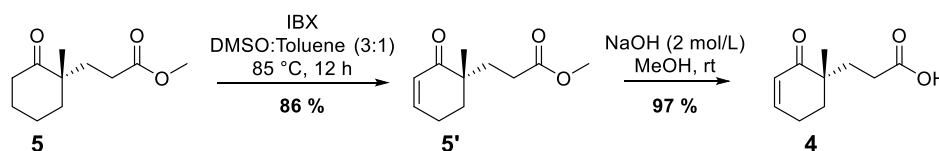

To a stirred solution of **5** (6.6 g, 31.0 mmol) in DMSO:toluene (3:1/v:v) was added IBX (26.1 g, 93.3 mmol), and the mixture was stirred at 85 °C.<sup>3</sup> After the starting material disappears (monitored by TLC), aqueous saturated NaHCO<sub>3</sub> (300 mL) and diethyl ether (300 mL) were added to the reaction mixture at room temperature, which was filtered through a Celite pad. The organic layer was separated and the aqueous layer was extracted with diethyl ether (3 $\times$ 100 mL). The combined organic phase was washed with brine, dried over anhydrous Na<sub>2</sub>SO<sub>4</sub>, filtered, and concentrated under reduced pressure to give a residue **5'** as a yellow oil. The crude product **5'** was used for next step without purification.

To a solution of the crude product **5'** (5.22 g, 26.6 mmol) in MeOH (11.0 mL) was added aqueous 2.0 mol/L NaOH (26.6 mL, 53.2 mmol, 2.0 equiv.). The reaction mixture was

stirred at room temperature. When the starting material disappears (monitored by TLC), MeOH was evaporated under reduced pressure. The aqueous layer was washed with Et<sub>2</sub>O (1×100 mL), the pH value of the aqueous layer was adjusted to pH = 4 using HCl (1.0 mol/L) before being extracted with ethyl acetate (3×100 mL). The combined extracts were washed with brine, dried over Na<sub>2</sub>SO<sub>4</sub>, filtered, and concentrated *in vacuo*. The crude product was purified by flash column chromatography to afford carboxylic acid **4** as a yellow oil (4.68 g, 83% yield from **5**, two steps.). R<sub>f</sub> = 0.2 (25% ethyl acetate-petroleum ether).

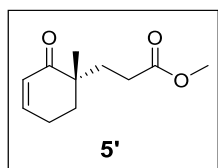

**Compound 5'**: Light yellow oil;  $[\alpha]_D^{25} = 2.1$  (c = 0.5 in MeOH).

**<sup>1</sup>H NMR** (400 MHz, CDCl<sub>3</sub>) δ: 6.89 (dt, *J* = 10.0, 4.0 Hz, 1H), 5.91 (dt, *J* = 10.0, 2.0 Hz, 1H), 3.66 (s, 3H), 2.45-2.34 (m, 2H), 2.31-2.21 (m, 2H), 1.95-1.77 (m, 4H), 1.10 (s, 3H); **<sup>13</sup>C NMR** (100 MHz, CDCl<sub>3</sub>) δ:

202.9, 173.7, 148.4, 128.1, 51.3, 43.6, 33.3, 31.0, 28.8, 22.8, 21.4. **HRMS** (ESI) *m/z* found 219.0990, calculated for C<sub>11</sub>H<sub>16</sub>O<sub>3</sub>Na [M+Na]<sup>+</sup> 219.0992. **MS** (EI) *m/z* (%): 196 (75), 191 (60), 180 (37), 165(40), 137 (92), 105 (70), 106 (54). **IR** (KBr plate)  $\nu_{\max}$ : 2953, 2931, 2873, 1738, 1674, 1436, 1382, 1200, 1174 cm<sup>-1</sup>. **Enantiomeric excess** was determined by **UPC<sup>2</sup>** (CHIRALPAK<sup>®</sup> IC-3 column, CO<sub>2</sub>/Methanol = 95/5, flow rate: 2 mL/min, 40 °C, λ = 220.0 nm), 92% ee, t<sub>R</sub> = 2.445 min (major), 3.775 min (minor).

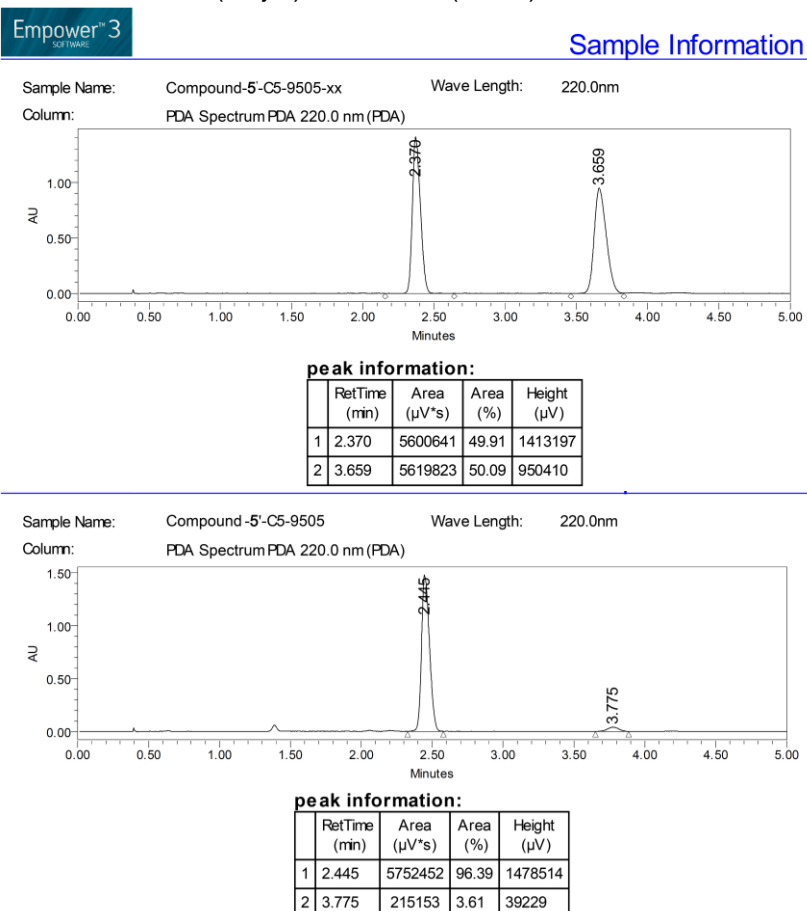

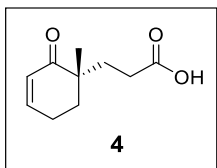

**Compound 4:** Yellow oil;  $[\alpha]_D^{25} = -0.9$  (c = 0.5 in MeOH).

**$^1\text{H NMR}$**  (400 MHz,  $\text{CDCl}_3$ )  $\delta$ : 11.18 (brs, 1H), 6.87 (dt,  $J = 10.0, 4.0$  Hz, 1H), 5.91 (dt,  $J = 10.4, 1.6$  Hz, 1H), 2.40-2.26 (m, 4H), 1.92-1.76 (m, 4H), 1.09 (s, 3H);  **$^{13}\text{C NMR}$**  (100 MHz,  $\text{CDCl}_3$ )  $\delta$ : 203.4, 179.6,

148.8, 128.4, 43.8, 33.6, 31.1, 29.1, 23.0, 21.6. **HRMS** (ESI)  $m/z$  found 205.0835, calculated for  $\text{C}_{18}\text{H}_{24}\text{O}_2\text{Na}$   $[\text{M}+\text{Na}]^+$  205.0832. **MS** (EI)  $m/z$  (%): 182 (53), 164 (23), 148(75), 138 (42), 110 (100), 101 (58). **IR** (KBr plate)  $\nu_{\text{max}}$ : 3433, 2961, 2928, 2872, 1710, 1672, 1454, 1389, 1284, 1225, 1077  $\text{cm}^{-1}$ . **Enantiomeric excess** was determined by **UPC<sup>2</sup>** (CHIRALPAK<sup>®</sup> IC-3 column,  $\text{CO}_2/\text{Methanol} = 90/10$ , flow rate: 2 mL/min, 40 °C,  $\lambda = 210.0$  nm), 94% ee,  $t_R = 1.637$  min (major), 1.871 min (minor).

Empower<sup>®</sup> 3  
SOFTWARE

## Sample Information

Sample Name: Compound-4-C5-9010xx      Wave Length: 210.0nm  
Column: PDA Spectrum PDA 210.0 nm (PDA)

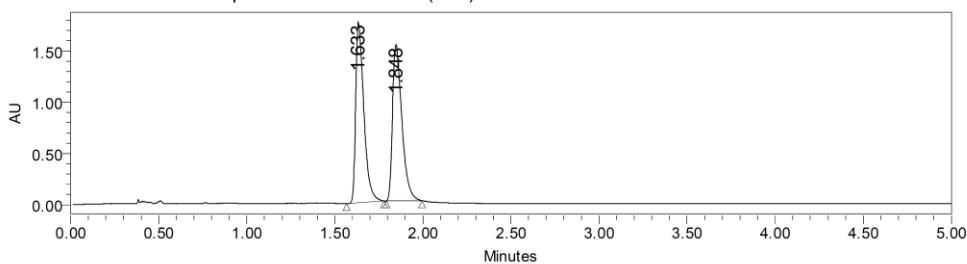

### peak information:

|   | RetTime (min) | Area ( $\mu\text{V}\cdot\text{s}$ ) | Area (%) | Height ( $\mu\text{V}$ ) |
|---|---------------|-------------------------------------|----------|--------------------------|
| 1 | 1.633         | 5653674                             | 50.09    | 1767231                  |
| 2 | 1.848         | 5633489                             | 49.91    | 1528376                  |

Sample Name: Compound-4-C5-9010      Wave Length: 210.0nm  
Column: PDA Spectrum PDA 210.0 nm (PDA)

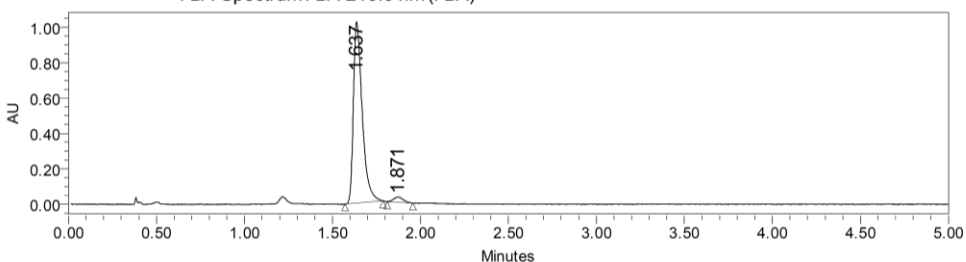

### peak information:

|   | RetTime (min) | Area ( $\mu\text{V}\cdot\text{s}$ ) | Area (%) | Height ( $\mu\text{V}$ ) |
|---|---------------|-------------------------------------|----------|--------------------------|
| 1 | 1.637         | 3569507                             | 97.05    | 1025589                  |
| 2 | 1.871         | 108487                              | 2.95     | 29459                    |

## 2.3 Synthesis of compound 3

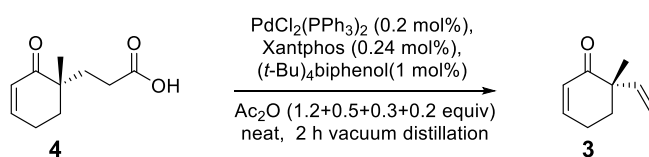

Compound **3** was synthesized following the literature procedure.<sup>4</sup> A flame-dried 25.0 mL round-bottom flask, PdCl<sub>2</sub>(PPh<sub>3</sub>)<sub>2</sub> (15.4 mg, 0.022 mmol, 2% equiv.), Xantphos (15.0 mg, 0.026 mmol, 2.4% equiv.), (*t*-Bu)<sub>4</sub>biphenol (45.2 mg, 0.11 mmol, 0.01 equiv.) and carboxylic acid **4** (2.0 g, 11.0 mmol, 1.0 equiv.) were added under the argon atmosphere. The flask was equipped with a distillation head and a 10 mL round-bottom receiving flask. The system was evacuated and backfilled with argon three times, and the first portion of acetic anhydride (6.0 mmol, 1.2 equiv.) was added *via* syringe through the septum that seals the top of the distillation head. The flask was immersed in a pre-heated 60 °C oil bath and rapidly heated to 130 °C. When the oil bath temperature reached 120 °C, switched to vacuum to allow distillation of resultant acetic acid and trace product into a receiving flask, which was cooled to -78 °C. When the oil bath temperature reached 130 °C. The system a vacuum was drawn and the mixture was stirred for approximate 30 min at 130 °C. The system was backfilled with argon atmosphere, and the second portion of acetic anhydride (2.5 mmol, 0.5 equiv.) was added *via* syringe. The system was then gradually resubjected to a vacuum. Acetic anhydride was added as follows (0.3, 0.2 equiv.) in the same manner every 30 min. The reaction was stopped about 2 h and allowed to cool to the room temperature under the argon atmosphere. The distillate was added to a saturated aqueous solution of NaHCO<sub>3</sub>, stirred for 30 min, and the biphasic mixture and residual dark red reaction mixtures were extracted with CH<sub>2</sub>Cl<sub>2</sub> (3×20 mL). The combined extracts were washed with brine, dried over Na<sub>2</sub>SO<sub>4</sub>. The solvents were evaporated and the residue was purified by flash column chromatography on silica gel to afford vinyl ketone **3** (1.05 g, 70% yield) as a colorless oil. (*R*<sub>f</sub> = 0.5, 16% Et<sub>2</sub>O in pentane).

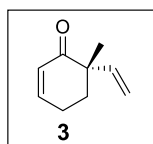

**Compound 3:** Colorless oil;  $[\alpha]_D^{26} = -71.8$  (*c* = 1.0 in CHCl<sub>3</sub>).

**<sup>1</sup>H NMR** (400 MHz, CDCl<sub>3</sub>)  $\delta$ : 6.93-6.88 (m, 1H), 5.97 (dt, *J* = 10.0, 2.0 Hz, 1H), 5.93 (dd, *J* = 17.6, 10.8 Hz, 1H), 5.05 (dd, *J* = 10.8, 0.4 Hz, 1H), 5.00 (dd, *J* = 17.6, 0.4 Hz, 1H), 2.44-2.31 (m, 2H), 2.03-1.97 (m, 1H), 1.93-1.86

(m, 1H), 1.20 (s, 3H); **<sup>13</sup>C NMR** (100 MHz, CDCl<sub>3</sub>)  $\delta$ : 201.4, 149.1, 140.3, 128.5, 114.0, 47.9, 34.5, 23.3, 22.6. **HRMS** (ESI) *m/z* found 137.0962, calculated for C<sub>11</sub>H<sub>17</sub>O<sub>3</sub> [M+H]<sup>+</sup> 137.0961. **MS** (EI) *m/z* (%): 136 (72), 128 (39), 120 (34), 107 (60). **IR** (KBr plate)  $\nu_{\text{max}}$ : 2958, 2925, 2854, 1730, 1515, 1469, 1337, 1289, 1068, 749 cm<sup>-1</sup>. **Enantiomeric excess**

was determined by **UPC<sup>2</sup>** (CHIRALPAK<sup>®</sup> IG-3 column, CO<sub>2</sub>/Methanol = 99/1, flow rate: 2 mL/min, 40 °C, λ = 238.0 nm), 94% ee, t<sub>R</sub> = 1.552 min (major), 1.719 min (minor).

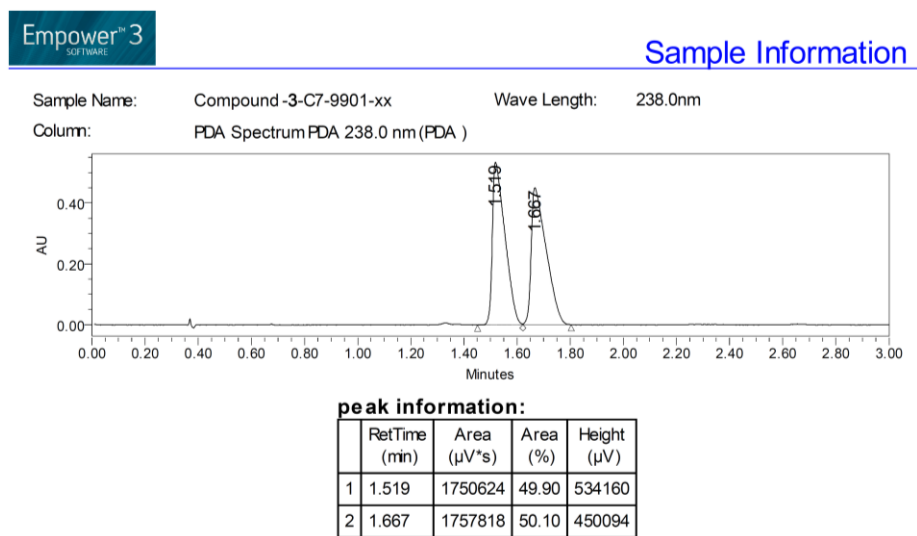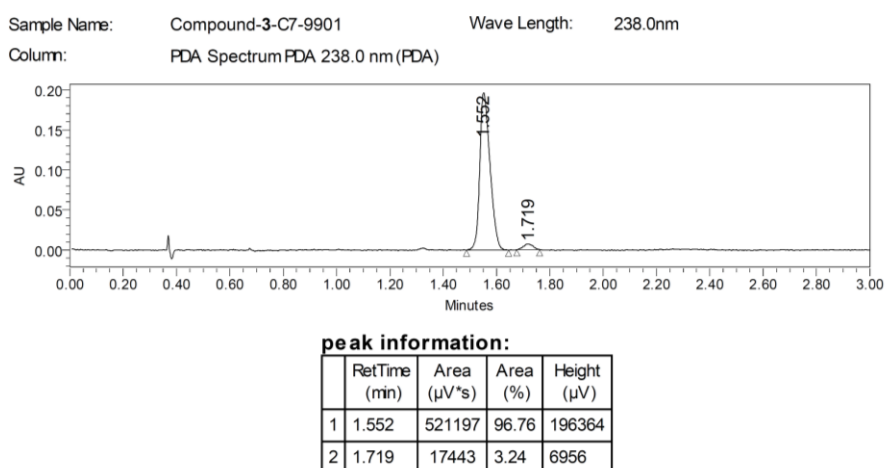

## 2.4 Synthesis of precursors 2 and 2'

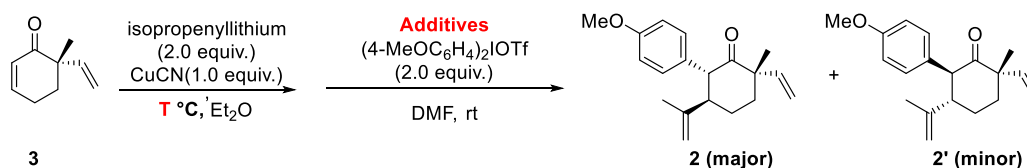

### Method I:

According to the literature<sup>5</sup>, to a stirred suspension of CuCN (89.6 mg, 1.0 mmol, 1.0 equiv.) in Et<sub>2</sub>O (15 mL) was slowly added via syringe a solution of isopropenyllithium (5.0 mL, 0.4 M in Et<sub>2</sub>O, 2.0 equiv.) at -78 °C under an argon atmosphere. The mixture was stirred for approximate 30 min at -78 °C until a homogeneous solution was observed, and enone **3** (136.0 mg, 1.0 mmol) was then added at **-78 °C**. After the starting material disappeared, the reaction mixture was allowed to warm to -20 °C, diluted with dry DMF (10.0 mL),

Cu(OAc)<sub>2</sub> (181.6 mg, 1.0 mmol, 1.0 equiv.) and the diaryliodonium triflate (4-MeOC<sub>6</sub>H<sub>4</sub>)<sub>2</sub>IOTf (1.024 g, 2.0 mmol, 2.0 equiv.) was sequentially added. The reaction mixture was stirred for 12 h at -20 °C, and quenched with a saturated aqueous solution of NH<sub>4</sub>Cl. The mixture was extracted with ethyl acetate (3×30 mL) and the combined organic layers were washed with water and brine, dried over Na<sub>2</sub>SO<sub>4</sub>, filtered, and concentrated under vacuum. The resultant crude products (dr~8:1) were purified by flash column chromatography to give the desired product **2** (101.0 mg, 35.6% yield) and its isomer **2'** (12.5 mg, 4.4% yield). (R<sub>f</sub> = 0.50 and 0.51, respectively, 10% ethyl acetate-petroleum ether).

#### **Method II:**

According to the literature<sup>5</sup>, to a stirred suspension of CuCN (89.6 mg, 1.0 mmol, 1.0 equiv.) in Et<sub>2</sub>O (15.0 mL) was slowly added *via* syringe a solution of isopropenyllithium (5.0 mL, 0.4 M in Et<sub>2</sub>O, 2.0 equiv.) at -78 °C under an argon atmosphere. The mixture was stirred for approximate 30 min at -78 °C until a homogeneous solution was observed. After the reaction mixture was allowed to warm to room temperature, and enone **3** (136.0 mg, 1.0 mmol) was then added at room temperature. After the starting material disappeared, **CsF** (608.0 mg, 4.0 mmol, 4.0 equiv.) was added and the reaction mixture was stirred for 10 minutes. Subsequently, diaryliodonium triflate (4-MeOC<sub>6</sub>H<sub>4</sub>)<sub>2</sub>IOTf (1.024 g, 2.0 mmol, 2.0 equiv.) in anhydrous DMF (6.5 mL) was added *via* syringe. The reaction mixture was stirred for 24 h at room temperature, and quenched with a saturated aqueous solution of NH<sub>4</sub>Cl. The mixture was extracted with ethyl acetate (3×30 mL) and the combined organic layers were washed with water and brine, dried over Na<sub>2</sub>SO<sub>4</sub>, filtered, and concentrated under vacuum. The resultant crude products (dr = 1.5:1) were purified by flash column chromatography to give the product **2** (102.0 mg, 35.9% yield) and its isomer **2'** (68.4 mg, 24.1% yield). (R<sub>f</sub> = 0.50 and 0.51, respectively, 10% ethyl acetate-petroleum ether).

(4-MeOC<sub>6</sub>H<sub>4</sub>)<sub>2</sub>IOTf were prepared according to the reported procedures.<sup>6</sup>

**Isopropenyllithium** was prepared according to the following manner<sup>7</sup>: To a precooled (-78 °C) solution of 2-bromopropene (281.7 μL, 3.2 mmol) in dry Et<sub>2</sub>O (2.8 mL) was added dropwise *tert*-butyllithium (4.92 mL, 1.3 M in pentane, 6.4 mmol). The resulting solution was stirred at -78 °C for 30 min, and then used immediately.

#### **2.4.1 The Optimization of the Cu-mediated one-pot Michael addition/arylation reaction**

Unless otherwise noted, the reaction was performed according to the Method I and Method II, and the details were listed in Table S1-S4

### 2.4.1.1 The screening of additives

Table S1. The screening of additives<sup>a</sup>

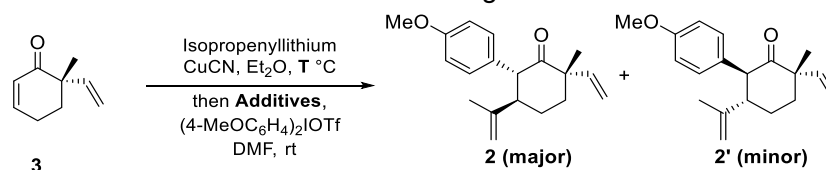

| Entry     | Temp.         | Additives (equiv.)                      | dr ( <b>2:2'</b> ) | Yield <sup>b</sup> |
|-----------|---------------|-----------------------------------------|--------------------|--------------------|
| 1         | -78 °C        | CuCl (1.0)                              | --                 | 25%                |
| 2         | -78 °C        | CuI (1.0)                               | --                 | 20%                |
| 3         | -78 °C        | CuOAc (1.0)                             | --                 | 32%                |
| 4         | -78 °C        | Cu(OTf) <sub>2</sub> (1.0)              | --                 | 34%                |
| <b>5</b>  | <b>-78 °C</b> | <b>Cu(OAc)<sub>2</sub> (1.0)</b>        | <b>8:1</b>         | <b>40%</b>         |
| 6         | -78 °C        | Cu(OAc) <sub>2</sub> (1.0)              | 8:1                | 32%                |
| 7         | rt            | Cu(OAc) <sub>2</sub> (1.0)              | 1.4:1              | 35%                |
| 8         | 40 °C         | Cu(OAc) <sub>2</sub> (1.0)              | 1.7:1              | 20%                |
| 9         | -78 °C to rt  | LiHMDS (2.0)                            | 4:1                | 44%                |
| 10        | -78 °C to rt  | LiCA (2.0)                              | 2:1                | 38%                |
| 11        | -78 °C to rt  | Cs <sub>2</sub> CO <sub>3</sub> (2.0)   | 1.8:1              | 25%                |
| 12        | -78 °C to rt  | CsOH·H <sub>2</sub> O (2.0)             | 1.7:1              | 20%                |
| 13        | -78 °C to rt  | NaH (2.0)                               | --                 | ND                 |
| 14        | -78 °C to rt  | DBU (2.0)                               | --                 | trace              |
| 15        | -78 °C to rt  | Na <sub>2</sub> CO <sub>3</sub> (2.0)   | --                 | trace              |
| 16        | -78 °C to rt  | DMAP (2.0)                              | --                 | NR                 |
| 17        | -78 °C to rt  | DIPEA (2.0)                             | --                 | NR                 |
| 18        | -78 °C to rt  | HMPA (5.0), Cu(OAc) <sub>2</sub> (1.0)  | --                 | 21%                |
| 19        | -78 °C to rt  | TMEDA (5.0), Cu(OAc) <sub>2</sub> (1.0) | --                 | 25%                |
| 20        | -78 °C to rt  | CsF (2.0)                               | 3:1                | 50%                |
| 21        | rt            | CsF (2.0)                               | 1.51:1             | 50%                |
| 22        | rt            | CsF (3.0)                               | 1.51:1             | 53%                |
| <b>23</b> | <b>rt</b>     | <b>CsF (4.0)</b>                        | <b>1.49:1</b>      | <b>60.0%</b>       |
| 24        | rt            | CsF (5.0)                               | 1.49:1             | 59.6%              |

<sup>a</sup>Reaction was performed using isopropenyllithium (0.2 mmol) and CuCN (0.1 mmol) in 1.5 mL Et<sub>2</sub>O at -78 °C and stirred for 30 min; then enone **3** (0.1 mmol) was added to the reaction mixture. After the starting material (**3**) disappeared, additives and (4-MeOC<sub>6</sub>H<sub>4</sub>)<sub>2</sub>lOTf (0.2 mmol) in DMF was added to the reaction mixture at the note temperature. <sup>b</sup>Isolated yield; rt = Room temperature; DMF = *N,N*-dimethylformamide; LiCA = Lithium cyclohexylisopropylamide; HMPA = Hexamethylphosphoramide; DMAP = 4-dimethylaminopyridine; DBU = 1,8-diazabicyclo[5.4.0]undec-7-ene; DIPEA = *N,N*-diisopropylethylamine; TMEDA = *N,N,N',N'*-tetramethylethylenediamine.



### 2.4.1.2 The screening of diaryliodonium salts

Table S2. The screening of diaryliodonium salts<sup>a</sup>

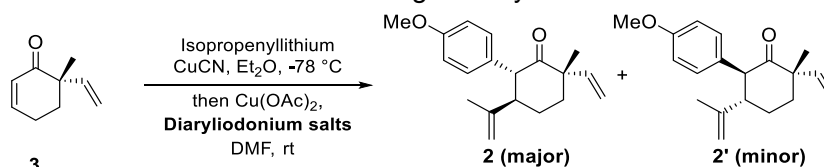

| Entry    | Diaryliodonium salts                                                | dr ( <b>2:2'</b> ) | Yield <sup>b</sup> |
|----------|---------------------------------------------------------------------|--------------------|--------------------|
| <b>1</b> | <b>(4-MeOC<sub>6</sub>H<sub>4</sub>)<sub>2</sub>IOTf</b>            | <b>8:1</b>         | <b>40%</b>         |
| 2        | (4-MeOC <sub>6</sub> H <sub>4</sub> ) <sub>2</sub> IBF <sub>4</sub> | 4.8:1              | 27%                |
| 3        | (4-MeOC <sub>6</sub> H <sub>4</sub> ) <sub>2</sub> IOTs             | 8:1                | 10%                |
| 4        | (4-MeOC <sub>6</sub> H <sub>4</sub> ) <sub>2</sub> IBF <sub>6</sub> | 8:1                | 30%                |

<sup>a</sup>Reaction was performed using isopropenyllithium (0.2 mmol) and CuCN (0.1 mmol) in 1.5 mL Et<sub>2</sub>O at -78 °C and stirred for 30 min, then enone **3** (0.1 mmol) was added to the reaction mixture, after the starting material (**3**) disappeared. Then Cu(OAc)<sub>2</sub> (0.1 mmol) and diaryliodonium salts (0.2 mmol) in DMF was added to the reaction mixture at rt. <sup>b</sup>Isolated yield; rt = Room temperature; DMF = *N,N*-Dimethylformamide.

### 2.4.1.3 The screening of chiral ligands

Table S3. The screening of chiral ligands<sup>a</sup>

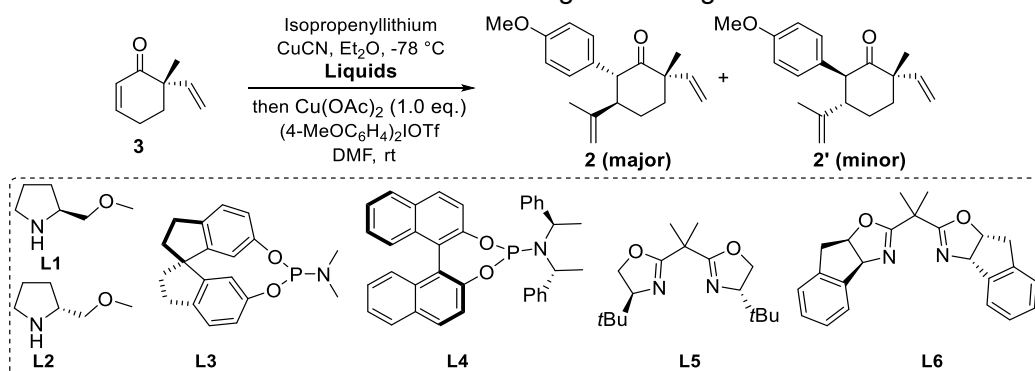

| Entry | Liquids   | Additives (equiv.)         | dr ( <b>2:2'</b> ) | Yield <sup>b</sup> |
|-------|-----------|----------------------------|--------------------|--------------------|
| 1     | <b>L1</b> | Cu(OAc) <sub>2</sub> (1.0) | 2.9:1              | 11.7%              |
| 2     | <b>L2</b> | Cu(OAc) <sub>2</sub> (1.0) | 3:1                | 10.5%              |
| 3     | <b>L3</b> | Cu(OAc) <sub>2</sub> (1.0) | --                 | trace              |
| 4     | <b>L4</b> | Cu(OAc) <sub>2</sub> (1.0) | --                 | trace              |
| 5     | <b>L5</b> | Cu(OAc) <sub>2</sub> (1.0) | --                 | trace              |
| 6     | <b>L6</b> | Cu(OAc) <sub>2</sub> (1.0) | --                 | trace              |
| 7     | <b>L1</b> | CsF (4.0)                  | 4.5:1              | 31.7%              |
| 8     | <b>L2</b> | CsF (4.0)                  | 3:1                | 28.7%              |
| 9     | <b>L3</b> | CsF (4.0)                  | --                 | trace              |
| 10    | <b>L4</b> | CsF (4.0)                  | --                 | trace              |
| 11    | <b>L5</b> | CsF (4.0)                  | --                 | trace              |
| 12    | <b>L6</b> | CsF (4.0)                  | --                 | trace              |

<sup>a</sup>Reaction was performed using isopropenyllithium (0.2 mmol) and CuCN (0.1 mmol) in 1.5 mL Et<sub>2</sub>O at -78 °C and stirred for 30 min; then chiral ligand (**L**) was added to the reaction mixture and stirred for 1 h; enone **3** (0.1 mmol) was added. After the starting material (**3**) disappeared, Cu(OAc)<sub>2</sub> (0.1 mmol) and (4-MeOC<sub>6</sub>H<sub>4</sub>)<sub>2</sub>IOTf (0.2 mmol) in DMF was added to the reaction mixture; <sup>b</sup>Isolated yield; rt = Room temperature; DMF = *N,N*-Dimethylformamide.

#### 2.4.1.4 The screening of organmetallic reagents

##### 1) IsopropenylMgBr:

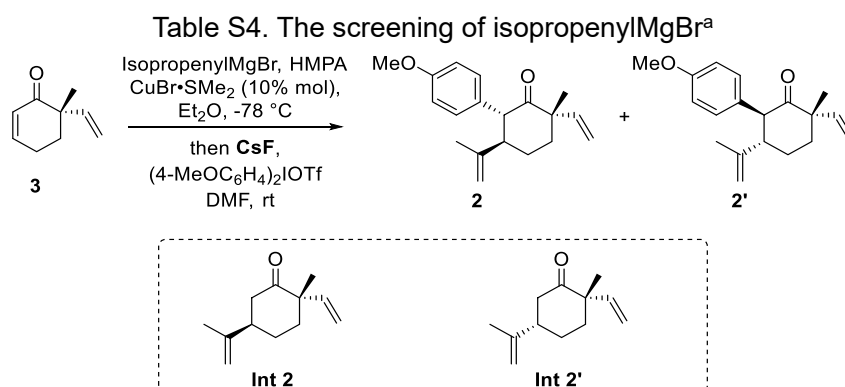

| Entry | Solvent           | Additives (equiv.)                      | dr ( <b>2:2'</b> ) | Yield <sup>b</sup> |
|-------|-------------------|-----------------------------------------|--------------------|--------------------|
| 1     | Et <sub>2</sub> O | Cu(OAc) <sub>2</sub> (1.0)              | --                 | ND                 |
| 3     | Et <sub>2</sub> O | HMPA (5.0), Cu(OAc) <sub>2</sub> (1.0)  | --                 | ND                 |
| 2     | Et <sub>2</sub> O | TMEDA (5.0), Cu(OAc) <sub>2</sub> (1.0) | --                 | ND                 |
| 4     | Et <sub>2</sub> O | LiHMDS (2.0)                            | 4:1                | 10%                |
| 5     | THF               | LiHMDS (2.0)                            | --                 | trace              |
| 6     | 2-MeTHF           | LiHMDS (2.0)                            | --                 | trace              |
| 7     | MTBE              | LiHMDS (2.0)                            | --                 | trace              |
| 8     | THF               | CsF (4.0)                               | --                 | trace              |
| 9     | THF               | HMPA (5.0), LiHMDS (2.0)                | --                 | trace              |

<sup>a</sup>Reaction was performed using isopropenylmagnesium bromide (0.12 mmol) and CuBr·SMe<sub>2</sub> in 1.5 mL solvent at the note temperature and stirred for 30 min; then enone **3** (0.1 mmol) was added to the reaction mixture. After the starting material (**3**) disappeared, additives and (4-MeOC<sub>6</sub>H<sub>4</sub>)<sub>2</sub>IOTf (0.2 mmol) in DMF were added to the reaction mixture; <sup>b</sup>Isolated yield; ND = No detected; TMEDA = *N,N,N',N'*-tetramethylethylenediamine; HMPA = Hexamethylphosphoramide; rt = Room temperature; IsopropenylMgBr = Isopropenylmagnesium bromide; HMPA = Hexamethylphosphoramide; LiHMDS = Lithium bis(trimethylsilyl)amide; MTBE = *tert*-Butyl methyl ether; DMF = *N,N*-Dimethylformamide; THF = Tetrahydrofuran; 2-MeTHF = 2-Methyltetrahydrofuran.

To a stirred suspension of CuBr·SMe<sub>2</sub> (2.05 mg, 0.01 mmol, 0.1 equiv.) and HMPA (174.0 μL, 0.5 mmol, 5.0 equiv.) in Et<sub>2</sub>O (1.0 mL) was slowly added *via* syringe a solution of isopropenylmagnesium bromide (0.4 mL, 0.5 M in THF, 2.0 equiv.) at -78 °C under an argon atmosphere. The mixture was stirred for approximate 30 min at -78 °C until a homogeneous solution was observed. Enone **3** (13.6 mg, 1.0 mmol) was then added at -78 °C. After the starting material disappeared, **CsF** (60.8 mg, 0.4 mmol, 4.0 equiv.) was

added and the reaction was stirred for 10 minutes. Subsequently, diaryliodonium triflate (4-MeOC<sub>6</sub>H<sub>4</sub>)<sub>2</sub>IOTf (102.4 mg, 0.2 mmol, 2.0 equiv.) in anhydrous DMF (1.5 mL) was added *via* syringe. The reaction mixture was stirred for 24 h at room temperature, and quenched with a saturated aqueous solution of NH<sub>4</sub>Cl. The mixture was extracted with diethyl ether (3x30 mL) and the combined organic layers were washed with water and brine, dried over Na<sub>2</sub>SO<sub>4</sub>, filtered, and concentrated under vacuum. The resultant crude products (dr = 4:1) were purified by flash column chromatography on silica gel, eluting with 0.5-1% Et<sub>2</sub>O/pentane to only afford the Michael addition product **Int 2** (11.9 mg, 67.0% yield) and its isomer **Int 2'** (3.2 mg, 18.0% yield). (R<sub>f</sub> = 0.50 and 0.51, respectively, 20% Et<sub>2</sub>O/pentane).

## 2) Diisopropenylzinc:

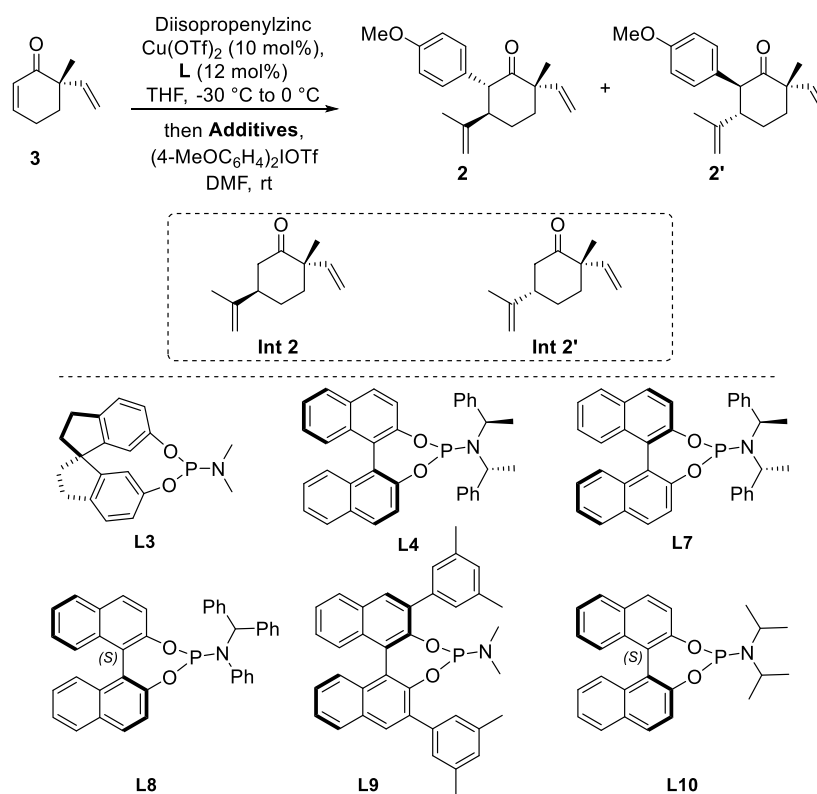

Cu(OTf)<sub>2</sub> (4.0 mg, 0.01 mmol, 0.1 equiv.) and chiral ligands (0.01 mmol, 0.12 equiv.) were suspended in dry THF (1.0 mL) and stirred at room temperature for 30 min before cooling to -30 °C, diisopropenylzinc (0.61 mL, 0.33 mol/L in THF, 2.0 equiv.) was added dropwise. The mixture was stirred for approximate 30 min at -30 °C, and enone **3** (13.6 mg, 0.1 mmol) was then added. The mixture was slowly warmed up to room temperature and stirred for 12 h. **CsF** (60.8 mg, 0.4 mmol, 4.0 equiv.) was added and the reaction was stirred for 10 minutes, then diaryliodonium triflate (4-MeOC<sub>6</sub>H<sub>4</sub>)<sub>2</sub>IOTf (102.4 mg, 0.2 mmol, 0.2 equiv.) in anhydrous DMF (1.5 mL) was added *via* syringe. The reaction mixture was stirred for 24 h

at room temperature, and quenched with a saturated aqueous solution of  $\text{NH}_4\text{Cl}$ . The mixture was extracted with diethyl ether (3×30 mL) and the combined organic layers were washed with water and brine, dried over  $\text{Na}_2\text{SO}_4$ , filtered, and concentrated under vacuum. The resultant crude products (dr~1.4:1) were purified by flash column chromatography on silica gel, eluting with 0.5-1.0%  $\text{Et}_2\text{O}$ /pentane to only afford the Michael addition product **Int 2** (6.4 mg, 36.0% yield) and its isomer **Int 2'** (4.6 mg, 25.7% yield), and without the isolation of expected products **2** and **2'**,

#### Preparation of diisopropenylzinc reagent<sup>8</sup>

##### Preparation of isopropenylMgBr·LiCl

In an oven-dried 10 mL flask, Mg turnings (97.2 mg, 4.0 mmol),  $\text{I}_2$  (5 mg, 0.02 mmol) and LiCl (84.8 mg, 2.0 mmol) were weighed. The system was evacuated and backfilled with argon three times. THF (2.0 mL) was added at room temperature and stirred for 5 minutes. The mixture was then cooled to 0 °C and 2-bromopropene (0.18 mL, 2.0 mmol) was added dropwise. The mixture was removed from the ice bath and allowed to stir for 1 h at room temperature.

##### Preparation of diisopropenylzinc

In an oven-dried flask,  $\text{ZnCl}_2$  (1.0 mL, 1.0 mol/L in THF, 1.0 equiv., 1.0 mmol) was added under the argon atmosphere. Then, isopropenylMgBr·LiCl (2.0 mL, 2.0 equiv., 2.0 mmol) was added dropwise *via* syringe. A dense-grey solution was formed and used without further titration ( $c = 0.33$  mol/L).

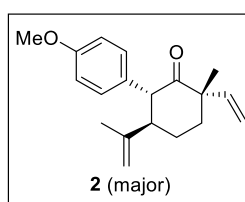

**Precursor 2:** Yellow oil;  $[\alpha]_D^{25} = 82.3$  ( $c = 0.5$  in MeOH).

**<sup>1</sup>H NMR** (400 MHz,  $\text{CDCl}_3$ )  $\delta$ : 6.93 (d,  $J = 8.6$  Hz, 2H), 6.81 (d,  $J = 8.6$  Hz, 2H), 6.23 (dd,  $J = 17.6, 10.8$  Hz, 1H), 5.10 (d,  $J = 10.8$  Hz, 1H), 5.04 (d,  $J = 17.6$  Hz, 1H), 4.60 (brs, 2H), 3.84 (d,  $J = 12.4$  Hz, 1H), 3.77 (s, 3H), 2.74 (td,  $J = 12.4, 3.6$  Hz, 1H), 2.19-2.08 (m, 1H),

2.03-1.84 (m, 3H), 1.59 (s, 3H), 1.44 (s, 3H); **<sup>13</sup>C NMR** (100 MHz,  $\text{CDCl}_3$ )  $\delta$ : 212.1, 158.2, 145.8, 142.9, 130.3, 129.0, 113.4, 112.8, 112.3, 56.0, 55.1, 53.1, 50.5, 36.7, 27.3, 23.0, 18.8. **HRMS** (ESI)  $m/z$  found 285.1846, calculated for  $\text{C}_{18}\text{H}_{25}\text{O}_2$   $[\text{M}+\text{H}]^+$  285.1849. **MS** (EI)  $m/z$  (%): 284 (33), 257 (30), 236 (25), 186 (28), 160 (36), 121(100), 107 (30). **IR** (KBr plate)  $\nu_{\text{max}}$ : 2935, 2868, 2836, 1707, 1643, 1612, 1514, 1461, 1249, 1179, 1038, 914, 894, 817, 783  $\text{cm}^{-1}$ .

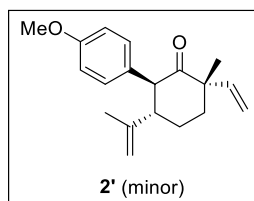

**Precursor 2'**: Yellow oil;  $[\alpha]_D^{24} = -125.6$  ( $c = 0.5$  in MeOH).

**$^1\text{H NMR}$**  (600 MHz,  $\text{CDCl}_3$ )  $\delta$ : 6.93 (d,  $J = 8.4$  Hz, 2H), 6.82 (d,  $J = 8.6$  Hz, 2H), 6.06 (dd,  $J = 17.4, 10.2$  Hz, 1H), 5.26 (d,  $J = 10.8$  Hz, 1H), 5.07 (d,  $J = 18.0$  Hz, 1H), 4.59 (brs, 1H), 4.57 (brs, 1H), 3.90 (d,  $J = 12.6$  Hz, 1H), 3.78 (s, 3H), 2.74 (t,  $J = 13.2$  Hz, 1H),

2.17-2.08 (m, 2H), 1.81-1.75 (m, 2H), 1.55 (s, 3H), 1.17 (s, 3H);  **$^{13}\text{C NMR}$**  (150 MHz,  $\text{CDCl}_3$ )  $\delta$ : 211.2, 158.2, 145.8, 142.8, 130.3, 129.0, 116.0, 113.4, 112.6, 56.8, 55.1, 53.9, 52.2, 39.0, 28.2, 24.8, 18.6. **HRMS** (ESI)  $m/z$  found 285.1847, calculated for  $\text{C}_{18}\text{H}_{25}\text{O}_2$   $[\text{M}+\text{H}]^+$  285.1849. **MS** (EI)  $m/z$  (%): 284 (30), 173 (24), 159 (19), 135 (21), 121 (100), 91 (12). **IR** (KBr plate)  $\nu_{\text{max}}$ : 2933, 2867, 1709, 1615, 1514, 1458, 1249, 1179, 1067, 966, 892, 817, 750  $\text{cm}^{-1}$ .

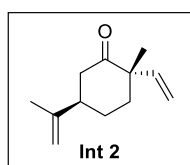

**Int 2**: Colorless oil;  $[\alpha]_D^{18} = 19.2$  ( $c = 1.0$  in  $\text{CHCl}_3$ ).

**$^1\text{H NMR}$**  (600 MHz,  $\text{CDCl}_3$ )  $\delta$ : 6.07 (dd,  $J = 18.0, 10.8$  Hz, 1H), 5.12 (d,  $J = 11.4$  Hz, 1H), 5.02 (d,  $J = 18.0$  Hz, 1H), 4.80 (brs, 1H), 4.71 (brs, 1H), 2.56-2.52 (m, 1H), 2.48-2.44 (m, 2H), 1.91-1.86 (m, 1H), 1.82-1.75 (m,

3H), 1.73 (s, 3H), 1.23 (s, 3H);  **$^{13}\text{C NMR}$**  (150 MHz,  $\text{CDCl}_3$ )  $\delta$ : 213.4, 147.1, 142.7, 113.4, 110.6, 50.7, 44.9, 43.0, 36.0, 25.5, 22.9, 21.0. **HRMS** (ESI)  $m/z$  found 285.1848, calculated for  $\text{C}_{18}\text{H}_{25}\text{O}_2$   $[\text{M}+\text{H}]^+$  285.1849. **MS** (EI)  $m/z$  (%): 178 (59), 121 (78), 111 (84), 107 (63), 105 (100).

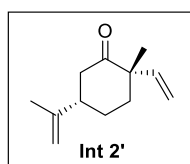

**Int 2'**: Colorless oil;  $[\alpha]_D^{18} = 96.9$  ( $c = 1.0$  in  $\text{CHCl}_3$ ).

**$^1\text{H NMR}$**  (600 MHz,  $\text{CDCl}_3$ )  $\delta$ : 5.91 (dd,  $J = 17.4, 10.2$  Hz, 1H), 5.15 (d,  $J = 10.8$  Hz, 1H), 5.00 (d,  $J = 18.0$  Hz, 1H), 4.75 (brs, 1H), 4.71 (brs, 1H), 2.55 (t,  $J = 13.8$  Hz, 1H), 2.36-2.31 (m, 2H), 2.06 (dt,  $J = 13.8, 3.6$

Hz, 1H), 1.78-1.74 (m, 2H), 1.72 (s, 3H), 1.62-1.57 (m, 1H), 1.14 (s, 3H);  **$^{13}\text{C NMR}$**  (150 MHz,  $\text{CDCl}_3$ )  $\delta$ : 212.6, 147.5, 142.3, 115.6, 109.7, 51.6, 46.7, 44.1, 38.8, 27.1, 24.0, 20.4. **HRMS** (ESI)  $m/z$  found 285.1849, calculated for  $\text{C}_{18}\text{H}_{25}\text{O}_2$   $[\text{M}+\text{H}]^+$  285.1849. **MS** (EI)  $m/z$  (%): 178 (1), 121 (9), 111 (6), 107 (5), 105 (100).

### 3. Collective total syntheses of 7 $\alpha$ -aryl-12 $\beta$ -alkyl type meroterpenoids

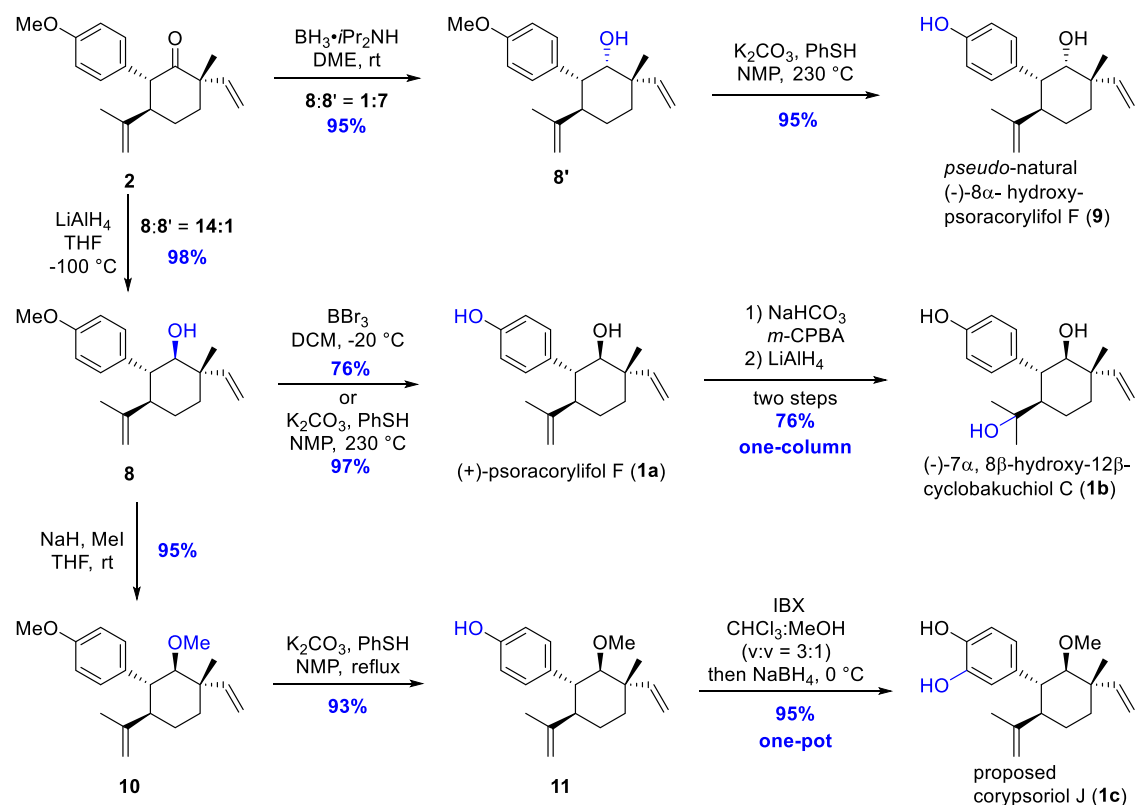

**Scheme S2** Collective total syntheses of 7 $\alpha$ -aryl-12 $\beta$ -alkyl type meroterpenoids.

#### 3.1 Synthesis of natural (+)-psoracorylifol F (**1a**)

##### 3.1.1 Synthesis of compounds **8** and **8'**

###### Method:

To a solution of the precursor **2** (5.0 mg, 0.018 mmol) in solvents (1.0 mL) was added reductants (0.09 mmol, 5.0 equiv.) under an argon atmosphere at the noted temperature, respectively. When the reaction completed (monitored by TLC), the reaction mixture was quenched with a saturated aqueous solution of  $\text{NH}_4\text{Cl}$ , and extracted with  $\text{CH}_2\text{Cl}_2$  (3 $\times$ 20 mL). The combined organic phase was washed with brine, dried over  $\text{Na}_2\text{SO}_4$ , and filtered. The filtrate was concentrated under reduced pressure, and the dr value was measured by  $^1\text{H}$  NMR (entries 1-6, Table S5).

Table S5. Optimization of the reduction conditions of the precursor **2**

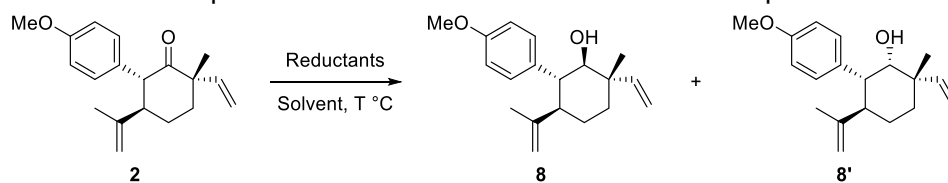

| Entry    | reductors                                      | Solvents          | Temp.          | dr ( <b>8:8'</b> ) | yield <sup>b</sup> |
|----------|------------------------------------------------|-------------------|----------------|--------------------|--------------------|
| <b>1</b> | <b>LiAlH<sub>4</sub></b>                       | <b>THF</b>        | <b>-100 °C</b> | <b>14:1</b>        | <b>98%</b>         |
| 2        | LiAlH <sub>4</sub>                             | Et <sub>2</sub> O | -100 °C        | 4:1                | 98%                |
| 3        | BH <sub>3</sub> ·Me <sub>2</sub> NH            | DME               | rt             | 1:4.6              | 96%                |
| 4        | BH <sub>3</sub> ·Me <sub>2</sub> NH            | DME               | -60 °C         | 1:4                | 95%                |
| 5        | BH <sub>3</sub> · <i>i</i> Pr <sub>2</sub> NH  | DME               | -60 °C         | 1:3                | 90%                |
| <b>5</b> | <b>BH<sub>3</sub>·<i>i</i>Pr<sub>2</sub>NH</b> | <b>DME</b>        | <b>rt</b>      | <b>1:7</b>         | <b>95%</b>         |
| 6        | BH <sub>3</sub> · <i>i</i> Pr <sub>2</sub> NH  | DME               | 90 °C          | 1:7                | 56%                |

<sup>a</sup>The reactions were performed using the precursor **2** (0.018 mmol), reductants (5.0 equiv.) in 1.0 mL THF;

<sup>b</sup>Isolated yield; rt = Room temperature; THF = Tetrahydrofuran; DME = 1,2-dimethoxyethane.

**Method I (entry 1, Table S6):**

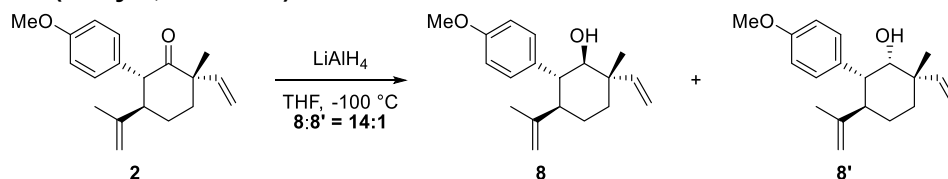

To a solution of the precursor **2** (5.0 mg, 0.018 mmol) in THF (1.0 mL) was added LiAlH<sub>4</sub> (3.4 mg, 0.09 mmol) under an argon atmosphere at -100 °C, and the mixture was stirred for 2 h. When the reaction completed (monitored by TLC), the reaction mixture was quenched with a saturated aqueous solution of NH<sub>4</sub>Cl, and extracted with CH<sub>2</sub>Cl<sub>2</sub> (3×20 mL). The combined organic phase was washed with brine, dried over Na<sub>2</sub>SO<sub>4</sub>, and filtered. The filtrate was concentrated under reduced pressure. The resulting crude product **8** and **8'** (dr = 14:1) was purified by flash column chromatography (silica gel, petroleum ether/ethyl acetate (50:1)) to give the desired product **8** (4.6 mg, 91% yield) as a white solid and its isomer **8'** (0.35 mg, 7% yield).

**Method II (entry 5, Table S6):**

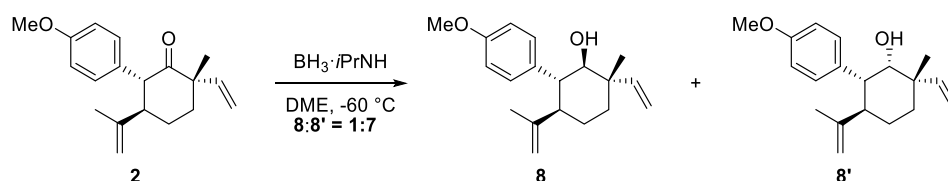

To a solution of the precursor **2** (5.0 mg, 0.018 mmol) in DME (1.0 mL) was added BH<sub>3</sub>·*i*Pr<sub>2</sub>NH (10.3 mg, 0.09 mmol) under an argon atmosphere at -60 °C, and the mixture

was stirred for 24h. When the reaction completed (monitored by TLC), the reaction mixture was quenched with a saturated aqueous solution of  $\text{NH}_4\text{Cl}$ , and extracted with  $\text{CH}_2\text{Cl}_2$  (3×20 mL). The combined organic phase was washed with brine, dried over  $\text{Na}_2\text{SO}_4$ , and filtered. The filtrate was concentrated under reduced pressure. The resulting crude product **8** and **8'** (dr = 1:7) was purified by flash column chromatography (silica gel, petroleum ether/ethyl acetate (50:1)) to give the desired product **8'** (4.2 mg, 83% yield) as a white solid and its isomer **8** (0.6 mg, 12% yield).

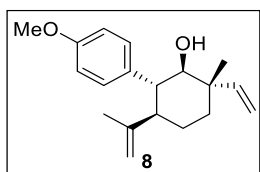

**Compound 8:** Colorless needle;  $[\alpha]_D^{25} = 3.9$  ( $c = 0.5$  in MeOH); **m.p.:** 105-107 °C.

**$^1\text{H NMR}$**  (400 MHz,  $\text{CDCl}_3$ )  $\delta$ : 7.12 (d,  $J = 8.4$  Hz, 2H), 6.84 (d,  $J = 8.4$  Hz, 2H), 5.92 (dd,  $J = 17.6, 10.8$  Hz, 1H), 5.11 (dd,  $J = 17.6, 1.2$  Hz, 1H), 5.07 (dd,  $J = 10.8, 0.8$  Hz, 1H), 4.53 (brs, 2H), 4.78 (s, 3H), 3.45 (d,  $J = 10.4$  Hz, 1H), 2.68 (t,  $J = 11.6$  Hz, 1H), 2.37 (td,  $J = 11.6, 3.6$  Hz, 1H), 1.79-1.64 (m, 1H), 1.63-1.56 (m, 3H), 1.54 (s, 3H), 1.18 (s, 3H);  **$^{13}\text{C NMR}$**  (100 MHz,  $\text{CDCl}_3$ )  $\delta$ : 158.2, 147.9, 147.0, 133.0, 129.3, 113.8, 112.1, 111.7, 78.9, 55.1, 50.9, 49.0, 41.7, 36.2, 27.3, 19.5, 15.2. **HRMS** (ESI)  $m/z$  found 309.1826, calculated for  $\text{C}_{18}\text{H}_{24}\text{O}_2\text{Na}$   $[\text{M}+\text{Na}]^+$  309.1825. **MS** (EI)  $m/z$  (%): 286 (87), 253 (5), 204 (8), 150 (100), 137 (22), 121(91). **IR** (KBr plate)  $\nu_{\text{max}}$ : 3506, 3069, 2975, 2928, 2903, 2852, 1720, 1611, 1512, 1298, 810  $\text{cm}^{-1}$ .

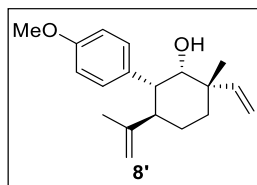

**Compound 8':** White solid;  $[\alpha]_D^{25} = 35.6$  ( $c = 0.5$  in MeOH); **m.p.:** 82-83 °C.

**$^1\text{H NMR}$**  (400 MHz,  $\text{CDCl}_3$ )  $\delta$ : 7.15 (d,  $J = 8.4$  Hz, 2H), 6.83 (d,  $J = 8.4$  Hz, 2H), 5.88 (dd,  $J = 17.6, 10.8$  Hz, 1H), 5.11 (dd,  $J = 4.4, 0.8$  Hz, 1H), 5.08 (dd,  $J = 11.2, 1.2$  Hz, 1H), 4.70 (brs, 1H), 4.63 (brs, 1H), 3.77 (s, 3H), 3.39 (brs, 1H), 3.00 (dd,  $J = 12.4, 2.0$  Hz, 1H), 2.94-2.90 (m, 1H), 2.05-1.99 (m, 1H), 1.73-1.71 (m, 2H), 1.56 (s, 3H), 1.40 (dt,  $J = 13.2, 2.8$  Hz, 1H), 1.20 (s, 3H);  **$^{13}\text{C NMR}$**  (100 MHz,  $\text{CDCl}_3$ )  $\delta$ : 158.0, 147.9, 147.0, 134.1, 129.8, 113.4, 112.8, 111.9, 77.5, 55.1, 45.4, 42.0, 41.4, 28.5, 28.0, 22.4, 19.2. **HRMS** (ESI)  $m/z$  found 309.1827, calculated for  $\text{C}_{18}\text{H}_{24}\text{O}_2\text{Na}$   $[\text{M}+\text{Na}]^+$  309.1825. **MS** (EI)  $m/z$  (%): 286 (23), 150 (71), 137 (16), 121 (100), 68 (13), 55 (10). **IR** (KBr plate)  $\nu_{\text{max}}$ : 3461, 3075, 2927, 2858, 1643, 1611, 1583, 1511, 1456, 1248, 1178, 1038, 912, 887, 821  $\text{cm}^{-1}$ .



### 3.1.2 Synthesis of natural (+)-psoracorylifol F (1a)

#### Method I:

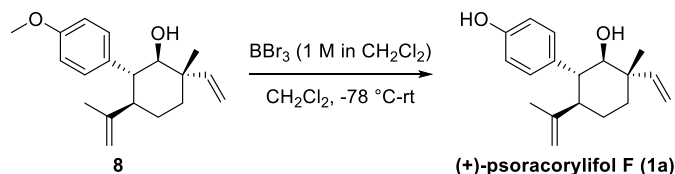

To a stirred solution of alcohol **8** (28.4 mg, 0.1 mmol) in dry  $\text{CH}_2\text{Cl}_2$  (2.0 mL) at  $-78^\circ\text{C}$  was added  $\text{BBr}_3$  (0.6 mL, 0.6 mmol, 1 M in  $\text{CH}_2\text{Cl}_2$ , 6.0 equiv.). After stirred for at  $-40^\circ\text{C}$  for 12 h, and gradually warmed to room temperature for 16 h, after which reaction was quenched by careful addition of  $\text{H}_2\text{O}$  (1.0 mL) at  $0^\circ\text{C}$ . The pH of the aqueous layer was adjusted to pH 8 using sat.  $\text{NaHCO}_3$  before being extracted  $\text{CH}_2\text{Cl}_2$  (3x20 mL). The combined organic layer was washed with brine, dried with  $\text{Na}_2\text{SO}_4$ , and concentrated in vacuum. The crude product was purified by preparative thin layer chromatography (petroleum ether/ethyl acetate) to afford (+)-psoracorylifol F (**1a**) (20.7 mg, 76% yield) as a white solid.

#### Method II:

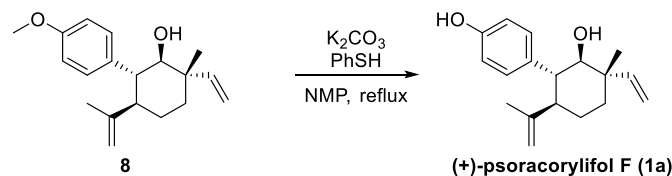

To a suspension solution of alcohol **8** (19.4 mg, 0.067 mmol) and  $\text{K}_2\text{CO}_3$  (3.7 mg, 0.027 mmol) in NMP (1.0 mL) was added PhSH (27.3  $\mu\text{L}$ , 0.27 mmol). The mixture was stirred under reflux for 12 h, and then cooled to room temperature and quenched with  $\text{H}_2\text{O}$ . The resulting mixture was extracted with ethyl acetate (3x20 mL). The combined organic phase was washed with brine, dried over  $\text{Na}_2\text{SO}_4$ , and concentrated. The crude product was purified by chromatography on silica gel (petroleum ether/ethyl acetate) to give (+)-psoracorylifol F (**1a**) (17.7 mg, 97% yield) as a white solid.

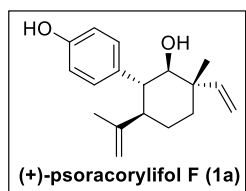

**(+)-psoracorylifol F (1a):** White solid;  $[\alpha]_D^{25} = +6.7$  ( $c = 0.1$  in MeOH); m.p.:  $157\text{-}159^\circ\text{C}$ .

**$^1\text{H NMR}$**  (600 MHz, methanol- $d_4$ )  $\delta$ : 6.91 (d,  $J = 8.4$  Hz, 2H), 6.57 (d,  $J = 8.4$  Hz, 2H), 5.88 (dd,  $J = 18.0, 10.8$  Hz, 1H), 4.94 (dd,  $J = 17.4, 1.2$  Hz, 1H), 4.87 (dd,  $J = 10.8, 1.8$  Hz, 1H), 4.40 (brs, 1H),

4.37 (brs, 1H), 3.37 (d,  $J = 10.8$  Hz, 1H), 2.54 (t,  $J = 10.8$  Hz, 1H), 2.23 (td,  $J = 12.0, 3.6$  Hz, 1H), 1.69-1.60 (m, 1H), 1.56-1.51 (m, 1H), 1.48-1.45 (m, 1H), 1.44-1.40 (m, 1H), 1.41 (s, 3H), 1.04 (s, 3H);  **$^{13}\text{C NMR}$**  (150 MHz, methanol- $d_4$ )  $\delta$ : 156.8, 150.1, 149.1, 134.7, 131.0,

116.1, 112.3, 111.9, 80.6, 53.4, 51.0, 43.3, 37.6, 28.9, 20.1, 16.6. **HRMS** (ESI) *m/z* found 295.1669, calculated for C<sub>18</sub>H<sub>24</sub>O<sub>2</sub>Na [M+Na]<sup>+</sup> 295.1669. **MS** (EI) *m/z* (%): 272 (89), 245 (56), 220 (60), 187 (43), 121 (63), 113 (69), 100 (55). **IR** (KBr plate)  $\nu_{\text{max}}$ : 3344, 2969, 2924, 2866, 1643, 1615, 1600, 1514, 1245, 1081, 822 cm<sup>-1</sup>.

### Comparison of <sup>1</sup>H NMR data for synthetic and natural (+)-psoracorylifol F

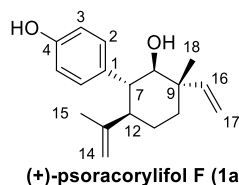

| Position | Natural psoracorylifol F <sup>a,9</sup> | Synthetic psoracorylifol F <sup>b</sup> | $\Delta\delta$ (ppm) |
|----------|-----------------------------------------|-----------------------------------------|----------------------|
| 1        | -                                       | -                                       | -                    |
| 2,5      | 6.90, d ( $J = 8.5$ Hz)                 | 6.91, d ( $J = 8.4$ Hz)                 | -0.01                |
| 3,6      | 6.58, d ( $J = 8.5$ Hz)                 | 6.57, d ( $J = 8.4$ Hz)                 | 0.01                 |
| 4        | -                                       | -                                       | -                    |
| 7        | 2.54, t ( $J = 11.0$ Hz)                | 2.54, t ( $J = 10.8$ Hz)                | 0.00                 |
| 8        | 3.37, d ( $J = 10.5$ Hz)                | 3.37, d ( $J = 10.8$ Hz)                | 0.00                 |
| 9        | -                                       | -                                       | -                    |
| 10       | 1.44, m                                 | 1.44-1.40, m (1.42, m)                  | 0.02                 |
|          | 1.64, m                                 | 1.69-1.59, m (1.64, m)                  | 0.00                 |
| 11       | 1.48, m                                 | 1.48-1.45, m (1.47, m)                  | 0.01                 |
|          | 1.54, o <sup>c</sup>                    | 1.56-1.51, m (1.54, m)                  | 0.00                 |
| 12       | 2.24, m                                 | 2.23, td ( $J = 12.0, 3.6$ Hz)          | 0.01                 |
| 13       | -                                       | -                                       | -                    |
| 14       | 4.36, s                                 | 4.37, brs                               | -0.01                |
|          | 4.40, s                                 | 4.40, brs                               | 0.00                 |
| 15       | 1.41, s                                 | 1.41, s                                 | 0.00                 |
| 16       | 5.87, dd ( $J = 17.5, 11.0$ Hz)         | 5.88, dd ( $J = 18.0, 10.8$ Hz)         | -0.01                |
| 17       | 4.86, dd ( $J = 11.0, 1.5$ Hz)          | 4.87, dd ( $J = 10.8, 1.8$ Hz)          | -0.01                |
|          | 4.94, dd ( $J = 18.0, 1.5$ Hz)          | 4.94, dd ( $J = 17.4, 1.2$ Hz)          | 0.00                 |
| 18       | 1.04, s                                 | 1.04, s                                 | 0.00                 |

<sup>a</sup> NMR data measured at 500 MHz in methanol-*d*<sub>4</sub>; <sup>b</sup> NMR data measured at 600 MHz in methanol-*d*<sub>4</sub>; <sup>c</sup> "o" means overlapped.

## Comparison of $^1\text{H}$ NMR spectra of (+)-psoracorylifol F

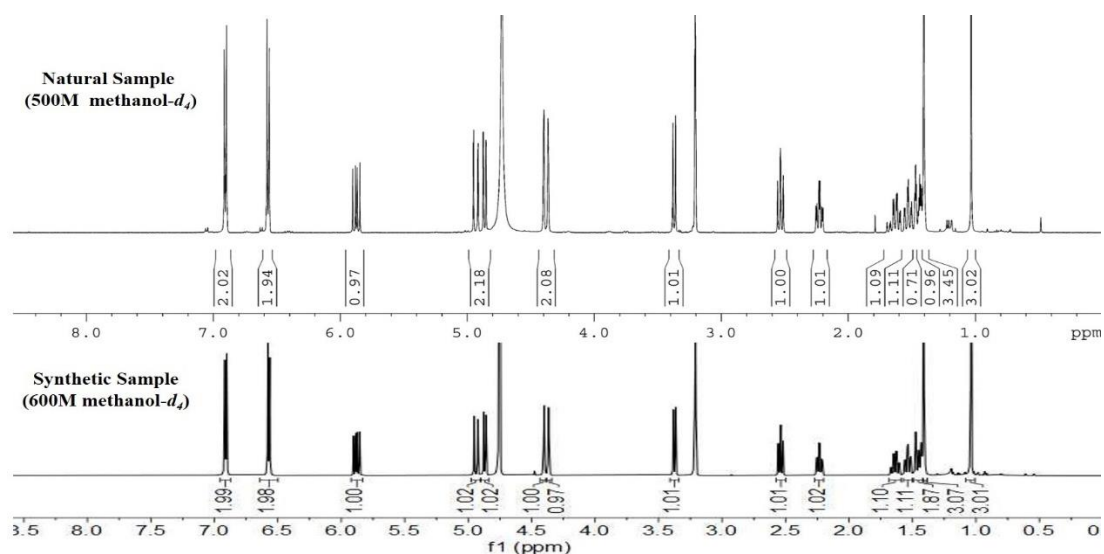

## Comparison of $^{13}\text{C}$ NMR data for synthetic and natural (+)-psoracorylifol F

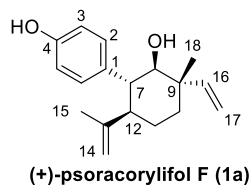

| Position | Natural psoracorylifol F <sup>a,9</sup> | Synthetic psoracorylifol F <sup>b</sup> | $\Delta\delta$ (ppm) |
|----------|-----------------------------------------|-----------------------------------------|----------------------|
| 1        | 134.9                                   | 134.7                                   | 0.2                  |
| 2        | 131.0                                   | 131.0                                   | 0.0                  |
| 3        | 116.1                                   | 116.1                                   | 0.0                  |
| 4        | 156.8                                   | 156.8                                   | 0.0                  |
| 5        | 116.1                                   | 116.1                                   | 0.0                  |
| 6        | 131.0                                   | 131.0                                   | 0.0                  |
| 7        | 51.0                                    | 51.0                                    | 0.0                  |
| 8        | 80.6                                    | 80.6                                    | 0.0                  |
| 9        | 43.3                                    | 43.3                                    | 0.0                  |
| 10       | 37.6                                    | 37.6                                    | 0.0                  |
| 11       | 28.9                                    | 28.9                                    | 0.0                  |
| 12       | 53.4                                    | 53.4                                    | 0.0                  |
| 13       | 149.1                                   | 149.1                                   | 0.0                  |
| 14       | 112.3                                   | 112.3                                   | 0.0                  |
| 15       | 20.2                                    | 20.1                                    | 0.1                  |
| 16       | 150.0                                   | 150.1                                   | -0.1                 |
| 17       | 111.9                                   | 111.9                                   | 0.0                  |
| 18       | 16.6                                    | 16.6                                    | 0.0                  |

<sup>a</sup> NMR data measured at 125 MHz in methanol- $d_4$ ; <sup>b</sup> NMR data measured at 150 MHz in methanol- $d_4$ .

## Comparison of $^{13}\text{C}$ NMR spectra of (+)-psoracorylifol F

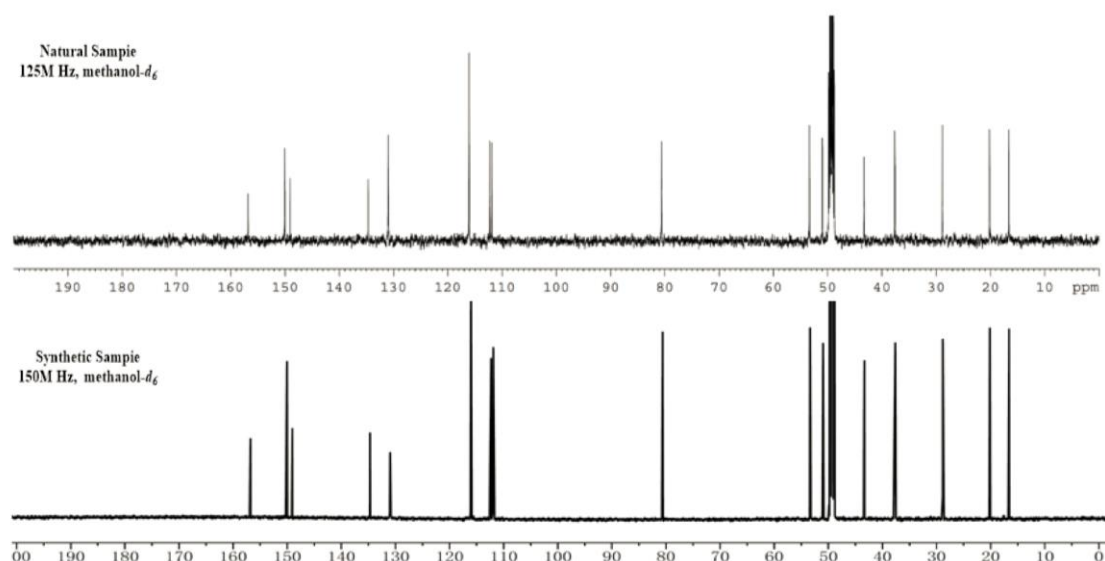

## 3.2 Synthesis of *pseudo*-natural (-)-8 $\alpha$ -hydroxy-psoracorylifol F (9)

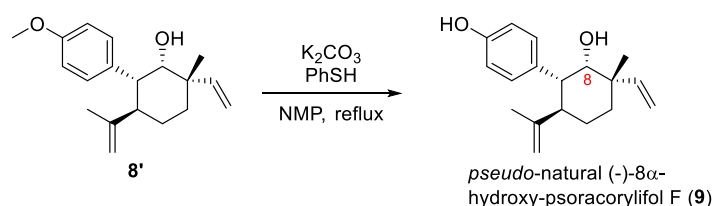

To a suspension solution of alcohol **8'** (10.0 mg, 0.035 mmol) and  $\text{K}_2\text{CO}_3$  (1.9 mg, 0.014 mmol) in NMP (1.0 mL) was added PhSH (17.9  $\mu\text{L}$ , 0.175 mmol). The mixture was stirred under reflux for 12 h, then cooled to room temperature and quenched with  $\text{H}_2\text{O}$ . The resulting mixture was extracted with ethyl acetate (3 $\times$ 20 mL). The combined extracts were washed with brine, dried over  $\text{Na}_2\text{SO}_4$ . The solvent was removed under vacuum, and the residue was purified by flash column chromatography (petroleum ether/ethyl acetate, 20:1-10:1) on silica gel to give *pseudo*-natural (-)-8 $\alpha$ -hydroxy-psoracorylifol F (**9**) (9.0 mg, 95% yield) as a white solid.

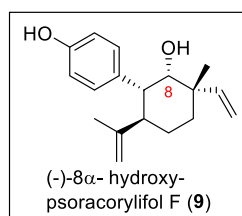

***Pseudo*-natural (-)-8 $\alpha$ -hydroxy-psoracorylifol F (9):** White solid.  $[\alpha]_D^{21} = -40.7$  ( $c = 1.0$  in MeOH). **m.p.:** 114-116  $^\circ\text{C}$ .

**$^1\text{H}$  NMR** (600 MHz,  $\text{CDCl}_3$ )  $\delta$ : 7.09 (d,  $J = 8.4$  Hz, 2H), 6.74 (d,  $J = 8.4$  Hz, 2H), 5.88 (dd,  $J = 18.0, 11.4$  Hz, 1H), 5.10 (d,  $J = 10.8$  Hz, 1H), 5.08 (d,  $J = 16.8$  Hz, 1H), 4.68 (s, 1H), 4.61 (brs, 2H), 3.38 (s, 1H),

2.98 (dd,  $J = 12.6, 1.8$  Hz, 1H), 2.90-2.86 (m, 1H), 2.05-1.99 (m, 1H), 1.72-1.68 (m, 2H), 1.54 (s, 3H), 1.40 (dt,  $J = 13.2, 3.0$  Hz, 1H), 1.19 (s, 3H);  **$^{13}\text{C}$  NMR** (150 MHz,  $\text{CDCl}_3$ )  $\delta$ : 153.9, 147.9, 147.0, 134.4, 130.0, 115.0, 112.9, 111.9, 77.5, 45.4, 42.0, 41.4, 28.5, 28.0,

22.4, 19.2. **HRMS** (ESI)  $m/z$  found 295.1671, calculated for  $C_{18}H_{24}O_2Na$   $[M+Na]^+$  295.1669. **MS** (EI)  $m/z$  (%): 272 (17), 136 (87), 123 (21), 107 (100), 68 (17), 55 (11). **IR** (KBr plate)  $\nu_{max}$ : 3394, 3076, 2963, 2922, 2861, 1641, 1613, 1514, 1451, 1374, 1224, 1174, 963, 912, 888, 821  $cm^{-1}$ .

### 3.3 Synthesis of natural (-)-7 $\alpha$ ,8 $\beta$ -hydroxy-12 $\beta$ -cyclobakuchiol C (1b)

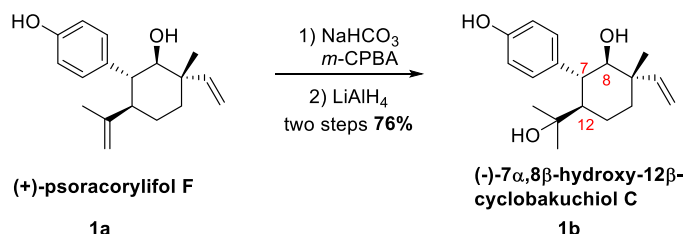

To an ice-cold suspension solution of  $\text{NaHCO}_3$  (21.0 mg, 0.25 mmol) and  $m\text{-CPBA}$  (13.4 mg, 80%, 0.06 mmol) in  $\text{CH}_2\text{Cl}_2$  (1.0 mL) was added a solution of (+)-psoracorylifol F (**1a**, 14.8 mg, 0.05 mmol) in  $\text{CH}_2\text{Cl}_2$  (1.0 mL) at 0 °C. The mixture was stirred at 5 °C for 4 h and the reaction was quenched by addition of  $\text{Me}_2\text{S}$  (5.3  $\mu\text{L}$ , 0.07 mmol) and saturated  $\text{NaHCO}_3$  with vigorous stirring. The layers were separated and the aqueous layer was extracted with  $\text{CH}_2\text{Cl}_2$  (3 $\times$ 20 mL). The combined extracts were washed with brine, dried over  $\text{Na}_2\text{SO}_4$ , and concentrated to give a residue, which was directly used for the next step. To an ice-cold solution of above oxirane in THF (2.0 mL) was added  $\text{LiAlH}_4$  (9.5 mg, 0.25 mmol) slowly at 0 °C. The resulting mixture was stirred for 3 h under reflux, then cooled to room temperature and quenched with  $\text{H}_2\text{O}$ . The resulting mixture was extracted with ethyl acetate (3 $\times$ 20 mL). The combined extracts were washed with saturated  $\text{NaHCO}_3$  and brine, dried over  $\text{Na}_2\text{SO}_4$ , and concentrated. The residual oil was purified by column chromatographed on silica gel (petroleum ether/ethyl acetate) to give (-)-7 $\alpha$ ,8 $\beta$ -hydroxy-12 $\beta$ -cyclobakuchiol C (**1b**) (11.0 mg, 76% yield for 2 steps from natural (+)-psoracorylifol F (**1a**)).

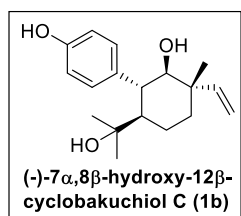

**(-)-7 $\alpha$ ,8 $\beta$ -hydroxy-12 $\beta$ -cyclobakuchiol C (1b)**: Colorless needles;  $[\alpha]_D^{25} = -22.0$  ( $c = 0.1$  in MeOH),  $[\text{lit}^{10}]$ ,  $[\alpha]_D^{25} = -27.2$  ( $c = 0.1$  in MeOH). **m.p.**: 104-106 °C.

**$^1\text{H NMR}$**  (600 MHz, acetone- $d_6$ )  $\delta$ : 8.13 (s, 1H), 7.09 (d,  $J = 7.8$  Hz, 2H), 6.73 (d,  $J = 8.4$  Hz, 2H), 5.97 (dd,  $J = 17.4, 10.8$  Hz, 1H), 4.96 (dd,  $J = 17.4, 1.8$  Hz, 1H), 4.86 (dd,  $J = 10.8, 1.2$  Hz, 1H), 3.40 (dd,  $J = 9.6, 4.2$  Hz, 1H), 2.55 (t,  $J = 11.4$  Hz, 1H), 2.44 (d,  $J = 4.2$  Hz, 1H), 2.21 (s, 1H), 1.90-1.87 (m, 1H), 1.82 (td,  $J = 11.4, 4.2$  Hz, 1H), 1.53-1.51 (m, 2H), 1.44-1.36 (m, 1H), 1.04 (s, 3H), 0.96 (s, 3H), 0.79 (s, 3H);  **$^{13}\text{C NMR}$**  (100 MHz, acetone- $d_6$ )  $\delta$ : 156.8, 149.9, 135.1, 131.1, 116.1, 110.9, 80.4,

73.2, 52.9, 49.4, 42.0, 36.0, 27.6, 23.5, 16.2. **HRMS** (ESI)  $m/z$  found 313.1774, calculated for  $C_{18}H_{26}O_3Na$   $[M+Na]^+$  313.1774. **MS** (EI)  $m/z$  (%): 290 (6), 214 (23), 161 (32), 133 (100), 107 (83), 59 (56). **IR** (KBr plate)  $\nu_{max}$ : 3530, 2920, 2851, 1614, 1514, 1461, 1376, 1229, 1172, 960, 897, 827, 784  $cm^{-1}$ .

**Comparison of  $^1H$  NMR data of synthetic and natural (-)-7 $\alpha$ ,8 $\beta$ -hydroxy-12 $\beta$ -cyclobakuchiol C (1b)**

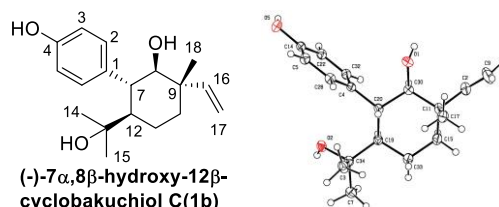

| Position         | Natural                                                                     | Synthetic                                                                | $\Delta\delta$<br>(ppm) |
|------------------|-----------------------------------------------------------------------------|--------------------------------------------------------------------------|-------------------------|
|                  | 7 $\alpha$ ,8 $\beta$ -hydroxy-12 $\beta$ -cyclobakuchiol C <sup>a,10</sup> | 7 $\alpha$ ,8 $\beta$ -hydroxy-12 $\beta$ -cyclobakuchiol C <sup>b</sup> |                         |
| 1                | -                                                                           | -                                                                        | -                       |
| 2,6              | 7.09, d ( $J = 8.0$ Hz)                                                     | 7.09, d ( $J = 7.8$ Hz)                                                  | 0.00                    |
| 3,5              | 6.74, d ( $J = 8.5$ Hz)                                                     | 6.73, d ( $J = 8.4$ Hz)                                                  | 0.01                    |
| 4                | -                                                                           | -                                                                        | -                       |
| 7                | 2.55, t ( $J = 11.0$ Hz)                                                    | 2.55, t ( $J = 11.4$ Hz)                                                 | 0.00                    |
| 8                | 3.41, d ( $J = 10.0$ Hz)                                                    | 3.40, dd ( $J = 9.6, 4.2$ Hz)                                            | 0.01                    |
| 9                | -                                                                           | -                                                                        | -                       |
| 10 <sub>ax</sub> | 1.53, m                                                                     | 1.53-1.51, m (1.52, m)                                                   | 0.01                    |
| 10 <sub>eq</sub> | 1.53, m                                                                     | 1.53-1.51, m (1.52, m)                                                   | 0.01                    |
| 11 <sub>ax</sub> | 1.90, m                                                                     | 1.90-1.87, m (1.89, m)                                                   | 0.01                    |
| 11 <sub>eq</sub> | 1.40, m                                                                     | 1.44-1.36, m (1.40, m)                                                   | 0.00                    |
| 12               | 1.83, m                                                                     | 1.82, td ( $J = 11.4, 4.2$ Hz)                                           | 0.01                    |
| 13               | -                                                                           | -                                                                        | -                       |
| 14               | 0.99, s                                                                     | 0.96 (s)                                                                 | 0.03                    |
| 15               | 0.76, s                                                                     | 0.79 (s)                                                                 | -0.03                   |
| 16               | 5.97, dd ( $J = 17.5, 10.5$ Hz)                                             | 5.97, dd ( $J = 17.4, 10.8$ Hz)                                          | 0.00                    |
| 17 <sub>ax</sub> | 4.97, dd ( $J = 17.5, 1.5$ Hz)                                              | 4.96, dd ( $J = 17.4, 1.8$ Hz)                                           | 0.01                    |
| 17 <sub>eq</sub> | 4.88, dd ( $J = 11.0, 1.5$ Hz)                                              | 4.86, dd ( $J = 10.8, 1.2$ Hz)                                           | 0.02                    |
| 18               | 1.05, s                                                                     | 1.04 (s)                                                                 | 0.01                    |

<sup>a</sup> NMR data measured at 500 MHz in acetone- $d_6$ ; <sup>b</sup> NMR data measured at 600 MHz in acetone- $d_6$ .

## Comparison of $^1\text{H}$ NMR spectra of (-)-7 $\alpha$ ,8 $\beta$ -hydroxy-12 $\beta$ -cyclobakuchiol C (1b)

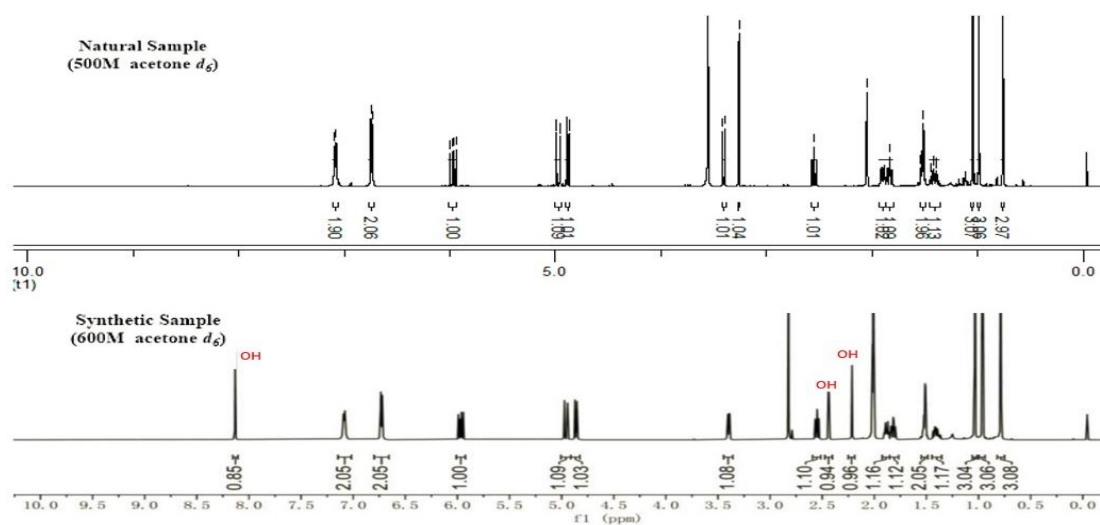

## Comparison of $^{13}\text{C}$ NMR data for synthetic and natural (-)-7 $\alpha$ ,8 $\beta$ -hydroxy-12 $\beta$ -cyclobakuchiol C (1b)

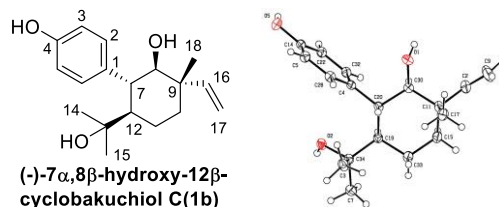

| Position | Natural<br>7 $\alpha$ ,8 $\beta$ -hydroxy-12 $\beta$ -cyclobakuchiol C <sup>a,10</sup> | Synthetic<br>7 $\alpha$ ,8 $\beta$ -hydroxy-12 $\beta$ -cyclobakuchiol C <sup>b</sup> | $\Delta\delta$<br>(ppm) |
|----------|----------------------------------------------------------------------------------------|---------------------------------------------------------------------------------------|-------------------------|
| 1        | 134.8                                                                                  | 135.1                                                                                 | -0.3                    |
| 2,6      | 131.1                                                                                  | 131.1                                                                                 | 0.0                     |
| 3,5      | 116.0                                                                                  | 116.1                                                                                 | -0.1                    |
| 4        | 156.8                                                                                  | 156.8                                                                                 | 0.0                     |
| 7        | 49.3                                                                                   | 49.4                                                                                  | -0.1                    |
| 8        | 80.4                                                                                   | 80.4                                                                                  | 0.0                     |
| 9        | 42.0                                                                                   | 42.0                                                                                  | 0.0                     |
| 10       | 36.1                                                                                   | 36.0                                                                                  | 0.1                     |
| 11       | 23.3                                                                                   | 23.5                                                                                  | -0.2                    |
| 12       | 52.8                                                                                   | 52.9                                                                                  | -0.1                    |
| 13       | 73.4                                                                                   | 73.2                                                                                  | 0.2                     |
| 14       | 27.0                                                                                   | 27.6                                                                                  | -0.6                    |
| 15       | 29.6                                                                                   | 29.2                                                                                  | 0.4                     |
| 16       | 149.8                                                                                  | 149.9                                                                                 | -0.1                    |
| 17       | 111.0                                                                                  | 110.9                                                                                 | 0.1                     |
| 18       | 16.2                                                                                   | 16.2                                                                                  | 0.0                     |

<sup>a</sup> NMR data measured at 125 MHz in acetone- $d_6$ ; <sup>b</sup> NMR data measured at 100 MHz in acetone- $d_6$ .

## Comparison of $^{13}\text{C}$ NMR spectra of (-)-7 $\alpha$ ,8 $\beta$ -hydroxy-12 $\beta$ -cyclobakuchiol C (**1b**)

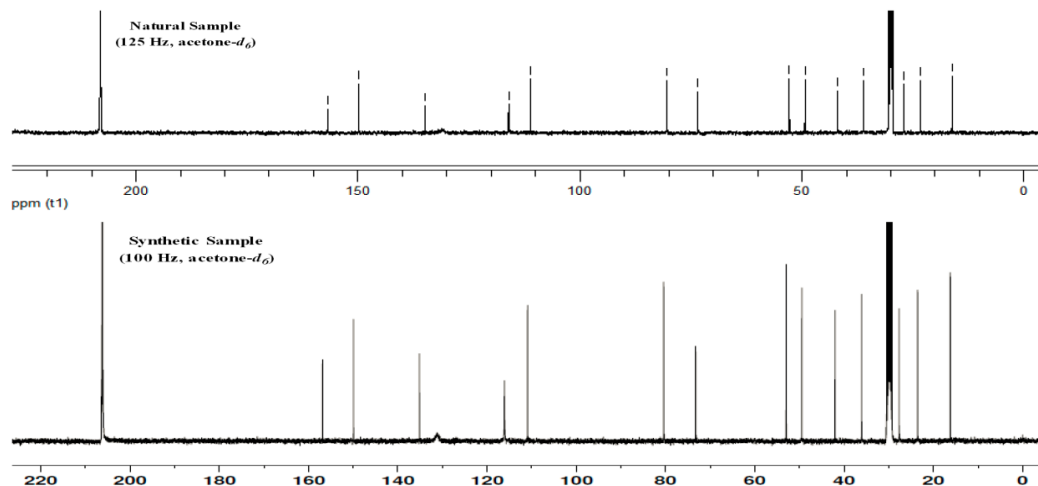

## 3.4 Synthesis of the proposed corypsorior J (**1c**)

### 3.4.1 Synthesis of compound **10**

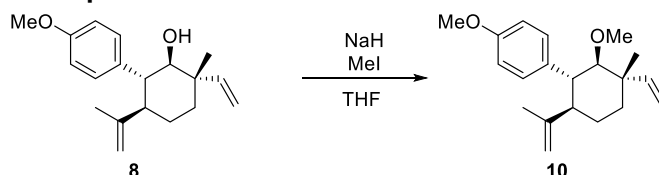

To a suspension solution of alcohol **8** (70.0 mg, 0.24 mmol) and NaH (38.4 mg, 60%, 0.96 mmol) in THF (5.0 mL) was added MeI (60.0  $\mu\text{L}$ , 0.96 mmol). The mixture was stirred at room temperature for 20 h, and quenched with  $\text{H}_2\text{O}$ . The resulting mixture was extracted with ethyl acetate (3 $\times$ 20 mL). The combined extracts were washed with brine, dried over  $\text{Na}_2\text{SO}_4$ , and filtered, and concentrated in vacuo. The crude residue was purified by flash column chromatography (petroleum ether/ethyl acetate = 100:1) on silica gel to give methylether **10** (68.4 mg, 95% yield) as a colorless oil.

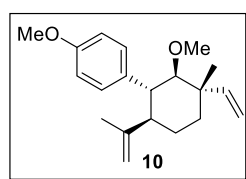

**Compound 10**: Colorless oil;  $[\alpha]_D^{23} = 22.7$  ( $c = 0.5$  in MeOH).

**$^1\text{H}$  NMR** (600 MHz,  $\text{CDCl}_3$ )  $\delta$ : 7.12 (d,  $J = 8.4$  Hz, 2H), 6.79 (d,  $J = 8.4$  Hz, 2H), 5.97 (dd,  $J = 17.4, 10.8$  Hz, 1H), 5.04 (dd,  $J = 17.4, 1.2$  Hz, 1H), 4.98 (dd,  $J = 10.8, 1.2$  Hz, 1H), 4.55 (brs, 1H), 4.53 (brs, 1H), 3.77 (s, 3H), 2.89 (d,  $J = 10.2$  Hz, 1H), 2.70 (t,  $J = 10.8$  Hz, 1H), 2.70 (s, 3H), 2.38 (td,  $J = 11.4, 3.6$  Hz, 1H), 1.69-1.55 (m, 4H), 1.53 (s, 3H), 1.13 (s, 3H);  **$^{13}\text{C}$  NMR** (150 MHz,  $\text{CDCl}_3$ )  $\delta$ : 157.8, 148.3, 147.1, 134.2, 129.5, 113.2, 111.7, 111.0, 90.8, 61.2, 55.0, 50.8, 48.5, 42.2, 35.9, 27.2, 19.3, 16.4. **HRMS** (ESI)  $m/z$  found 323.1981, calculated for  $\text{C}_{20}\text{H}_{28}\text{O}_2\text{Na}$   $[\text{M}+\text{Na}]^+$  323.1982. **MS** (EI)  $m/z$  (%): 300 (65), 255 (20), 179 (42), 164 (100), 121 (46). **IR** (KBr plate)  $\nu_{\text{max}}$ : 3076, 3033, 2970, 2929, 2864, 2830, 1645, 1613, 1512, 1455, 1269, 1247, 1176, 1126, 1038, 911, 888, 818  $\text{cm}^{-1}$ .



### 3.4.2 Synthesis of compound 11

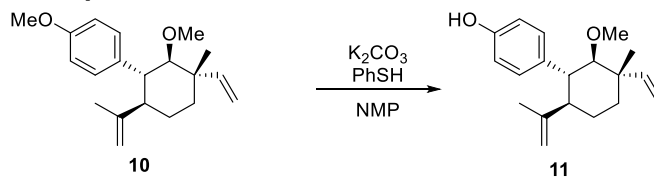

To a suspension solution of methylether **10** (42.0 mg, 0.14 mmol) and  $K_2CO_3$  (8.1 mg, 0.06 mmol) in NMP (2.0 mL) was added PhSH (58.0  $\mu$ L, 0.56 mmol). The mixture was stirred under reflux for 14 h. The reaction was quenched by addition of HCl (1.0 mol/L) and extracted with ethyl acetate (3 $\times$ 10 mL). The combined extracts were washed with brine, dried ( $Na_2SO_4$ ), and concentrated. The crude product was purified by column chromatography on silica gel (petroleum ether/ethyl acetate) to give phenol **11** (37.2 mg, 93% yield).

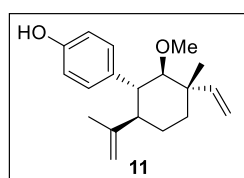

**Compound 11:** White solid;  $[\alpha]_D^{25} = 20.0$  ( $c = 0.5$  in MeOH); **m.p.:** 94.2-95.3  $^{\circ}C$ .

**$^1H$  NMR** (400 MHz,  $CDCl_3$ )  $\delta$ : 7.07 (d,  $J = 8.4$  Hz, 2H), 6.72 (d,  $J = 8.8$  Hz, 2H), 5.96 (dd,  $J = 17.6, 10.8$  Hz, 1H), 5.04 (dd,  $J = 17.6,$

1.2 Hz, 1H), 4.99 (dd,  $J = 10.8, 1.2$  Hz, 1H), 4.95 (s, 1H), 4.54 (brs, 1H), 4.53 (brs, 1H), 2.91 (d,  $J = 10.4$  Hz, 1H), 2.73 (s, 3H), 2.75-2.67 (m, 1H), 2.37 (td,  $J = 11.6, 3.2$  Hz, 1H), 1.71-1.56 (m, 4H), 1.53 (s, 3H), 1.13 (s, 3H);  **$^{13}C$  NMR** (100 MHz,  $CDCl_3$ )  $\delta$ : 153.8, 148.2, 147.0, 134.3, 129.7, 114.8, 111.7, 111.2, 90.9, 61.2, 50.9, 48.5, 42.3, 36.0, 27.2, 19.3, 16.4. **HRMS** (ESI)  $m/z$  found 309.1823, calculated for  $C_{19}H_{26}O_2Na$   $[M+Na]^+$  309.1825. **MS** (EI)  $m/z$  (%): 286 (12), 241 (13), 186 (11), 150 (100), 135 (23), 107 (64). **IR** (KBr plate)  $\nu_{max}$ : 3077, 2973, 2931, 2867, 1644, 1614, 1515, 1449, 1413, 1375, 1225, 1103, 913, 890, 827  $cm^{-1}$ .

### 3.4.3 Synthesis of the proposed corypsoriol J (1c)

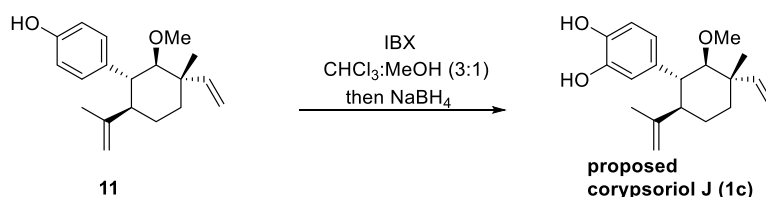

To a solution of phenol **11** (17.0 mg, 0.06 mmol) in  $CHCl_3/MeOH$  (3:1 v/v, 1.2 mL) was added IBX (20.2 mg, 0.07 mmol) at 0  $^{\circ}C$  under an argon atmosphere. A yellow-to-orange color was observed and the mixture was stirred for 2 h, then  $NaBH_4$  (20.5 mg, 0.54 mmol) was added at 0  $^{\circ}C$  under vigorous stirring for 30 min.<sup>11</sup> The reaction was quenched by addition of HCl (1.0 mol/L) and extracted with ethyl acetate (3 $\times$ 10 mL). The combined extracts were washed with brine, dried over  $Na_2SO_4$ , and filtered. The filtrate was

concentrated under reduced pressure, and the residue was purified by column chromatography on silica gel using ethyl acetate-petroleum ether (1:1) to give the proposed corypsoriol J (**1c**) (17.2 mg, 95% yield).

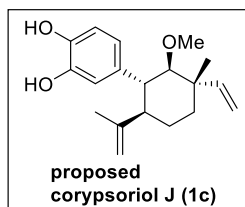

**Proposed corypsoriol J (**1c**):** White solid;  $[\alpha]_D^{25} = 13.3$  ( $c = 0.1$  in MeOH);  $[\text{lit}^{12}, [\alpha]_D^{25} = 30.0$  ( $c = 0.1$  in MeOH)]. **m.p.:** 160-163 °C.

**<sup>1</sup>H NMR** (600 MHz, methanol-*d*<sub>4</sub>)  $\delta$ : 6.65 (brs, 1H), 6.64 (brs, 1H), 6.54 (d,  $J = 7.2$  Hz, 1H), 5.98 (dd,  $J = 17.6, 10.8$  Hz, 1H), 5.04 (dd,  $J = 17.6, 1.2$  Hz, 1H), 4.97 (dd,  $J = 10.8, 1.2$  Hz, 1H), 4.55 (d,  $J =$

1.2 Hz, 1H), 4.50 (d,  $J = 1.2$  Hz, 1H), 3.00 (d,  $J = 10.4$  Hz, 1H), 2.77 (s, 3H), 2.58 (t,  $J = 10.8$  Hz, 1H), 2.38 (td,  $J = 12.0, 3.6$  Hz, 1H), 1.71-1.64 (m, 2H), 1.53 (s, 3H), 1.52-1.49 (m, 2H), 1.11 (s, 3H); **<sup>13</sup>C NMR** (150 MHz, methanol-*d*<sub>4</sub>)  $\delta$ : 149.7, 148.5, 145.7, 144.4, 135.0, 121.4, 115.8, 115.8, 112.3, 111.7, 92.2, 61.7, 52.4, 50.1, 43.4, 37.3, 28.4, 19.7, 16.7.

**HRMS** (ESI)  $m/z$  found 325.1772, calculated for C<sub>19</sub>H<sub>26</sub>O<sub>3</sub>Na [M+Na]<sup>+</sup> 325.1774. **MS** (EI)  $m/z$  (%): 302 (22), 271 (50), 257 (11), 202 (13), 198 (63), 166 (100), 123 (39). **IR** (KBr plate)  $\nu_{\text{max}}$ : 3339, 2972, 2929, 2856, 1642, 1565, 1520, 1444, 1375, 1281, 1194, 1105, 912, 886, 751 cm<sup>-1</sup>.

### Comparison of $^1\text{H}$ NMR data for synthetic and natural corypsoriorol J (1c)

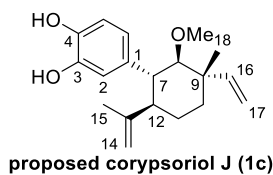

| Position           | Natural corypsoriorol J <sup>a,12</sup> | Synthetic corypsoriorol J <sup>b</sup> | $\Delta\delta$ (ppm) |
|--------------------|-----------------------------------------|----------------------------------------|----------------------|
| 1                  | -                                       | -                                      | -                    |
| 2                  | 6.61 (d, $J = 2.0$ Hz)                  | 6.64, brs                              | -0.03                |
| 3                  | -                                       | -                                      | -                    |
| 4                  | -                                       | -                                      | -                    |
| 5                  | 6.61 (d, $J = 8.0$ Hz)                  | 6.64, brs                              | -0.03                |
| 6                  | 6.50 (dd, $J = 8.0, 2.0$ Hz)            | 6.54, d ( $J = 7.2$ Hz)                | -0.04                |
| 7                  | 2.03 (t, $J = 9.4$ Hz)                  | 2.58, t ( $J = 10.8$ Hz)               | -0.55                |
| 8                  | 3.75 (d, $J = 9.4$ Hz)                  | 3.00, d ( $J = 10.4$ Hz)               | 0.75                 |
| 9                  | -                                       | -                                      | -                    |
| 10 $\alpha$        | 1.70, m                                 | 1.65, m                                | 0.05                 |
| 10 $\beta$         | 1.52, m                                 | 1.52, m                                | 0                    |
| 11 $\alpha$        | 1.92, m                                 | 1.70, m                                | 0.22                 |
| 11 $\beta$         | 1.37, o <sup>c</sup>                    | 1.49, m                                | -0.12                |
| 12                 | 2.30 (td, $J = 9.7, 4.1$ Hz)            | 2.38, td ( $J = 12.0, 3.6$ Hz)         | -0.08                |
| 14                 | 4.14, brs                               | 4.55, d ( $J = 1.2$ Hz)                | -0.41                |
|                    | 4.08, brs                               | 4.50, d ( $J = 1.2$ Hz)                | -0.42                |
| 15                 | 1.36, s                                 | 1.53, s                                | -0.17                |
| 16                 | 6.15 (dd, $J = 18.0, 10.5$ Hz)          | 5.98, dd ( $J = 17.6, 10.9$ Hz)        | 0.17                 |
| 17a                | 5.04 (dd, $J = 10.5, 1.7$ Hz)           | 4.97, dd ( $J = 10.8, 1.2$ Hz)         | 0.07                 |
| 17b                | 5.07 (dd, $J = 18.0, 1.7$ Hz)           | 5.04, dd ( $J = 17.6, 1.2$ Hz)         | 0.03                 |
| 18                 | 1.28, s                                 | 1.11, s                                | -0.17                |
| 8-OCH <sub>3</sub> | 3.00, s                                 | 2.77, s                                | 0.23                 |

<sup>a</sup> NMR data measured at 500 MHz in methanol- $d_4$ ; <sup>b</sup> NMR data measured at 600 MHz in methanol- $d_4$ ; <sup>c</sup>

"o" means overlapped.

## Comparison of $^{13}\text{H}$ NMR data for synthetic and natural corypsoriol J (**1c**)

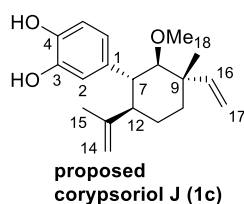

| Position           | Natural corypsoriol J <sup>a,12</sup> | Synthetic corypsoriol J <sup>b</sup> | $\Delta\delta$ (ppm) |
|--------------------|---------------------------------------|--------------------------------------|----------------------|
| 1                  | 134.0                                 | 135.0                                | -0.1                 |
| 2                  | 115.7                                 | 115.8                                | -0.1                 |
| 3                  | 146.1                                 | 143.0                                | 3.1                  |
| 4                  | 146.1                                 | 143.0                                | 3.1                  |
| 5                  | 116.7                                 | 115.8                                | 0.9                  |
| 6                  | 121.5                                 | 121.4                                | -1.4                 |
| 7                  | 59.4                                  | 50.1                                 | 9.3                  |
| 8                  | 88.2                                  | 92.2                                 | -4                   |
| 9                  | 50.1                                  | 43.4                                 | 6.7                  |
| 10                 | 41.1                                  | 37.3                                 | 4.1                  |
| 11                 | 31.7                                  | 28.4                                 | 3.3                  |
| 12                 | 51.3                                  | 52.4                                 | -1.1                 |
| 13                 | 149.2                                 | 148.5                                | 0.7                  |
| 14                 | 110.4                                 | 112.3                                | -1.9                 |
| 15                 | 19.8                                  | 19.7                                 | 0.1                  |
| 16                 | 145.5                                 | 149.7                                | -4.2                 |
| 17                 | 111.9                                 | 111.7                                | 0.2                  |
| 18                 | 28.4                                  | 16.7                                 | 11.7                 |
| 8-OCH <sub>3</sub> | 55.8                                  | 61.7                                 | -5.9                 |

<sup>a</sup> NMR data measured at 125 MHz in methanol- $d_4$ ; <sup>b</sup> NMR data measured at 150 MHz in methanol- $d_4$ .

## 3.5 Synthesis of proposed corypsoriol J's derivatives

### 3.5.1 Synthesis of compound **1c-1**

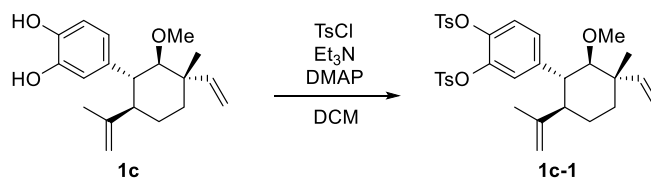

To a suspension solution of the proposed corypsoriol J (**1c**, 13.3 mg, 0.044 mmol), Et<sub>3</sub>N (12.2  $\mu$ L, 0.088 mmol) and DMAP (0.5 mg, 0.0044 mmol) in DCM (5.0 mL) was added TsCl

(16.4 mg, 0.099 mmol) at 0 °C under an argon atmosphere. The mixture was stirred at room temperature for 2 h, and quenched with H<sub>2</sub>O. The resulting mixture was extracted with ethyl acetate (3x20 mL). The combined extracts were washed with brine, dried over Na<sub>2</sub>SO<sub>4</sub>, and filtered, and concentrated in vacuo. The crude residue was purified by flash column chromatography (petroleum ether/ethyl acetate = 50:1) on silica gel to give compound **1c-1** (25.2 mg, 94% yield) as a white foamy solid.

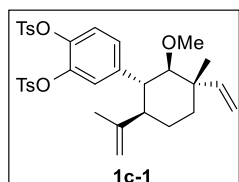

**Compound 1c-1:** White foamy solid;  $[\alpha]_D^{20} = -1.3$  (c = 0.5 in CHCl<sub>3</sub>).

**<sup>1</sup>H NMR** (600 MHz, CDCl<sub>3</sub>)  $\delta$ : 7.58 (d, *J* = 8.4 Hz, 2H), 7.53 (d, *J* = 7.8 Hz, 2H), 7.24 (d, *J* = 8.4 Hz, 2H), 7.19 (d, *J* = 8.4 Hz, 2H), 7.14 (brs, 1H), 7.13 (d, *J* = 8.4 Hz, 1H), 7.03 (dd, *J* = 8.4, 1.8 Hz, 1H),

5.93 (dd, *J* = 18.0, 10.8 Hz, 1H), 5.05 (dd, *J* = 17.4, 1.2 Hz, 1H), 5.01 (dd, *J* = 10.8, 1.2 Hz, 1H), 4.54 (brs, 1H), 4.52 (brs, 1H), 2.89 (d, *J* = 10.2 Hz, 1H), 2.72 (s, 3H), 2.70 (t, *J* = 10.2 Hz, 1H), 2.44 (s, 3H), 2.41 (s, 3H), 2.29 (td, *J* = 11.4, 3.6 Hz, 1H), 1.68-1.61 (m, 1H), 1.60-1.52 (m, 3H), 1.51 (s, 3H), 1.11 (s, 3H); **<sup>13</sup>C NMR** (150 MHz, CDCl<sub>3</sub>)  $\delta$ : 147.7, 146.0, 145.53, 145.50, 143.3, 140.7, 139.1, 132.0, 131.7, 129.6, 129.5, 128.62, 128.57, 123.4, 112.3, 111.6, 90.3, 61.2, 50.9, 49.1, 42.2, 35.7, 26.7, 21.74, 21.70, 19.3, 16.2. **HRMS** (ESI) *m/z* found 633.1963, calculated for C<sub>18</sub>H<sub>24</sub>O<sub>2</sub>Na [M+Na]<sup>+</sup> 633.1961. **MS** (EI) *m/z* (%): 610 (10), 565 (7), 423 (13), 355 (10), 319 (66), 155 (76), 135 (28), 91 (100).

### 3.5.2 Synthesis of compound 1c-2

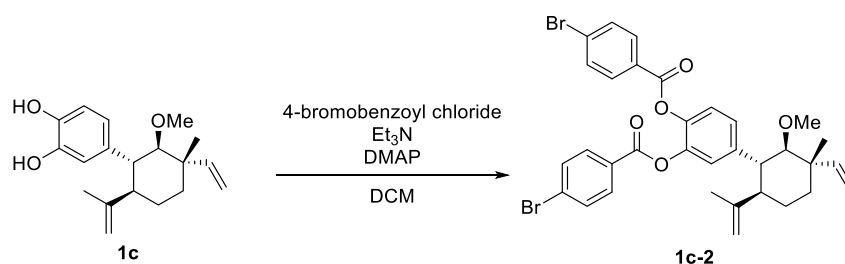

To a suspension solution of the proposed corypsoriol J (**1c**, 20.0 mg, 0.066 mmol), Et<sub>3</sub>N (18.0  $\mu$ L, 0.13 mmol) and DMAP (0.8 mg, 0.007 mmol) in DCM (5.0 mL) was added 4-bromobenzoyl chloride (28.6 mg, 0.13 mmol) at 0 °C under an argon atmosphere. The mixture was stirred at room temperature for 2 h, and quenched with H<sub>2</sub>O. The resulting mixture was extracted with ethyl acetate (3x20 mL). The combined extracts were washed with brine, dried over Na<sub>2</sub>SO<sub>4</sub>, and filtered, and concentrated in vacuo. The crude residue was purified by flash column chromatography (petroleum ether/ethyl acetate = 50:1) on silica gel to give compound **1c-2** (41.0 mg, 93% yield) as a white foamy solid.

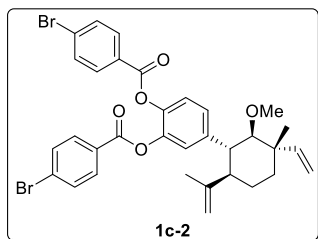

**Compound 1c-2:** White foamy solid;  $[\alpha]_D^{20} = 14.5$  ( $c = 0.5$  in  $\text{CHCl}_3$ ).

**$^1\text{H NMR}$**  (600 MHz,  $\text{CDCl}_3$ )  $\delta$ : 7.90 (d,  $J = 8.4$  Hz, 2H), 7.88 (d,  $J = 8.4$  Hz, 2H), 7.54 (d,  $J = 4.8$  Hz, 2H), 7.53 (d,  $J = 4.8$  Hz, 2H), 7.27 (d,  $J = 7.8$  Hz, 1H), 7.25 (d,  $J = 1.8$  Hz, 1H),

7.19 (dd,  $J = 8.4, 1.8$  Hz, 1H), 5.97 (dd,  $J = 18.0, 10.8$  Hz, 1H), 5.05 (dd,  $J = 17.4, 1.2$  Hz, 1H), 5.00 (dd,  $J = 10.8, 1.2$  Hz, 1H), 4.63 (brs, 1H), 4.61 (brs, 1H), 2.96 (d,  $J = 10.2$  Hz, 1H), 2.85 (s, 3H), 2.83 (t,  $J = 10.8$  Hz, 1H), 2.42 (td,  $J = 12.0, 3.6$  Hz, 1H), 1.73-1.67 (m, 1H), 1.64-1.54 (m, 3H), 1.58 (s, 3H), 1.15 (s, 3H);  **$^{13}\text{C NMR}$**  (150 MHz,  $\text{CDCl}_3$ )  $\delta$ : 163.5, 147.9, 146.2, 141.7, 140.3, 131.9, 131.47, 131.45, 129.0, 127.8, 122.5, 122.4, 111.4, 90.6, 61.4, 50.6, 49.1, 42.3, 35.8, 27.1, 19.5, 16.4. **HRMS** (ESI)  $m/z$  found 691.0484, calculated for  $\text{C}_{18}\text{H}_{24}\text{O}_2\text{Na}$   $[\text{M}+\text{Na}]^+$  691.0488. **MS** (EI)  $m/z$  (%): 668 (2), 532 (8), 183 (100), 179 (20), 157 (12), 147 (9), 104 (8), 93 (6), 68 (6).

### 3.5.3 Synthesis of compound 1c-3

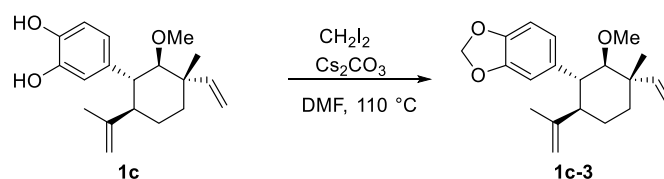

To a suspension solution of the proposed corypsoriol J (**1c**, 12.0 mg, 0.04 mmol) and  $\text{Cs}_2\text{CO}_3$  (19.6 mg, 0.06 mmol) in DMF (2.0 mL) was added  $\text{CH}_2\text{I}_2$  (4.8  $\mu\text{L}$ , 0.06 mmol) at room temperature. The mixture was stirred at 110  $^\circ\text{C}$  for 20 h, and quenched with  $\text{H}_2\text{O}$  at room temperature. The resulting mixture was extracted with ethyl acetate (3 $\times$ 20 mL). The combined extracts were washed with brine, dried over  $\text{Na}_2\text{SO}_4$ , and filtered, and concentrated in vacuo. The crude residue was purified by flash column chromatography (petroleum ether/ethyl acetate = 20:1) on silica gel to give compound **1c-3** (8.2 mg, 65% yield) as a colorless oil.

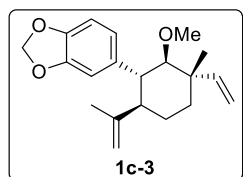

**Compound 1c-3:** Colorless oil;  $[\alpha]_D^{20} = 0.8$  ( $c = 0.5$  in  $\text{CHCl}_3$ ).

**$^1\text{H NMR}$**  (600 MHz,  $\text{CDCl}_3$ )  $\delta$ : 6.72 (brs, 1H), 6.71 (d,  $J = 8.4$  Hz, 1H), 6.66 (d,  $J = 7.8$  Hz, 1H), 5.96 (dd,  $J = 18.0, 10.8$  Hz, 1H), 5.91 (s, 2H), 5.04 (d,  $J = 17.4$  Hz, 1H), 4.97 (d,  $J = 10.8$  Hz, 1H), 4.55 (brs, 2H), 2.89 (d,  $J = 10.2$  Hz, 1H), 2.78 (s, 3H), 2.68 (t,  $J = 11.4$  Hz, 1H), 2.33 (td,  $J = 12.0, 3.6$  Hz, 1H), 1.69-1.59 (m, 2H), 1.57-1.52 (m, 2H), 1.55 (s, 3H), 1.12 (s, 3H);  **$^{13}\text{C NMR}$**  (150 MHz,  $\text{CDCl}_3$ )  $\delta$ : 148.2, 147.2, 146.9, 145.6, 136.2, 122.1, 111.8, 111.2, 108.7, 107.7, 100.7,

90.7, 61.3, 51.0, 49.2, 42.3, 35.9, 27.2, 19.3, 16.4. **HRMS** (ESI)  $m/z$  found 337.1772,

calculated for C<sub>18</sub>H<sub>24</sub>O<sub>2</sub>Na [M+Na]<sup>+</sup> 337.1774. **MS** (EI) m/z (%): 314 (34), 178 (90), 149 (69), 135 (49), 105 (41), 84 (100), 57 (77).

## 4. Total synthesis of 7β-aryl-12β-alkyl type meroterpenoid

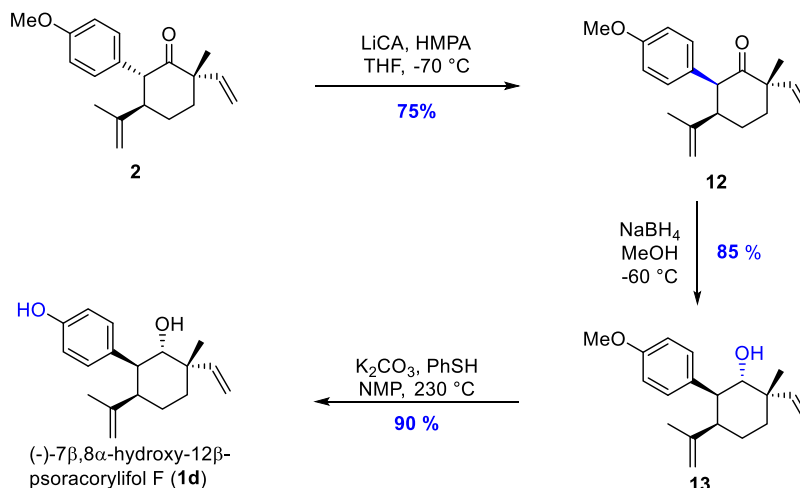

**Scheme S3** Total synthesis of (-)-7β,8α-hydroxy-12β-psoracorylifol F.

### 4.1 Synthesis of natural (-)-7β,8α-hydroxy-12β-psoracorylifol F (1d)

#### 4.1.1 Synthesis of compound 12

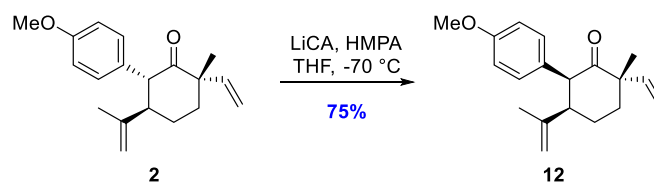

Under an argon atmosphere, to a solution of the precursor **2** (5.0 mg, 0.018 mmol) in THF (1.0 mL) was added lithium isopropylcyclohexylamide (LiCA, 0.5 mL, 0.09 mmol, 5.0 equiv.) and hexamethylphosphoramide (HMPA, 31.1 μL, 0.18 mmol, 10.0 equiv.) at -70 °C and the resulting mixture was stirred for 2 h at the same temperature. The reaction mixture was added silica gel (400 mg) and stirred for 30 min. The crude reaction mixture was filtrated through celite and washed with ethyl acetate, then concentrated under vacuum. The crude product was purified by flash column chromatography to give the desired *cis*-product **12** (3.75 mg, 75% yield) as a colorless oil along with the starting material **2** (0.5 mg, 10% yield). The yield based on the recover starting material is 83% yield.

Table S6 Optimization of the enolization/protonation conditions<sup>a</sup>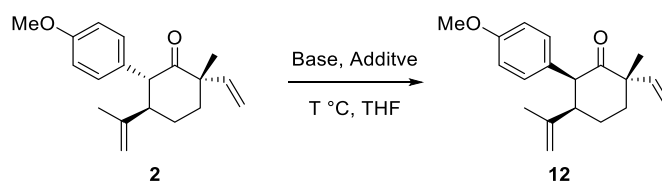

| Entry          | Base (equiv.)        | Additive    | Temp.           | Yield <sup>c</sup> | Remark                                       |
|----------------|----------------------|-------------|-----------------|--------------------|----------------------------------------------|
| 1 <sup>b</sup> | KOH (2.0)            | --          | rt to 70 °C     | NR                 | Quenched by aq. NH <sub>4</sub> Cl           |
| 2 <sup>b</sup> | NaOH (2.0)           | --          | rt to 70 °C     | NR                 | Quenched by aq. NH <sub>4</sub> Cl           |
| 3              | LDA (2.0)            | --          | -78 °C to rt    | NR                 | Quenched by aq. NH <sub>4</sub> Cl           |
| 4              | NaH (2.0)            | --          | 0 °C to 20 °C   | 29%                | Quenched by cold aq. NH <sub>4</sub> Cl      |
| 5              | NaH (5.0)            | --          | 0 °C to 20 °C   | 30%                | Quenched by cold aq. NH <sub>4</sub> Cl      |
| 6              | NaH (5.0)            | --          | 100 °C          | 33%                | Quenched by cold aq. NH <sub>4</sub> Cl      |
| 7              | LiHMDS (2.0)         | --          | -78 °C to 20 °C | 30%                | Quenched by cold aq. NH <sub>4</sub> Cl      |
| 8              | LiHMDS (4.0)         | --          | -78 °C to 20 °C | 50%                | Quenched by cold aq. NH <sub>4</sub> Cl      |
| 9              | LiCA (5.0)           | --          | -70 to 0 °C     | NR                 | Quenched by aq. NH <sub>4</sub> Cl           |
| 10             | LTMP (5.0)           | --          | -70 to 0 °C     | ND                 | Quenched by silica gel in 0 °C               |
| 11             | LiCA (5.0)           | HMPA        | -70 °C          | 40%                | Quenched by aq. NH <sub>4</sub> Cl in -70 °C |
| 12             | LiCA (5.0)           | HMPA        | -70 °C          | 71%                | Quenched by silica gel in -40 °C             |
| <b>13</b>      | <b>LiCA (5.0)</b>    | <b>HMPA</b> | <b>-70 °C</b>   | <b>75%</b>         | <b>Quenched by silica gel in -70 °C</b>      |
| 14             | LiCA (5.0)           | HMPA        | -70 °C          | 59%                | Quenched by silica gel in -110 °C            |
| 15             | LTMP (5.0)           | HMPA        | -70 °C          | 25%                | Quenched by silica gel in -70 °C             |
| 16             | <i>t</i> -BuLi (5.0) | HMPA        | -70 °C          | 26%                | Quenched by silica gel in -70 °C             |
| 17             | <i>t</i> -BuLi (5.0) | HMPA        | -70 °C          | 45%                | Quenched by silica gel in -110 °C            |

<sup>a</sup>The reactions were performed using precursor **2** (0.018 mmol), base (5.0 equiv.), additive (10.0 equiv.) in 1.0 mL THF; <sup>b</sup> MeOH as solvent; <sup>c</sup> Isolated yield; rt = Room temperature; THF = Tetrahydrofuran; HMPA = Hexamethylphosphoramide; LDA = Lithium diisopropylamide; LiHMDS = Lithium bis(trimethylsilyl)amide; LiCA = lithium cyclohexylisopropylamide; LTMP = 2,2,6,6-tetramethylpiperidyl-lithium; NR = No reaction; ND = No detected.

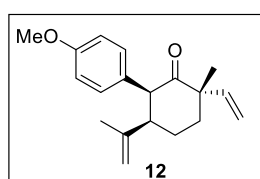

**Compound 12:** Colorless oil;  $[\alpha]_D^{23} = -78.8$  ( $c = 0.5$  in MeOH).

**<sup>1</sup>H NMR** (600 MHz, CDCl<sub>3</sub>)  $\delta$ : 7.19 (d,  $J = 8.4$  Hz, 2H), 6.81 (d,  $J = 9.0$  Hz, 2H), 6.03 (dd,  $J = 18.0, 10.8$  Hz, 1H), 5.19 (d,  $J = 10.2$  Hz, 1H), 5.13 (d,  $J = 18.0$  Hz, 1H), 4.96, (brs, 1H), 4.60, (brs, 1H),

4.15 (d,  $J = 5.4$  Hz, 1H), 3.78 (s, 3H), 3.08 (dd,  $J = 9.0, 4.8$  Hz, 1H), 2.43-2.18 (m, 1H), 2.92-1.93 (m, 2H), 1.91-1.87 (m, 1H), 1.70 (s, 3H), 1.18 (s, 3H); **<sup>13</sup>C NMR** (150 MHz, CDCl<sub>3</sub>)



$\delta$ : 211.9, 158.0, 143.9, 143.5, 130.7, 129.1, 115.1, 114.3, 113.0, 55.2, 54.8, 52.2, 49.2, 34.9, 26.1, 24.9, 24.0. **HRMS** (ESI)  $m/z$  found 307.1668, calculated for  $C_{18}H_{24}O_2Na$   $[M+Na]^+$  307.1669. **MS** (EI)  $m/z$  (%): 284 (13), 216 (16), 173 (26), 160 (46), 134 (24), 121 (100). **IR** (KBr plate)  $\nu_{max}$ : 3447, 2955, 2926, 2853, 1696, 1609, 1512, 1416, 1375, 1296, 1253, 1184, 1035, 1008, 918, 892, 829  $cm^{-1}$ .

#### 4.1.2 Synthesis of compound 13

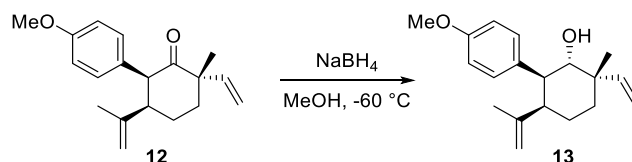

To a solution of compound **12** (25.0 mg, 0.09 mmol) in methanol (2.0 mL) was added  $NaBH_4$  (34.2 mg, 0.9 mmol) at  $-60\text{ }^\circ\text{C}$  under an argon atmosphere. The mixture was stirred for 1 h. When the reaction completed (monitored by TLC), 10.0 mL of water were added and then stirred for another 1 h. The methanol of mixture was removed under the reduce pressure, and the resulting aqueous layer was extracted with ethyl acetate (3 $\times$ 20 mL). The combined organic phase was washed with brine, dried over  $Na_2SO_4$ , and filtered. The filtrate was concentrated under reduced pressure, and the resulting crude product (dr > 20:1) was purified by column chromatography on silica gel using petroleum ether-ethyl acetate (5:1) to afford compound **13** (21.9 mg, 85% yield).

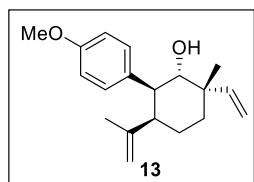

**Compound 13**: Colorless oil;  $[\alpha]_D^{21} = -62.7$  ( $c = 1.0$  in MeOH).

**$^1H$  NMR** (400 MHz,  $CDCl_3$ )  $\delta$ : 7.67 (d,  $J = 8.8$  Hz, 2H), 6.80 (d,  $J = 8.8$  Hz, 2H), 5.85 (dd,  $J = 17.6, 10.8$  Hz, 1H), 5.04 (dd,  $J = 10.8, 0.8$  Hz, 1H), 4.99 (dd,  $J = 17.6, 0.8$  Hz, 1H), 4.93 (brs, 1H), 4.92 (brs, 1H), 3.79 (s, 3H), 3.66 (s, 1H), 2.88 (brs, 1H), 2.55 (dd,  $J = 12.4, 3.2$  Hz, 1H), 2.26-2.15 (m, 1H), 2.09-2.03 (m, 1H), 1.75 (s, 3H), 1.70-1.66 (m, 2H), 0.65 (s, 3H);  **$^{13}C$  NMR** (100 MHz,  $CDCl_3$ )  $\delta$ : 158.5, 148.2, 146.1, 132.8, 130.3, 113.8, 112.33, 112.25, 83.4, 77.6, 55.0, 53.8, 42.4, 36.1, 25.4, 25.0, 15.5. **HRMS** (ESI)  $m/z$  found 309.1824, calculated for  $C_{18}H_{24}O_2Na$   $[M+Na]^+$  309.1825. **MS** (EI)  $m/z$  (%): 286 (1), 189 (10), 166 (33), 135 (100), 108 (15), 77 (11), 55 (7). **IR** (KBr plate)  $\nu_{max}$ : 3478, 2959, 2925, 2855, 1611, 1514, 1460, 1414, 1255, 1184, 1086, 1035, 901, 827, 803  $cm^{-1}$ .

#### 4.1.3 Synthesis of natural (-)-7 $\beta$ ,8 $\alpha$ -hydroxy-12 $\beta$ -psoracorylifol F (**1d**)

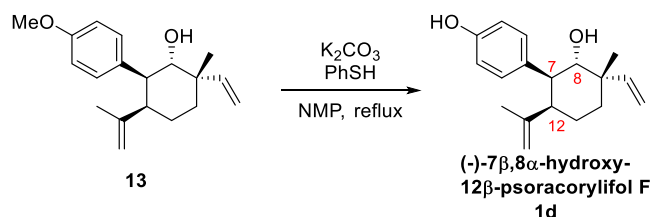

To a suspension solution of compound **13** (7.0 mg, 0.025 mmol) and K<sub>2</sub>CO<sub>3</sub> (1.4 mg, 0.01 mmol) in NMP (1.0 mL) was added PhSH (12.6  $\mu$ L, 0.12 mmol). The mixture was stirred under reflux for 14 h. The reaction was quenched by addition of HCl (1.0 mol/L) and extracted with ethyl acetate (3 $\times$ 10 mL). The combined extracts were washed with brine, dried (Na<sub>2</sub>SO<sub>4</sub>), and concentrated. The resulting crude product was purified by flash column chromatography on silica gel (petroleum ether/ethyl acetate, 10:1-2:1) to give (-)-7 $\beta$ ,8 $\alpha$ -hydroxy-12 $\beta$ -psoracorylifol F (**1d**) (6.3 mg, 93% yield).

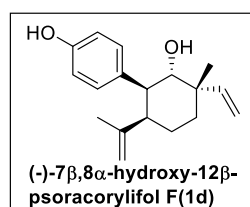

**(-)-7 $\beta$ ,8 $\alpha$ -hydroxy-12 $\beta$ -psoracorylifol F (**1d**):** White solid;  $[\alpha]_D^{25} = -32.0$  ( $c = 0.1$  in MeOH),  $[\text{lit}^{10}, [\alpha]_D^{25} = -15.1$  ( $c = 0.1$  in MeOH)]. **m.p.:** 164-167 °C.

**<sup>1</sup>H NMR** (600 MHz, acetone-*d*<sub>6</sub>)  $\delta$ : 8.02 (s, 1H), 7.02 (d,  $J = 8.4$  Hz, 2H), 6.70 (d,  $J = 8.4$  Hz, 2H), 6.33 (dd,  $J = 18.0, 11.4$  Hz, 1H), 5.18 (dd,  $J = 5.4, 1.2$  Hz, 1H), 5.15 (dd,  $J = 12.0, 1.2$  Hz, 1H), 4.49 (brs, 1H), 4.42 (brs, 1H), 3.43 (dd,  $J = 10.2, 4.8$  Hz, 1H), 2.94 (s, 1H), 2.78 (s, 1H), 2.73 (d,  $J = 4.2$  Hz, 1H), 2.55 (t,  $J = 11.4$  Hz, 1H), 2.44 (td,  $J = 12.0, 4.2$  Hz, 1H), 1.94-1.92 (m, 1H), 1.78-1.75 (m, 1H), 1.55-1.53 (m, 1H), 1.46 (s, 3H), 1.43-1.41 (m, 1H), 1.13 (s, 3H); **<sup>13</sup>C NMR** (150 MHz, acetone-*d*<sub>6</sub>)  $\delta$ : 156.6, 148.7, 142.8, 133.7, 130.6, 115.8, 113.9, 111.8, 81.6, 52.4, 51.7, 43.1, 36.9, 29.7, 29.6, 19.8. **HRMS** (ESI)  $m/z$  found 295.1671, calculated for C<sub>18</sub>H<sub>24</sub>O<sub>2</sub>Na [M+Na]<sup>+</sup> 295.1669. **MS** (EI)  $m/z$  (%): 272 (22), 136 (100), 123 (18), 107 (94), 81 (13), 68 (18). **IR** (KBr plate)  $\nu_{\text{max}}$ : 3444, 2923, 2852, 1514, 1461, 1376, 1229, 1015, 914, 819, 720 cm<sup>-1</sup>.

Comparison of  $^1\text{H}$  NMR data of synthetic and natural (-)-7 $\beta$ ,8 $\alpha$ -hydroxy-12 $\beta$ -psoracorylifol F (1d)

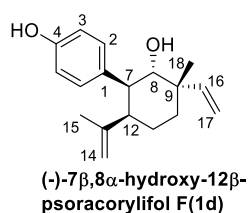

| Position         | Natural<br>7 $\beta$ ,8 $\alpha$ -hydroxy-12 $\beta$ -psoracorylifol F <sup>a,10</sup> | Synthetic<br>7 $\beta$ ,8 $\alpha$ -hydroxy-12 $\beta$ -psoracorylifol F <sup>b</sup> | $\Delta\delta$<br>(ppm) |
|------------------|----------------------------------------------------------------------------------------|---------------------------------------------------------------------------------------|-------------------------|
| 1                | -                                                                                      | -                                                                                     | -                       |
| 2,6              | 7.02, d ( $J$ = 8.5 Hz)                                                                | 7.02, d ( $J$ = 8.4 Hz)                                                               | 0.00                    |
| 3,5              | 6.70, d ( $J$ = 8.5 Hz)                                                                | 6.70, d ( $J$ = 8.4 Hz)                                                               | 0.00                    |
| 4                | -                                                                                      | -                                                                                     | -                       |
| 7                | 2.55, t ( $J$ = 11.5 Hz)                                                               | 2.55, t ( $J$ = 11.4 Hz)                                                              | 0.00                    |
| 8                | 3.43, d ( $J$ = 10.0 Hz)                                                               | 3.43, dd ( $J$ = 10.2, 4.8 Hz)                                                        | 0.00                    |
| 9                | -                                                                                      | -                                                                                     | -                       |
| 10 <sub>ax</sub> | 1.93, m                                                                                | 1.95-1.92, m (1.93, m)                                                                | 0.00                    |
| 10 <sub>eq</sub> | 1.54, m                                                                                | 1.55-1.53, m (1.54, m)                                                                | 0.00                    |
| 11 <sub>ax</sub> | 1.76, m                                                                                | 1.78-1.75, m (1.77, m)                                                                | -0.01                   |
| 11 <sub>eq</sub> | 1.41, m                                                                                | 1.43-1.41, m (1.42, m)                                                                | -0.01                   |
| 12               | 2.44, td ( $J$ = 12.0, 4.0 Hz)                                                         | 2.44, td ( $J$ = 12.0, 4.2 Hz)                                                        | 0.00                    |
| 13               | -                                                                                      | -                                                                                     | -                       |
| 14 <sub>ax</sub> | 4.49, brs                                                                              | 4.49 (brs)                                                                            | 0.00                    |
| 14 <sub>eq</sub> | 4.41, brs                                                                              | 4.42 (brs)                                                                            | -0.01                   |
| 15               | 1.46, s                                                                                | 1.46 (s)                                                                              | 0.00                    |
| 16               | 6.33, dd ( $J$ = 16.0, 11.0 Hz)                                                        | 6.33, dd ( $J$ = 18.0, 11.4 Hz)                                                       | 0.00                    |
| 17 <sub>ax</sub> | 5.18, dd ( $J$ = 4.0, 1.4 Hz)                                                          | 5.18, dd ( $J$ = 5.4, 1.2 Hz)                                                         | 0.00                    |
| 17 <sub>eq</sub> | 5.15, dd ( $J$ = 10.5, 1.5 Hz)                                                         | 5.15, dd ( $J$ = 12.0, 1.2 Hz)                                                        | 0.00                    |
| 18               | 1.13, s                                                                                | 1.13 (s)                                                                              | 0.00                    |

<sup>a</sup> NMR data measured at 500 MHz in acetone- $d_6$ ; <sup>b</sup> NMR data measured at 600 MHz in acetone- $d_6$ .

Comparison of  $^1\text{H}$  NMR spectra of (-)-7 $\beta$ ,8 $\alpha$ -hydroxy-12 $\beta$ -psoracorylifol F (1d)

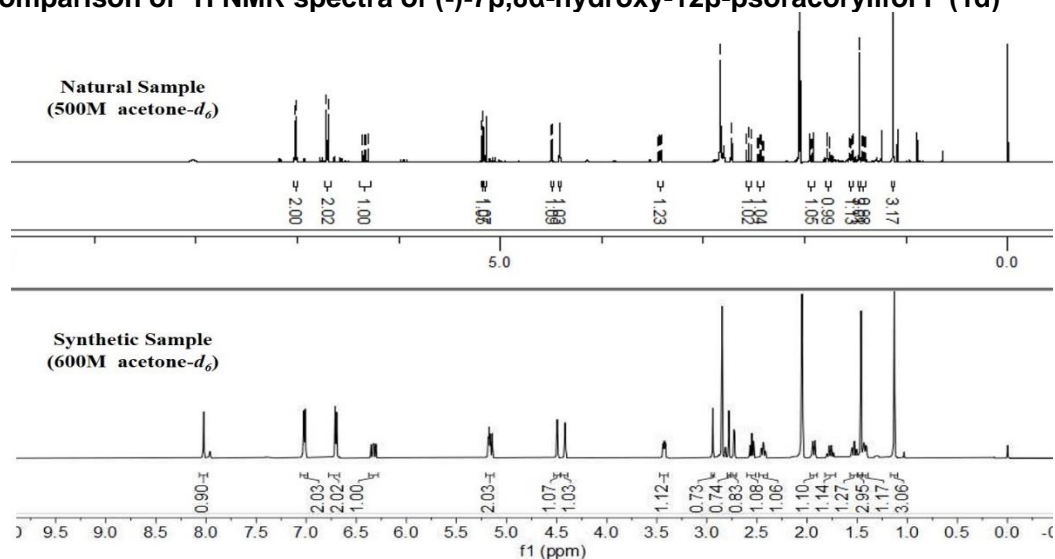

Comparison of  $^{13}\text{C}$  NMR data of synthetic and natural (-)-7 $\beta$ ,8 $\alpha$ -hydroxy-12 $\beta$ -psoracorylifol F (1d)

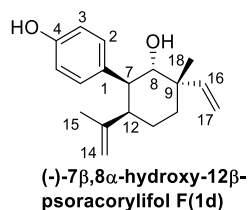

| Position | Natural<br>7 $\beta$ ,8 $\alpha$ -hydroxy-12 $\beta$ -psoracorylifol F <sup>a,10</sup> | Synthetic<br>7 $\beta$ ,8 $\alpha$ -hydroxy-12 $\beta$ -psoracorylifol F <sup>b</sup> | $\Delta\delta$<br>(ppm) |
|----------|----------------------------------------------------------------------------------------|---------------------------------------------------------------------------------------|-------------------------|
| 1        | 133.7                                                                                  | 133.7                                                                                 | 0.0                     |
| 2,6      | 130.6                                                                                  | 130.6                                                                                 | 0.0                     |
| 3,5      | 115.8                                                                                  | 115.8                                                                                 | 0.0                     |
| 4        | 156.5                                                                                  | 156.6                                                                                 | -0.1                    |
| 7        | 51.7                                                                                   | 51.7                                                                                  | 0.0                     |
| 8        | 81.6                                                                                   | 81.6                                                                                  | 0.0                     |
| 9        | 43.0                                                                                   | 43.1                                                                                  | -0.1                    |
| 10       | 36.9                                                                                   | 36.9                                                                                  | 0.0                     |
| 11       | 28.8                                                                                   | 28.8                                                                                  | 0.0                     |
| 12       | 52.4                                                                                   | 52.4                                                                                  | 0.0                     |
| 13       | 148.7                                                                                  | 148.7                                                                                 | 0.0                     |
| 14       | 111.8                                                                                  | 111.9                                                                                 | -0.1                    |
| 15       | 19.8                                                                                   | 19.8                                                                                  | 0.0                     |
| 16       | 142.8                                                                                  | 142.8                                                                                 | 0.0                     |
| 17       | 113.9                                                                                  | 113.9                                                                                 | 0.0                     |
| 18       | 28.9                                                                                   | 28.9                                                                                  | 0.0                     |

<sup>a</sup> NMR data measured at 125 MHz in acetone- $d_6$ ; <sup>b</sup> NMR data measured at 150 MHz in acetone- $d_6$ .

Comparison of  $^{13}\text{C}$  NMR spectra of (-)-7 $\beta$ ,8 $\alpha$ -hydroxy-12 $\beta$ -psoracorylifol F (1d)

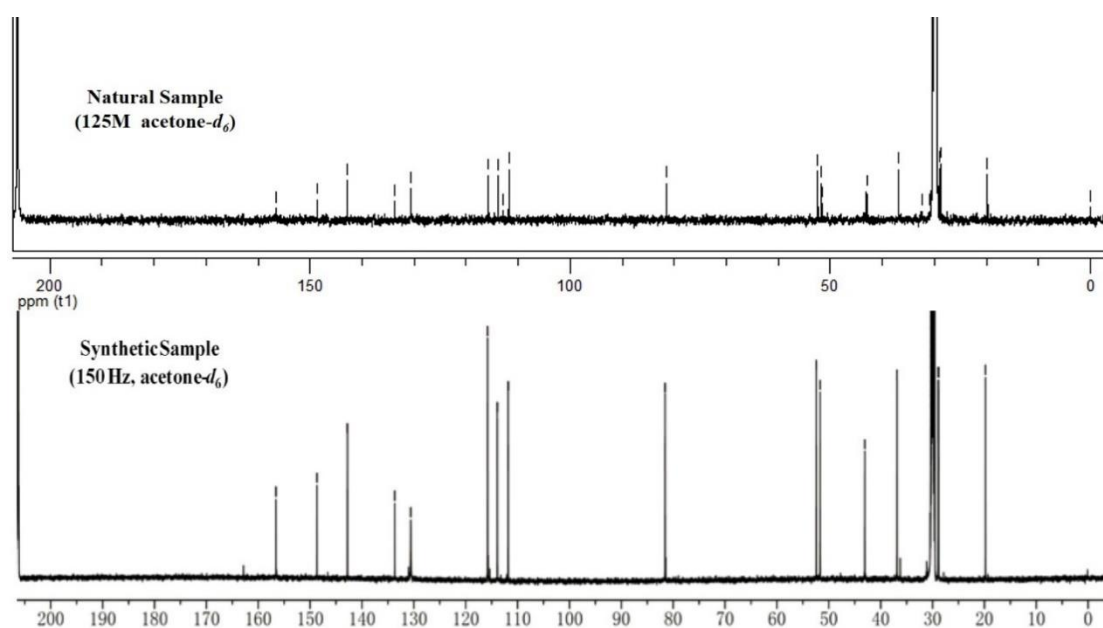

## 5. Collective total syntheses of 7 $\beta$ -aryl-12 $\alpha$ -alkyl type meroterpenoids

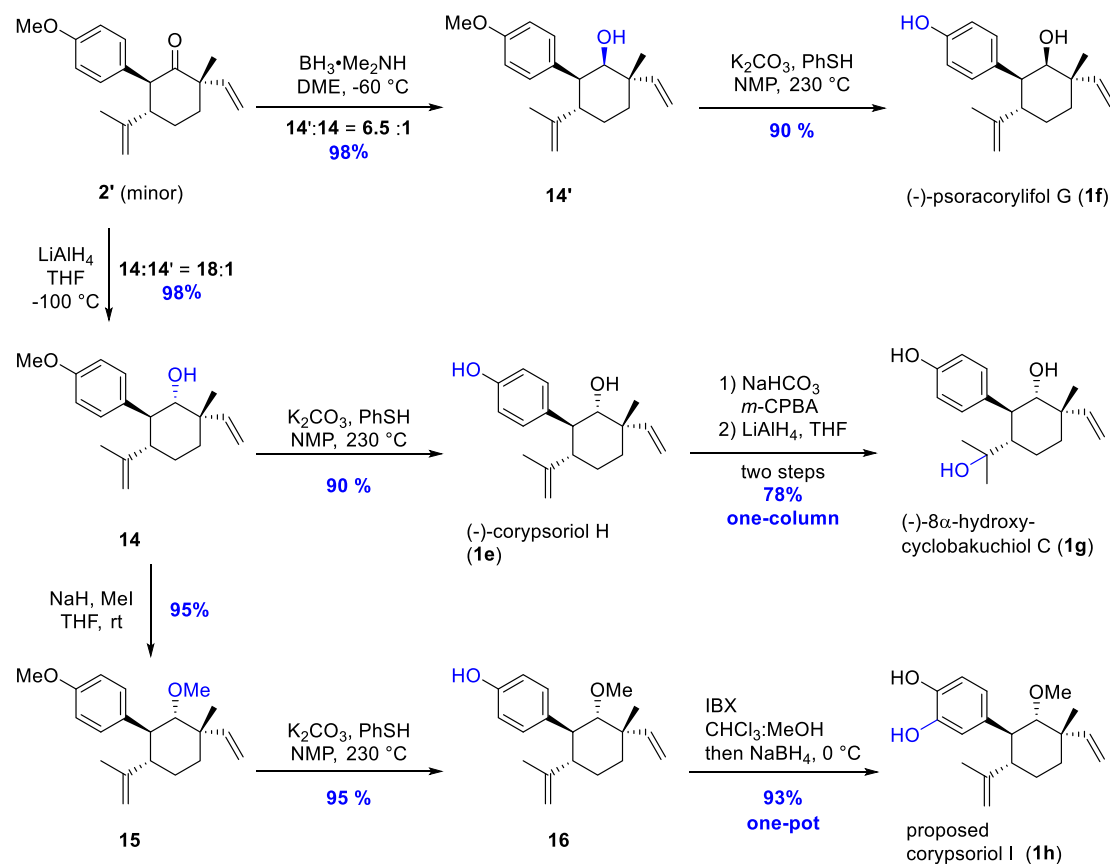

**Scheme S4** Collective total syntheses of 7 $\beta$ -aryl-12 $\alpha$ -alkyl type meroterpenoids.

### 5.1 Synthesis of natural (-)-corypsoriol H (**1e**)

#### 5.1.1 Synthesis of compounds **14** and **14'**

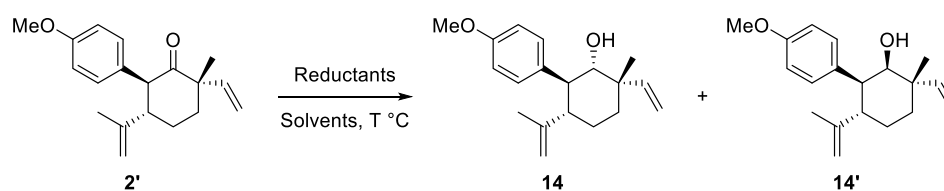

#### Method:

To a solution of the precursor **2'** (5.0 mg, 0.018 mmol) in THF (1.0 mL) was added reductants (0.09 mmol, 5.0 equiv.) under an argon atmosphere at the noted temperature, respectively, and the mixture was stirred. When the reaction completed (monitored by TLC), the reaction mixture was quenched with a saturated aqueous solution of  $\text{NH}_4\text{Cl}$ , and was extracted with  $\text{CH}_2\text{Cl}_2$  (3 $\times$ 20 mL). The combined organic phase was washed with brine, dried over  $\text{Na}_2\text{SO}_4$ , and filtered. The filtrate was concentrated under reduced pressure, and the dr value was measured by  $^1\text{H}$  NMR (entries 1-24, Table S7 and entries 1-11, Table S8).

## 5.1.2 The optimization of the reduction of precursor 2'

### 5.1.2.1 The screening of reductants

Table S7. The screening of reductants<sup>a</sup>

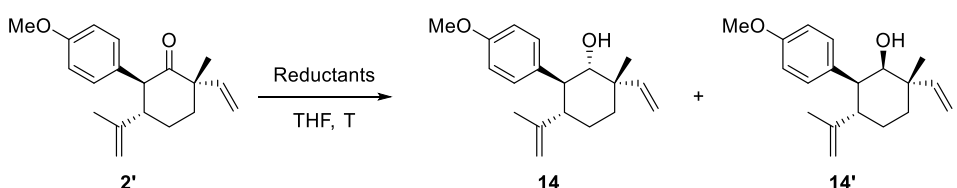

| Entry     | Reductants                             | Solvents   | Temp.         | dr ( <b>14:14'</b> ) | Yield <sup>b</sup> |
|-----------|----------------------------------------|------------|---------------|----------------------|--------------------|
| 1         | BH <sub>3</sub>                        | THF        | rt            | --                   | Decompose          |
| 2         | BH <sub>3</sub> ·Me <sub>2</sub> S     | THF        | -70 °C        | 1:1                  | 38%                |
| 3         | BH <sub>3</sub> ·Me <sub>2</sub> S     | THF        | 80 °C         | --                   | ND                 |
| <b>4</b>  | <b>BH<sub>3</sub>·Me<sub>2</sub>NH</b> | <b>THF</b> | <b>-70 °C</b> | <b>1:4</b>           | <b>97%</b>         |
| 5         | BH <sub>3</sub> ·Me <sub>2</sub> NH    | THF        | 80 °C         | 1:3.6                | 92%                |
| 6         | BH <sub>3</sub> ·Pyr                   | THF        | rt            | 1.5:1                | 38%                |
| 7         | NaBH <sub>4</sub>                      | THF        | -70 °C        | 2.7:1                | 92%                |
| 8         | NaBH <sub>4</sub>                      | THF        | 80 °C         | 2:1                  | 95%                |
| 9         | LiBH <sub>4</sub>                      | THF        | rt            | 3:1                  | 94%                |
| 10        | ZnBH <sub>4</sub>                      | THF        | rt            | 1.5:1                | 95%                |
| 11        | 9-BBN                                  | THF        | -70 °C to rt  | --                   | NR                 |
| 12        | 9-BBN                                  | THF        | 80 °C         | --                   | ND                 |
| 13        | Red-Al                                 | THF        | -70 °C to rt  | 1:1                  | 50%                |
| 14        | Red-Al                                 | THF        | 80 °C         | 1.4:1                | 85%                |
| 15        | DIBAL-H                                | THF        | -70 °C to rt  | --                   | NR                 |
| 16        | DIBAL-H                                | THF        | 80 °C         | 1:2                  | 90%                |
| 17        | Al(O <sup>i</sup> Pr) <sub>3</sub>     | THF        | rt            | --                   | NR                 |
| <b>18</b> | <b>LiAlH<sub>4</sub></b>               | <b>THF</b> | <b>-70 °C</b> | <b>12.5:1</b>        | <b>96%</b>         |
| 19        | LiAlH <sub>4</sub>                     | THF        | 80 °C         | 7.9:1                | 95%                |
| 20        | <i>L</i> -Selectride                   | THF        | -70 °C to rt  | --                   | NR                 |
| 21        | <i>L</i> -Selectride                   | THF        | 80 °C         | 1:3                  | trace              |
| 22        | <i>K</i> -Selectride                   | THF        | -70 °C to rt  | --                   | NR                 |
| 23        | <i>K</i> -Selectride                   | THF        | 80 °C         | --                   | ND                 |
| 24        | ( <i>R</i> )-CBS, BH <sub>3</sub>      | THF        | -40 °C        | --                   | ND                 |

<sup>a</sup>The reactions were performed using precursor **2'** (0.018 mmol), reductants (5.0 equiv.) in 1.0 mL THF;

<sup>b</sup>Isolated yield. NR = No reaction; ND = No detected; 9-BBN = 9-Borabicyclo[3.3.1]nonane; Red-Al = Sodium bis(2-methoxyethoxy)aluminiumhydride; DIBAL-H = Diisobutylaluminium hydride; *L*-Selectride = Lithium triisobutylhydroborate; *K*-Selectride = Potassium *tri*-*sec*-butylborohydride;

### 5.1.2.2 The screening of solvents and temperature

Table S8. The screening of solvents and temperature<sup>a</sup>

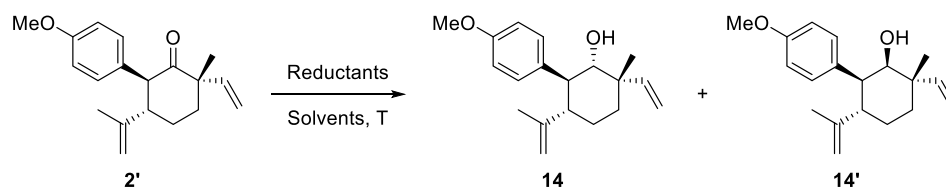

| Entry     | Reductants                                    | Solvents               | Temp.          | dr ( <b>14</b> : <b>14'</b> ) | Yield <sup>b</sup> |
|-----------|-----------------------------------------------|------------------------|----------------|-------------------------------|--------------------|
| 1         | BH <sub>3</sub> ·Me <sub>2</sub> NH           | Et <sub>2</sub> O      | rt             | 1:4                           | 93%                |
| 2         | BH <sub>3</sub> ·Me <sub>2</sub> NH           | 1,4-dioxane            | rt             | 1:5                           | 90%                |
| 3         | BH <sub>3</sub> ·Me <sub>2</sub> NH           | DME                    | rt             | 1:6.6                         | 97%                |
| 4         | BH <sub>3</sub> ·Me <sub>2</sub> NH           | MTBE                   | rt             | 1:4                           | 95%                |
| 5         | BH <sub>3</sub> ·Me <sub>2</sub> NH           | Toluene                | rt             | 1:4.5                         | 92%                |
| 6         | BH <sub>3</sub> ·Me <sub>2</sub> NH           | DCM                    | rt             | 1:5                           | 90%                |
| 7         | BH <sub>3</sub> · <i>i</i> Pr <sub>2</sub> NH | DME                    | rt             | 1:6                           | 90%                |
| 8         | BH <sub>3</sub> ·Me <sub>2</sub> NH           | DME                    | 90 °C          | 1:4                           | 95%                |
| <b>9</b>  | <b>BH<sub>3</sub>·Me<sub>2</sub>NH</b>        | <b>DME</b>             | <b>-60 °C</b>  | <b>1:6.5</b>                  | <b>98%</b>         |
| <b>10</b> | <b>LiAlH<sub>4</sub></b>                      | <b>THF</b>             | <b>-100 °C</b> | <b>18:1</b>                   | <b>98%</b>         |
| <b>11</b> | <b>LiAlH<sub>4</sub></b>                      | <b>Et<sub>2</sub>O</b> | <b>-100 °C</b> | <b>18:1</b>                   | <b>98%</b>         |

<sup>a</sup>The reactions were performed using the precursor **2'** (0.018 mmol), Reductants (5.0 equiv.) in 1.0 mL solvent; <sup>b</sup>Isolated yield; rt = Room temperature; THF = Tetrahydrofuran; MTBE = *tert*-Butyl methyl ether, DCM = Dichloromethane; DME = 1,2-dimethoxyethane.

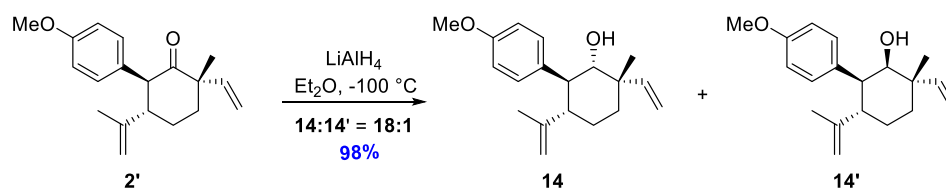

#### Method I (entry 10, Table S8):

To a solution of the precursor **2'** (5.0 mg, 0.018 mmol) in THF (1.0 mL) was added LiAlH<sub>4</sub> (3.4 mg, 0.09 mmol) under an argon atmosphere at -100 °C, and the mixture was stirred for 1 h. When the reaction completed (monitored by TLC), the reaction mixture was quenched with a saturated aqueous solution of NH<sub>4</sub>Cl, and was extracted with CH<sub>2</sub>Cl<sub>2</sub> (3×20 mL). The combined organic phase was washed with brine, dried over Na<sub>2</sub>SO<sub>4</sub>, and filtered. The filtrate was concentrated under reduced pressure, and the resulting crude product **14** and **14'** (dr = 18:1) was purified by flash column chromatography (silica gel, petroleum ether/ethyl acetate (50:1)) to give the desired product **14** (4.7 mg, 94% yield) as

a white solid and its isomer **14'** (0.2 mg, 4% yield).

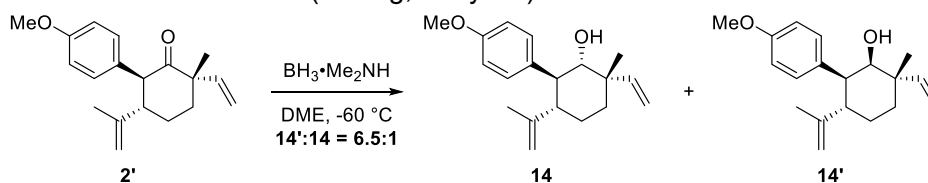

### Method II (entry 9, Table S8):

To a solution of the precursor **2'** (5.0 mg, 0.018 mmol) in DME (1.0 mL) was added  $\text{BH}_3 \cdot \text{Me}_2\text{NH}$  (5.3 mg, 0.09 mmol) under an argon atmosphere at  $-60\text{ }^\circ\text{C}$ , and the mixture was stirred for 48 h. When the reaction completed (monitored by TLC), the reaction mixture was quenched with a saturated aqueous solution of  $\text{NH}_4\text{Cl}$ , and was extracted with  $\text{CH}_2\text{Cl}_2$  ( $3 \times 20\text{ mL}$ ). The combined organic phase was washed with brine, dried over  $\text{Na}_2\text{SO}_4$ , and filtered. The filtrate was concentrated under reduced pressure, and the resulting crude product **14'** and **14** (dr = 6.5:1) was purified by flash column chromatography (silica gel, petroleum ether/ethyl acetate (50:1)) to give the desired product **14'** (4.25 mg, 85% yield) as a white solid and its isomer **14** (0.65 mg, 13% yield).

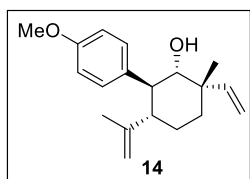

**Compound 14:** Colorless needles;  $[\alpha]_D^{25} = -32.0$  ( $c = 0.5$  in MeOH);  
**m.p.:** 59-62  $^\circ\text{C}$ .

**$^1\text{H NMR}$**  (600 MHz,  $\text{CDCl}_3$ )  $\delta$ : 7.09 (d,  $J = 7.2$  Hz, 2H), 6.83 (d,  $J = 8.4$  Hz, 2H), 6.30 (dd,  $J = 18.0, 10.8$  Hz, 1H), 5.26 (dd,  $J = 11.4, 1.2$  Hz, 1H), 5.19 (dd,  $J = 17.4, 1.2$  Hz, 1H), 4.51 (brs, 1H), 4.50 (brs, 1H), 3.78 (s, 3H), 3.40 (d,  $J = 10.8$  Hz, 1H), 2.60 (t,  $J = 11.4$  Hz, 1H), 2.39 (td,  $J = 12.0, 3.6$  Hz, 1H), 1.92-1.88 (m, 1H), 1.81-1.74 (m, 1H), 1.55-1.48 (m, 2H), 1.49 (s, 3H), 1.18 (s, 3H);  **$^{13}\text{C NMR}$**  (150 MHz,  $\text{CDCl}_3$ )  $\delta$ : 158.2, 147.1, 140.6, 132.7, 129.4, 114.5, 113.9, 111.6, 81.2, 55.1, 51.2, 50.5, 41.7, 36.6, 27.7, 27.4, 19.4. **HRMS** (ESI)  $m/z$  found 309.1826, calculated for  $\text{C}_{18}\text{H}_{24}\text{O}_2\text{Na}$   $[\text{M}+\text{Na}]^+$  309.1825. **MS** (EI)  $m/z$  (%): 286 (26), 150 (65), 121 (100), 91 (12), 81 (10), 68 (15), 57 (14). **IR** (KBr plate)  $\nu_{\text{max}}$ : 3532, 2928, 2892, 2851, 1637, 1611, 1511, 1446, 1243, 1182, 1012, 918, 892, 829, 812, 568  $\text{cm}^{-1}$ .

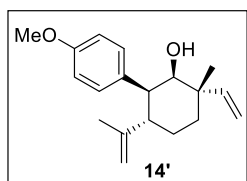

**Compound 14':** Colorless needles;  $[\alpha]_D^{25} = -5.6$  ( $c = 0.5$  in MeOH);  
**m.p.:** 86-88  $^\circ\text{C}$ .

**$^1\text{H NMR}$**  (400 MHz,  $\text{CDCl}_3$ )  $\delta$ : 7.11 (d,  $J = 8.8$  Hz, 2H), 6.83 (d,  $J = 8.8$  Hz, 2H), 5.95 (dd,  $J = 17.6, 11.2$  Hz, 1H), 5.20 (dd,  $J = 10.8, 0.8$  Hz, 1H), 5.15 (dd,  $J = 18.0, 1.2$  Hz, 1H), 4.67 (brs, 1H), 4.60 (brs, 1H), 3.78 (s, 3H), 3.46 (brs, 1H), 2.97 (dd,  $J = 12.0, 1.6$  Hz, 1H), 2.86 (td,  $J = 11.6, 3.6$  Hz, 1H), 1.86-1.78 (m, 1H), 1.74-1.66 (m, 1H), 1.64-1.56 (m, 2H), 1.49 (s, 3H), 1.07 (s, 3H);  **$^{13}\text{C NMR}$**  (100 MHz,  $\text{CDCl}_3$ )



$\delta$ : 158.0, 148.1, 144.9, 134.5, 129.5, 113.7, 113.2, 111.8, 78.7, 55.1, 46.5, 41.6, 41.4, 30.5, 28.5, 27.0, 19.1. **HRMS** (ESI)  $m/z$  found 309.1824, calculated for  $C_{18}H_{24}O_2Na$   $[M+Na]^+$  309.1825. **MS** (EI)  $m/z$  (%): 286 (19), 150 (62), 137 (18), 121 (100), 68 (12), 55 (7). **IR** (KBr plate)  $\nu_{max}$ : 3569, 2929, 2861, 2835, 1610, 1511, 1457, 1245, 1177, 1037, 913, 886, 840, 819  $cm^{-1}$ .

### 5.1.2 Synthesis of natural (-)-corypsoriol H (1e)

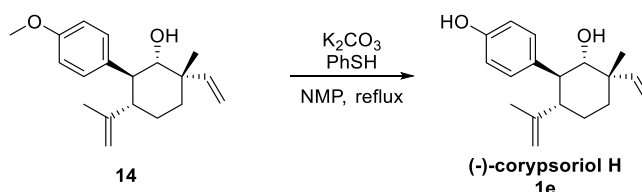

To a suspension solution of alcohol **14** (28.6 mg, 0.1 mmol) and  $K_2CO_3$  (5.5 mg, 0.04 mmol) in NMP (1.0 mL) was added PhSH (52.0  $\mu$ L, 0.5 mmol). The mixture was stirred under reflux for 14 h, cooled to room temperature, and quenched with  $H_2O$ . The resulting mixture was extracted with ethyl acetate (3 $\times$ 20 mL). The combined extracts were washed with brine, dried over  $Na_2SO_4$ , and concentrated. The crude residue was purified by flash column chromatography on silica gel (hexane/ethyl acetate) to give (-)-corypsoriol H (**1e**) (24.5 mg, 90% yield) as a colorless solid.

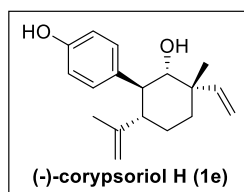

**(-)-corypsoriol H (1e)**: Colorless needles;  $[\alpha]_D^{25} = -32.0$  ( $c = 0.1$  in MeOH),  $[lit^{12}, [\alpha]_D^{25} = -120$  ( $c = 0.1$  in MeOH)]. **m.p.**: 151-153  $^{\circ}C$ .

**$^1H$  NMR** (600 MHz, methanol- $d_4$ )  $\delta$ : 7.01 (d,  $J = 8.4$  Hz, 2H), 6.69 (d,  $J = 9.0$  Hz, 2H), 6.30 (dd,  $J = 17.4, 10.8$  Hz, 1H), 5.24 (d,  $J = 12.0$  Hz, 1H), 5.18 (d,  $J = 18.0$  Hz, 1H), 4.49 (brs, 1H), 4.46 (brs, 1H),

3.43 (d,  $J = 10.2$  Hz, 1H), 2.58 (t,  $J = 10.8$  Hz, 1H), 2.39 (td,  $J = 12.6, 4.2$  Hz, 1H), 1.93 (dt,  $J = 13.8, 3.0$  Hz, 1H), 1.84-1.77 (m, 1H), 1.55 (td,  $J = 13.8, 4.2$  Hz, 1H), 1.48 (s, 3H), 1.46-1.43 (m, 1H), 1.15 (s, 3H);  **$^{13}C$  NMR** (150 MHz, methanol- $d_4$ )  $\delta$ : 156.7, 149.0, 142.5, 134.5, 130.8, 116.0, 114.8, 112.2, 82.4, 53.6, 51.9, 43.6, 37.9, 29.1, 28.7, 20.0. **HRMS** (ESI)  $m/z$  found 295.1670, calculated for  $C_{18}H_{24}O_2Na$   $[M+Na]^+$  295.1669. **MS** (EI)  $m/z$  (%): 272 (22), 149 (39), 136 (100), 107 (98), 84 (90), 55 (50). **IR** (KBr plate)  $\nu_{max}$ : 3433, 3243, 2960, 2927, 1644, 1614, 1513, 1449, 1370, 1231, 1037, 915, 887, 818, 733  $cm^{-1}$ .

## Comparison of <sup>1</sup>H NMR data for synthetic and natural (-)-corypsoriol H (1e)

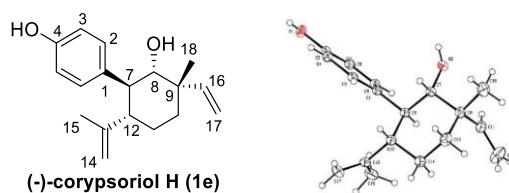

| Position | Natural corypsoriol H <sup>a,12</sup> | Synthetic corypsoriol H <sup>b</sup> | Δδ (ppm) |
|----------|---------------------------------------|--------------------------------------|----------|
| 1        | -                                     | -                                    | -        |
| 2,6      | 7.01, d ( <i>J</i> = 8.5 Hz)          | 7.01, d ( <i>J</i> = 8.4 Hz)         | 0.00     |
| 3,5      | 6.68, d ( <i>J</i> = 8.5 Hz)          | 6.69, d ( <i>J</i> = 8.4 Hz)         | -0.01    |
| 4        | -                                     | -                                    | -        |
| 7        | 2.58, t ( <i>J</i> = 10.6 Hz)         | 2.58, t ( <i>J</i> = 10.8 Hz)        | 0.00     |
| 8        | 3.43, d ( <i>J</i> = 10.6 Hz)         | 3.43, d ( <i>J</i> = 10.2 Hz)        | 0.00     |
| 9        | -                                     | -                                    | -        |
| 10       | 1.55, td ( <i>J</i> = 13.5, 3.4 Hz)   | 1.55, td (13.8, 4.2 Hz)              | 0.00     |
|          | 1.94, dt ( <i>J</i> = 13.5, 3.4 Hz)   | 1.93, dt (13.8, 3.0 Hz)              | 0.01     |
| 11       | 1.80, m                               | 1.84-1.77, m (1.81, m)               | -0.01    |
|          | 1.44, m                               | 1.47-1.43, m (1.45, m)               | -0.01    |
| 12       | 2.39, td ( <i>J</i> = 12.0, 3.8 Hz)   | 2.39, td ( <i>J</i> = 12.6, 4.2 Hz)  | 0.00     |
| 13       | -                                     | -                                    | -        |
| 14       | 4.50, brs                             | 4.49, brs                            | 0.01     |
|          | 4.46, brs                             | 4.46, brs                            | 0.00     |
| 15       | 1.49, s                               | 1.48, s                              | 0.01     |
| 16       | 6.30, dd ( <i>J</i> = 17.9, 11.0 Hz)  | 6.30, dd ( <i>J</i> = 17.4, 10.8 Hz) | 0.00     |
| 17       | 5.24, d ( <i>J</i> = 11.0 Hz)         | 5.24, d ( <i>J</i> = 12.0 Hz)        | 0.00     |
|          | 5.18, d ( <i>J</i> = 17.9 Hz)         | 5.18, d ( <i>J</i> = 18.0 Hz)        | 0.00     |
| 18       | 1.15, s                               | 1.15, s                              | 0.00     |

<sup>a</sup> NMR data measured at 400 MHz in methanol-*d*<sub>4</sub>; <sup>b</sup> NMR data measured at 600 MHz in methanol-*d*<sub>4</sub>.

## Comparison of <sup>1</sup>H NMR data for synthetic and natural (-)-corypsoriol H (1e)

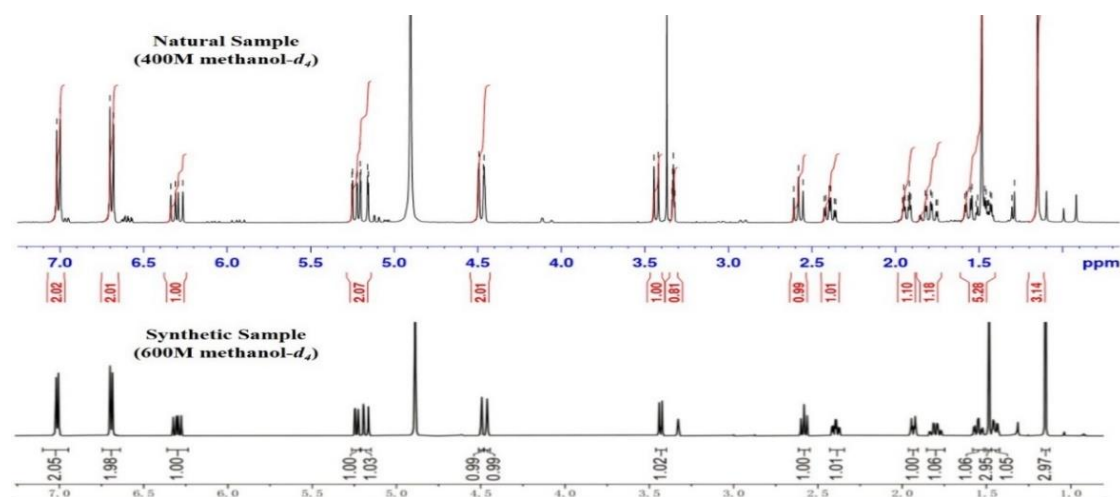

## Comparison of $^{13}\text{C}$ NMR data for synthetic and natural (-)-corypsoriol H (1e)

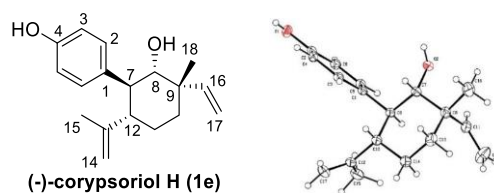

| Position | Natural corypsoriol H <sup>a,12</sup> | Synthetic corypsoriol H <sup>b</sup> | $\Delta\delta$ (ppm) |
|----------|---------------------------------------|--------------------------------------|----------------------|
| 1        | 134.5                                 | 134.5                                | 0.0                  |
| 2        | 130.9                                 | 130.8                                | 0.1                  |
| 3        | 116.1                                 | 116.0                                | 0.1                  |
| 4        | 156.9                                 | 156.7                                | 0.2                  |
| 5        | 116.1                                 | 116.0                                | 0.1                  |
| 6        | 130.9                                 | 130.8                                | 0.1                  |
| 7        | 53.7                                  | 53.6                                 | 0.1                  |
| 8        | 82.5                                  | 82.4                                 | 0.1                  |
| 9        | 43.7                                  | 43.6                                 | 0.1                  |
| 10       | 37.9                                  | 37.9                                 | 0.0                  |
| 11       | 28.7                                  | 28.7                                 | 0.0                  |
| 12       | 52.0                                  | 51.9                                 | 0.1                  |
| 13       | 149.0                                 | 149.0                                | 0.0                  |
| 14       | 112.2                                 | 112.2                                | 0.0                  |
| 15       | 20.0                                  | 20.0                                 | 0.0                  |
| 16       | 142.6                                 | 142.5                                | 0.1                  |
| 17       | 114.8                                 | 114.8                                | 0.0                  |
| 18       | 29.2                                  | 29.1                                 | 0.1                  |

<sup>a</sup> NMR data measured at 100 MHz in methanol- $d_4$ ; <sup>b</sup> NMR data measured at 150 MHz in methanol- $d_4$ .

## Comparison of $^{13}\text{C}$ NMR data for synthetic and natural (-)-corypsoriol H (1e)

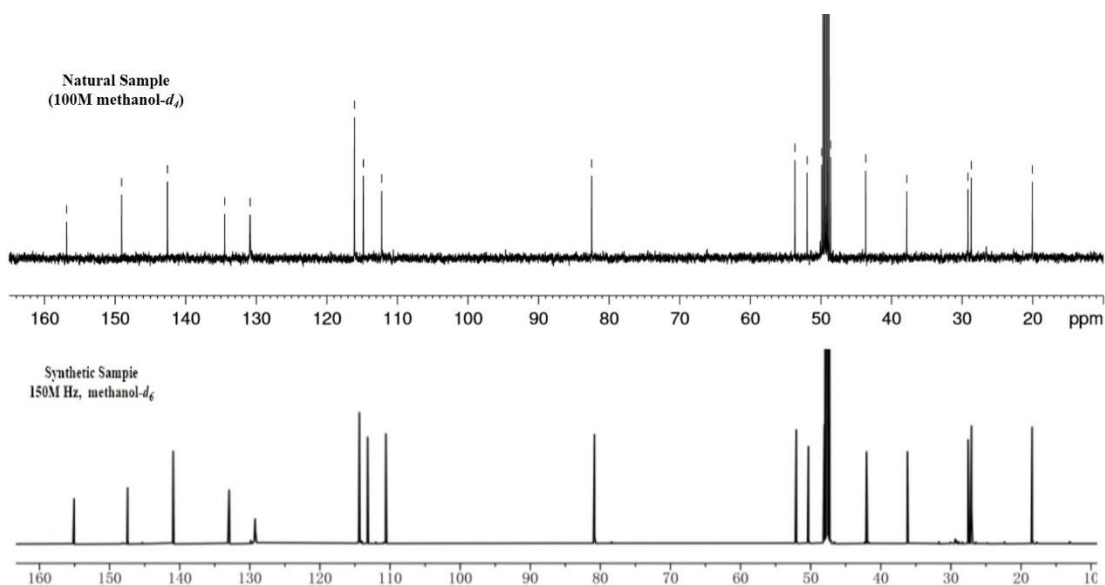

## 5.2. Synthesis of natural (-)-psoracorylifol G (1f)

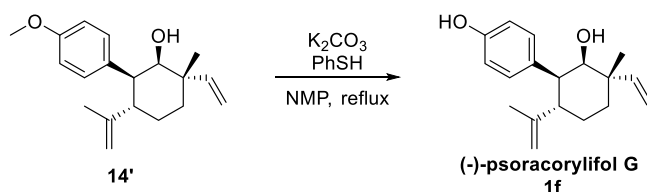

To a suspension solution of alcohol **14'** (19.4 mg, 0.068 mmol) and  $K_2CO_3$  (3.8 mg, 0.027 mmol) in NMP (1.0 mL) was added PhSH (35.0  $\mu$ L, 0.34 mmol). The mixture was stirred under reflux for 14 h, cooled to room temperature, and quenched with  $H_2O$ . The resulting mixture was extracted with ethyl acetate (3x20 mL). The combined extracts were washed with brine, dried over  $Na_2SO_4$ , and concentrated. The crude residue was purified by flash column chromatography on silica gel (hexane/ ethyl acetate) to furnish (-)-psoracorylifol G (**1f**) (16.6 mg, 90% yield).

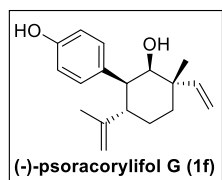

**(-)-psoracorylifol G (1f)**: Colorless needles;  $[\alpha]_D^{25} = -4.7$  ( $c = 0.1$  in MeOH), [lit<sup>13</sup>,  $[\alpha]_D^{25} = -20.0$  ( $c = 0.1$  in MeOH)]. **m.p.**: 129-131 °C.

**<sup>1</sup>H NMR** (600 MHz,  $CDCl_3$ )  $\delta$ : 7.05 (d,  $J = 7.8$  Hz, 2H), 6.74 (d,  $J = 7.2$  Hz, 2H), 5.94 (dd,  $J = 18.0, 11.4$  Hz, 1H), 5.20 (d,  $J = 10.8$  Hz, 1H),

5.15 (d,  $J = 18.0$  Hz, 1H), 5.07 (brs, 1H), 4.66 (brs, 1H), 4.59 (brs, 1H), 3.47 (brs, 1H), 2.95 (d,  $J = 12.6$  Hz, 1H), 2.83 (td,  $J = 10.8$  Hz, 1H), 1.80 (t,  $J = 13.2$  Hz, 1H), 1.70-1.56 (m, 4H), 1.48 (s, 3H), 1.07 (s, 3H); **<sup>13</sup>C NMR** (150 MHz,  $CDCl_3$ )  $\delta$ : 154.0, 148.0, 144.9, 134.5, 129.7, 115.2, 113.3, 111.9, 78.8, 46.4, 41.6, 41.4, 30.5, 28.5, 27.1, 19.0. **HRMS** (ESI)  $m/z$  found 295.1670, calculated for  $C_{18}H_{24}O_2Na$   $[M+Na]^+$  295.1669. **MS** (EI)  $m/z$  (%): 272 (21), 136 (90), 123 (21), 107 (100), 81 (13), 68 (18), 55 (12). **IR** (KBr plate)  $\nu_{max}$ : 3393, 2963, 2929, 2863, 1642, 1613, 1514, 1452, 1373, 1230, 1173, 1018, 914, 888, 818  $cm^{-1}$ .

Comparison of <sup>1</sup>H NMR data of synthetic and natural (-)-psoracorylifol G (1f)

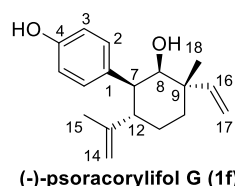

| Position | Natural psoracorylifol G <sup>a,13</sup> | Synthetic psoracorylifol G <sup>b</sup> | Δδ (ppm) |
|----------|------------------------------------------|-----------------------------------------|----------|
| 2        | 7.06, d ( <i>J</i> = 8.5 Hz)             | 7.05, d ( <i>J</i> = 7.8 Hz)            | 0.01     |
| 3        | 6.75, d ( <i>J</i> = 8.5 Hz)             | 6.74, d ( <i>J</i> = 7.2 Hz)            | 0.01     |
| 5        | 6.75, d ( <i>J</i> = 8.5 Hz)             | 6.74, d ( <i>J</i> = 7.2 Hz)            | 0.01     |
| 6        | 7.06, d ( <i>J</i> = 8.5 Hz)             | 7.05, d ( <i>J</i> = 7.8 Hz)            | 0.01     |
| 7        | 2.95, dd ( <i>J</i> = 12.0, 1.9 Hz)      | 2.95, dd ( <i>J</i> = 12.6 Hz)          | 0.00     |
| 8        | 3.47, d ( <i>J</i> = 1.9 Hz)             | 3.47, brs                               | 0.00     |
| 10       | 1.81, m                                  | 1.80, t, ( <i>J</i> = 13.2 Hz)          | 0.01     |
|          | 1.60, m                                  | 1.62-1.56, m (1.57, m)                  | 0.03     |
| 11       | 1.69, td ( <i>J</i> = 12.0, 4.0 Hz)      | 1.71-1.64, m (1.68, m)                  | 0.01     |
|          | 1.59, m                                  | 1.62-1.56, m (1.57, m)                  | 0.02     |
| 12       | 2.84, td ( <i>J</i> = 12.0, 4.0 Hz)      | 2.83, td ( <i>J</i> = 10.8, 4.2 Hz)     | 0.01     |
| 14       | 4.66, brs                                | 4.66, brs                               | -0.01    |
|          | 4.59, brs                                | 4.59, brs                               | 0.00     |
| 15       | 1.48, s                                  | 1.48, s                                 | 0.00     |
| 16       | 5.95, dd ( <i>J</i> = 17.7, 11.1 Hz)     | 5.94, dd ( <i>J</i> = 18.0, 11.4 Hz)    | 0.01     |
| 17       | 5.19, dd ( <i>J</i> = 11.1, 1.0 Hz)      | 5.20, d ( <i>J</i> = 10.8 Hz)           | 0.01     |
|          | 5.15, dd ( <i>J</i> = 17.7, 1.0 Hz)      | 5.15, d ( <i>J</i> = 18.0 Hz)           | 0.00     |
| 18       | 1.07, s                                  | 1.07, s                                 | 0.00     |
| 8-OH     | 4.78, brs                                |                                         |          |

<sup>a</sup> NMR data measured at 400 MHz in CDCl<sub>3</sub>; <sup>b</sup> NMR data measured at 600 MHz in CDCl<sub>3</sub>.

## Comparison of $^{13}\text{C}$ NMR data of synthetic and natural (-)-psoracorylifol G (1f)

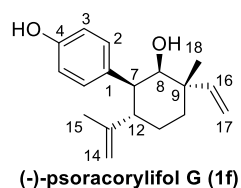

| Position | Natural psoracorylifol G <sup>a,13</sup> | Synthetic psoracorylifol G <sup>b</sup> | $\Delta\delta$ (ppm) |
|----------|------------------------------------------|-----------------------------------------|----------------------|
| 1        | 134.7                                    | 134.5                                   | 0.2                  |
| 2        | 129.8                                    | 129.7                                   | 0.1                  |
| 3        | 115.2                                    | 115.2                                   | 0.0                  |
| 4        | 153.9                                    | 154.0                                   | -0.1                 |
| 5        | 115.2                                    | 115.2                                   | 0.0                  |
| 6        | 129.8                                    | 129.7                                   | 0.1                  |
| 7        | 46.5                                     | 46.4                                    | 0.1                  |
| 8        | 78.7                                     | 78.8                                    | -0.1                 |
| 9        | 41.4                                     | 41.4                                    | 0.0                  |
| 10       | 30.5                                     | 30.5                                    | 0.0                  |
| 11       | 28.5                                     | 28.5                                    | 0.0                  |
| 12       | 41.7                                     | 41.6                                    | 0.1                  |
| 13       | 148.0                                    | 148.0                                   | 0.0                  |
| 14       | 111.8                                    | 111.9                                   | -0.1                 |
| 15       | 19.0                                     | 19.0                                    | 0.0                  |
| 16       | 144.9                                    | 144.9                                   | 0.0                  |
| 17       | 113.3                                    | 113.3                                   | 0.0                  |
| 18       | 27.0                                     | 27.1                                    | -0.1                 |

<sup>a</sup> NMR data measured at 100 MHz in  $\text{CDCl}_3$ ; <sup>b</sup> NMR data measured at 150 MHz in  $\text{CDCl}_3$ .

## 5.3 Synthesis of natural (-)-8 $\alpha$ -hydroxy-cyclobakuchiol C (1g)

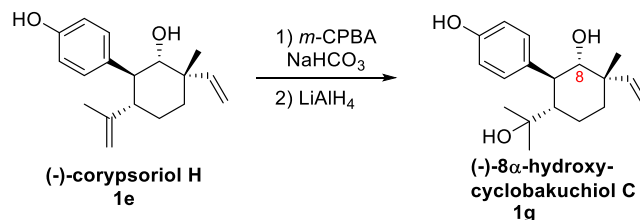

To an ice-cold suspension of  $\text{NaHCO}_3$  (21.0 mg, 0.25 mmol) and *m*-CPBA (16.1 mg, 80%, 0.75 mmol) in  $\text{CH}_2\text{Cl}_2$  (1.0 mL) was added a solution of (-)-corypsoriol H (**1e**, 13.6 mg, 0.05 mmol) in  $\text{CH}_2\text{Cl}_2$  (1.0 mL) at 0 °C. The mixture was stirred at 5 °C for about 4 h. When the

starting material disappeared, the reaction was quenched by addition of Me<sub>2</sub>S (5.3 μL, 0.07 mmol) and saturated NaHCO<sub>3</sub> with vigorous stirring. The layers were separated and the aqueous layer was extracted with CH<sub>2</sub>Cl<sub>2</sub> (3×20 mL). The combined organic layers were washed with brine, dried over Na<sub>2</sub>SO<sub>4</sub>, and concentrated to give a residue, which was used for the next step.

To an ice-cold solution of above oxirane in THF (2.0 mL) was added slowly LiAlH<sub>4</sub> (9.5 mg, 0.25 mmol) at 0 °C. The resulting mixture was stirred for 3 h under reflux. After reaction completion, the mixture was cooled to room temperature, quenched by addition of aqueous HCl (1.0 mol/L), and then extracted with ethyl acetate (3×20 mL). The combined organic layers were washed with saturated NaHCO<sub>3</sub> and brine, dried over Na<sub>2</sub>SO<sub>4</sub>, and concentrated. The residual oil was purified by flash column chromatography on silica gel (hexane/ethyl acetate) to give (-)-8α-hydroxy-cyclobakuchiol C (**1g**) (11.3 mg, 78% yield from natural (-)-corypsoriol H (**1e**)).

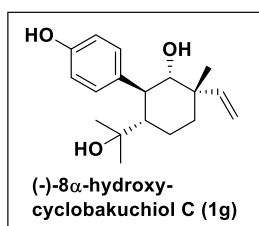

**(-)-8α-hydroxy-cyclobakuchiol C (**1g**):** Colorless needles;  $[\alpha]_D^{25} = -33.4$  (c = 0.1 in MeOH), [lit<sup>10</sup>,  $[\alpha]_D^{25} = -18.5$  (c = 0.1 in MeOH)].  
**m.p.:** 123-125 °C.

**<sup>1</sup>H NMR** (600 MHz, acetone-*d*<sub>6</sub>) δ: 8.16 (s, 1H), 7.08 (brs, 2H), 6.74 (d, *J* = 7.8 Hz, 2H), 6.23 (dd *J* = 17.4, 10.8 Hz, 1H), 5.11 (dd, *J* = 10.8, 1.2 Hz, 1H), 5.09 (dd, *J* = 10.2, 1.8 Hz, 1H), 3.38 (dd, *J* = 10.2, 4.2 Hz, 1H), 2.48 (s, 1H), 2.46 (t, *J* = 10.8 Hz, 1H), 2.12 (s, 1H), 1.88-1.83 (m, 2H), 1.79-1.76 (m, 1H), 1.46-1.38 (m, 2H), 1.07 (s, 3H), 0.93 (s, 3H), 0.75 (s, 3H); **<sup>13</sup>C NMR** (150 MHz, acetone-*d*<sub>6</sub>) δ: 156.8, 142.5, 134.7, 130.9, 116.1, 113.7, 82.1, 73.2, 53.3, 50.5, 42.4, 36.5, 29.3, 28.6, 27.5, 24.0. **HRMS** (ESI) *m/z* found 313.1775, calculated for C<sub>18</sub>H<sub>26</sub>O<sub>3</sub>Na [M+Na]<sup>+</sup> 313.1774. **MS** (EI) *m/z* (%): 290 (5), 272 (6), 214 (38), 161 (32), 133 (82), 107 (100), 59 (55). **IR** (KBr plate)  $\nu_{\max}$ : 3546, 2956, 2930, 2868, 1616, 1543, 1513, 1455, 1383, 1256, 1227, 1172, 1010, 928, 907, 827 cm<sup>-1</sup>.

## Comparison of <sup>1</sup>H NMR data of synthetic and natural (-)-8 $\alpha$ -hydroxy-cyclobakuchiol C (1g)

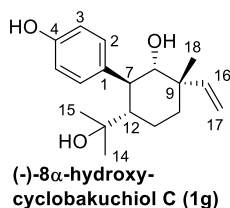

| Position | Natural<br>8 $\alpha$ -hydroxy-cyclobakuchiol C <sup>a,10</sup> | Synthetic<br>8 $\alpha$ -hydroxy-cyclobakuchiol C <sup>b</sup> | $\Delta\delta$<br>(ppm) |
|----------|-----------------------------------------------------------------|----------------------------------------------------------------|-------------------------|
| 1        | -                                                               | -                                                              | -                       |
| 2,6      | 7.07, d ( $J = 5.5$ Hz)                                         | 7.08, d ( $J = 6.6$ Hz)                                        | -0.01                   |
| 3,5      | 6.74, d ( $J = 8.5$ Hz)                                         | 6.74, d ( $J = 7.8$ Hz)                                        | 0.00                    |
| 4        | -                                                               | -                                                              | -                       |
| 7        | 2.45, t ( $J = 11.0$ Hz)                                        | 2.46, t ( $J = 10.8$ Hz)                                       | -0.01                   |
| 8        | 3.38, d ( $J = 10.0$ Hz)                                        | 3.38, dd ( $J = 10.2, 4.2$ Hz)                                 | 0.00                    |
| 9        | -                                                               | -                                                              | -                       |
| 10       | 1.89, m                                                         | 1.88-1.83, m (1.86, m)                                         | 0.03                    |
|          | 1.43, m                                                         | 1.46-1.38, m (1.42, m)                                         | 0.01                    |
| 11       | 1.79, m                                                         | 1.79-1.76, m (1.78, m)                                         | 0.01                    |
|          | 1.42, m                                                         | 1.46-1.38, m (1.42, m)                                         | 0.00                    |
| 12       | 1.89, m                                                         | 1.85-1.83, m (1.84, m)                                         | 0.05                    |
| 13       | -                                                               | -                                                              | -                       |
| 14       | 0.95, s                                                         | 0.93, s                                                        | 0.02                    |
| 15       | 0.72, s                                                         | 0.75, s                                                        | -0.03                   |
| 16       | 6.23, dd ( $J = 17.5, 11.5$ Hz)                                 | 6.23, dd ( $J = 17.4, 10.8$ Hz)                                | 0.00                    |
| 17       | 5.13, dd ( $J = 17.5, 1.5$ Hz)                                  | 5.11, dd ( $J = 10.8, 1.2$ Hz)                                 | 0.02                    |
|          | 5.10, dd ( $J = 11.5, 1.5$ Hz)                                  | 5.09, dd ( $J = 10.2, 1.8$ Hz)                                 | 0.01                    |
| 18       | 1.07, s                                                         | 1.07, s                                                        | 0.00                    |

<sup>a</sup> NMR data measured at 500 MHz in acetone- $d_6$ ; <sup>b</sup> NMR data measured at 600 MHz in acetone- $d_6$ .

## Comparison of <sup>1</sup>H NMR spectra of (-)-8 $\alpha$ -hydroxy-cyclobakuchiol C (1g)

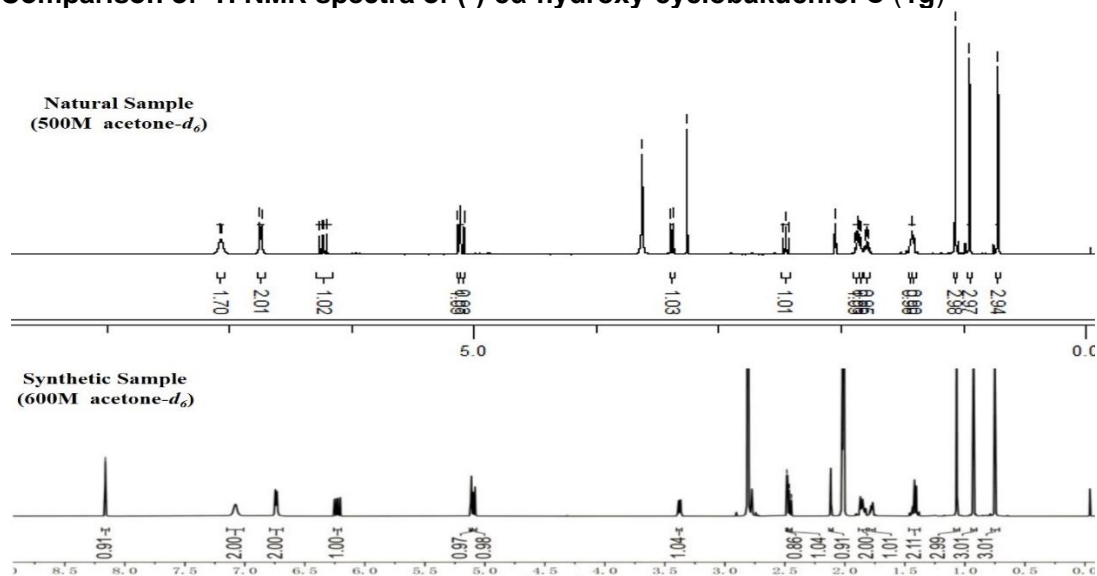



**Comparison of  $^{13}\text{C}$  NMR data of synthetic and natural (-)-8 $\alpha$ -hydroxy-cyclobakuchiol C (1g)**



| Position | Natural<br>8 $\alpha$ -hydroxy-cyclobakuchiol C <sup>a,10</sup> | Synthetic<br>8 $\alpha$ -hydroxy-cyclobakuchiol C <sup>b</sup> | $\Delta\delta$<br>(ppm) |
|----------|-----------------------------------------------------------------|----------------------------------------------------------------|-------------------------|
| 1        | 134.5                                                           | 134.7                                                          | -0.2                    |
| 2        | 130.3                                                           | 130.5                                                          | -0.2                    |
| 3        | 116.1                                                           | 116.1                                                          | 0.0                     |
| 4        | 156.8                                                           | 156.8                                                          | 0.0                     |
| 5        | 116.1                                                           | 116.1                                                          | 0.0                     |
| 6        | 130.3                                                           | 130.9                                                          | -0.6                    |
| 7        | 50.4                                                            | 50.5                                                           | -0.1                    |
| 8        | 82.1                                                            | 82.1                                                           | 0.0                     |
| 9        | 42.4                                                            | 42.4                                                           | 0.0                     |
| 10       | 36.6                                                            | 36.5                                                           | 0.1                     |
| 11       | 23.8                                                            | 24.0                                                           | -0.2                    |
| 12       | 53.2                                                            | 53.3                                                           | -0.1                    |
| 13       | 73.5                                                            | 73.2                                                           | 0.3                     |
| 14       | 26.9                                                            | 27.5                                                           | -0.6                    |
| 15       | 29.4                                                            | 29.3                                                           | 0.1                     |
| 16       | 142.4                                                           | 142.5                                                          | -0.1                    |
| 17       | 114.0                                                           | 113.7                                                          | 0.3                     |
| 18       | 28.6                                                            | 28.6                                                           | 0.0                     |

<sup>a</sup> NMR data measured at 125 MHz in acetone- $d_6$ ; <sup>b</sup> NMR data measured at 150 MHz in acetone- $d_6$ .

**Comparison of  $^{13}\text{C}$  NMR spectra of (-)-8 $\alpha$ -hydroxy-cyclobakuchiol C (1g)**

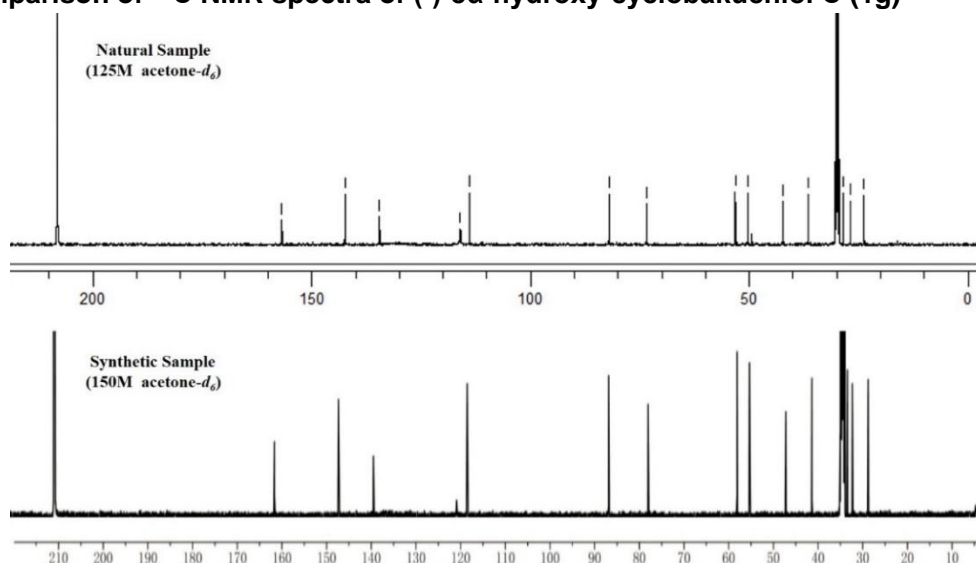

## 5.4. Synthesis of the proposed corypsoriol I (1h)

### 5.4.1 Synthesis of compound 15

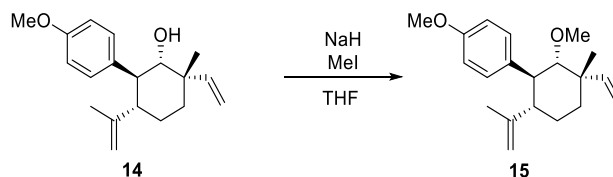

To a suspension solution of alcohol **14** (70.0 mg, 0.25 mmol) and NaH (39.2 mg, 60%, 0.98 mmol) in THF (2.0 mL) was added MeI (61.0  $\mu$ L, 0.98 mmol). The mixture was stirred at room temperature for 20 h, and quenched with H<sub>2</sub>O. The resulting mixture was extracted with ethyl acetate (3 $\times$ 20 mL). The combined organic phase was washed with brine, dried over Na<sub>2</sub>SO<sub>4</sub>, and filtered, and concentrated in vacuo. The crude residue was purified by flash column chromatography (petroleum ether/ethyl acetate = 10:1) on silica gel to give methylether **15** (71.3 mg, 95% yield) as a colorless oil.

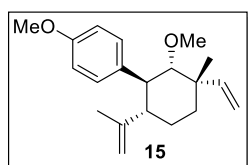

**Compound 15:** Colorless oil;  $[\alpha]_D^{25} = -61.4$  ( $c = 0.5$  in MeOH).

**<sup>1</sup>H NMR** (400 MHz, CDCl<sub>3</sub>)  $\delta$ : 7.11 (d,  $J = 8.4$  Hz, 2H), 6.80 (d,  $J = 8.8$  Hz, 2H), 6.23 (dd,  $J = 18.0, 11.2$  Hz, 1H), 5.21 (dd,  $J = 11.2, 1.6$  Hz, 1H), 5.13 (dd,  $J = 18.0, 1.6$  Hz, 1H), 4.54 (brs, 1H), 4.51 (brs, 1H), 3.78 (s, 3H), 2.83 (d,  $J = 10.4$  Hz, 1H), 2.74 (s, 3H), 2.64 (t,  $J = 11.6$  Hz, 1H), 2.45 (td,  $J = 12.0, 3.6$  Hz, 1H), 1.91-1.87(m, 1H), 1.77-1.65 (m, 1H), 1.52-1.43 (m, 2H), 1.49 (s, 3H), 1.13 (s, 3H); **<sup>13</sup>C NMR** (100 MHz, CDCl<sub>3</sub>)  $\delta$ : 157.7, 147.2, 141.4, 134.1, 129.8, 113.8, 113.1, 111.7, 92.7, 61.4, 55.0, 51.0, 49.4, 43.1, 36.7, 27.8, 27.6, 19.2. **HRMS** (ESI)  $m/z$  found 323.1981, calculated for C<sub>20</sub>H<sub>28</sub>O<sub>2</sub>Na [M+Na]<sup>+</sup> 323.1982. **MS** (EI)  $m/z$  (%): 300 (21), 164 (100), 149 (31), 121 (80), 68 (22), 55 (24). **IR** (KBr plate)  $\nu_{\max}$ : 3402, 3074, 2970, 2929, 2862, 2830, 1644, 1612, 1512, 1456, 1247, 1178, 1106, 1039, 912, 886, 818 cm<sup>-1</sup>.

### 5.4.2 Synthesis of phenol 16

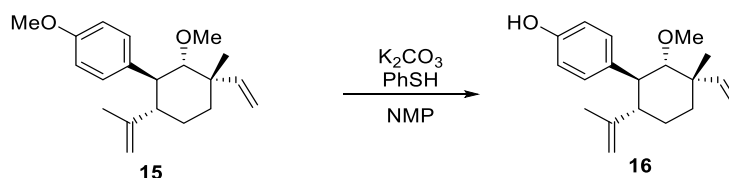

To a suspension solution of methylether **15** (42.0 mg, 0.14 mmol) and K<sub>2</sub>CO<sub>3</sub> (7.7 mg, 0.056 mmol) in NMP (2.0 mL) was added PhSH (44.0  $\mu$ L, 0.42 mmol). The mixture was stirred under reflux for 14 h. The reaction was quenched by addition of HCl (1.0 mol/L) and extracted with ethyl acetate (3 $\times$ 20 mL). The combined organic layers were washed with brine, dried (Na<sub>2</sub>SO<sub>4</sub>), and concentrated. The resulting crude product was purified by flash

column chromatography on silica gel (hexane/ethyl acetate) to furnish phenol **16** (38.0 mg, 95% yield).

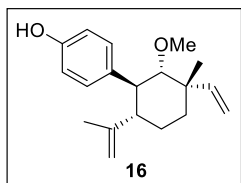

**Compound 16:** White solid;  $[\alpha]_D^{21} = -56.7$  ( $c = 0.1$  in MeOH); **m.p.:** 164.2-165.3 °C.

**<sup>1</sup>H NMR** (400 MHz, CDCl<sub>3</sub>)  $\delta$ : 7.06 (d,  $J = 8.0$  Hz, 2H), 6.72 (d,  $J = 8.8$  Hz, 2H), 6.22 (dd,  $J = 18.0, 11.2$  Hz, 1H), 5.20 (dd,  $J = 11.2, 0.8$  Hz, 1H), 5.12 (dd,  $J = 18.0, 1.2$  Hz, 1H), 4.82 (s, 1H), 4.54 (brs, 1H), 4.51 (brs, 1H), 2.84 (d,  $J = 10.4$  Hz, 1H), 2.77 (s, 3H), 2.64 (t,  $J = 11.6$  Hz, 1H), 2.43 (td,  $J = 12.0, 4.0$  Hz, 1H), 1.90-1.85 (m, 1H), 1.77-1.65 (m, 1H), 1.51-1.43 (m, 2H), 1.49 (s, 3H), 1.13 (s, 3H); **<sup>13</sup>C NMR** (150 MHz, CDCl<sub>3</sub>)  $\delta$ : 153.7, 147.2, 141.3, 134.3, 130.0, 114.8, 113.9, 111.7, 92.8, 61.4, 51.1, 49.4, 43.1, 36.8, 27.8, 27.6, 19.2. **HRMS** (ESI)  $m/z$  found 309.1822, calculated for C<sub>19</sub>H<sub>26</sub>O<sub>2</sub>Na [M+Na]<sup>+</sup> 309.1825; **MS** (EI)  $m/z$  (%): 286 (9), 242 (6), 203 (6), 150 (100), 107 (56), 84 (40), 57 (37). **IR** (KBr plate)  $\nu_{\max}$ : 3421, 3079, 2960, 2925, 2853, 1712, 1616, 1516, 1454, 1374, 1223, 1101, 1016, 910, 886, 800 cm<sup>-1</sup>.

#### 5.4.3 Synthesis of the proposed corypsorior I (1h)

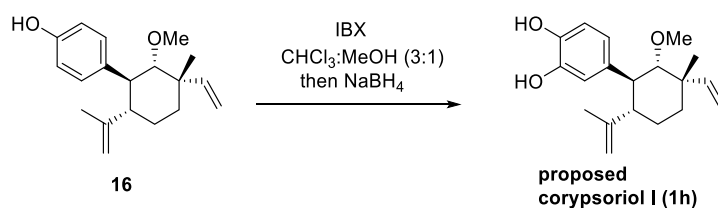

To a solution of phenol **16** (18.0 mg, 0.06 mmol) in CHCl<sub>3</sub>/MeOH (1.2 mL) (3:1 v/v) was added IBX (20.0 mg, 0.07 mmol) at 0 °C under an argon atmosphere. A yellow-to-orange color developed and the mixture was stirred for 2 h, then NaBH<sub>4</sub> (21.0 mg, 0.54 mmol) was added at 0 °C under vigorous stirring until the color disappeared (usually within 30 min).<sup>11</sup> The reaction was quenched by addition of HCl (1.0 mol/L) and extracted with ethyl acetate (3x20 mL). The combined extracts were washed with brine, dried over Na<sub>2</sub>SO<sub>4</sub>, and filtered. The filtrate was concentrated under reduced pressure, and the residue was subjected to column chromatography on silica gel using ethyl acetate-petroleum ether (1:1) to give the proposed corypsorior I (**1h**) (16.9 mg, 93% yield).

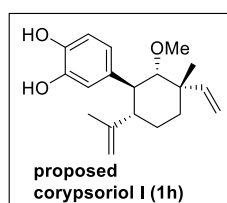

**Proposed corypsorior I (1h):** White solid;  $[\alpha]_D^{25} = -50.0$  ( $c = 0.1$  in MeOH),  $[\text{lit}^{12}, [\alpha]_D^{25} = -60.0$  ( $c = 0.1$  in MeOH)]. **m.p.:** 175-177 °C.

**<sup>1</sup>H NMR** (600 MHz, methanol-*d*<sub>4</sub>)  $\delta$ : 6.65 (d,  $J = 8.4$  Hz, 2H), 6.53 (brs, 1H), 6.19 (dd,  $J = 18.0, 11.4$  Hz, 1H), 5.17 (dd,  $J = 10.8, 1.2$  Hz, 1H), 5.12 (dd,  $J = 18.0, 1.2$  Hz, 1H), 4.52 (brs, 1H), 4.48 (brs, 1H), 2.95 (d,  $J = 10.2$  Hz, 1H), 2.82 (s, 3H), 2.51 (t,  $J = 11.4$  Hz, 1H), 2.44 (td,  $J = 12.0, 4.2$  Hz, 1H),

1.89 (dt,  $J = 13.8, 3.0$  Hz, 1H), 1.75-1.68 (m, 1H), 1.54-1.49 (m, 1H), 1.48 (s, 3H), 1.43-1.39 (m, 1H), 1.11 (s, 3H);  $^{13}\text{C NMR}$  (150 MHz, methanol- $d_4$ )  $\delta$ : 148.6, 145.7, 144.4, 142.9, 135.0, 115.8, 114.2, 112.2, 94.0, 61.8, 52.6, 51.2, 44.3, 37.5, 28.9, 28.6, 19.6. **HRMS** (ESI)  $m/z$  found 325.1773, calculated for  $\text{C}_{19}\text{H}_{26}\text{O}_3\text{Na}$   $[\text{M}+\text{Na}]^+$  325.1774. **MS** (EI)  $m/z$  (%): 302 (19), 257 (9), 202 (10), 166 (100), 123 (37), 68 (18), 55 (17). **IR** (KBr plate)  $\nu_{\text{max}}$ : 3368, 2931, 2864, 2829, 1641, 1605, 1518, 1443, 1375, 1278, 1190, 1104, 911, 888, 810  $\text{cm}^{-1}$ .

### Comparison of $^1\text{H NMR}$ data of synthetic and natural corypsorior I (1h)

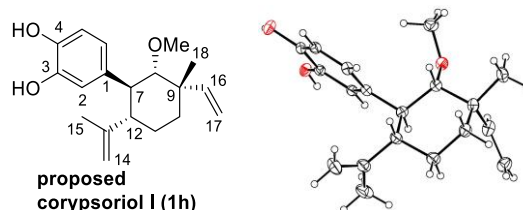

| Position           | Natural corypsorior I <sup>a,12</sup> | Synthetic corypsorior I <sup>b</sup> | $\Delta\delta$ (ppm) |
|--------------------|---------------------------------------|--------------------------------------|----------------------|
| 1                  | -                                     | -                                    | -                    |
| 2                  | 6.64 (d, $J = 2.0$ Hz)                | 6.64 (d, $J = 8.4$ Hz)               | 0.00                 |
| 3                  | -                                     | -                                    | -                    |
| 4                  | -                                     | -                                    | -                    |
| 5                  | 6.62 (d, $J = 8.0$ Hz)                | 6.64 (d, $J = 8.4$ Hz)               | -0.02                |
| 6                  | 6.52 (dd, $J = 8.0, 2.0$ Hz)          | 6.53 (d, $J = 7.2$ Hz)               | -0.01                |
| 7                  | 2.12 (t, $J = 9.2$ Hz)                | 2.51 (t, $J = 11.4$ Hz)              | -0.39                |
| 8                  | 3.84 (d, $J = 9.6$ Hz)                | 2.95 (d, $J = 10.4$ Hz)              | 0.99                 |
| 9                  | -                                     | -                                    | -                    |
| 10 $_{\alpha}$     | 1.34, m                               | 1.89 (dt, $J = 13.8, 3.0$ Hz)        | -0.55                |
| 10 $_{\beta}$      | 1.77, m                               | 1.54-1.49, m (1.52, m)               | 0.25                 |
| 11 $_{\alpha}$     | 1.92, m                               | 1.75-1.68, m (1.72, m)               | -0.20                |
| 11 $_{\beta}$      | 1.34, o <sup>c</sup>                  | 1.43-1.39, m (1.41, m)               | -0.07                |
| 12                 | 2.36 (td, $J = 9.7, 4.1$ )            | 2.44 (td, $J = 12.0, 4.2$ Hz)        | -0.08                |
| 13                 | -                                     | -                                    | -                    |
| 14                 | 4.14, brs                             | 4.52, brs                            | -0.38                |
|                    | 4.09, brs                             | 4.48, brs                            | -0.39                |
| 15                 | 1.37, s                               | 1.48, s                              | -0.11                |
| 16                 | 6.16 (dd, $J = 17.8, 10.8$ Hz)        | 6.19 (dd, $J = 18.0, 11.4$ Hz)       | -0.03                |
| 17 $_{\alpha}$     | 4.79 (dd, $J = 10.8, 1.2$ Hz)         | 5.12 (dd, $J = 10.8, 1.2$ Hz)        | -0.33                |
| 17 $_{\beta}$      | 4.90 (dd, $J = 17.7, 1.2$ Hz)         | 5.17 (dd, $J = 18.0, 1.2$ Hz)        | -0.27                |
| 18                 | 1.14, s                               | 1.11, s                              | 0.03                 |
| 8-OCH <sub>3</sub> | 3.02, s                               | 2.82, s                              | 0.20                 |

<sup>a</sup> NMR data measured at 400 MHz in methanol- $d_4$ ; <sup>b</sup> NMR data measured at 600 MHz in methanol- $d_4$ ; <sup>c</sup> "o" means overlapped.

Comparison of  $^{13}\text{C}$  NMR data of synthetic and natural (-)-corypsorior I (1h)

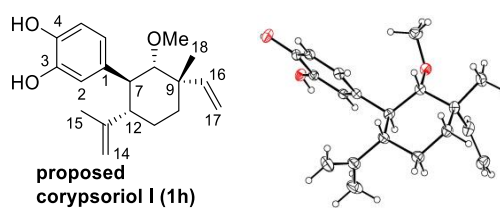

| Position           | Natural corypsorior I <sup>a,12</sup> | Synthetic corypsorior I <sup>b</sup> | $\Delta\delta$ (ppm) |
|--------------------|---------------------------------------|--------------------------------------|----------------------|
| 1                  | 134.0                                 | 135.0                                | -1.0                 |
| 2                  | 115.8                                 | 115.8                                | 0.0                  |
| 3                  | 146.2                                 | 145.7                                | 0.5                  |
| 4                  | 146.1                                 | 144.4                                | 1.7                  |
| 5                  | 116.6                                 | 115.8                                | 0.8                  |
| 6                  | 121.4                                 | 115.8                                |                      |
| 7                  | 58.2                                  | 51.2                                 | 7.0                  |
| 8                  | 87.8                                  | 94.0                                 | -6.2                 |
| 9                  | 49.6                                  | 44.3                                 | 5.3                  |
| 10                 | 41.3                                  | 28.9                                 | -12.4                |
| 11                 | 31.5                                  | 37.5                                 | -6.0                 |
| 12                 | 50.2                                  | 52.6                                 | -2.4                 |
| 13                 | 149.4                                 | 148.6                                | 0.8                  |
| 14                 | 110.3                                 | 112.2                                | -1.9                 |
| 15                 | 20.0                                  | 19.6                                 | -0.4                 |
| 16                 | 151.6                                 | 142.9                                | 8.7                  |
| 17                 | 109.1                                 | 114.2                                | -5.1                 |
| 18                 | 20.4                                  | 28.6                                 | -8.2                 |
| 8-OCH <sub>3</sub> | 55.9                                  | 61.8                                 | -5.9                 |

<sup>a</sup> NMR data measured at 100 MHz in methanol-*d*<sub>4</sub>; <sup>b</sup> NMR data measured at 150 MHz in methanol-*d*<sub>4</sub>.

## 6. X-Ray crystallography Data

### 6.1 X-Ray crystallography of compound **8**

The crystal of compound **8** for X-ray diffraction study was obtained through the dissolving of compound in ethyl acetate and petroleum ether, followed by slow evaporation of the solvent at room temperature. X-ray data collections were performed in an Agilent Super Nova.

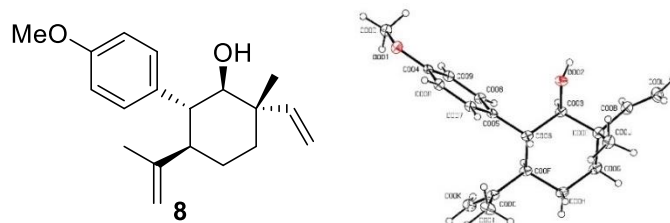

**Figure S1.** X-Ray coordinate of compound **8** (CCDC 2226753). Displacement ellipsoids are scaled to the 30% probability level.

| Identification code                         | Compound <b>8</b>                                             |
|---------------------------------------------|---------------------------------------------------------------|
| Empirical formula                           | C <sub>19</sub> H <sub>26</sub> O <sub>2</sub>                |
| Formula weight                              | 286.40                                                        |
| Temperature/K                               | 149.95(10)                                                    |
| Crystal system                              | orthorhombic                                                  |
| Space group                                 | P2 <sub>1</sub> 2 <sub>1</sub> 2 <sub>1</sub>                 |
| a/Å                                         | 6.55997(12)                                                   |
| b/Å                                         | 14.3262(3)                                                    |
| c/Å                                         | 17.4645(4)                                                    |
| α/°                                         | 90                                                            |
| β/°                                         | 90                                                            |
| γ/°                                         | 90                                                            |
| Volume/Å <sup>3</sup>                       | 1641.30(6)                                                    |
| Z                                           | 4                                                             |
| ρ <sub>calc</sub> /cm <sup>3</sup>          | 1.159                                                         |
| μ/mm <sup>-1</sup>                          | 0.569                                                         |
| F(000)                                      | 624.0                                                         |
| Crystal size/mm <sup>3</sup>                | 0.13 × 0.13 × 0.12                                            |
| Radiation                                   | Cu Kα (λ = 1.54184)                                           |
| 2θ range for data collection/°              | 7.982 to 154.694                                              |
| Index ranges                                | -7 ≤ h ≤ 3, -17 ≤ k ≤ 18, -21 ≤ l ≤ 21                        |
| Reflections collected                       | 5454                                                          |
| Independent reflections                     | 2925 [R <sub>int</sub> = 0.0741, R <sub>sigma</sub> = 0.0814] |
| Data/restraints/parameters                  | 2925/0/194                                                    |
| Goodness-of-fit on F <sup>2</sup>           | 1.043                                                         |
| Final R indexes [I >= 2σ (I)]               | R <sub>1</sub> = 0.0541, wR <sub>2</sub> = 0.1472             |
| Final R indexes [all data]                  | R <sub>1</sub> = 0.0580, wR <sub>2</sub> = 0.1513             |
| Largest diff. peak/hole / e Å <sup>-3</sup> | 0.33/-0.32                                                    |
| Flack parameter                             | 0.04(18)                                                      |

## 6.2 X-Ray crystallography of natural (-)-7 $\alpha$ ,8 $\beta$ -hydroxy-12 $\beta$ -cyclobakuchiol C (1b)

The crystal of natural (-)-7 $\alpha$ ,8 $\beta$ -hydroxy-12 $\beta$ -cyclobakuchiol C (**1b**) for X-ray diffraction study was obtained through the dissolving of compound in ethyl acetate and petroleum ether, followed by slow evaporation of the solvent at room temperature. X-ray data collections were performed in an Agilent Super Nova.

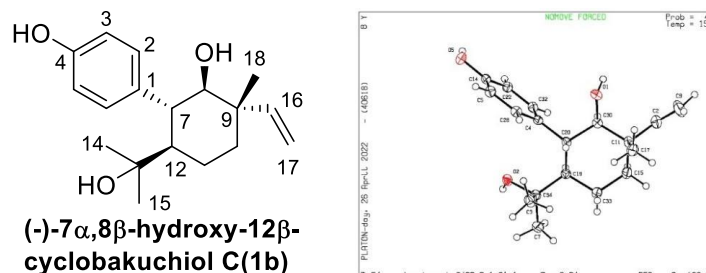

**Figure S1.** X-Ray coordinate of natural (-)-7 $\alpha$ ,8 $\beta$ -hydroxy-12 $\beta$ -cyclobakuchiol C (**1b**) (CCDC 2226760). Displacement ellipsoids are scaled to the 30% probability level.

|                                             |                                                                               |
|---------------------------------------------|-------------------------------------------------------------------------------|
| Identification code                         | (-)-7 $\alpha$ ,8 $\beta$ -hydroxy-12 $\beta$ -cyclobakuchiol C ( <b>1b</b> ) |
| Empirical formula                           | C <sub>37</sub> H <sub>56</sub> O <sub>7</sub>                                |
| Formula weight                              | 612.81                                                                        |
| Temperature/K                               | 150.00(10)                                                                    |
| Crystal system                              | monoclinic                                                                    |
| Space group                                 | P2 <sub>1</sub>                                                               |
| a/Å                                         | 15.3362(3)                                                                    |
| b/Å                                         | 6.95130(12)                                                                   |
| c/Å                                         | 16.3195(3)                                                                    |
| $\alpha$ /°                                 | 90                                                                            |
| $\beta$ /°                                  | 101.0819(18)                                                                  |
| $\gamma$ /°                                 | 90                                                                            |
| Volume/Å <sup>3</sup>                       | 1707.32(5)                                                                    |
| Z                                           | 2                                                                             |
| $\rho$ calg/cm <sup>3</sup>                 | 1.192                                                                         |
| $\mu$ /mm <sup>-1</sup>                     | 0.643                                                                         |
| F(000)                                      | 668.0                                                                         |
| Crystal size/mm <sup>3</sup>                | 0.14 × 0.13 × 0.12                                                            |
| Radiation                                   | Cu K $\alpha$ ( $\lambda$ = 1.54184)                                          |
| 2 $\theta$ range for data collection/°      | 5.518 to 154.338                                                              |
| Index ranges                                | -19 ≤ h ≤ 19, -7 ≤ k ≤ 8, -20 ≤ l ≤ 20                                        |
| Reflections collected                       | 16825                                                                         |
| Independent reflections                     | 6125 [R <sub>int</sub> = 0.0500, R <sub>sigma</sub> = 0.0468]                 |
| Data/restraints/parameters                  | 6125/1/445                                                                    |
| Goodness-of-fit on F <sup>2</sup>           | 1.060                                                                         |
| Final R indexes [I ≥ 2 $\sigma$ (I)]        | R <sub>1</sub> = 0.0401, wR <sub>2</sub> = 0.1058                             |
| Final R indexes [all data]                  | R <sub>1</sub> = 0.0421, wR <sub>2</sub> = 0.1075                             |
| Largest diff. peak/hole / e Å <sup>-3</sup> | 0.22/-0.23                                                                    |
| Flack parameter                             | 0.22(13)                                                                      |

### 6.3 X-Ray crystallography of compound 11

The crystal of compound **11** for X-ray diffraction study was obtained through the dissolving of compound in petroleum ether and ethyl acetate, followed by slow evaporation of the solvent at room temperature. X-ray data collections were performed in an Agilent Super Nova.

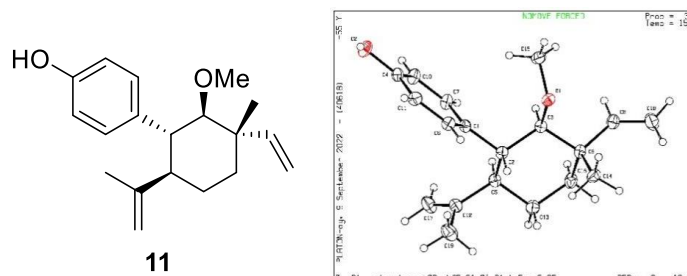

**Figure S1.** X-Ray coordinate of compound **11** (CCDC 2226754). Displacement ellipsoids are scaled to the 30% probability level.

| Identification code                         | Compound <b>11</b>                                            |
|---------------------------------------------|---------------------------------------------------------------|
| Empirical formula                           | C <sub>19</sub> H <sub>26</sub> O <sub>2</sub>                |
| Formula weight                              | 286.40                                                        |
| Temperature/K                               | 149.99(10)                                                    |
| Crystal system                              | orthorhombic                                                  |
| Space group                                 | P2 <sub>1</sub> 2 <sub>1</sub> 2 <sub>1</sub>                 |
| a/Å                                         | 6.1934(2)                                                     |
| b/Å                                         | 13.5942(4)                                                    |
| c/Å                                         | 20.6761(6)                                                    |
| α/°                                         | 90                                                            |
| β/°                                         | 90                                                            |
| γ/°                                         | 90                                                            |
| Volume/Å <sup>3</sup>                       | 1740.81(9)                                                    |
| Z                                           | 4                                                             |
| ρ <sub>calc</sub> /cm <sup>3</sup>          | 1.093                                                         |
| μ/mm <sup>-1</sup>                          | 0.536                                                         |
| F(000)                                      | 624.0                                                         |
| Crystal size/mm <sup>3</sup>                | 0.11 × 0.03 × 0.02                                            |
| Radiation                                   | Cu Kα (λ = 1.54184)                                           |
| 2θ range for data collection/°              | 7.784 to 155.622                                              |
| Index ranges                                | -5 ≤ h ≤ 7, -16 ≤ k ≤ 16, -24 ≤ l ≤ 26                        |
| Reflections collected                       | 8246                                                          |
| Independent reflections                     | 3406 [R <sub>int</sub> = 0.0619, R <sub>sigma</sub> = 0.0610] |
| Data/restraints/parameters                  | 3406/0/194                                                    |
| Goodness-of-fit on F <sup>2</sup>           | 1.103                                                         |
| Final R indexes [I >= 2σ (I)]               | R <sub>1</sub> = 0.0519, wR <sub>2</sub> = 0.1406             |
| Final R indexes [all data]                  | R <sub>1</sub> = 0.0615, wR <sub>2</sub> = 0.1477             |
| Largest diff. peak/hole / e Å <sup>-3</sup> | 0.26/-0.23                                                    |
| Flack parameter                             | -0.1(2)                                                       |



## 6.4 X-Ray crystallography of compound **14**

The crystal of compound **14** for X-ray diffraction study was obtained through the dissolving of compound in petroleum ether and ethyl acetate, followed by slow evaporation of the solvent at room temperature. X-ray data collections were performed in an Agilent Super Nova.

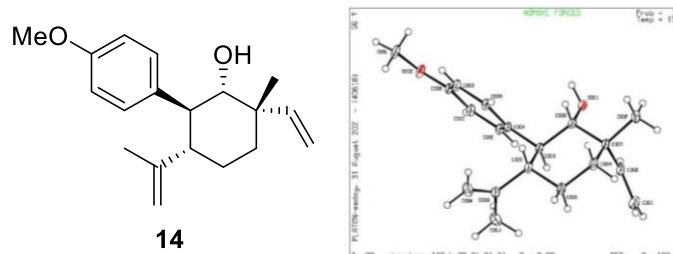

**Figure S1.** X-Ray coordinate of compound **14** (CCDC 2226756). Displacement ellipsoids are scaled to the 30% probability level.

| Identification code                         | Compound <b>14</b>                                            |
|---------------------------------------------|---------------------------------------------------------------|
| Empirical formula                           | C <sub>19</sub> H <sub>26</sub> O <sub>2</sub>                |
| Formula weight                              | 286.40                                                        |
| Temperature/K                               | 149.99(10)                                                    |
| Crystal system                              | orthorhombic                                                  |
| Space group                                 | P2 <sub>1</sub> 2 <sub>1</sub> 2 <sub>1</sub>                 |
| a/Å                                         | 6.02770(10)                                                   |
| b/Å                                         | 10.7851(2)                                                    |
| c/Å                                         | 25.2404(4)                                                    |
| α/°                                         | 90                                                            |
| β/°                                         | 90                                                            |
| γ/°                                         | 90                                                            |
| Volume/Å <sup>3</sup>                       | 1640.86(5)                                                    |
| Z                                           | 4                                                             |
| ρ <sub>calc</sub> /cm <sup>3</sup>          | 1.159                                                         |
| μ/mm <sup>-1</sup>                          | 0.569                                                         |
| F(000)                                      | 624.0                                                         |
| Crystal size/mm <sup>3</sup>                | 0.16 × 0.15 × 0.12                                            |
| Radiation                                   | Cu Kα (λ = 1.54184)                                           |
| 2θ range for data collection/°              | 7.004 to 154.842                                              |
| Index ranges                                | -4 ≤ h ≤ 7, -13 ≤ k ≤ 13, -31 ≤ l ≤ 26                        |
| Reflections collected                       | 8138                                                          |
| Independent reflections                     | 3260 [R <sub>int</sub> = 0.0874, R <sub>sigma</sub> = 0.0730] |
| Data/restraints/parameters                  | 3260/0/194                                                    |
| Goodness-of-fit on F <sup>2</sup>           | 1.068                                                         |
| Final R indexes [I ≥ 2σ (I)]                | R <sub>1</sub> = 0.0792, wR <sub>2</sub> = 0.1914             |
| Final R indexes [all data]                  | R <sub>1</sub> = 0.0814, wR <sub>2</sub> = 0.1933             |
| Largest diff. peak/hole / e Å <sup>-3</sup> | 0.45/-0.52                                                    |
| Flack parameter                             | -0.1(2)                                                       |

## 6.5 X-Ray crystallography of compound 14'

The crystal of compound **14'** for X-ray diffraction study was obtained through the dissolving of compound in petroleum ether and ethyl acetate, followed by slow evaporation of the solvent at room temperature. X-ray data collections were performed in an Agilent Super Nova.

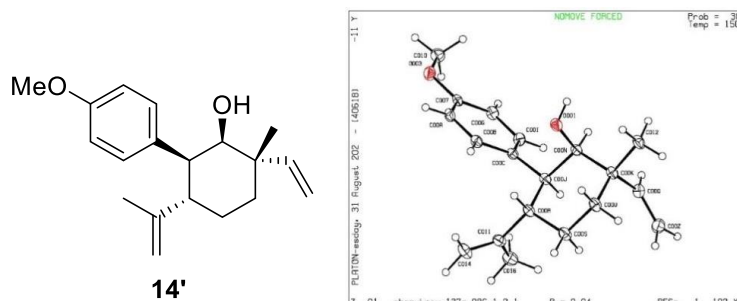

**Figure S1.** X-Ray coordinate of compound **14'** (CCDC 2226759). Displacement ellipsoids are scaled to the 30% probability level.

|                                             |                                                               |
|---------------------------------------------|---------------------------------------------------------------|
| Identification code                         | compound <b>14'</b>                                           |
| Empirical formula                           | C <sub>38</sub> H <sub>52</sub> O <sub>4</sub>                |
| Formula weight                              | 572.79                                                        |
| Temperature/K                               | 150.00(10)                                                    |
| Crystal system                              | monoclinic                                                    |
| Space group                                 | C2                                                            |
| a/Å                                         | 25.3714(5)                                                    |
| b/Å                                         | 6.05801(10)                                                   |
| c/Å                                         | 23.3168(5)                                                    |
| α/°                                         | 90                                                            |
| β/°                                         | 112.787(2)                                                    |
| γ/°                                         | 90                                                            |
| Volume/Å <sup>3</sup>                       | 3304.08(12)                                                   |
| Z                                           | 4                                                             |
| ρ <sub>calc</sub> /cm <sup>3</sup>          | 1.151                                                         |
| μ/mm <sup>-1</sup>                          | 0.565                                                         |
| F(000)                                      | 1248.0                                                        |
| Crystal size/mm <sup>3</sup>                | 0.25 × 0.16 × 0.15                                            |
| Radiation                                   | Cu Kα (λ = 1.54184)                                           |
| 2θ range for data collection/°              | 4.11 to 154.916                                               |
| Index ranges                                | -31 ≤ h ≤ 31, -6 ≤ k ≤ 7, -26 ≤ l ≤ 29                        |
| Reflections collected                       | 19488                                                         |
| Independent reflections                     | 6149 [R <sub>int</sub> = 0.0678, R <sub>sigma</sub> = 0.0565] |
| Data/restraints/parameters                  | 6149/2/393                                                    |
| Goodness-of-fit on F <sup>2</sup>           | 1.069                                                         |
| Final R indexes [I >= 2σ (I)]               | R <sub>1</sub> = 0.0446, wR <sub>2</sub> = 0.1146             |
| Final R indexes [all data]                  | R <sub>1</sub> = 0.0474, wR <sub>2</sub> = 0.1169             |
| Largest diff. peak/hole / e Å <sup>-3</sup> | 0.18/-0.25                                                    |
| Flack parameter                             | 0.03(18)                                                      |

## 6.6 X-Ray crystallography of natural (-)-corypsoriol H (1e)

The crystal of (-)-corypsoriol H (**1e**) for X-ray diffraction study was obtained through the dissolving of compound in MeOH, CH<sub>2</sub>Cl<sub>2</sub> and petroleum ether, followed by slow evaporation of the solvent at room temperature. X-ray data collections were performed in an Agilent Super Nova.

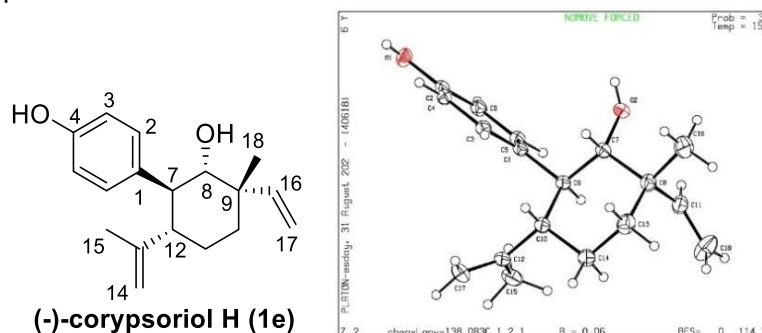

**Figure S1.** X-Ray coordinate of (-)-corypsoriol H (**1e**) (CCDC 2226749). Displacement ellipsoids are scaled to the 30% probability level.

| Identification code                         | (-)-corypsoriol H ( <b>1e</b> )                               |
|---------------------------------------------|---------------------------------------------------------------|
| Empirical formula                           | C <sub>18</sub> H <sub>25</sub> O <sub>2</sub>                |
| Formula weight                              | 281.38                                                        |
| Temperature/K                               | 150.00(10)                                                    |
| Crystal system                              | monoclinic                                                    |
| Space group                                 | C2                                                            |
| a/Å                                         | 17.9138(6)                                                    |
| b/Å                                         | 6.1604(2)                                                     |
| c/Å                                         | 15.2956(6)                                                    |
| α/°                                         | 90                                                            |
| β/°                                         | 106.418(4)                                                    |
| γ/°                                         | 90                                                            |
| Volume/Å <sup>3</sup>                       | 1619.14(10)                                                   |
| Z                                           | 4                                                             |
| ρ <sub>calc</sub> /cm <sup>3</sup>          | 1.154                                                         |
| μ/mm <sup>-1</sup>                          | 0.592                                                         |
| F(000)                                      | 612.0                                                         |
| Crystal size/mm <sup>3</sup>                | 0.3 × 0.26 × 0.24                                             |
| Radiation                                   | Cu Kα (λ = 1.54184)                                           |
| 2θ range for data collection/°              | 6.024 to 154.302                                              |
| Index ranges                                | -22 ≤ h ≤ 22, -7 ≤ k ≤ 7, -18 ≤ l ≤ 19                        |
| Reflections collected                       | 7068                                                          |
| Independent reflections                     | 2909 [R <sub>int</sub> = 0.0811, R <sub>sigma</sub> = 0.0806] |
| Data/restraints/parameters                  | 2909/1/193                                                    |
| Goodness-of-fit on F <sup>2</sup>           | 1.041                                                         |
| Final R indexes [I ≥ 2σ (I)]                | R <sub>1</sub> = 0.0562, wR <sub>2</sub> = 0.1412             |
| Final R indexes [all data]                  | R <sub>1</sub> = 0.0626, wR <sub>2</sub> = 0.1477             |
| Largest diff. peak/hole / e Å <sup>-3</sup> | 0.31/-0.27                                                    |
| Flack parameter                             | 0.0(2)                                                        |

## 6.7 X-Ray crystallography of proposed corypsoriol I (1h)

The crystal of proposed (-)-corypsoriol I (**1h**) for X-ray diffraction study was obtained through the dissolving of compound in  $\text{CHCl}_3$ , ethyl acetate and petroleum ether, followed by slow evaporation of the solvent at room temperature. X-ray data collections were performed in an Agilent Super Nova.

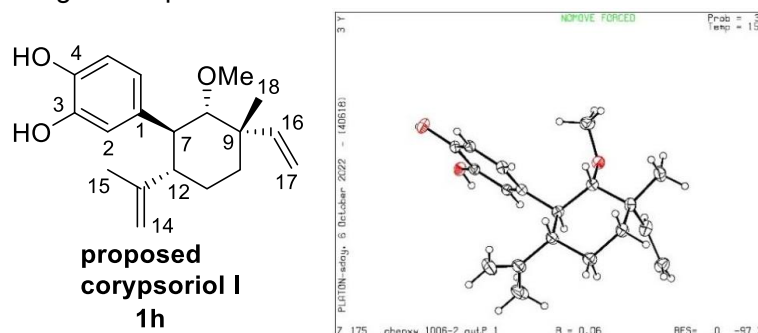

**Figure S1.** X-Ray coordinate of proposed corypsoriol I (**1h**) (CCDC 2226751).

Displacement ellipsoids are scaled to the 30% probability level.

| Identification code                            | Proposed corypsoriol I ( <b>1h</b> )                           |
|------------------------------------------------|----------------------------------------------------------------|
| Empirical formula                              | $\text{C}_{76}\text{H}_{104}\text{O}_{12}$                     |
| Formula weight                                 | 1209.59                                                        |
| Temperature/K                                  | 149.99(10)                                                     |
| Crystal system                                 | triclinic                                                      |
| Space group                                    | P1                                                             |
| a/Å                                            | 9.51230(10)                                                    |
| b/Å                                            | 11.7533(2)                                                     |
| c/Å                                            | 16.8232(2)                                                     |
| $\alpha/^\circ$                                | 109.4870(10)                                                   |
| $\beta/^\circ$                                 | 90.4410(10)                                                    |
| $\gamma/^\circ$                                | 100.6710(10)                                                   |
| Volume/Å <sup>3</sup>                          | 1737.54(4)                                                     |
| Z                                              | 1                                                              |
| $\rho_{\text{calc}}/\text{cm}^3$               | 1.156                                                          |
| $\mu/\text{mm}^{-1}$                           | 0.607                                                          |
| F(000)                                         | 656.0                                                          |
| Crystal size/mm <sup>3</sup>                   | 0.16 × 0.13 × 0.12                                             |
| Radiation                                      | Cu K $\alpha$ ( $\lambda = 1.54184$ )                          |
| 2 $\theta$ range for data collection/ $^\circ$ | 5.588 to 153.732                                               |
| Index ranges                                   | -11 ≤ h ≤ 10, -14 ≤ k ≤ 14, -20 ≤ l ≤ 20                       |
| Reflections collected                          | 59003                                                          |
| Independent reflections                        | 12367 [R <sub>int</sub> = 0.0890, R <sub>sigma</sub> = 0.0529] |
| Data/restraints/parameters                     | 12367/3/859                                                    |
| Goodness-of-fit on F <sup>2</sup>              | 1.025                                                          |
| Final R indexes [ $ I  \geq 2\sigma(I)$ ]      | R <sub>1</sub> = 0.0558, wR <sub>2</sub> = 0.1411              |
| Final R indexes [all data]                     | R <sub>1</sub> = 0.0592, wR <sub>2</sub> = 0.1439              |
| Largest diff. peak/hole / e Å <sup>-3</sup>    | 0.48/-0.20                                                     |
| Flack parameter                                | 0.15(12)                                                       |

## 7. References

- 1 a) J. Y. Kang, R. G. Carter, *Org. Lett.* 2012, **14**, 3178-3181; b) J. Y. Kang, R. C. Johnston, K. M. Snyder, P. H.-Y. Cheong, R. G. Carter, *J. Org. Chem.* 2016, **81**, 3629-3637.
- 2 T. Isobe, K. Fukuda, T. Tokunaga, H. Seki, K. Yamaguchi, T. Ishikawa, *J. Org. Chem.* 2000, **65**, 7774-7778.
- 3 K. C. Nicolaou, T. Montagnon, P. S. Baran, Y. L. Zhong, *J. Am. Chem. Soc.* 2002, **124**, 2245-2258.
- 4 Y. Liu, S. C. Virgil, R. H. Grubbs, B. M. Stoltz, *Angew. Chem. Int. Ed.* 2015, **54**, 11800-11803. *Angew. Chem.* 2015, **127**, 11966-11969.
- 5 J.-L. Pan, T. Chen, Z.-Q. Zhang, Y.-F. Li, X.-M. Zhang, F.-M. Zhang, *Chem. Commun.* 2016, **52**, 2382-2385.
- 6 M. Zhu, N. Jalalian, B. Olofsson, *Synlett* 2008, 592-596.
- 7 D. Müller, A. Alexakis, *Chem. Eur. J.* 2013, **19**, 15226-15239.
- 8 X.-G. Liu, C. Zhou, E. Lin, X. Han, S. Zhang, Q. Li, H. Wang, *Angew. Chem. Int. Ed.* 2018, **57**, 13096-13100.
- 9 G. Xiao, X. Li, T. Wu, Z. Cheng, Q. Tang, T. Zhang, *Fitoterapia* 2012, **83**, 1153-1557.
- 10 M. X. Xiu, Y. M. Zhao, Y. Zhang, D. X. Xiong, D. Wang, H. S. Lee, L. Cui, *Fitoterapia* 2021, **151**, 104881-104885.
- 11 a) A. Pezzella, L. Lista, A. Napolitano, M. d'Ischia, *Tetrahedron Lett.* 2005, **46**, 3541-3544; b) M. L. Nóvoa, F. J. Salazara, C. Gámez, A. Y. Angarita, E. Tropper, N. Canudas, J. E. Villamizar, *Nat. Prod. Commun.* 2014, **9**, 355-358.
- 12 Q.-X. Xu, W. Xu, X.-W. Yang, *Tetrahedron* 2020, **76**, 131343-131348.
- 13 X.-W. Yang, Q. Lü, Q.-X. Xu, W. Xu, Y.-T. Zhang, *Chin. Trad. Herb. Drugs* 2022, **53**, 3269-3279.

## 8. Copies of $^1\text{H}$ and $^{13}\text{C}$ NMR spectra UPC<sup>2</sup> data of products

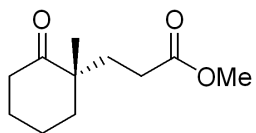

5

<sup>1</sup>H NMR (400 MHz, CDCl<sub>3</sub>)

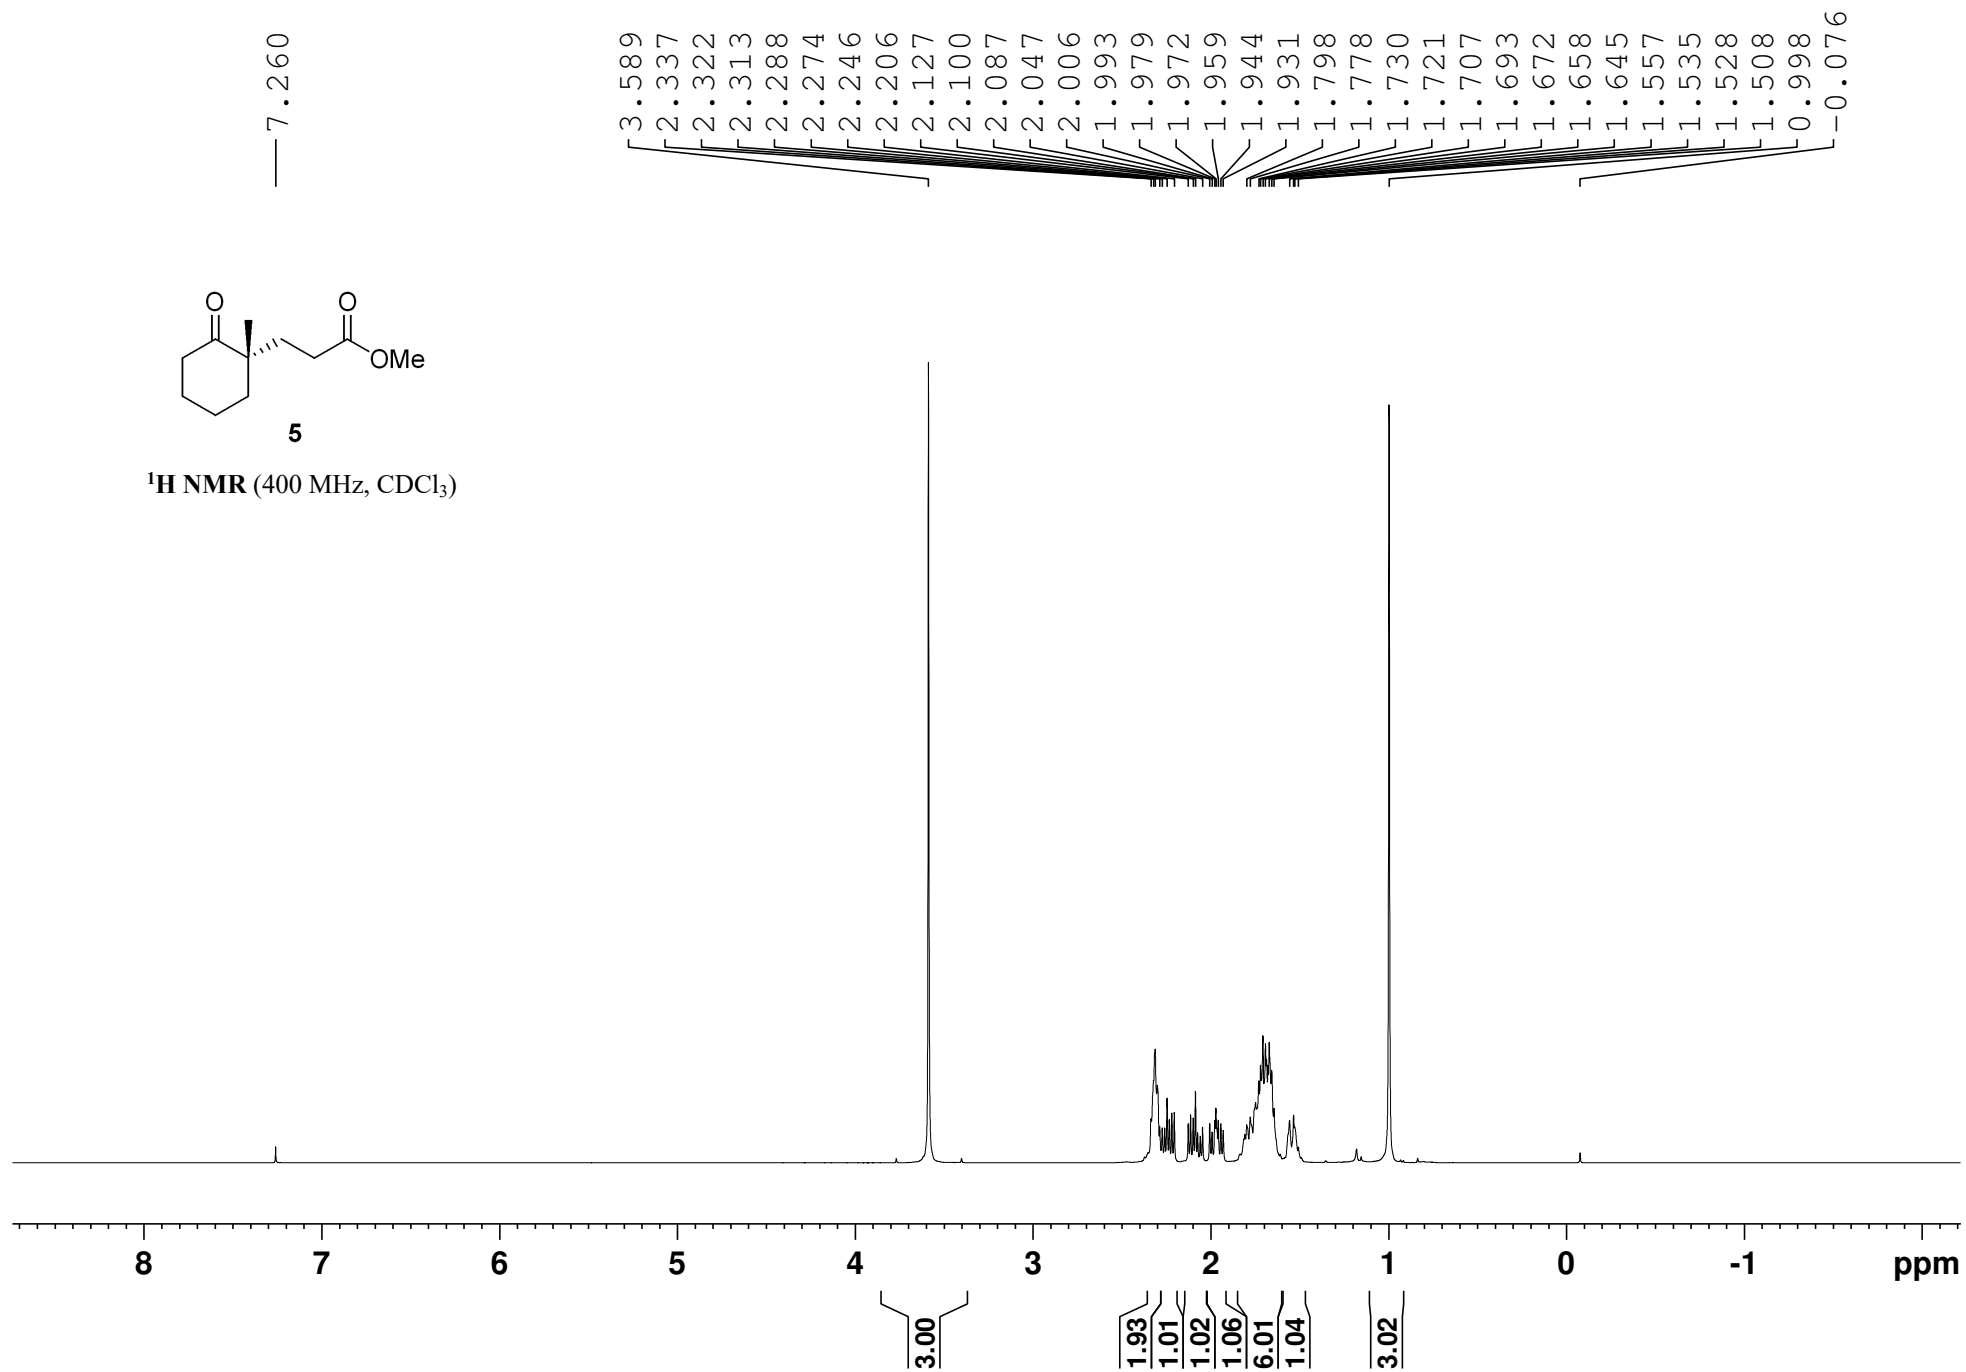

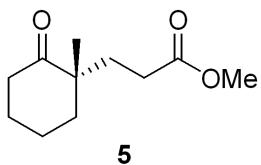

<sup>13</sup>C NMR (100 MHz, CDCl<sub>3</sub>)

— 214.76

— 173.69

77.32  
77.00  
76.68

51.31  
47.58  
38.94  
38.39  
32.19  
28.67  
27.13  
22.06  
20.69

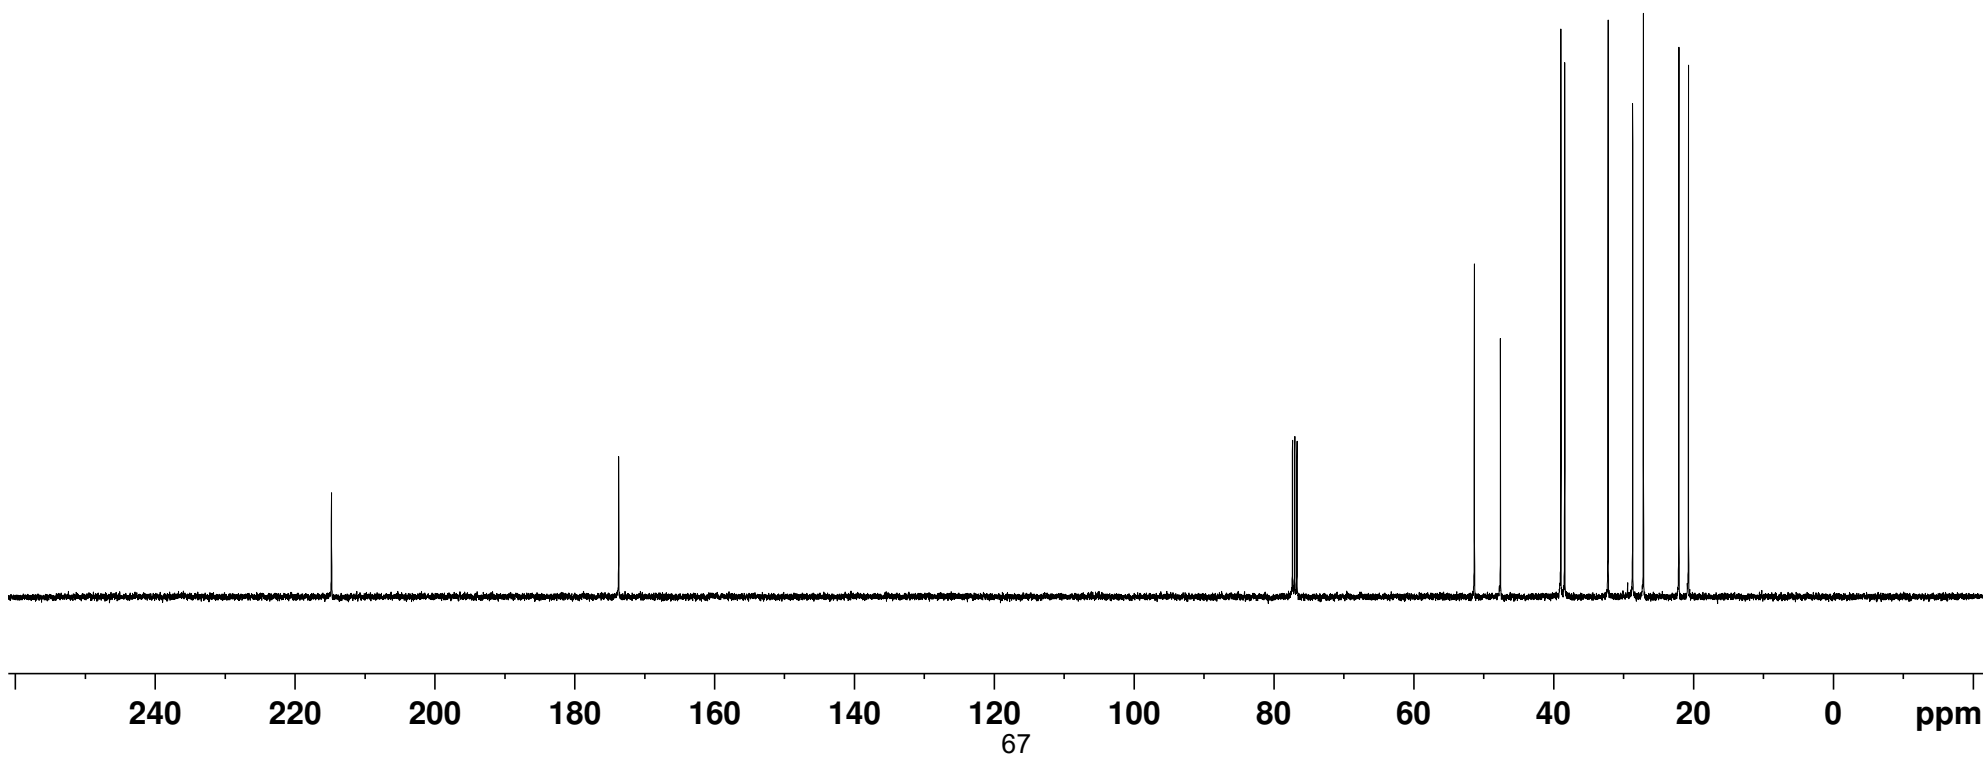

Sample Name: Compound-5-C5-9703xx      Wave Length: 297.3nm  
 Column: PDA Spectrum PDA 297.3 nm (PDA)

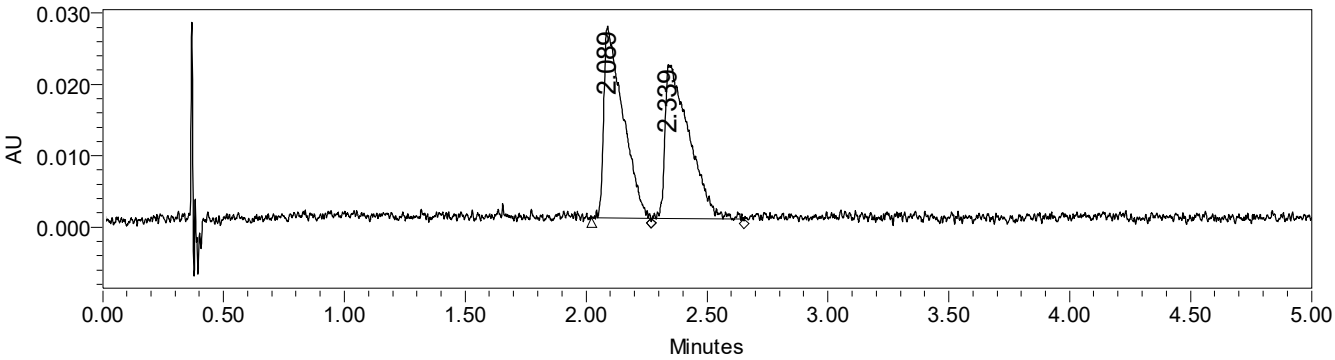

**peak information:**

|   | RetTime (min) | Area (μV*s) | Area (%) | Height (μV) |
|---|---------------|-------------|----------|-------------|
| 1 | 2.089         | 147851      | 49.60    | 26859       |
| 2 | 2.339         | 150206      | 50.40    | 21497       |



Sample Name: Compound-5-C5-9703 Wave Length: 297.3nm  
 Column: PDA Spectrum PDA 297.3 nm (PDA)

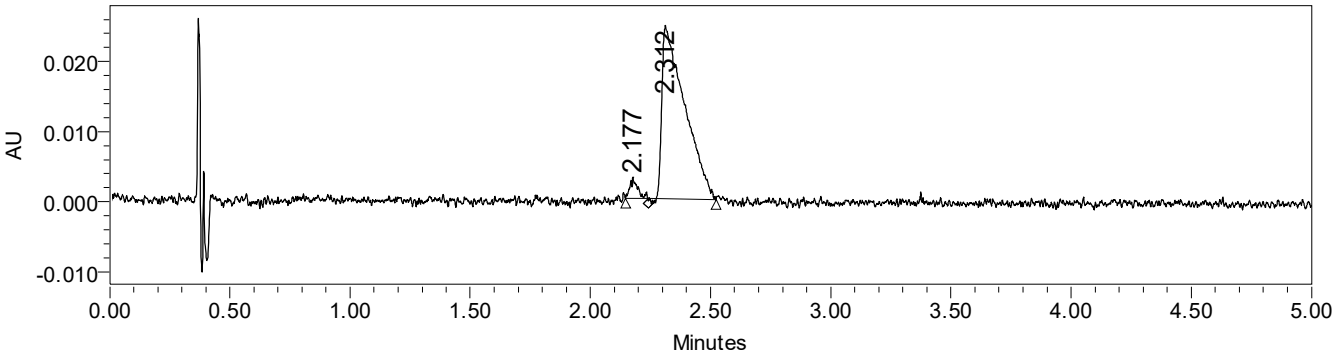

**peak information:**

|   | RetTime (min) | Area (μV*s) | Area (%) | Height (μV) |
|---|---------------|-------------|----------|-------------|
| 1 | 2.177         | 6657        | 3.90     | 2974        |
| 2 | 2.312         | 164016      | 96.10    | 24747       |

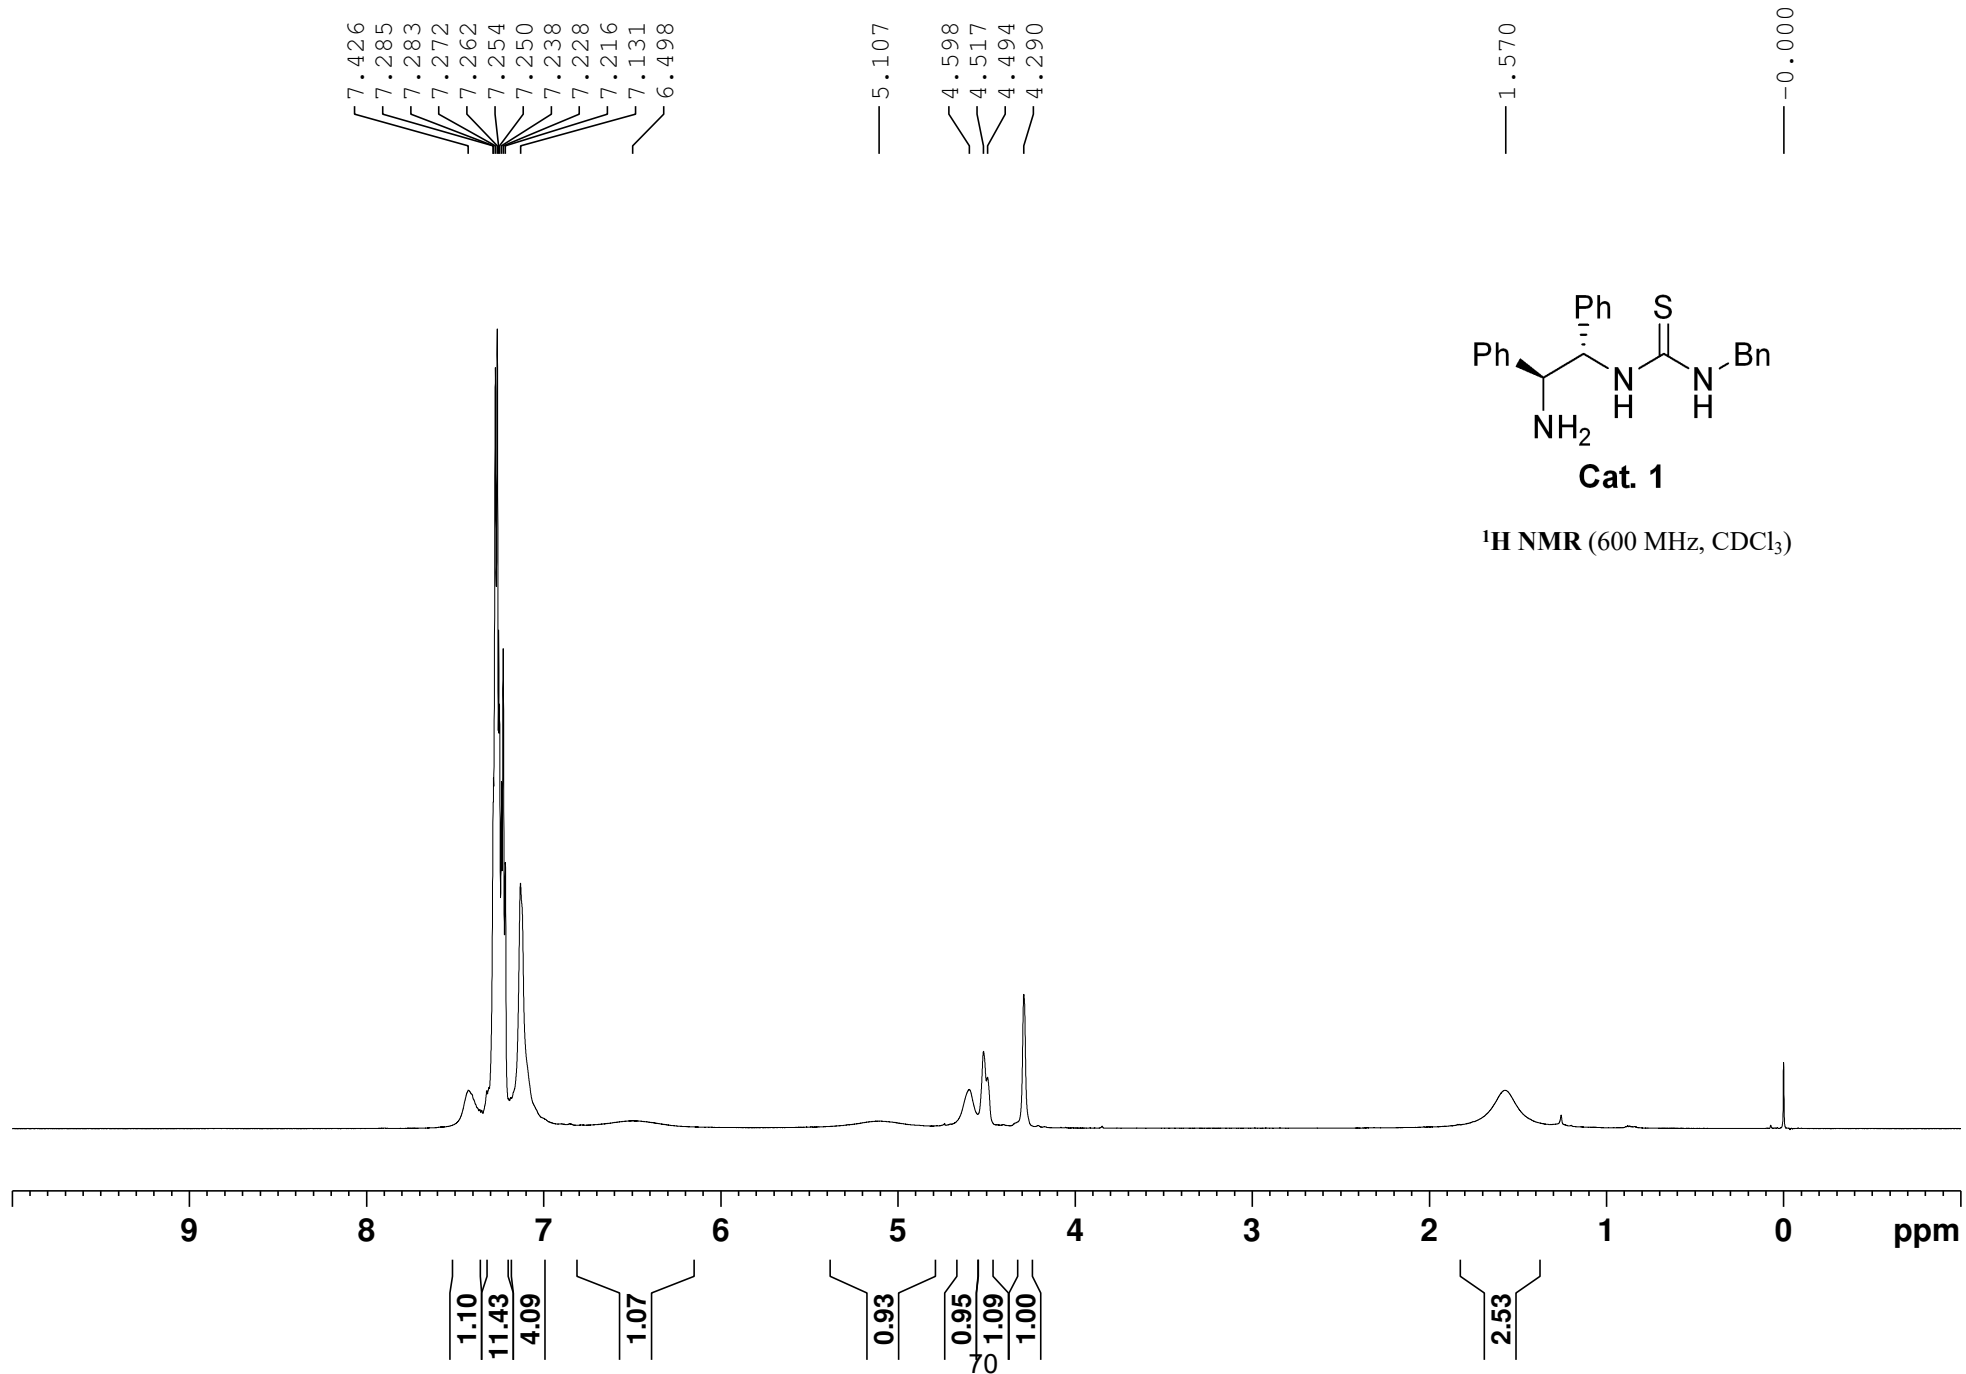

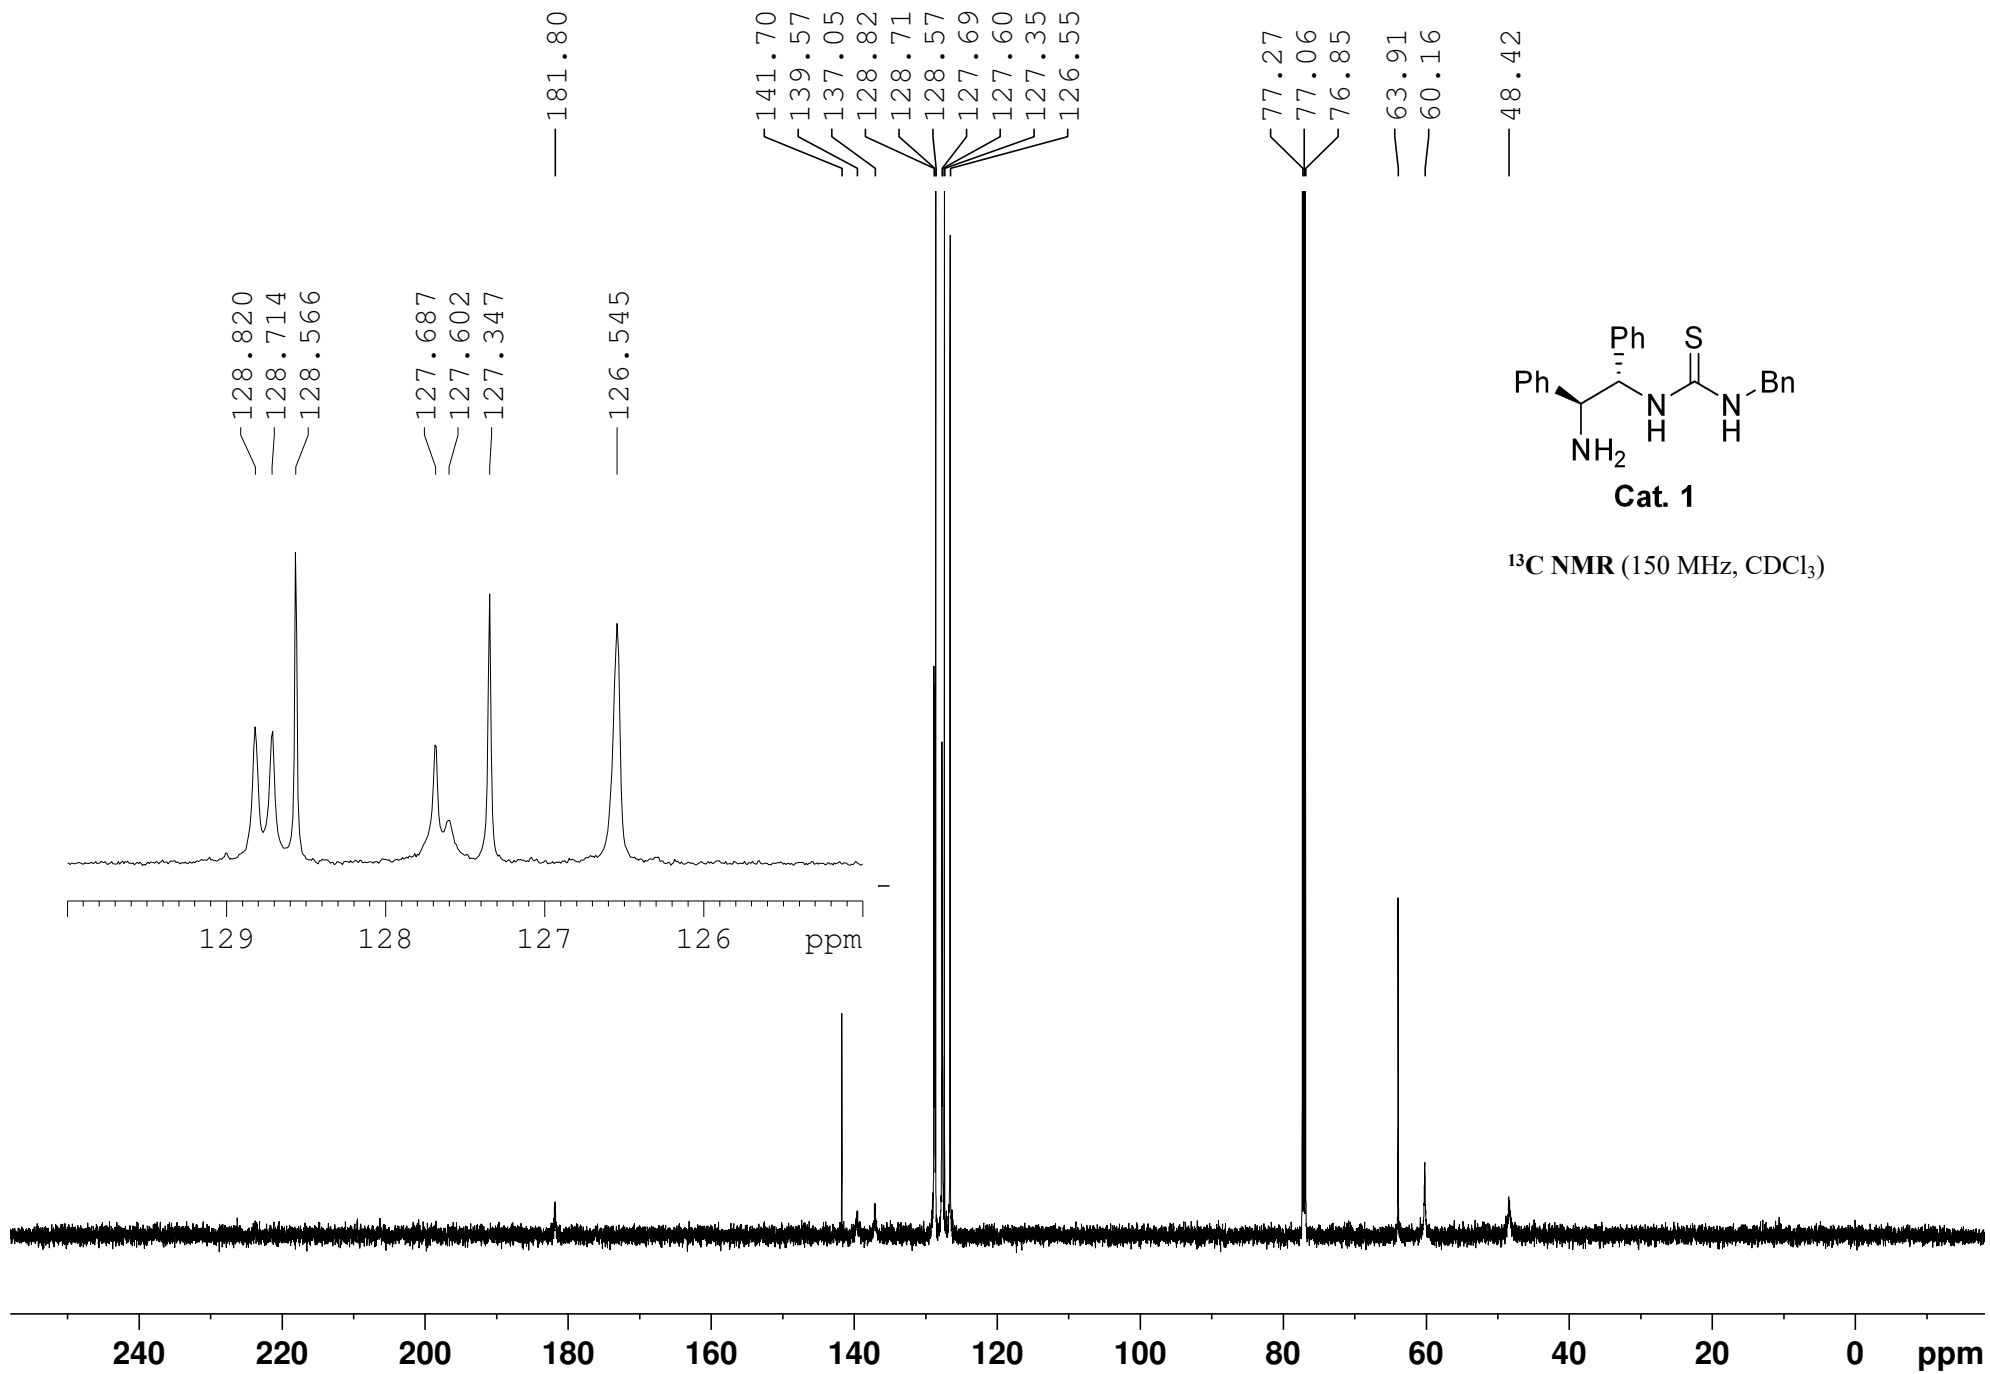

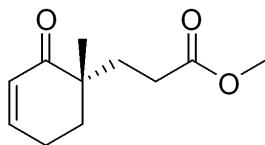

5'

<sup>1</sup>H NMR (400 MHz, CDCl<sub>3</sub>)

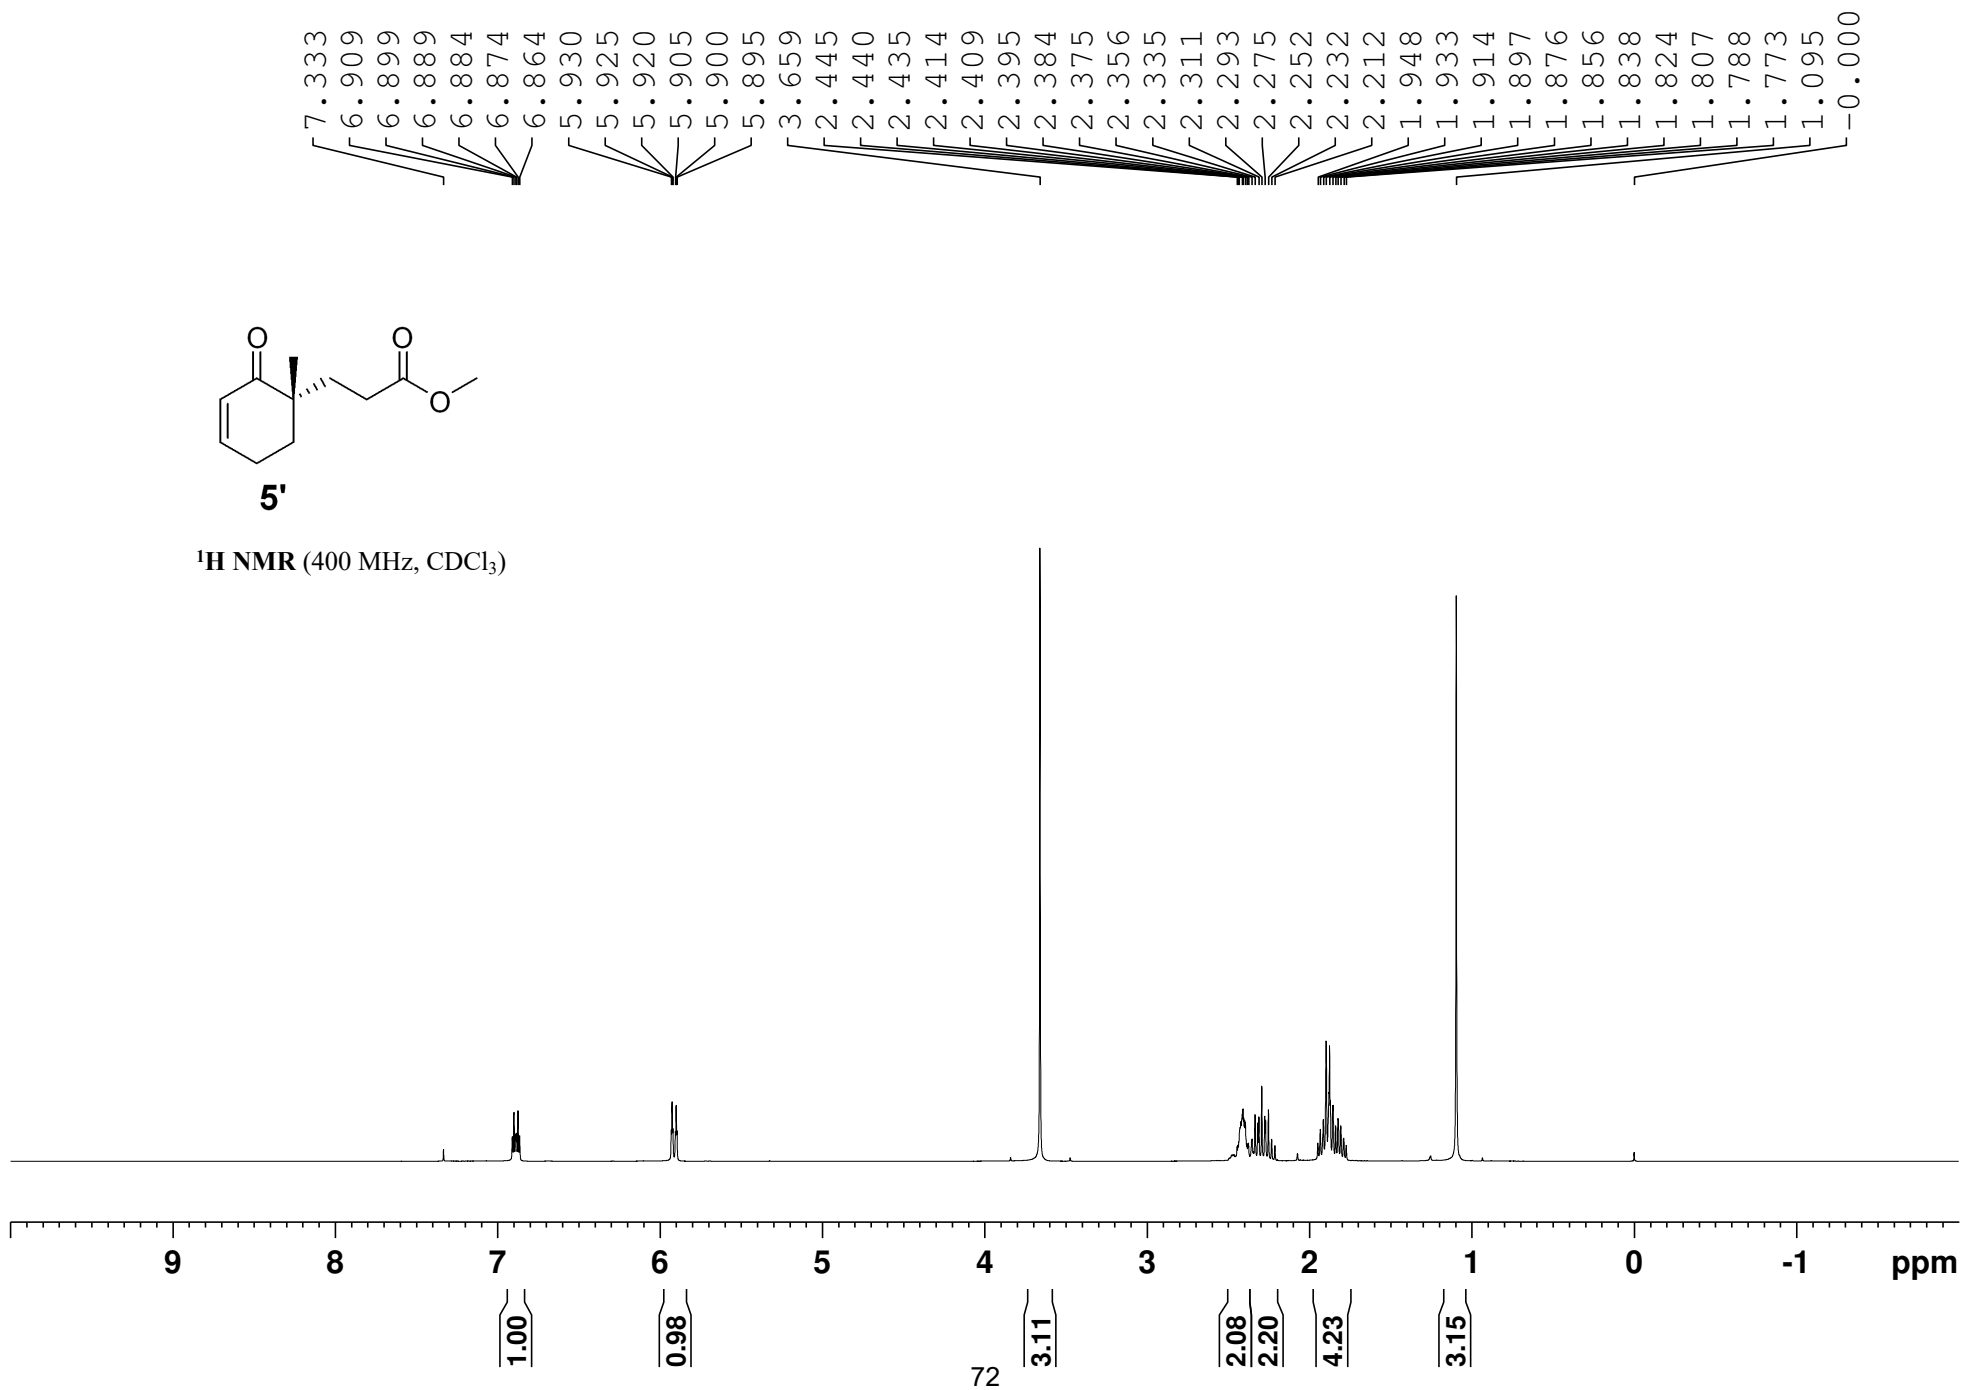

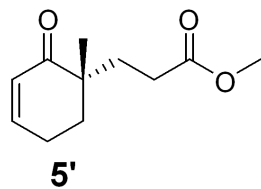

<sup>13</sup>C NMR (100 MHz, CDCl<sub>3</sub>)

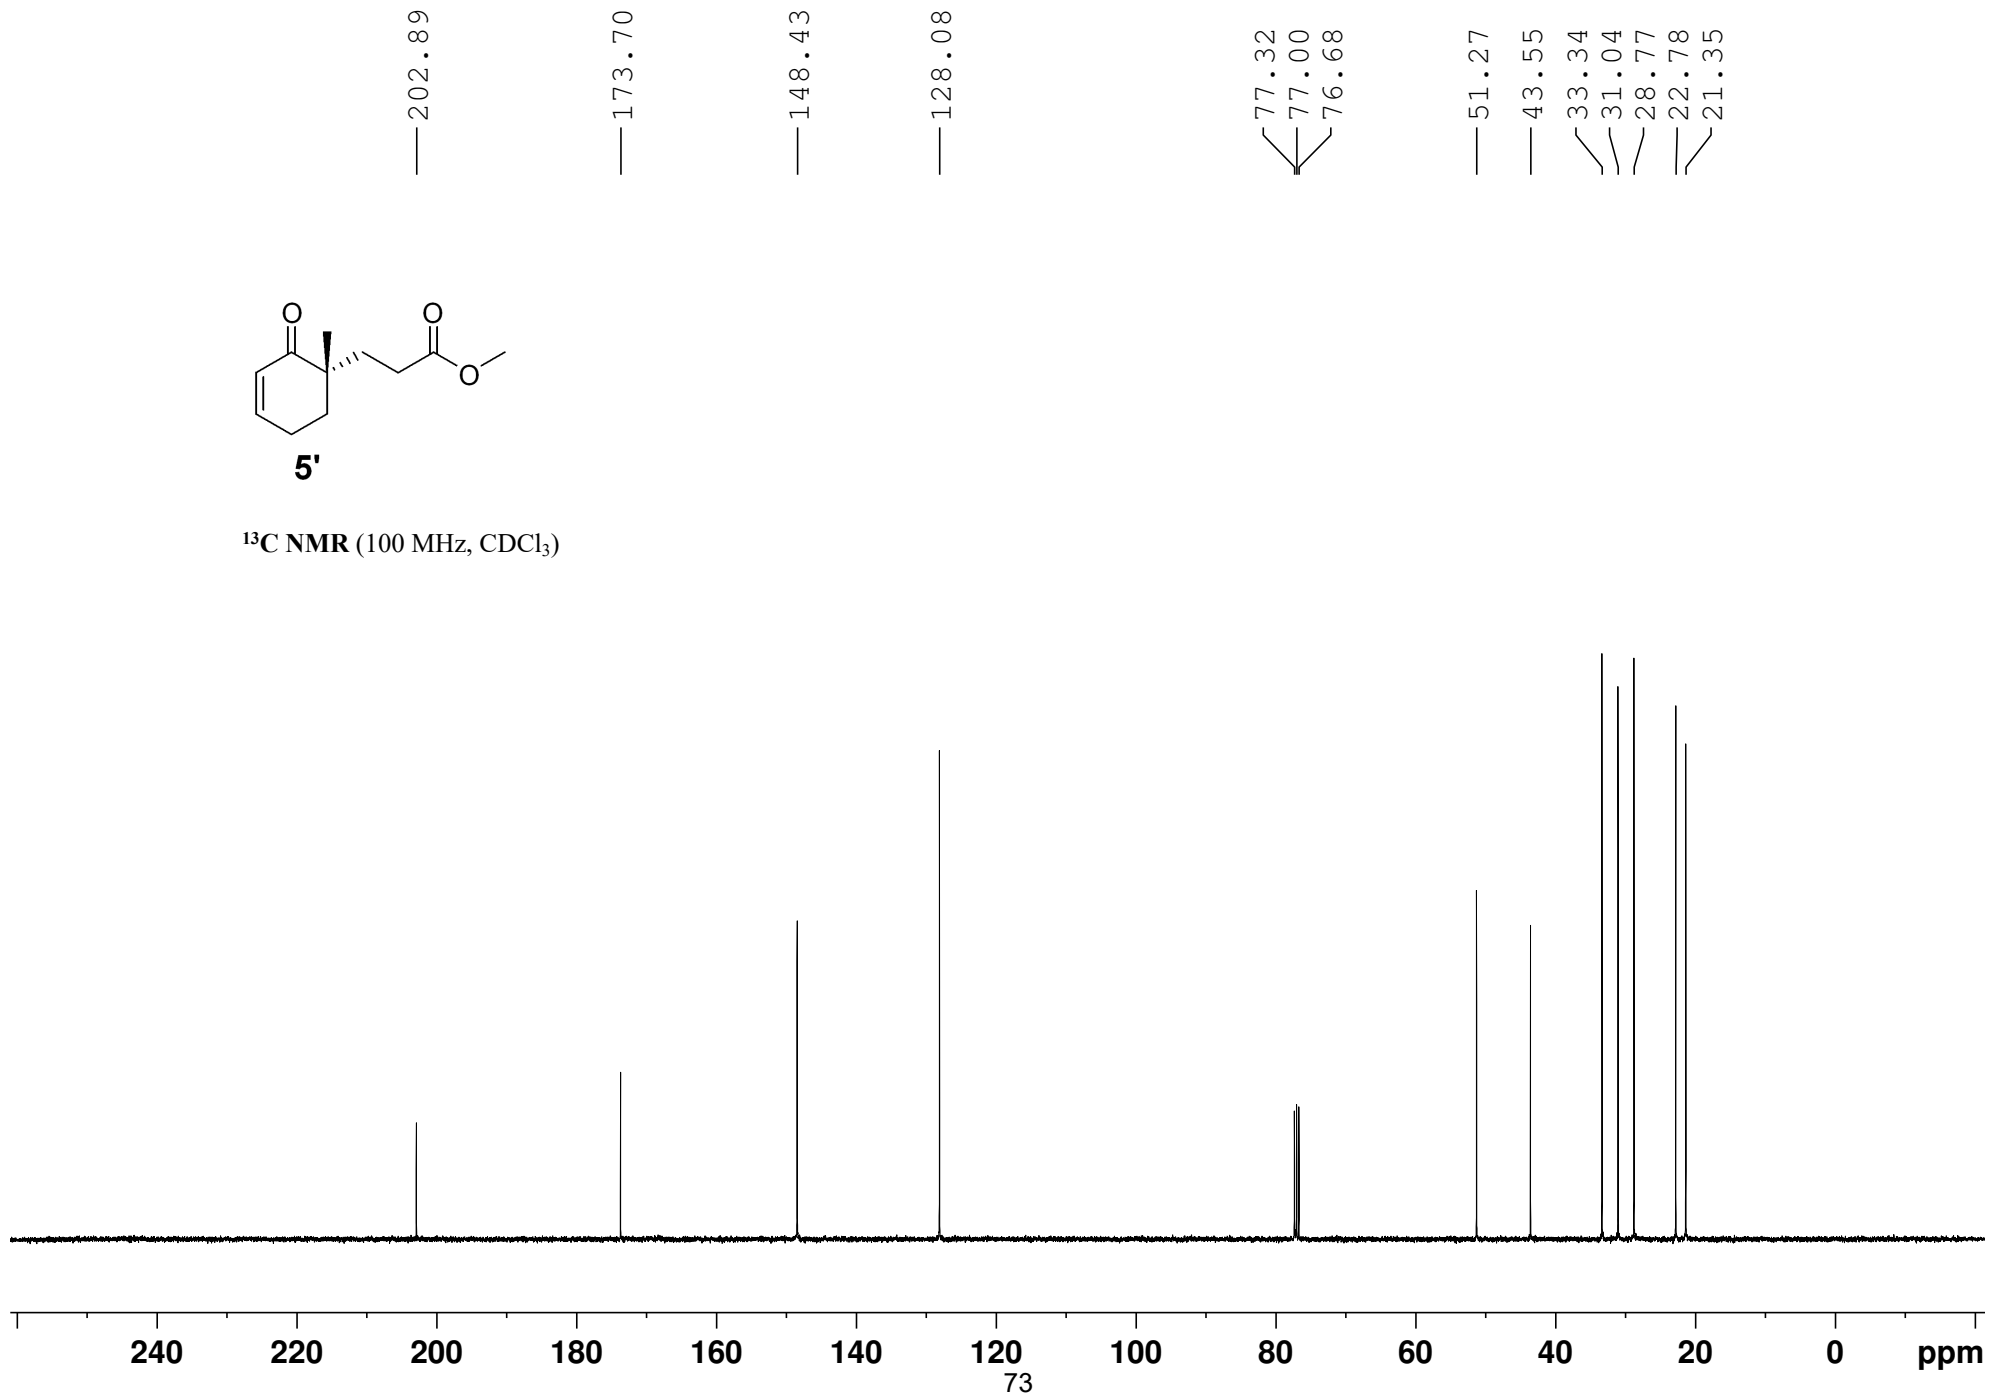

Sample Name: Compound-5'-C5-9505-xx      Wave Length: 220.0nm  
 Column: PDA Spectrum PDA 220.0 nm (PDA)

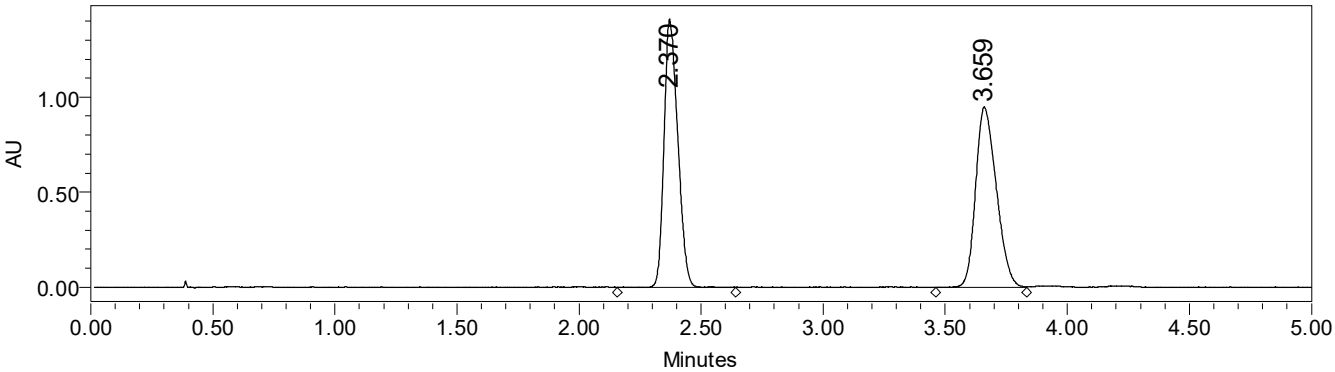

**peak information:**

|   | RetTime (min) | Area (μV*s) | Area (%) | Height (μV) |
|---|---------------|-------------|----------|-------------|
| 1 | 2.370         | 5600641     | 49.91    | 1413197     |
| 2 | 3.659         | 5619823     | 50.09    | 950410      |

Sample Name: Compound -5'-C5-9505      Wave Length: 220.0nm  
 Column: PDA Spectrum PDA 220.0 nm (PDA)

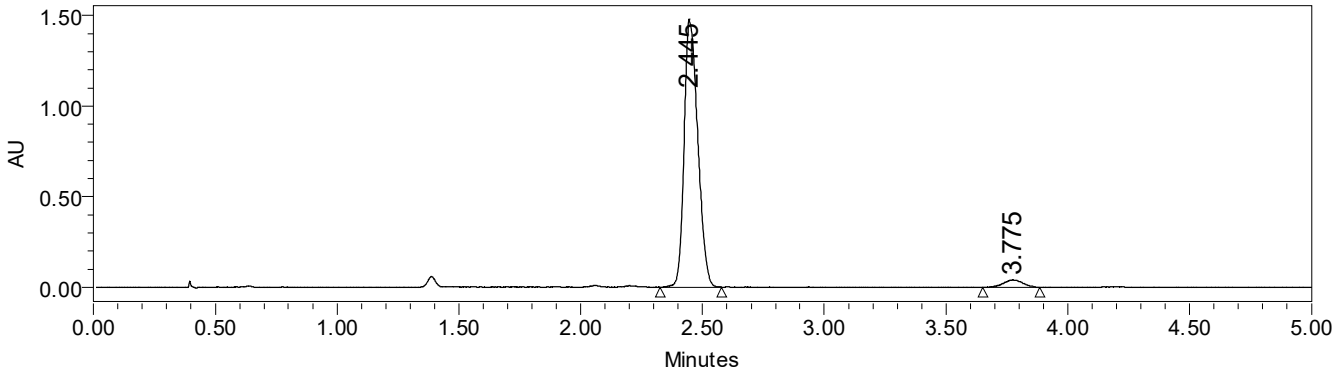

**peak information:**

|   | RetTime (min) | Area (μV*s) | Area (%) | Height (μV) |
|---|---------------|-------------|----------|-------------|
| 1 | 2.445         | 5752452     | 96.39    | 1478514     |
| 2 | 3.775         | 215153      | 3.61     | 39229       |

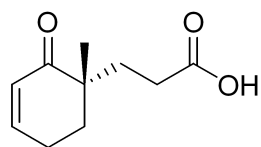

4

<sup>1</sup>H NMR (400 MHz, CDCl<sub>3</sub>)

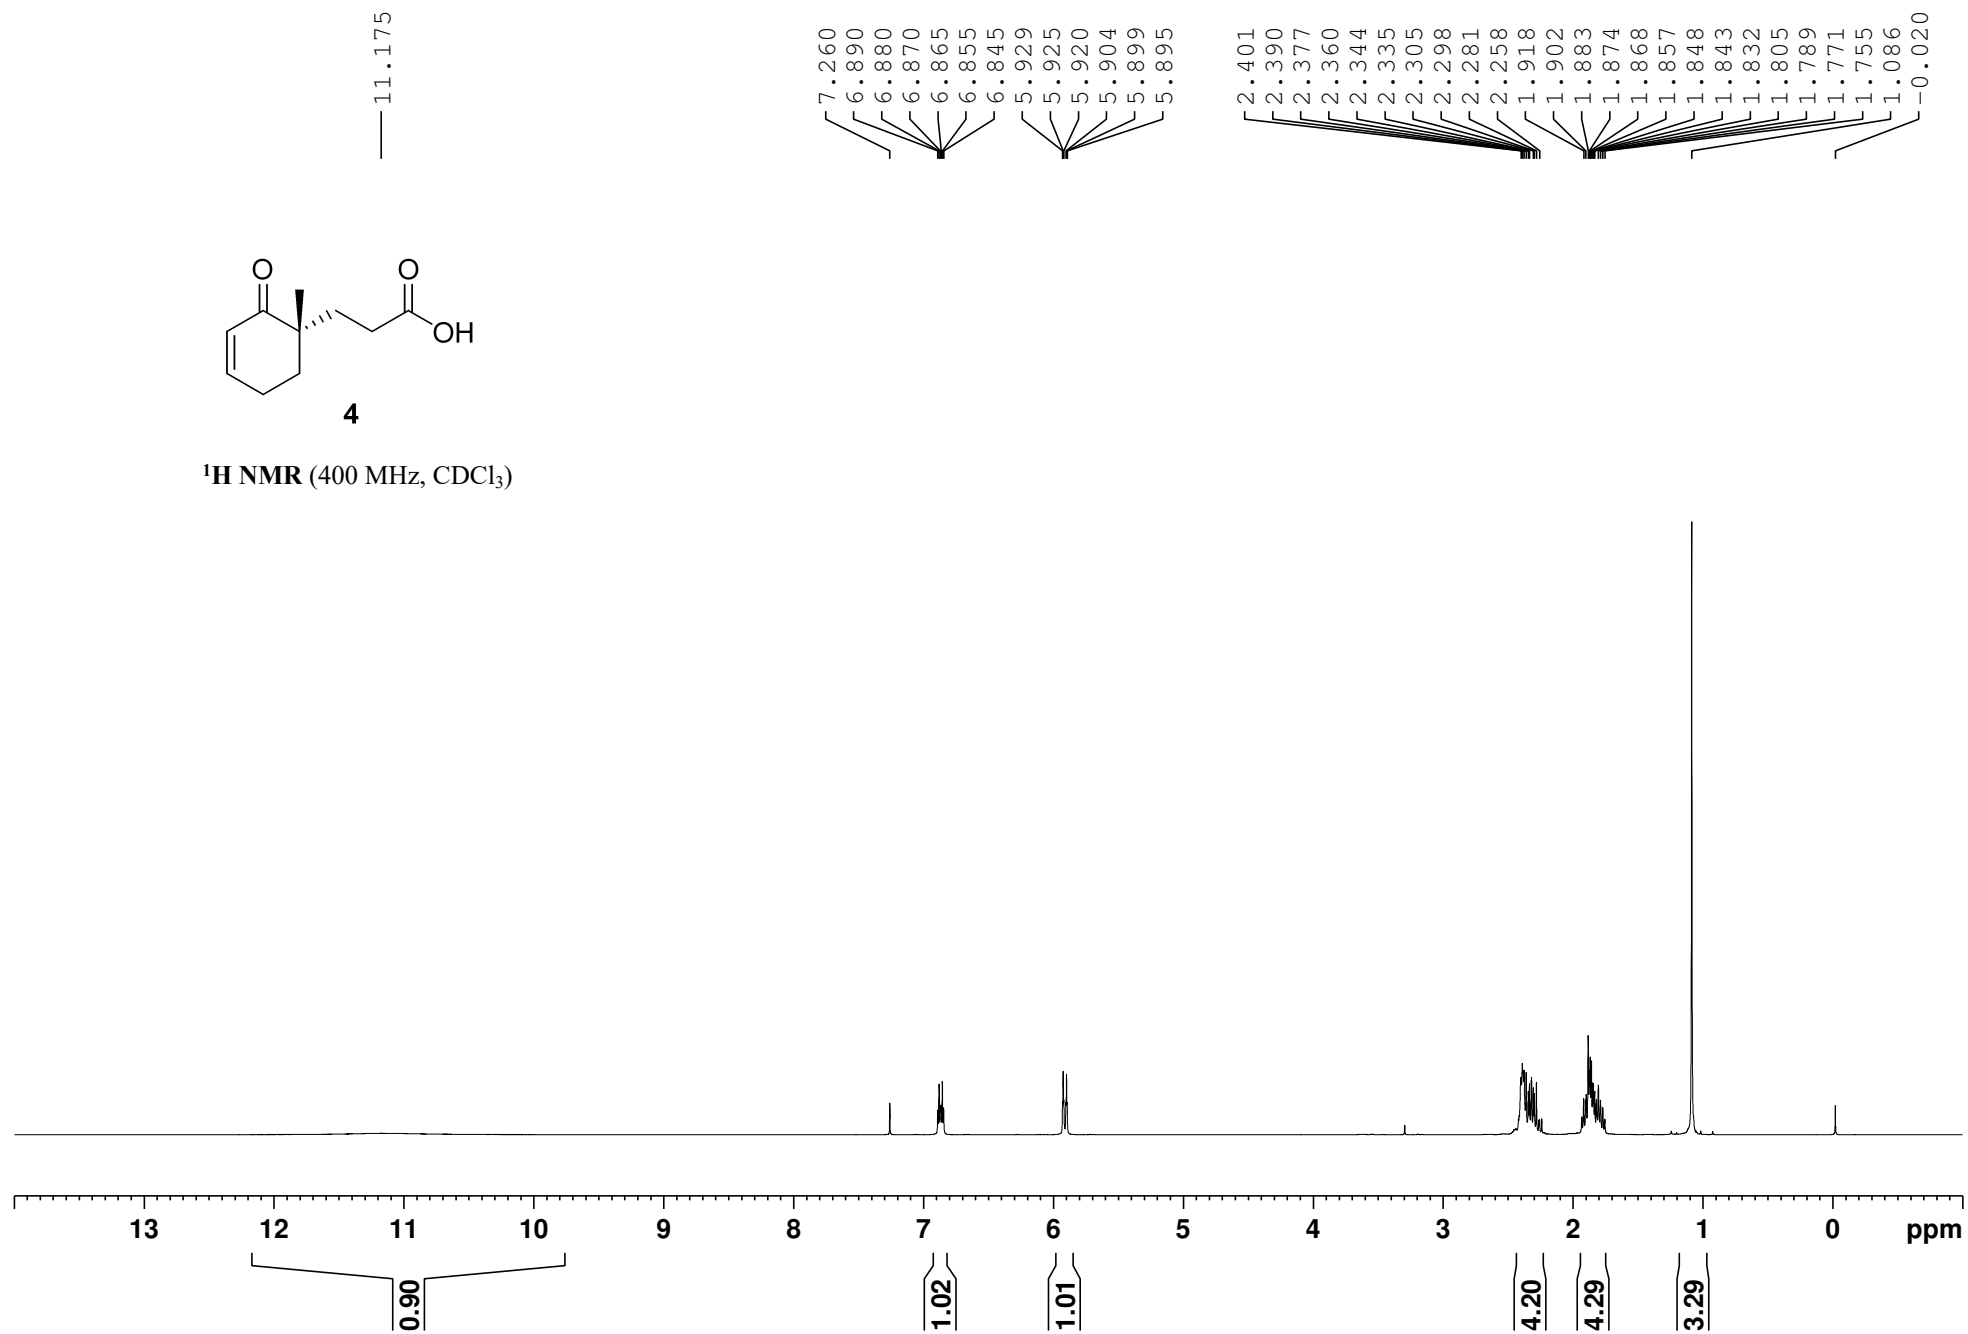



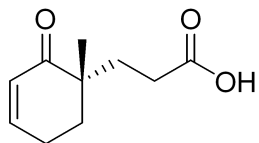

4

$^{13}\text{C}$  NMR (100 MHz,  $\text{CDCl}_3$ )

— 203.40

— 179.60

— 148.81

— 128.37

77.31  
77.00  
76.68

43.80  
33.58  
31.05  
29.05  
23.03  
21.61

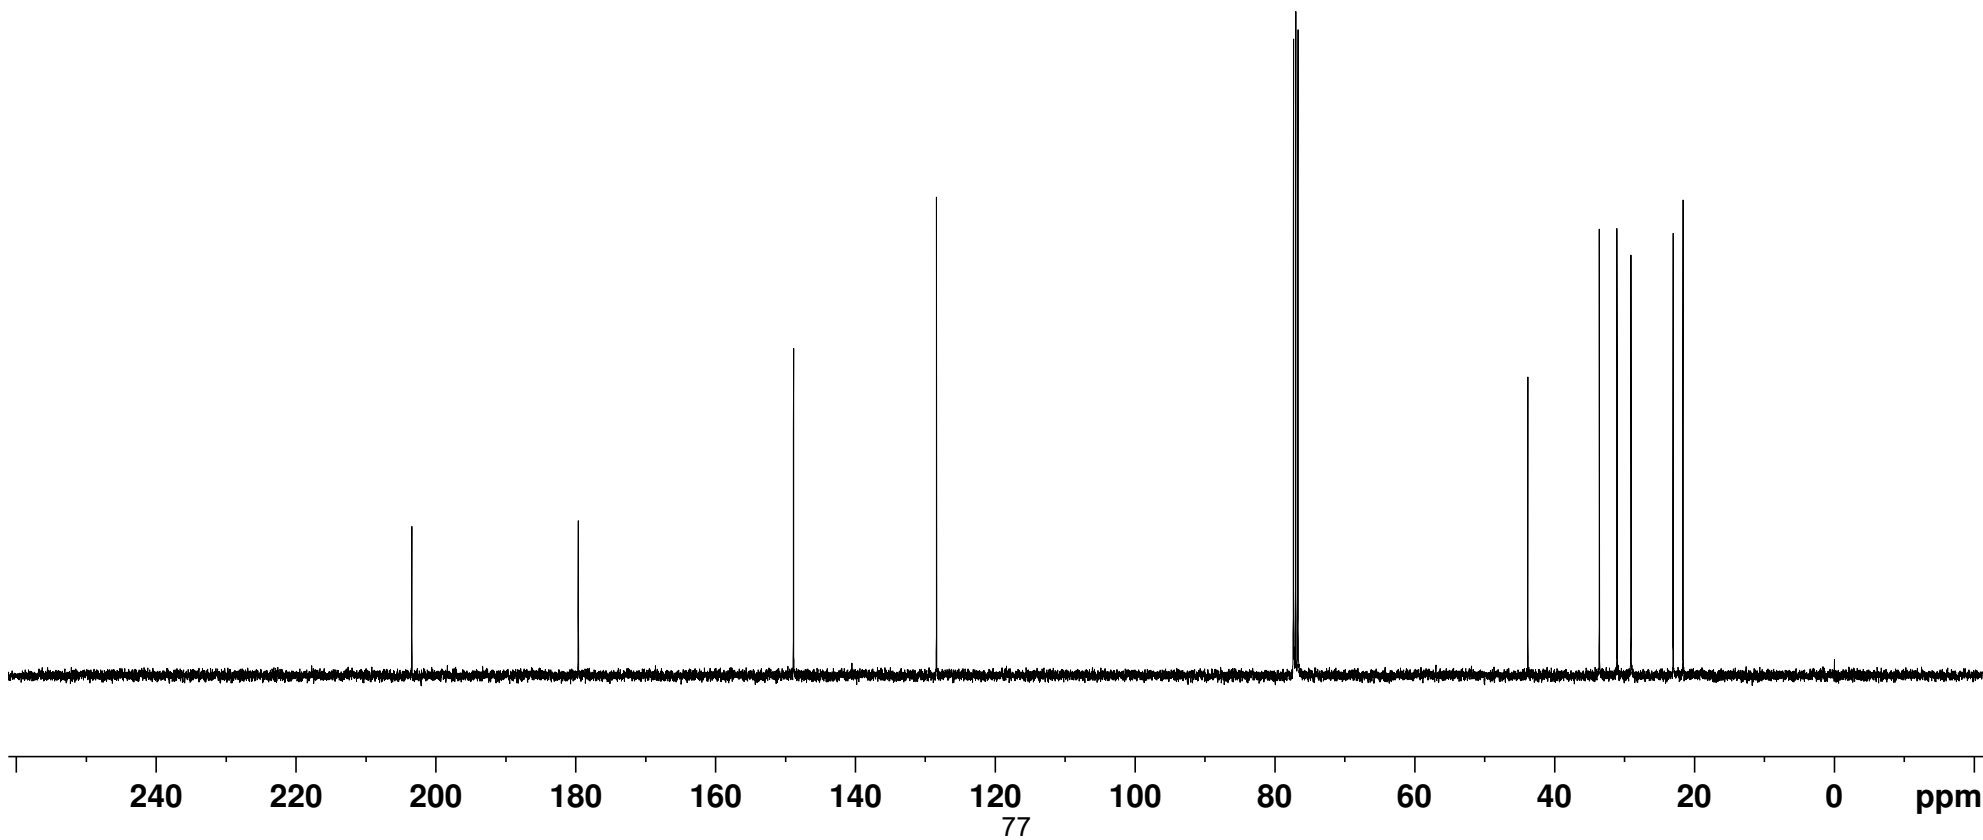

Sample Name: Compound-4-C5-9010xx      Wave Length: 210.0nm  
 Column: PDA Spectrum PDA 210.0 nm (PDA)

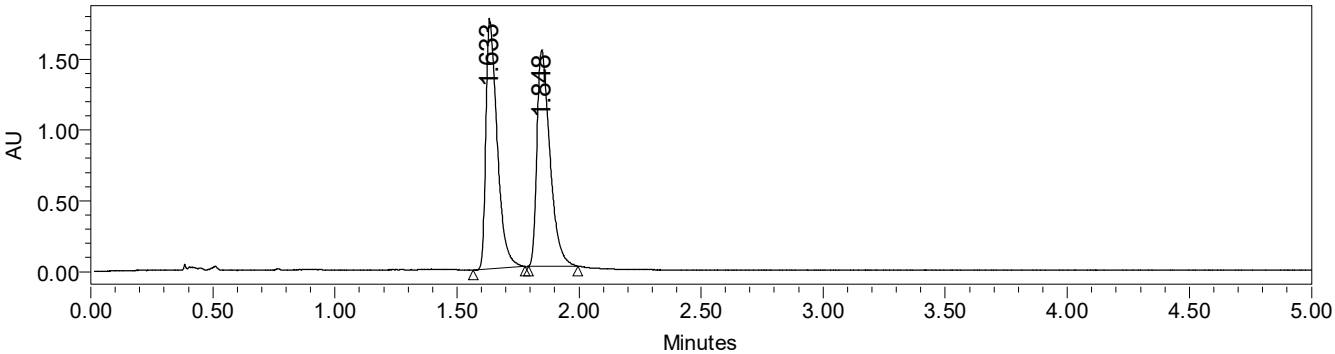

**peak information:**

|   | RetTime (min) | Area (μV*s) | Area (%) | Height (μV) |
|---|---------------|-------------|----------|-------------|
| 1 | 1.633         | 5653674     | 50.09    | 1767231     |
| 2 | 1.848         | 5633489     | 49.91    | 1528376     |

Sample Name: Compound-4-C5-9010      Wave Length: 210.0nm  
 Column: PDA Spectrum PDA 210.0 nm (PDA)

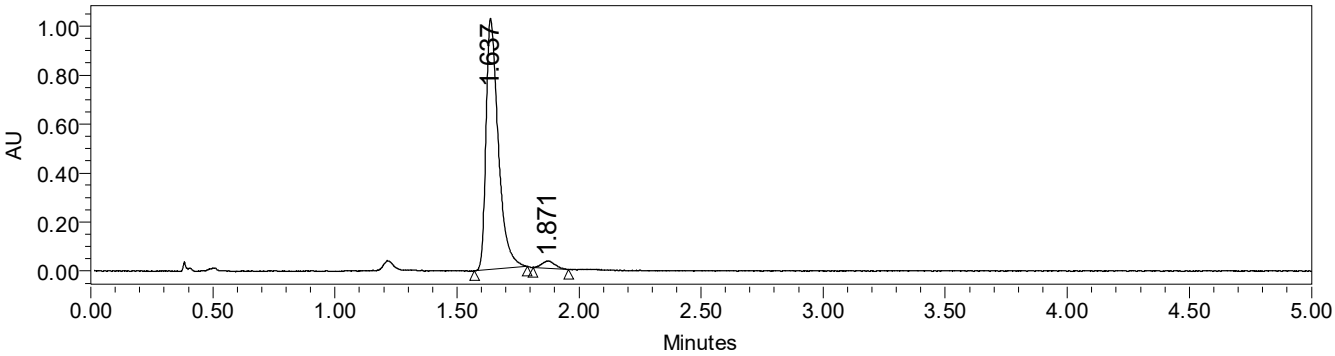

**peak information:**

|   | RetTime (min) | Area (μV*s) | Area (%) | Height (μV) |
|---|---------------|-------------|----------|-------------|
| 1 | 1.637         | 3569507     | 97.05    | 1025589     |
| 2 | 1.871         | 108487      | 2.95     | 29459       |

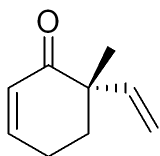

**3**

<sup>1</sup>H NMR (400 MHz, CDCl<sub>3</sub>)

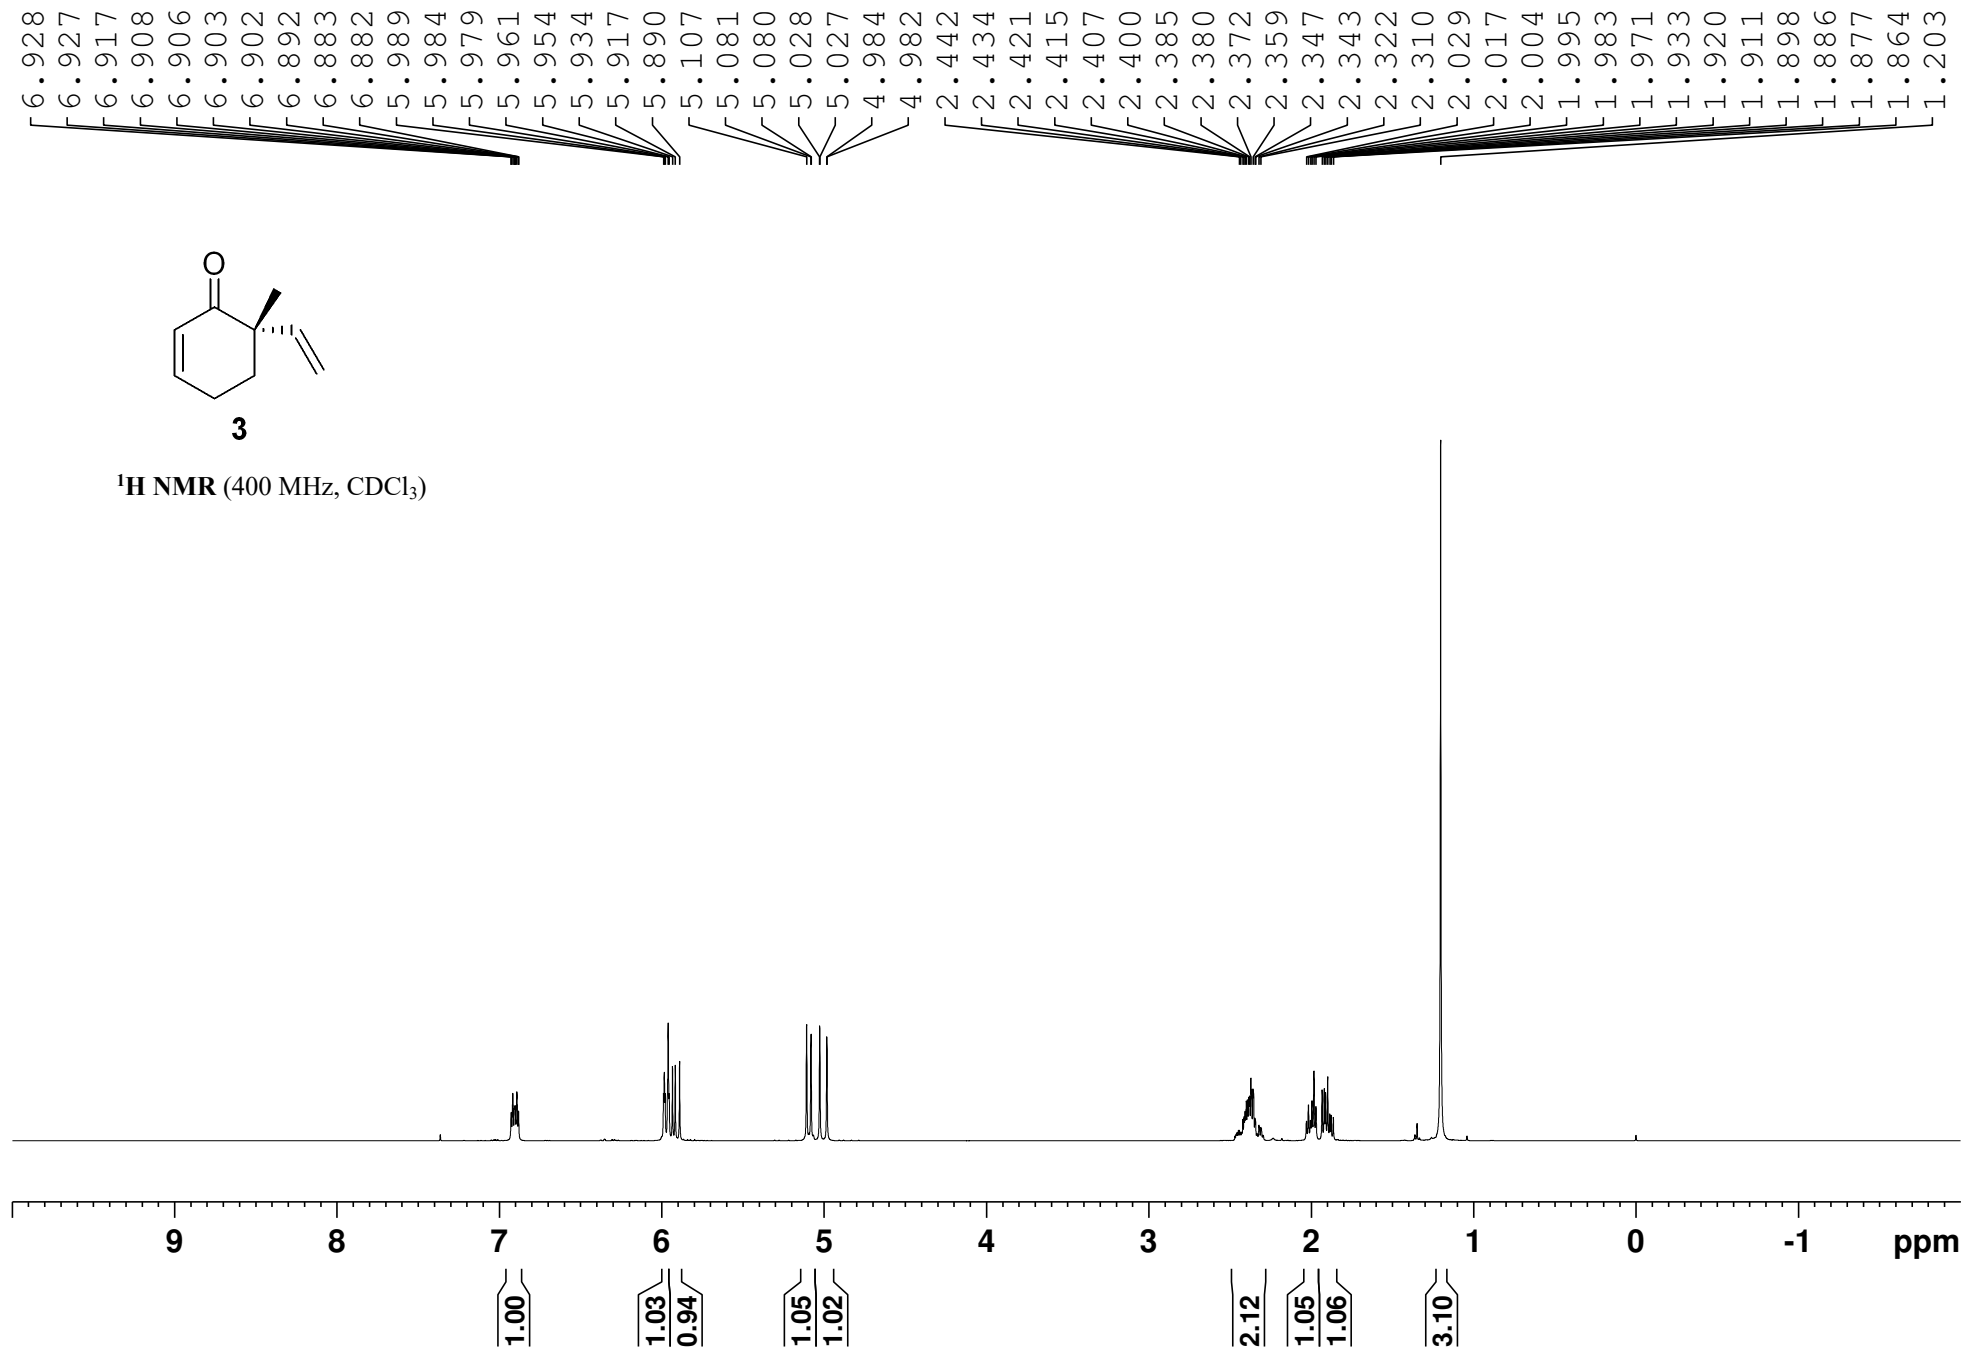

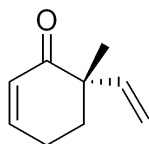

3

$^{13}\text{C}$  NMR (100 MHz,  $\text{CDCl}_3$ )

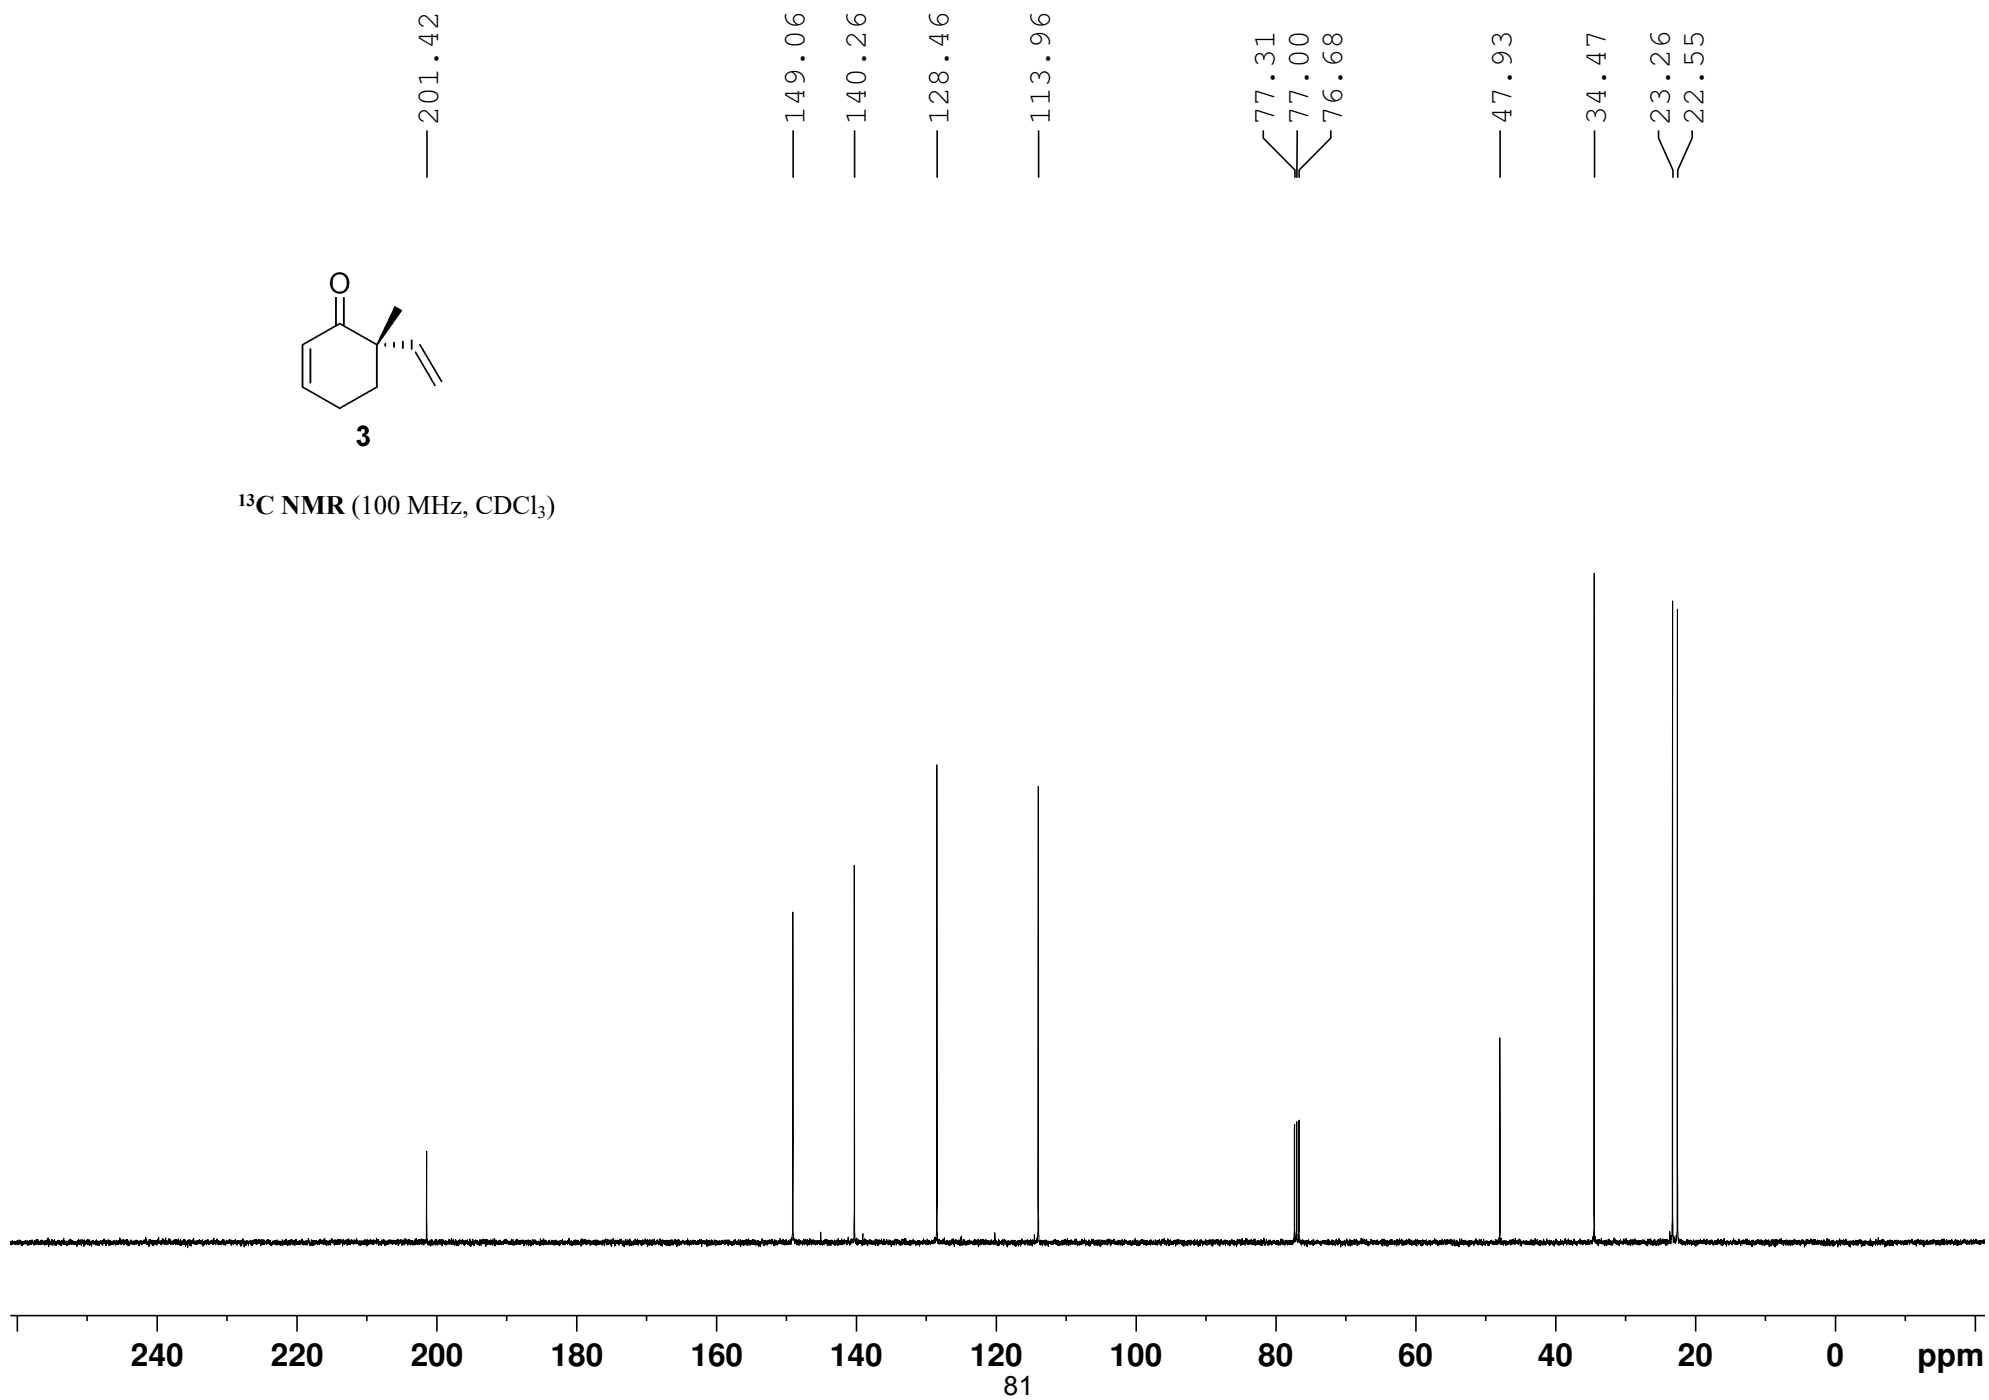

Sample Name: Compound -3-C7-9901-xx      Wave Length: 238.0nm  
 Column: PDA Spectrum PDA 238.0 nm (PDA)

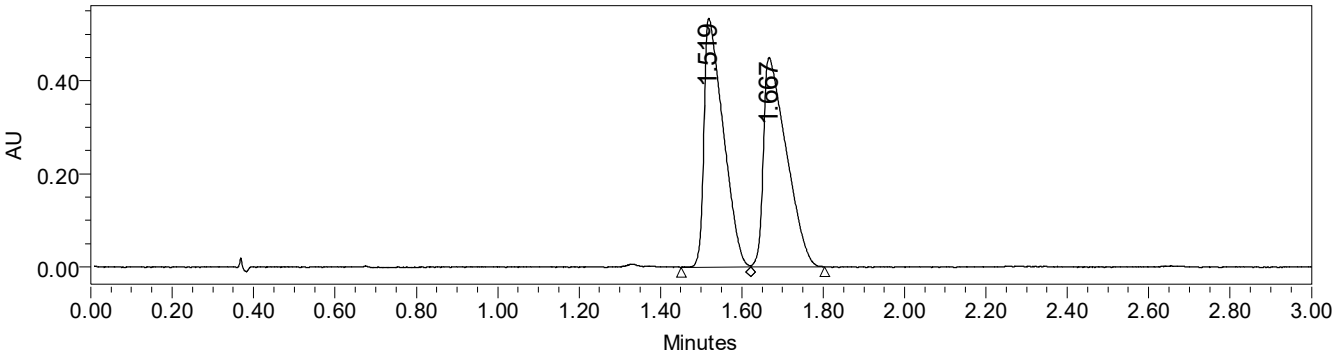

**peak information:**

|   | RetTime (min) | Area (μV*s) | Area (%) | Height (μV) |
|---|---------------|-------------|----------|-------------|
| 1 | 1.519         | 1750624     | 49.90    | 534160      |
| 2 | 1.667         | 1757818     | 50.10    | 450094      |

Sample Name: Compound-3-C7-9901      Wave Length: 238.0nm  
 Column: PDA Spectrum PDA 238.0 nm (PDA)

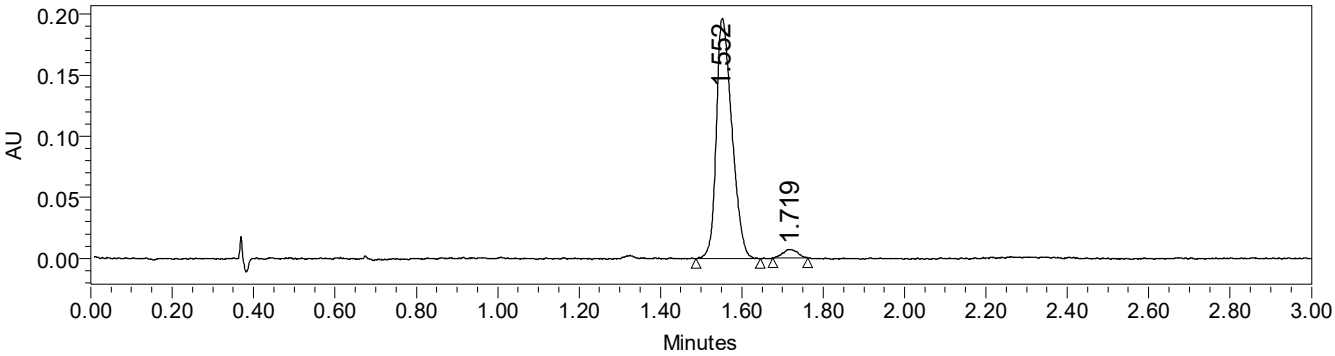

**peak information:**

|   | RetTime (min) | Area (µV*s) | Area (%) | Height (µV) |
|---|---------------|-------------|----------|-------------|
| 1 | 1.552         | 521197      | 96.76    | 196364      |
| 2 | 1.719         | 17443       | 3.24     | 6956        |

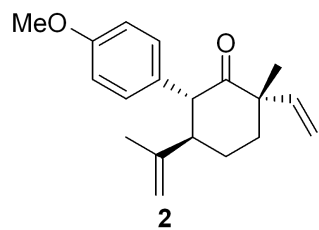

<sup>1</sup>H NMR (400 MHz, CDCl<sub>3</sub>)

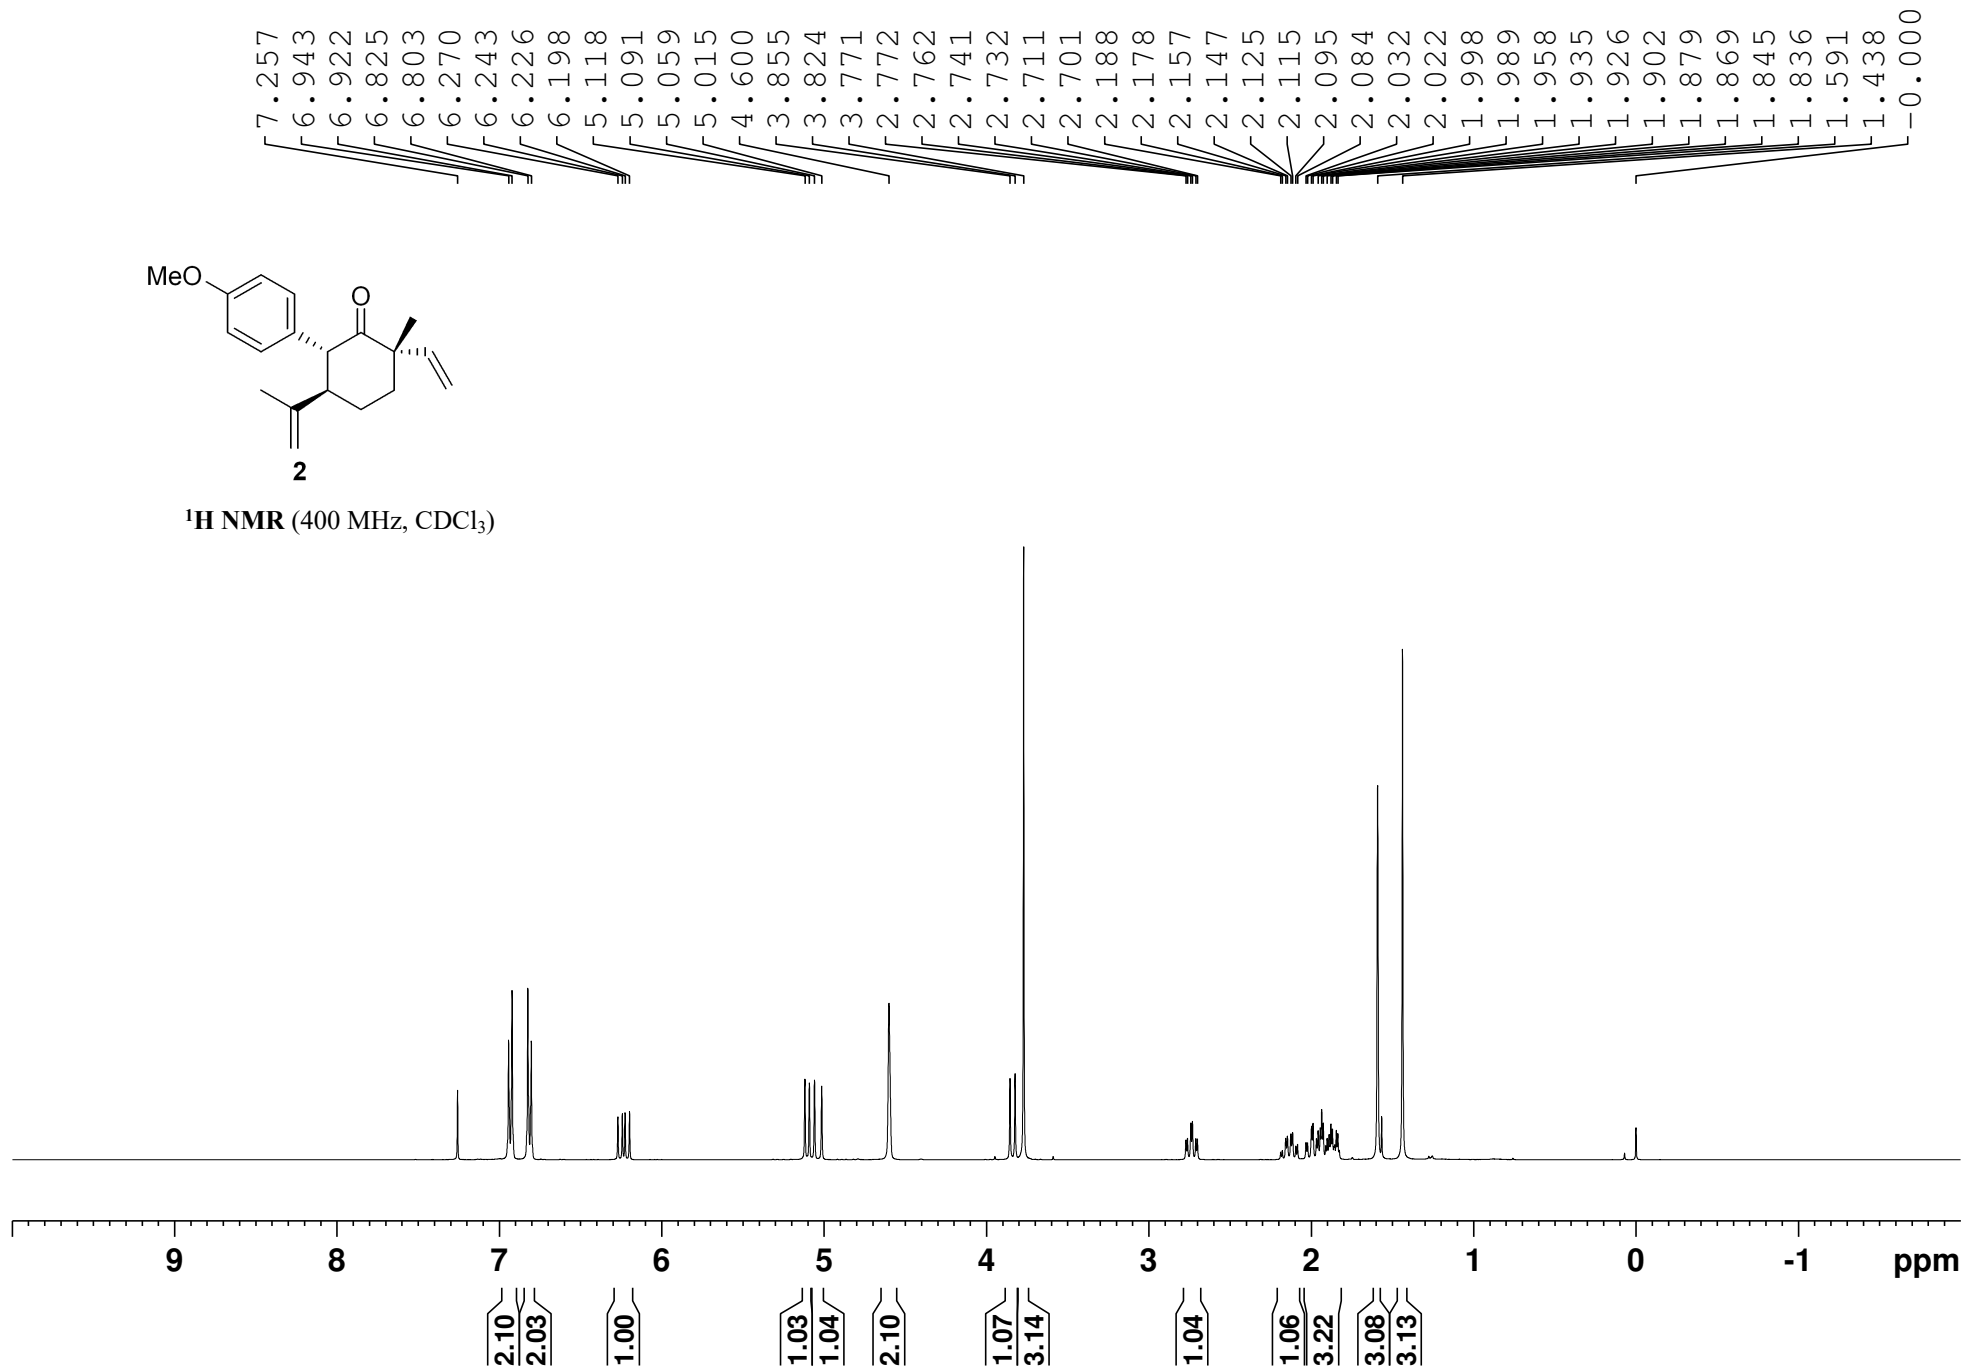



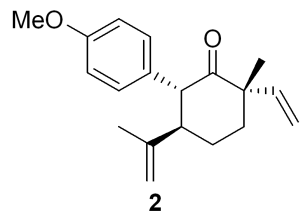

$^{13}\text{C}$  NMR (100 MHz,  $\text{CDCl}_3$ )

— 212.08

— 158.20

— 145.77

— 142.94

— 130.33

— 129.04

— 113.42

— 112.75

— 112.25

— 77.36

— 77.04

— 76.73

— 55.98

— 55.11

— 53.13

— 50.46

— 36.65

— 27.34

— 22.99

— 18.81

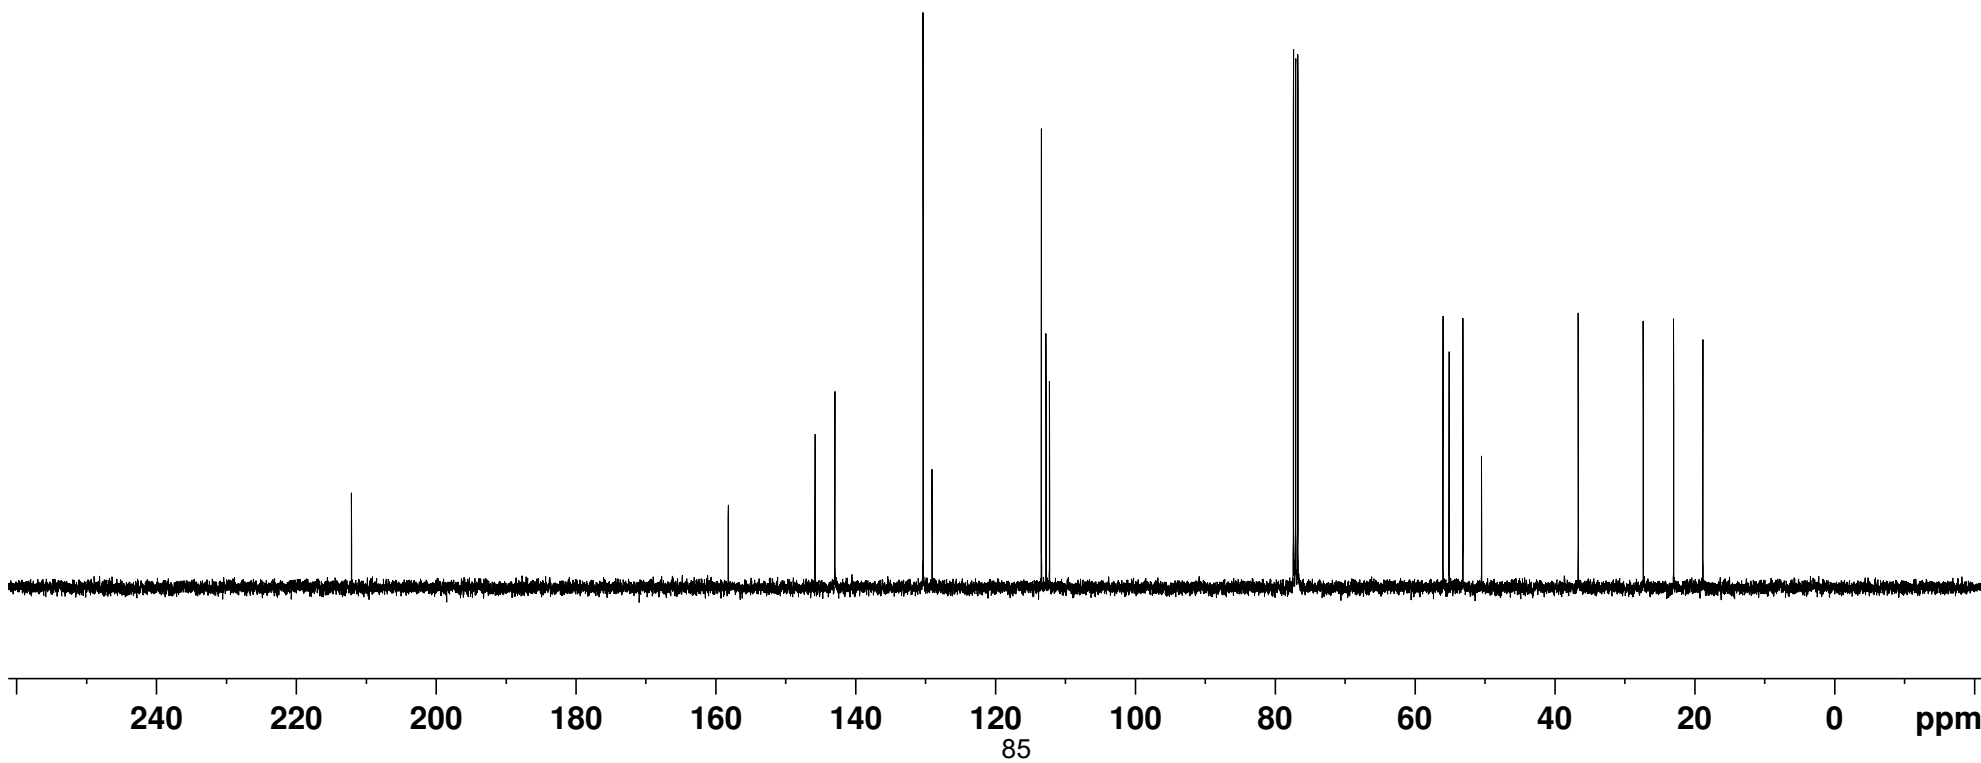

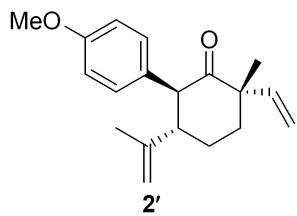

<sup>1</sup>H NMR (600 MHz, CDCl<sub>3</sub>)

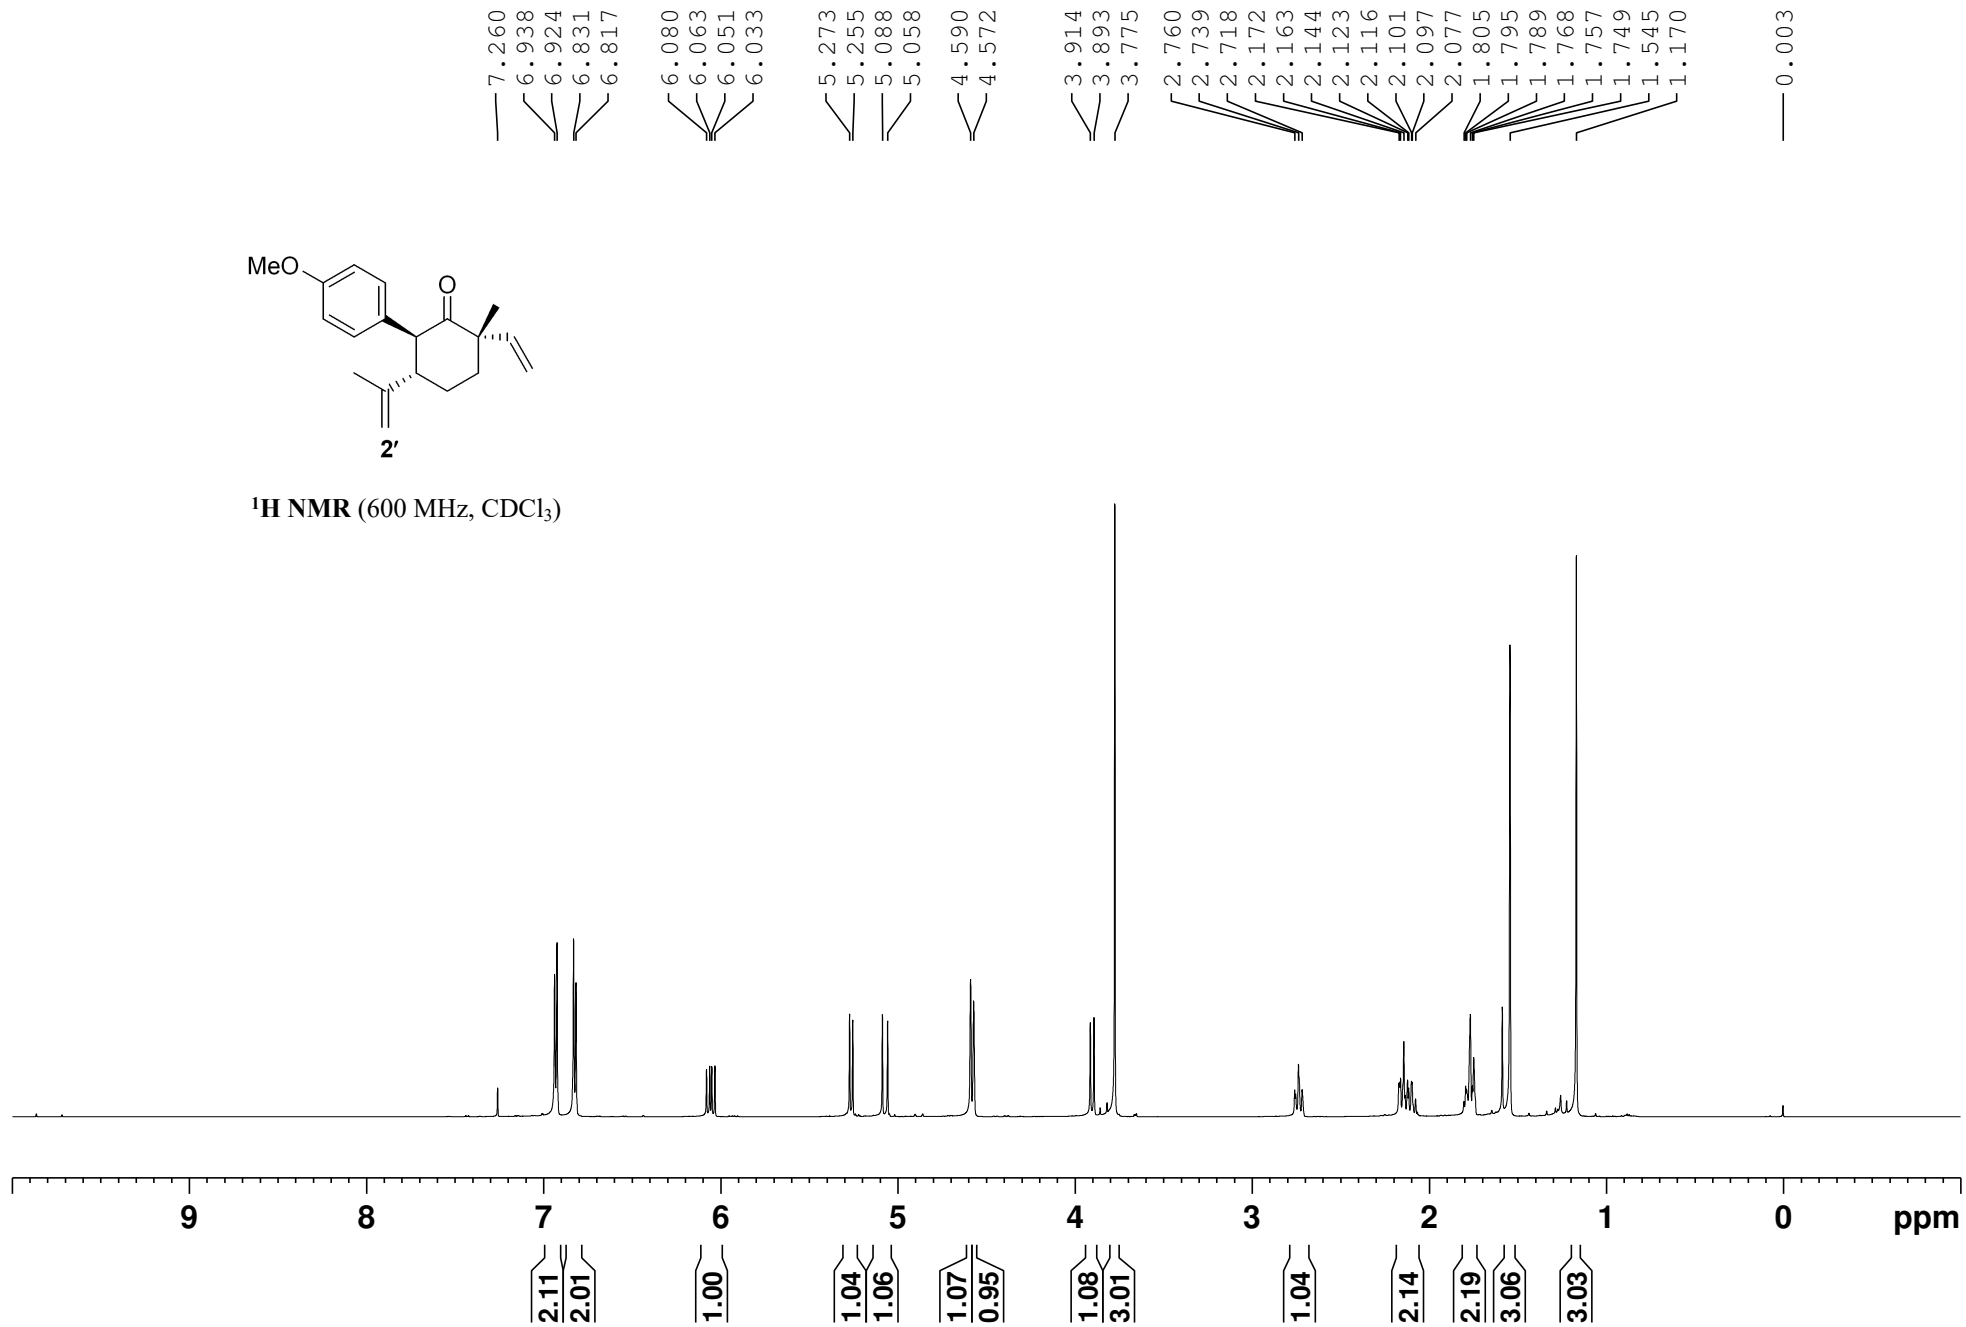

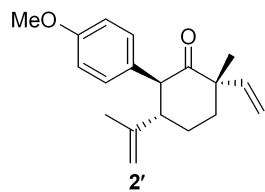

<sup>13</sup>C NMR (150 MHz, CDCl<sub>3</sub>)

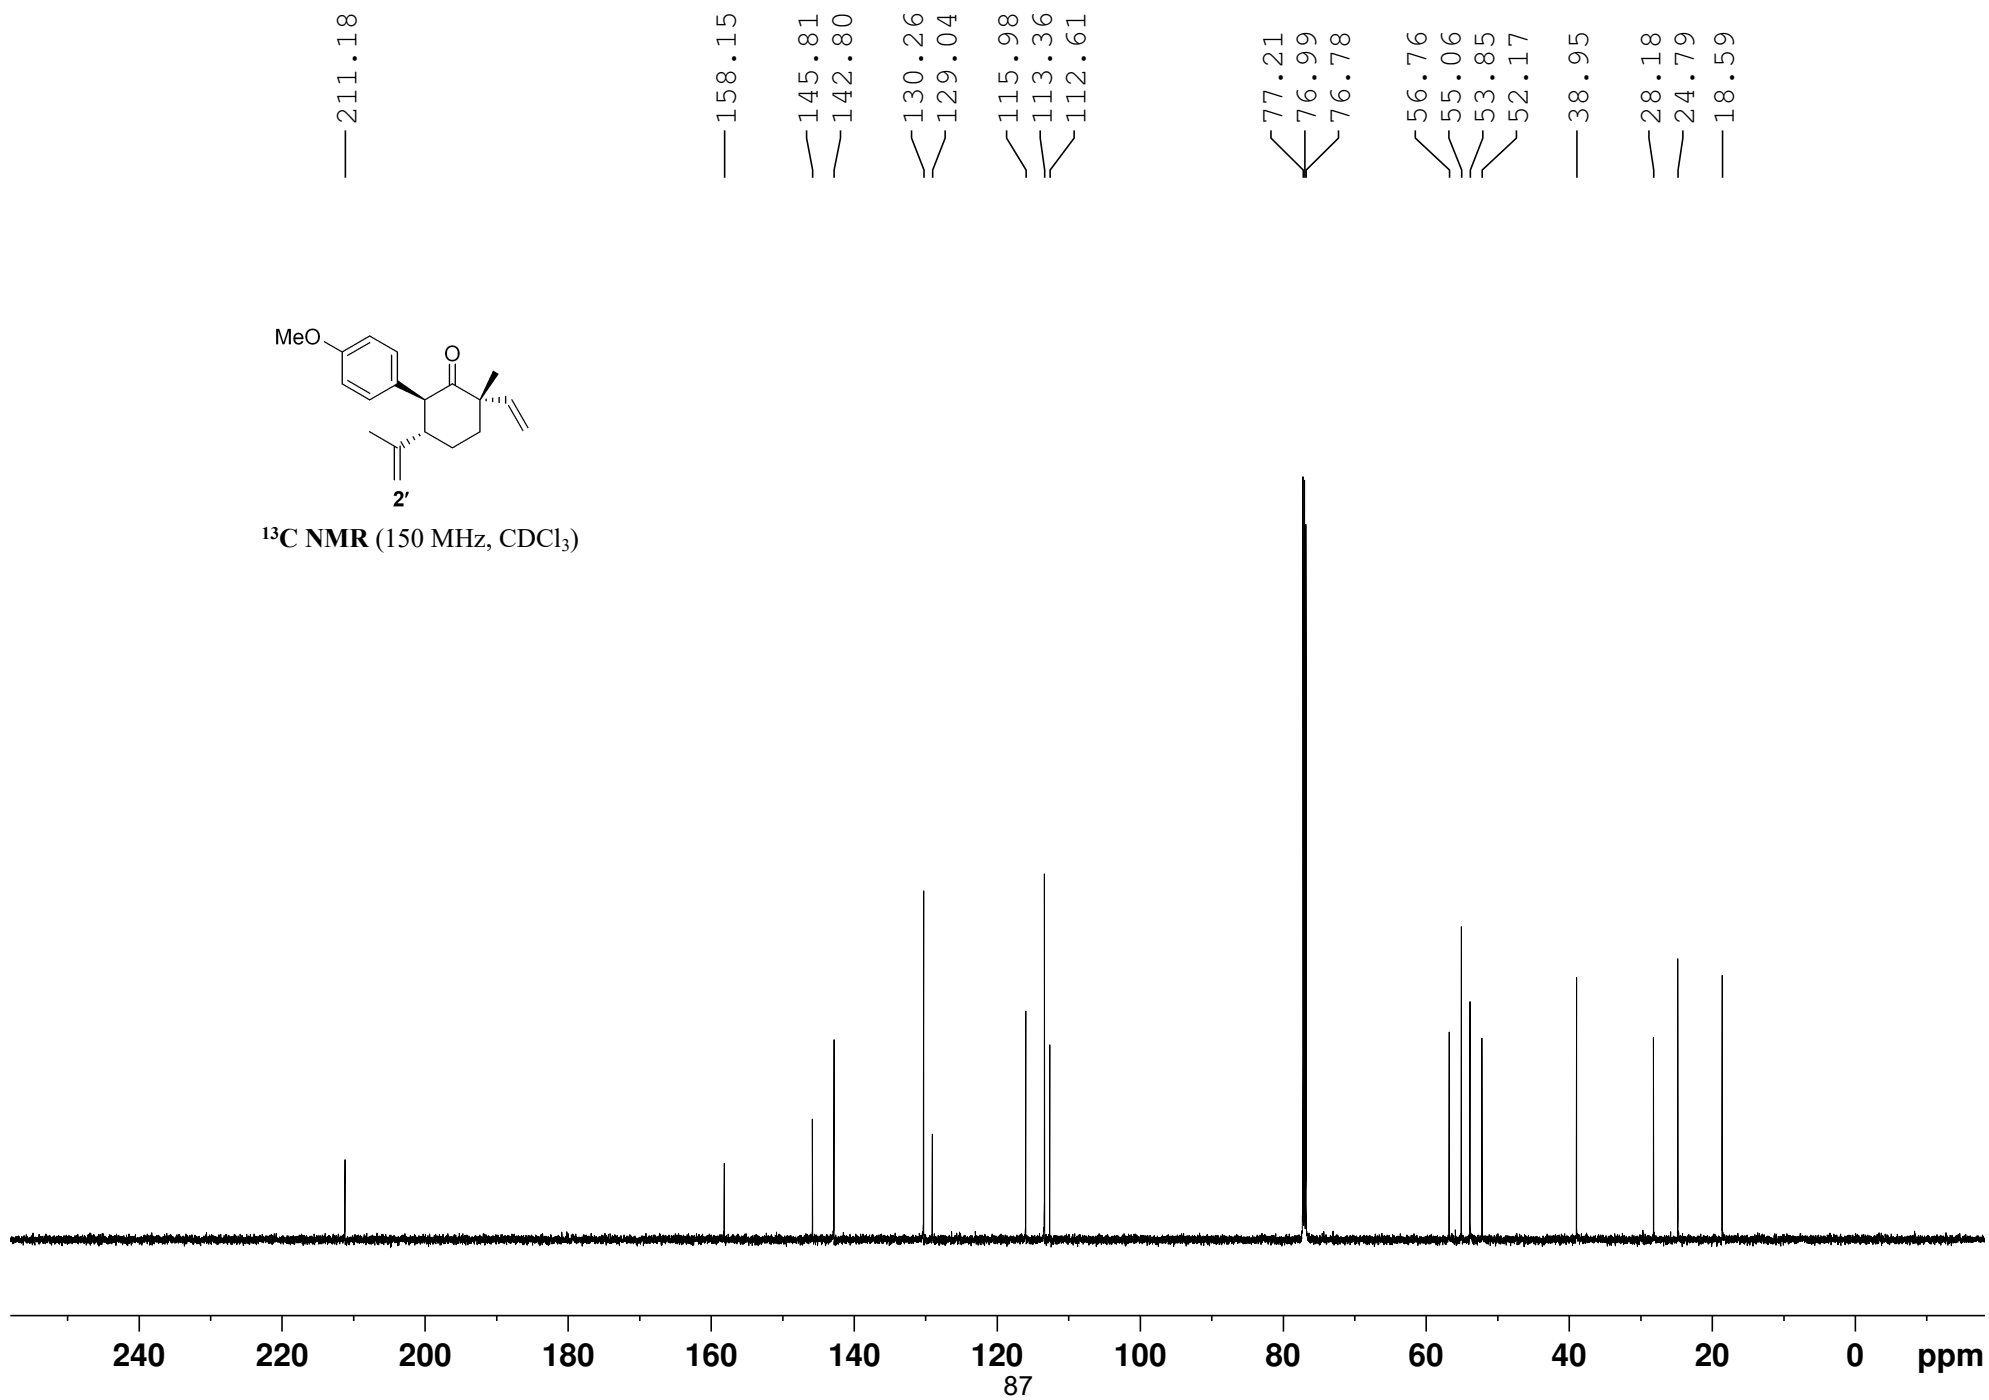

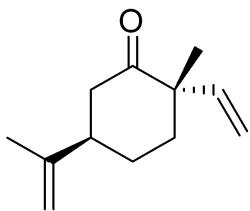

**Int 2**

<sup>1</sup>H NMR (600 MHz, CDCl<sub>3</sub>)

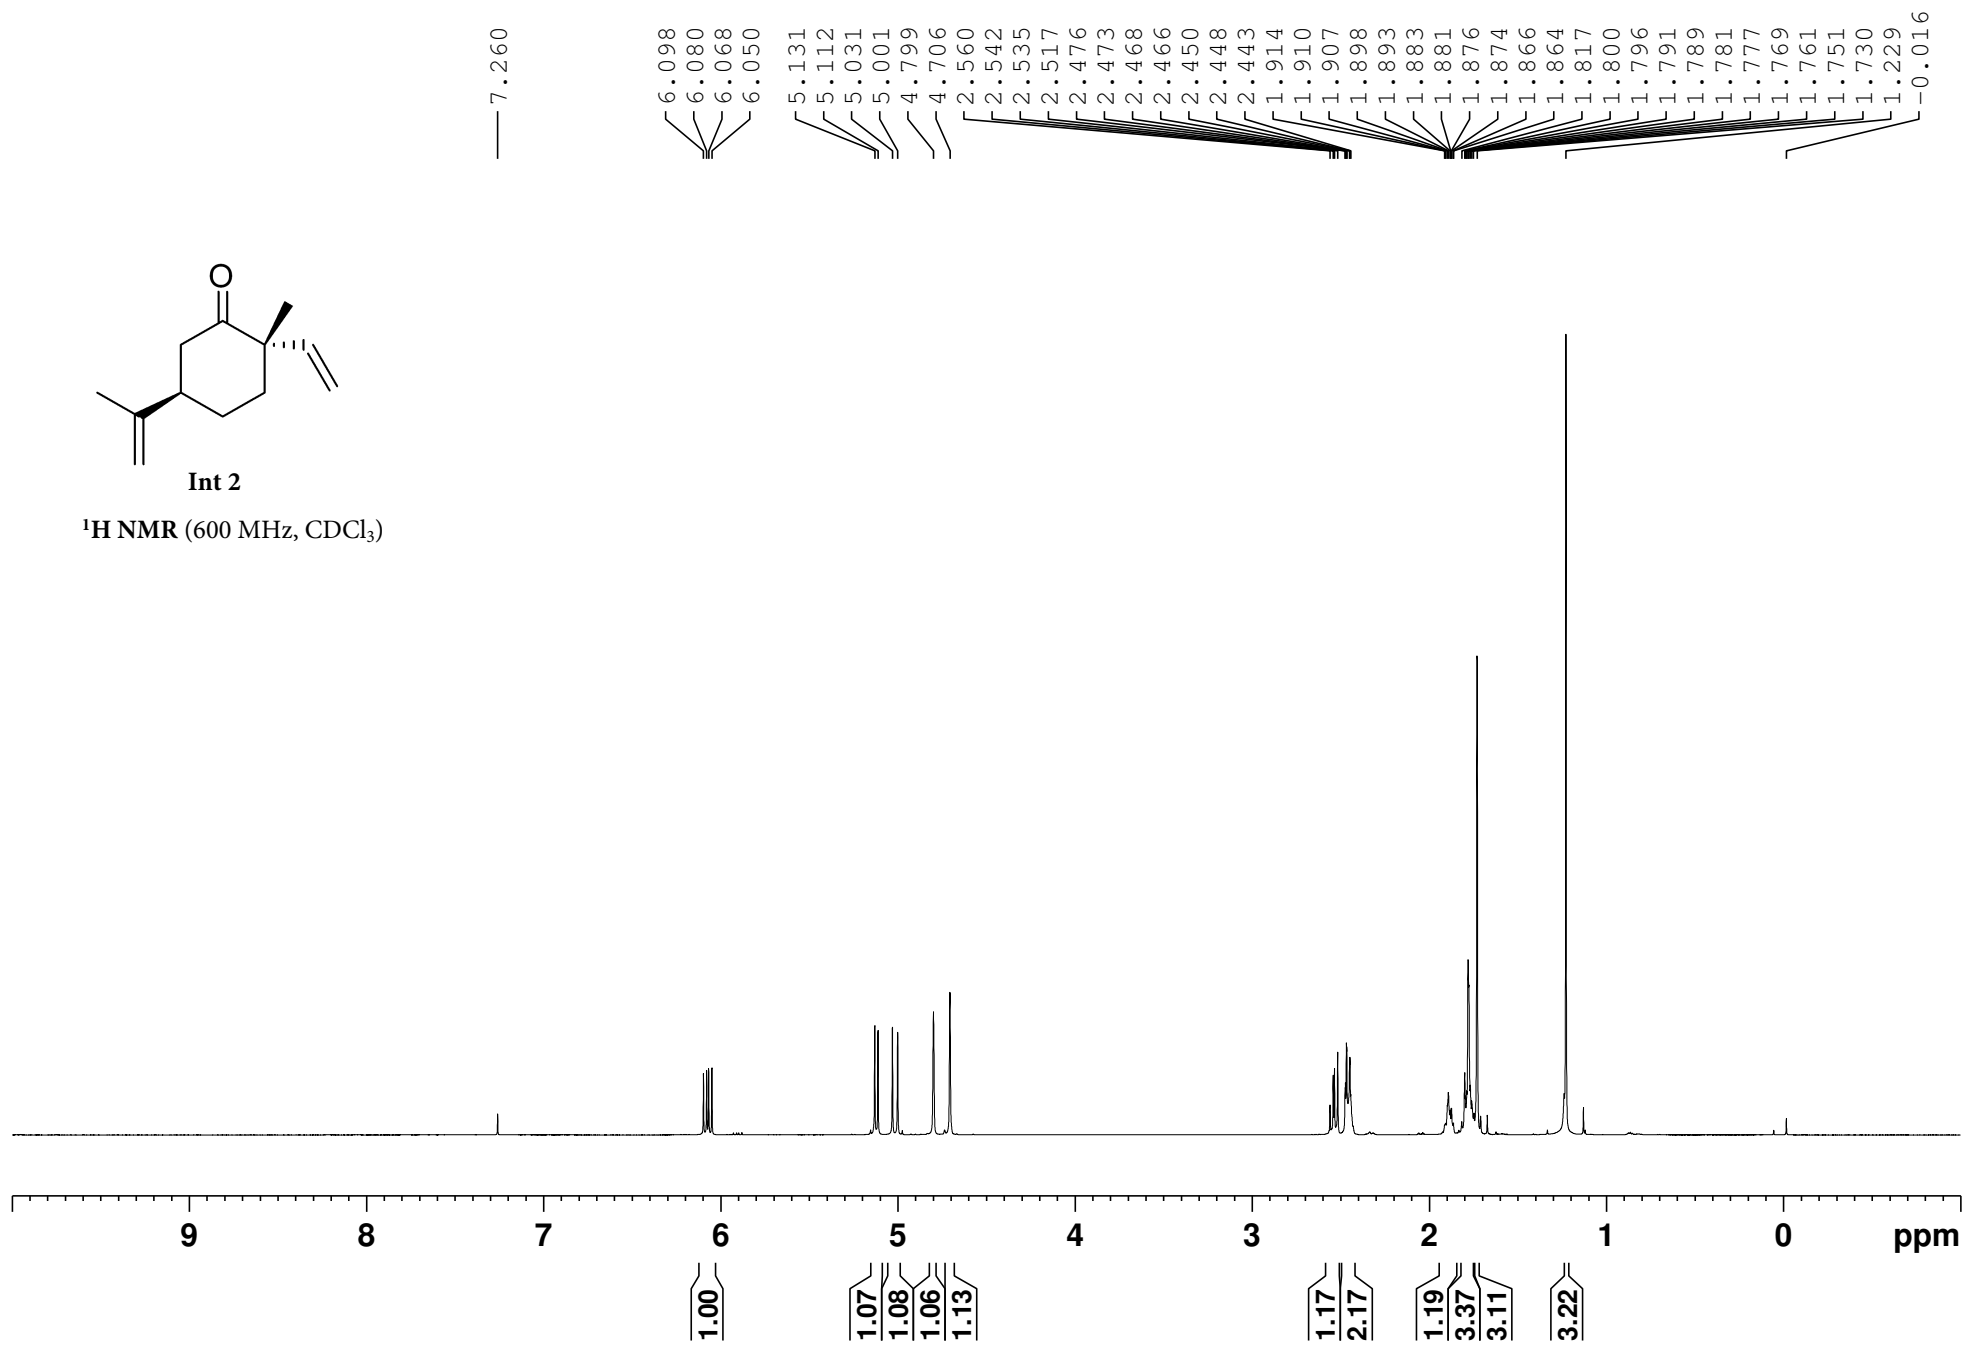

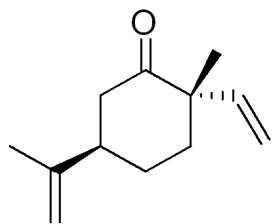

Int 2

$^{13}\text{C}$  NMR (150 MHz,  $\text{CDCl}_3$ )

— 213.37

— 147.10  
— 142.65

— 113.42  
— 110.62

— 77.21  
— 77.00  
— 76.78

— 50.71  
— 44.91  
— 43.03  
— 36.04

— 25.49  
— 22.85  
— 21.00

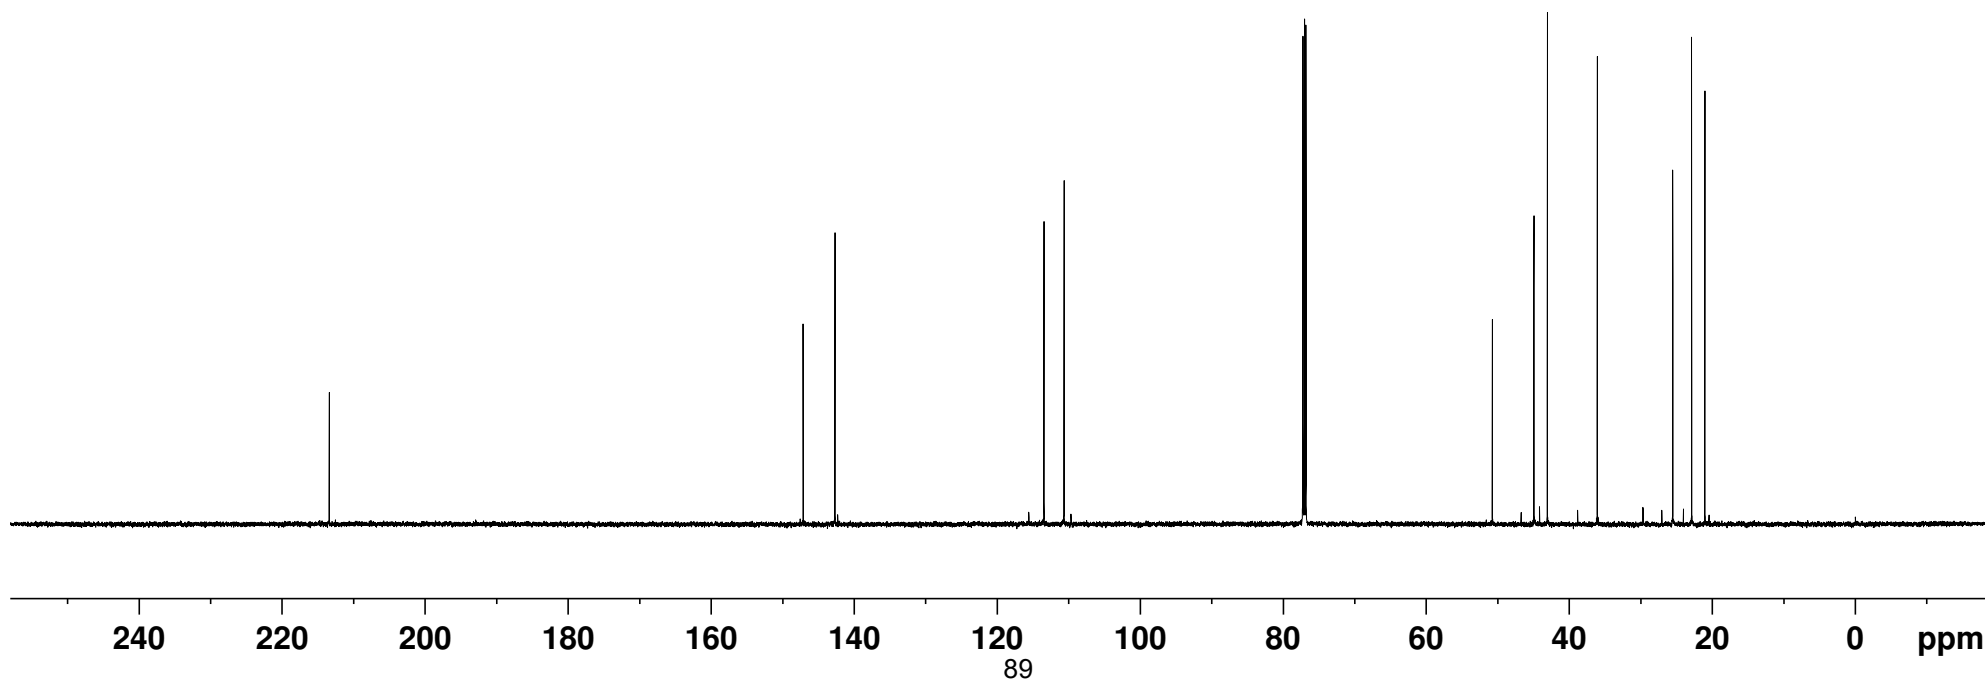

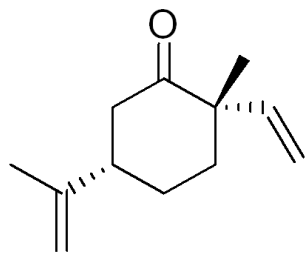

Int 2'

<sup>1</sup>H NMR (600 MHz, CDCl<sub>3</sub>)

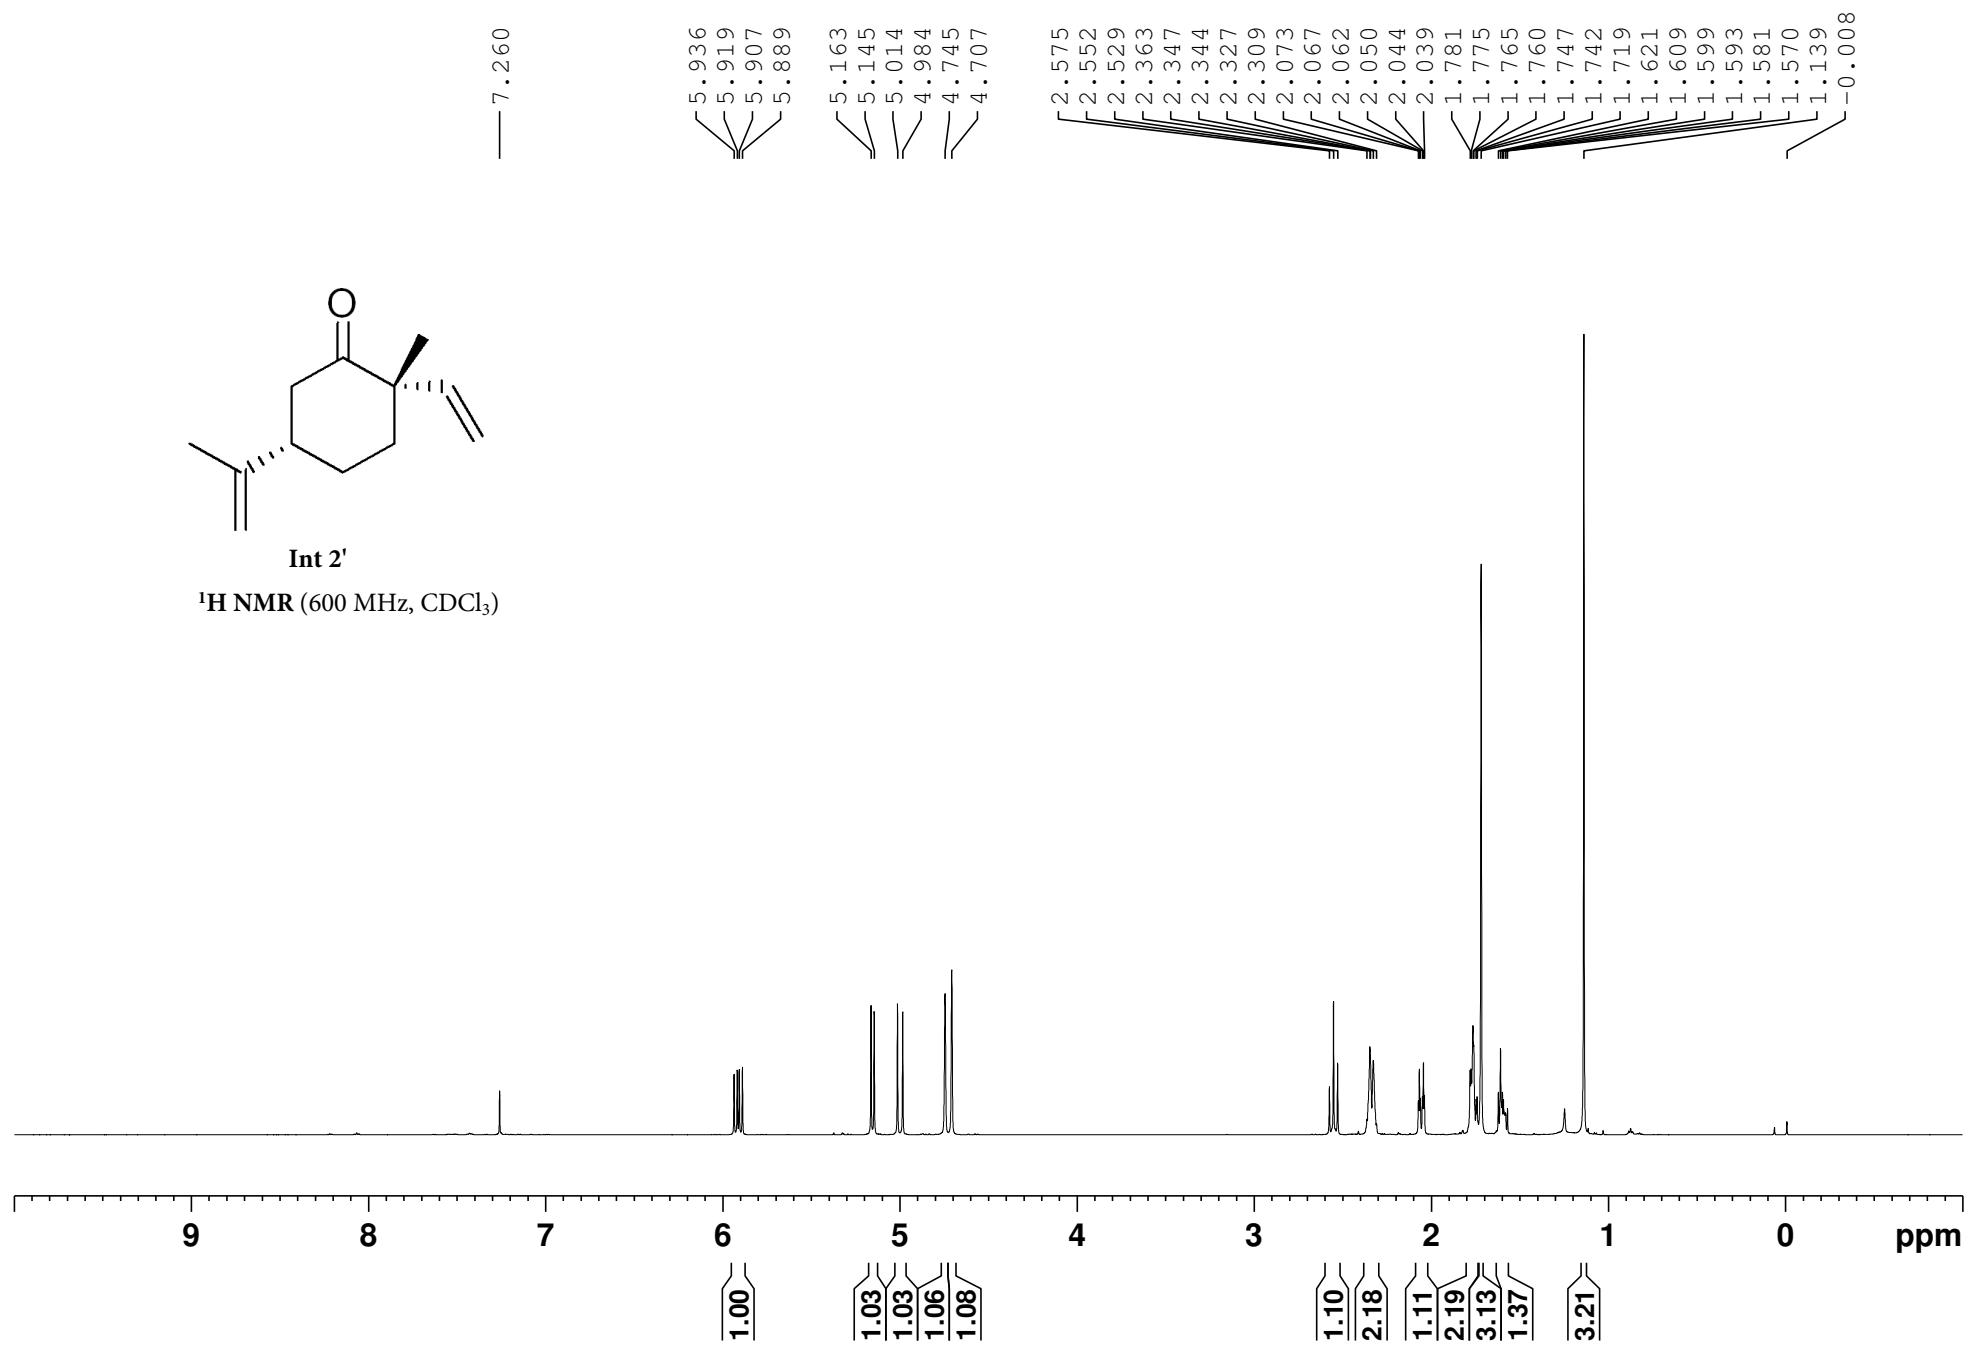

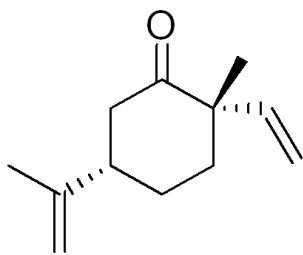

Int 2'

<sup>13</sup>C NMR (150 MHz, CDCl<sub>3</sub>)

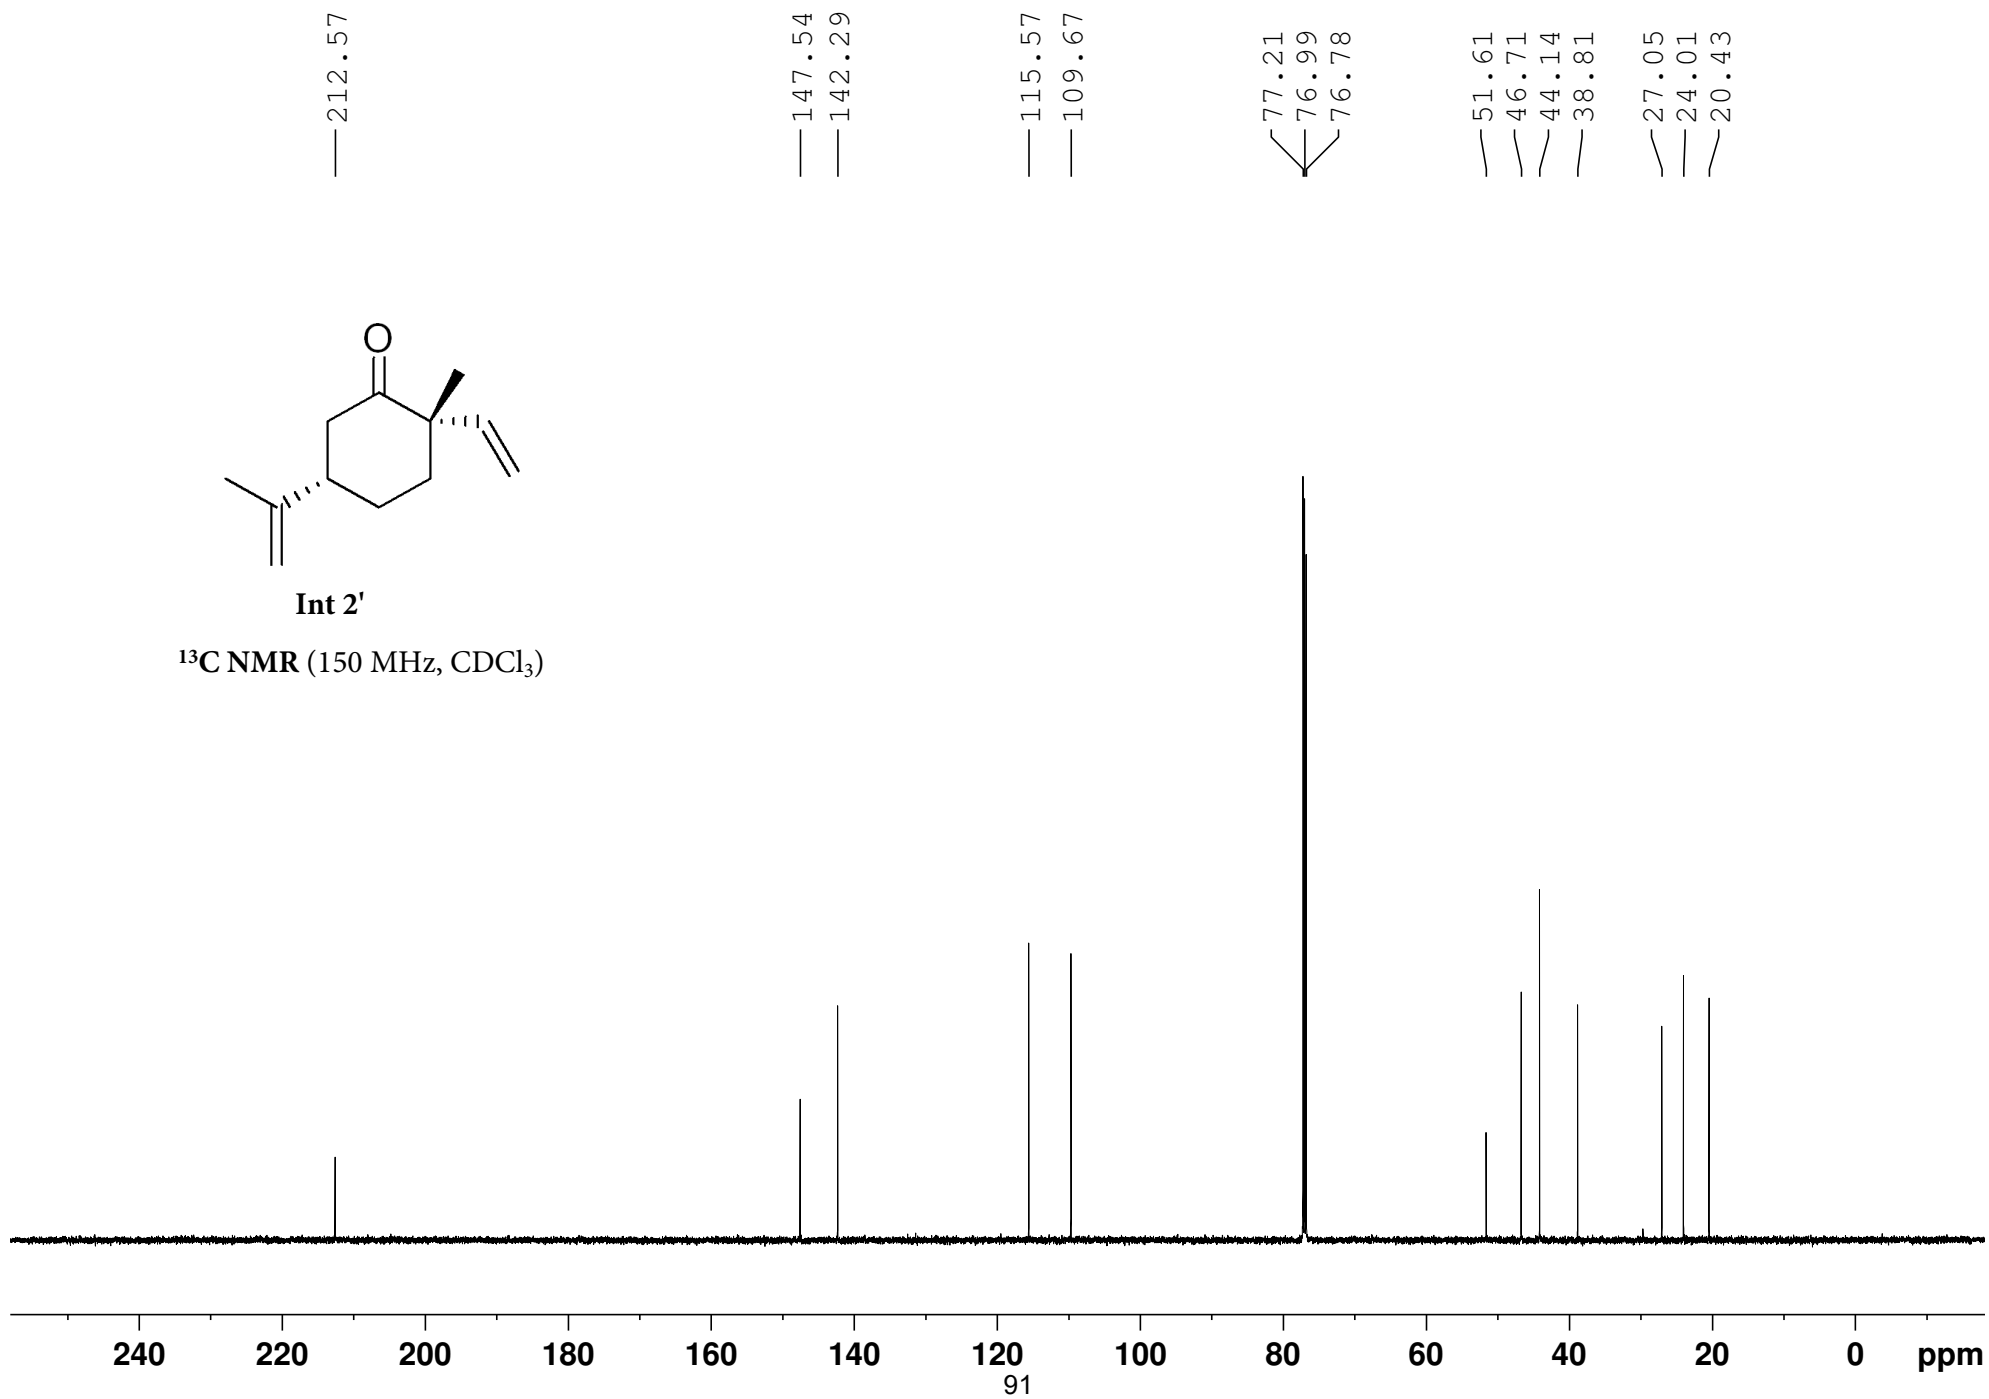

7.260  
7.129  
7.108  
6.846  
6.825  
5.960  
5.933  
5.916  
5.889  
5.134  
5.131  
5.090  
5.087  
5.080  
5.078  
5.053  
5.051  
4.533  
4.529  
3.777  
3.490  
3.464  
2.709  
2.680  
2.654  
2.400  
2.391  
2.371  
2.362  
2.337  
1.793  
1.746  
1.726  
1.708  
1.690  
1.665  
1.659  
1.651  
1.641  
1.626  
1.617  
1.609  
1.596  
1.579  
1.570  
1.562  
1.539  
1.178

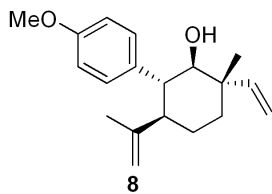

<sup>1</sup>H NMR (400 MHz, CDCl<sub>3</sub>)

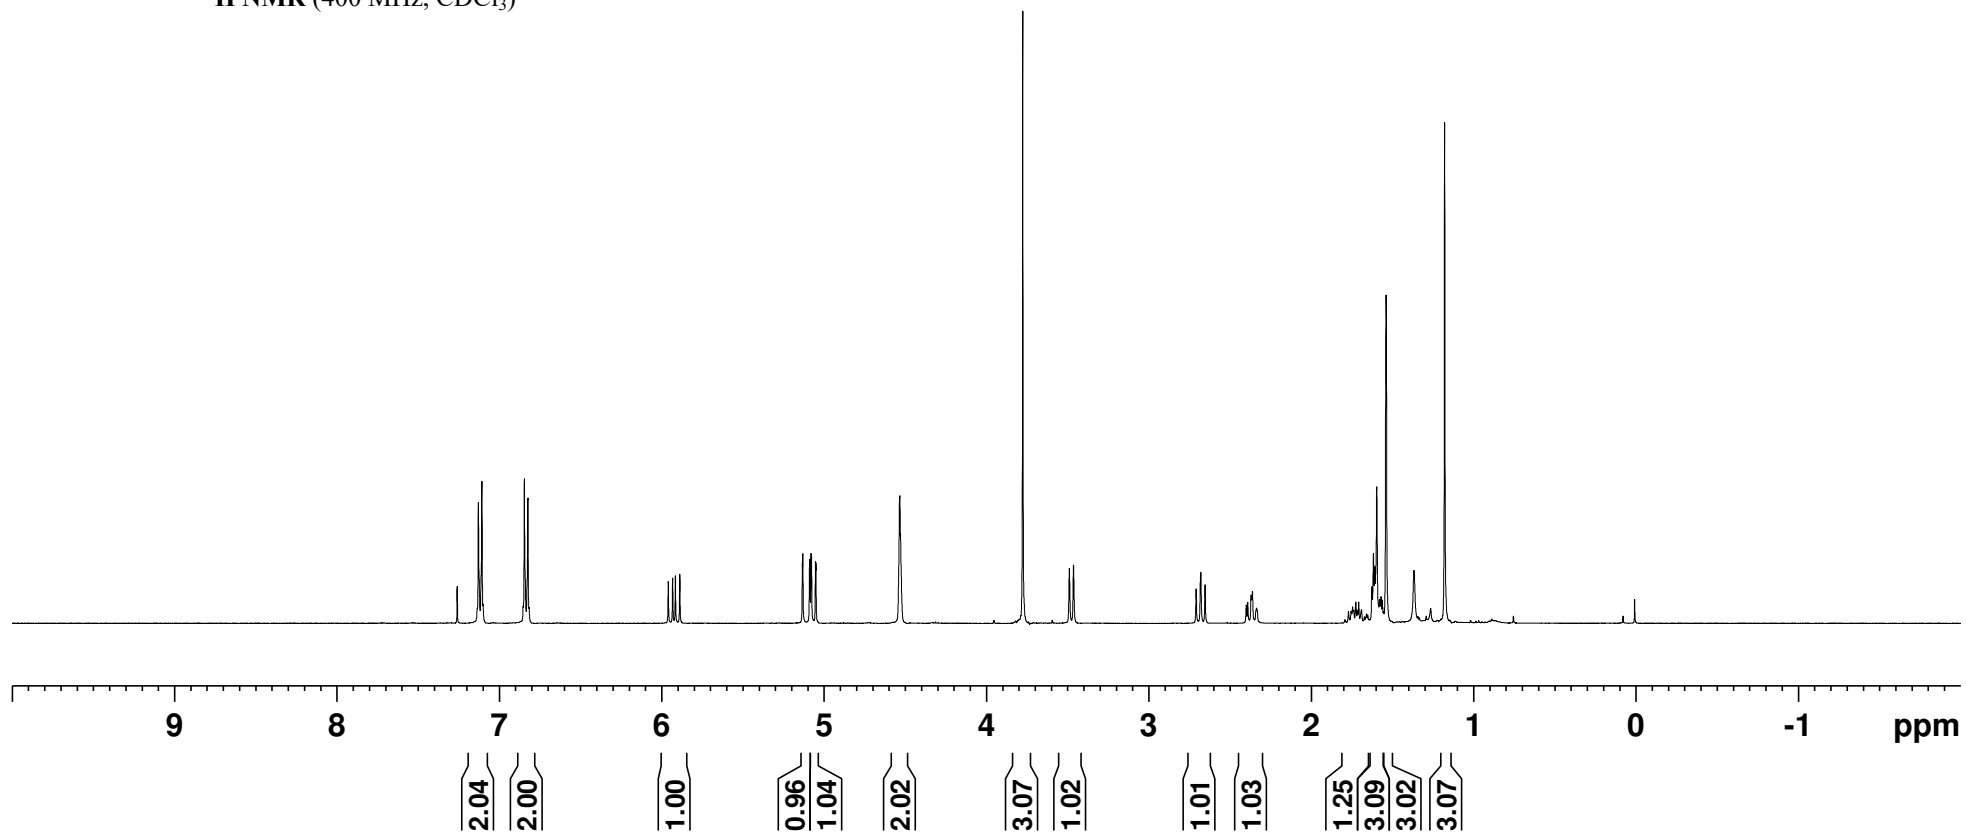



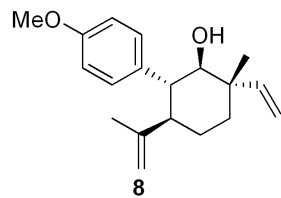

$^{13}\text{C}$  NMR (100 MHz,  $\text{CDCl}_3$ )

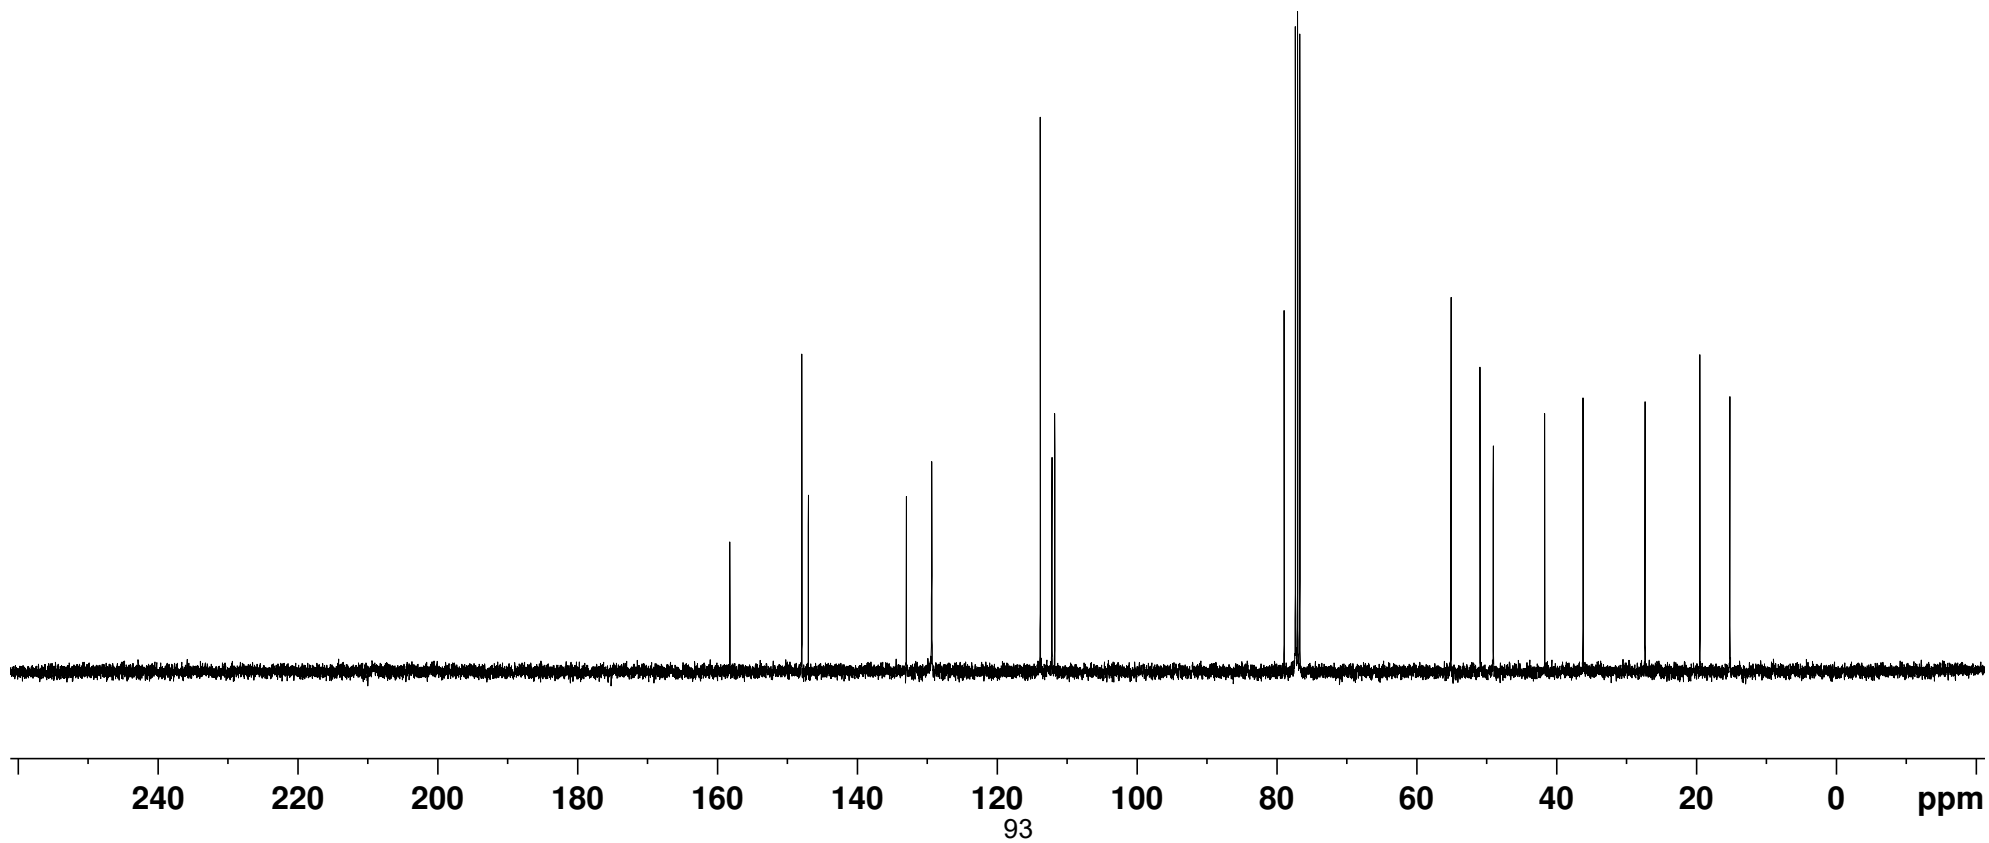

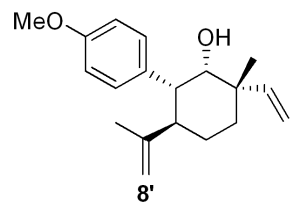

<sup>1</sup>H NMR (400 MHz, CDCl<sub>3</sub>)

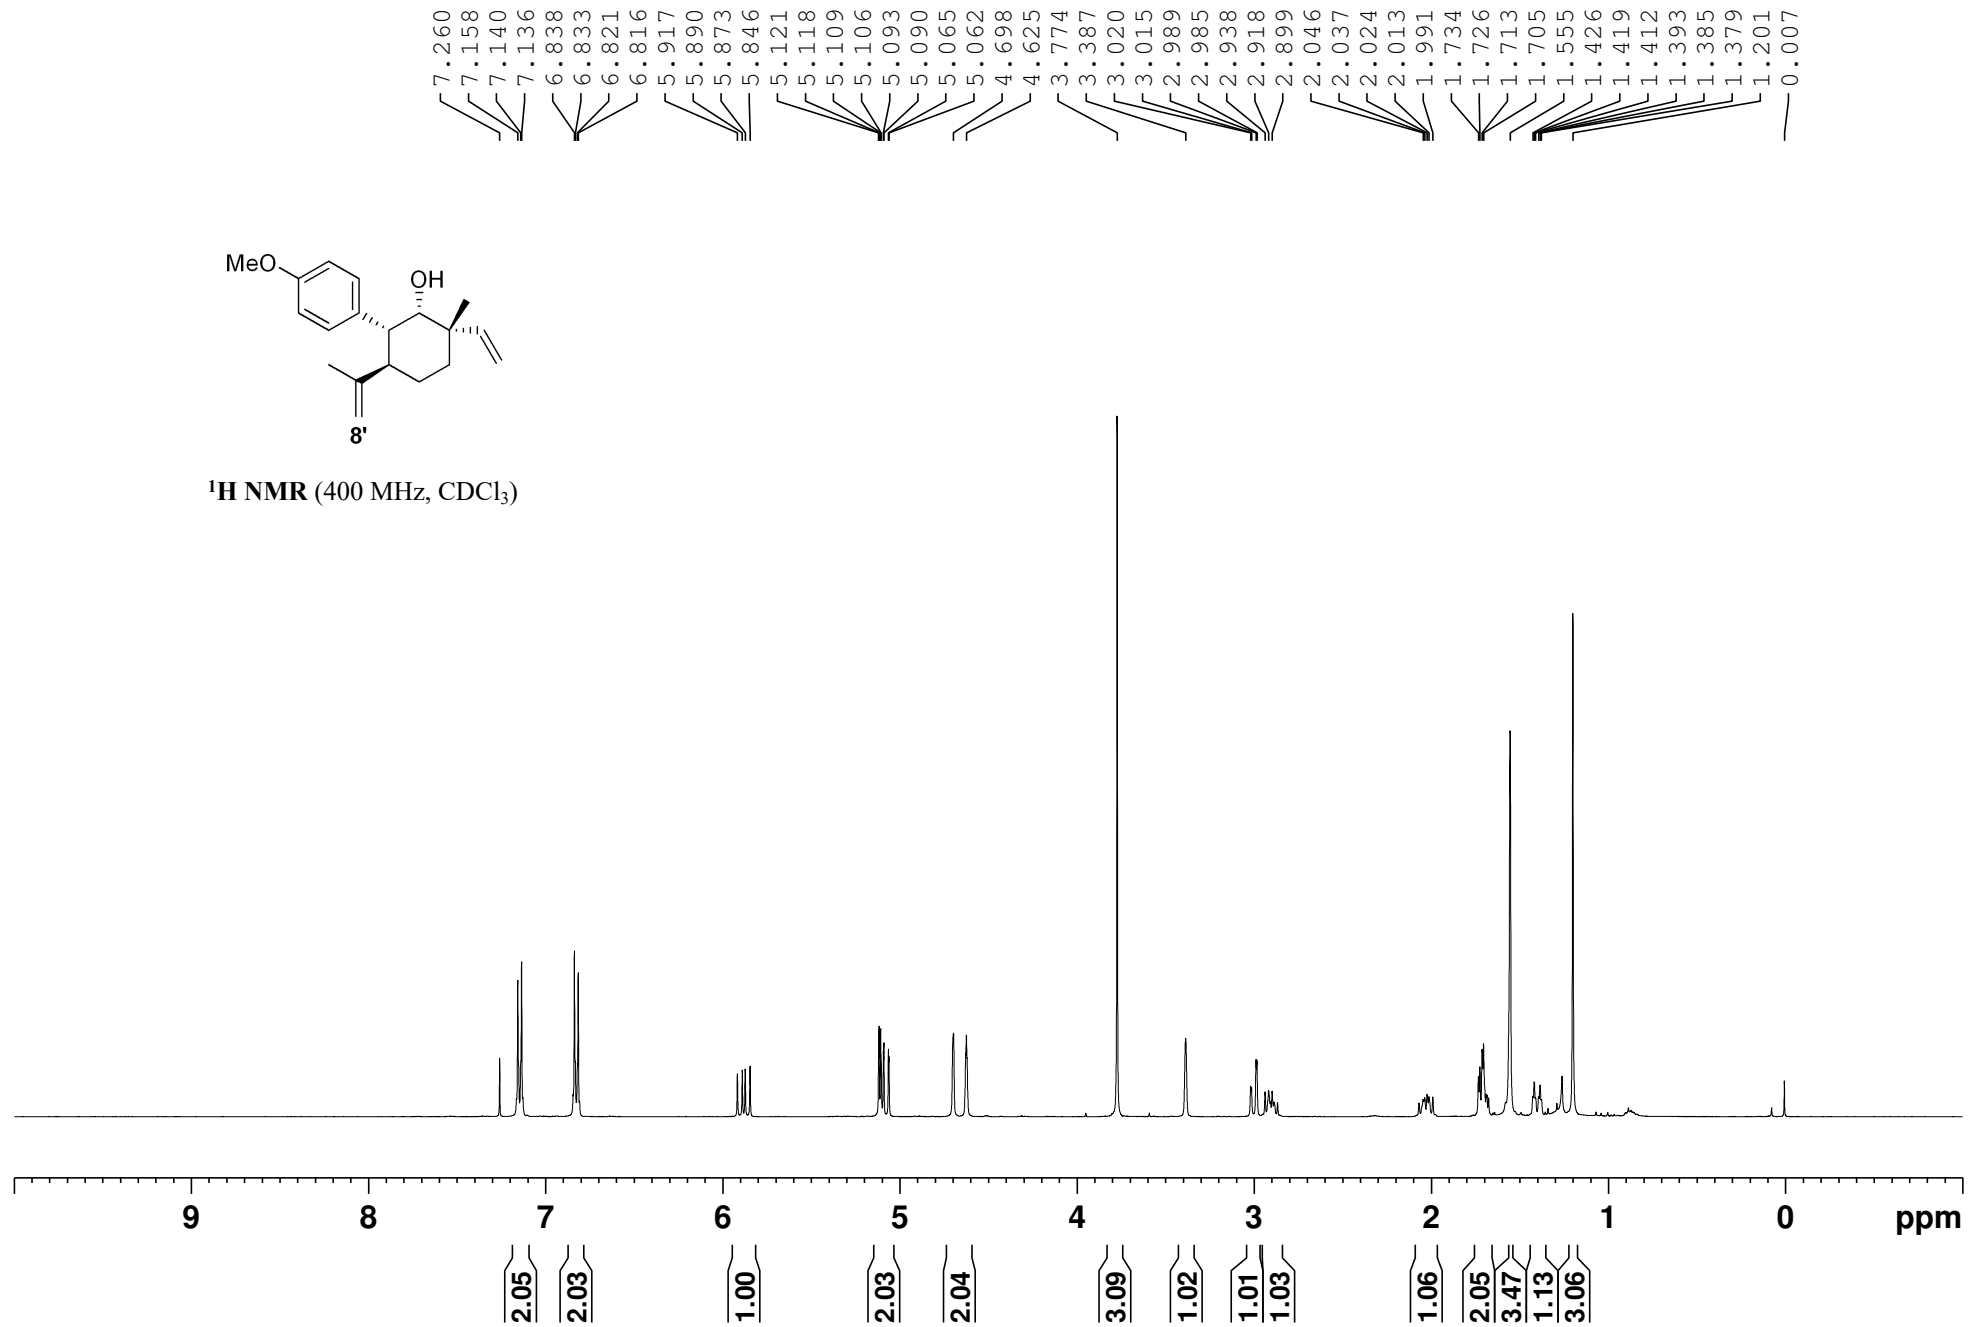

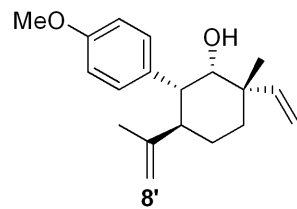

<sup>13</sup>C NMR (100 MHz, CDCl<sub>3</sub>)

— 157.96  
〈 147.91  
   146.98  
— 134.10  
— 129.79  
   113.44  
   112.82  
   111.89  
   77.49  
   77.31  
   76.99  
   76.68  
— 55.07  
〈 45.39  
   41.97  
   41.40  
   28.47  
   28.02  
— 22.37  
   19.18

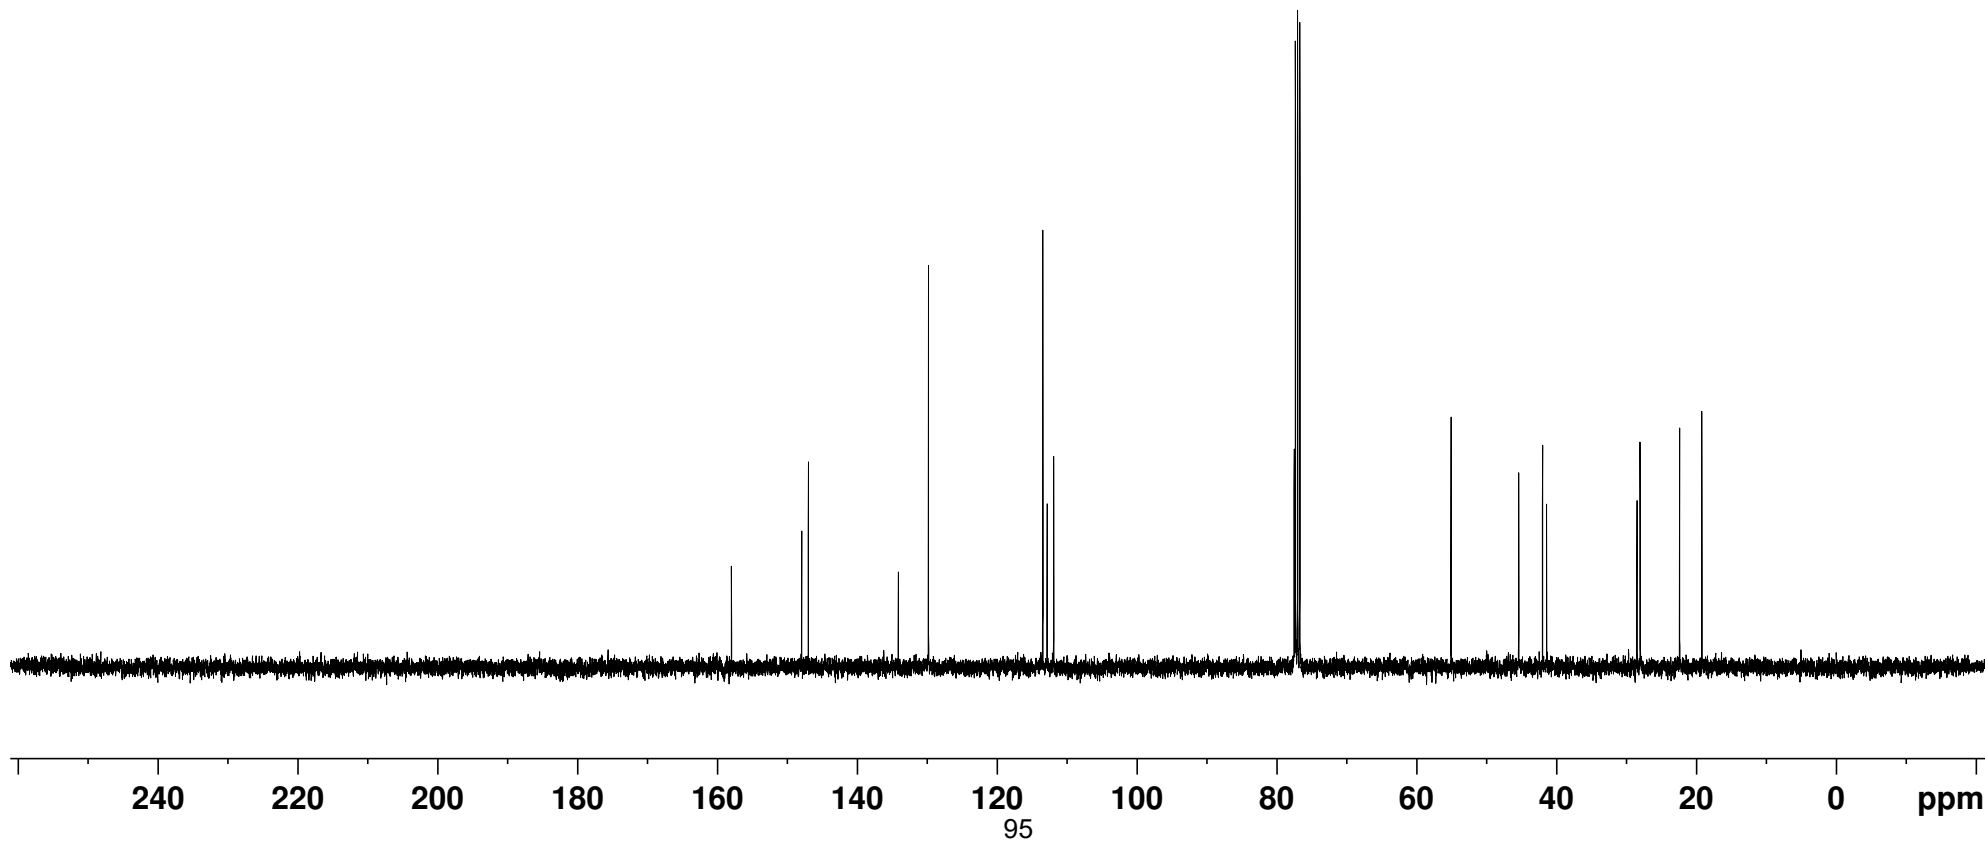

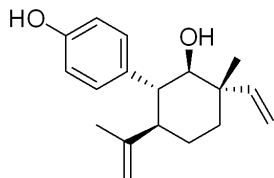

**Psoracorylifol F (1a)**

<sup>1</sup>H NMR (600 MHz, methanol-d<sub>4</sub>)

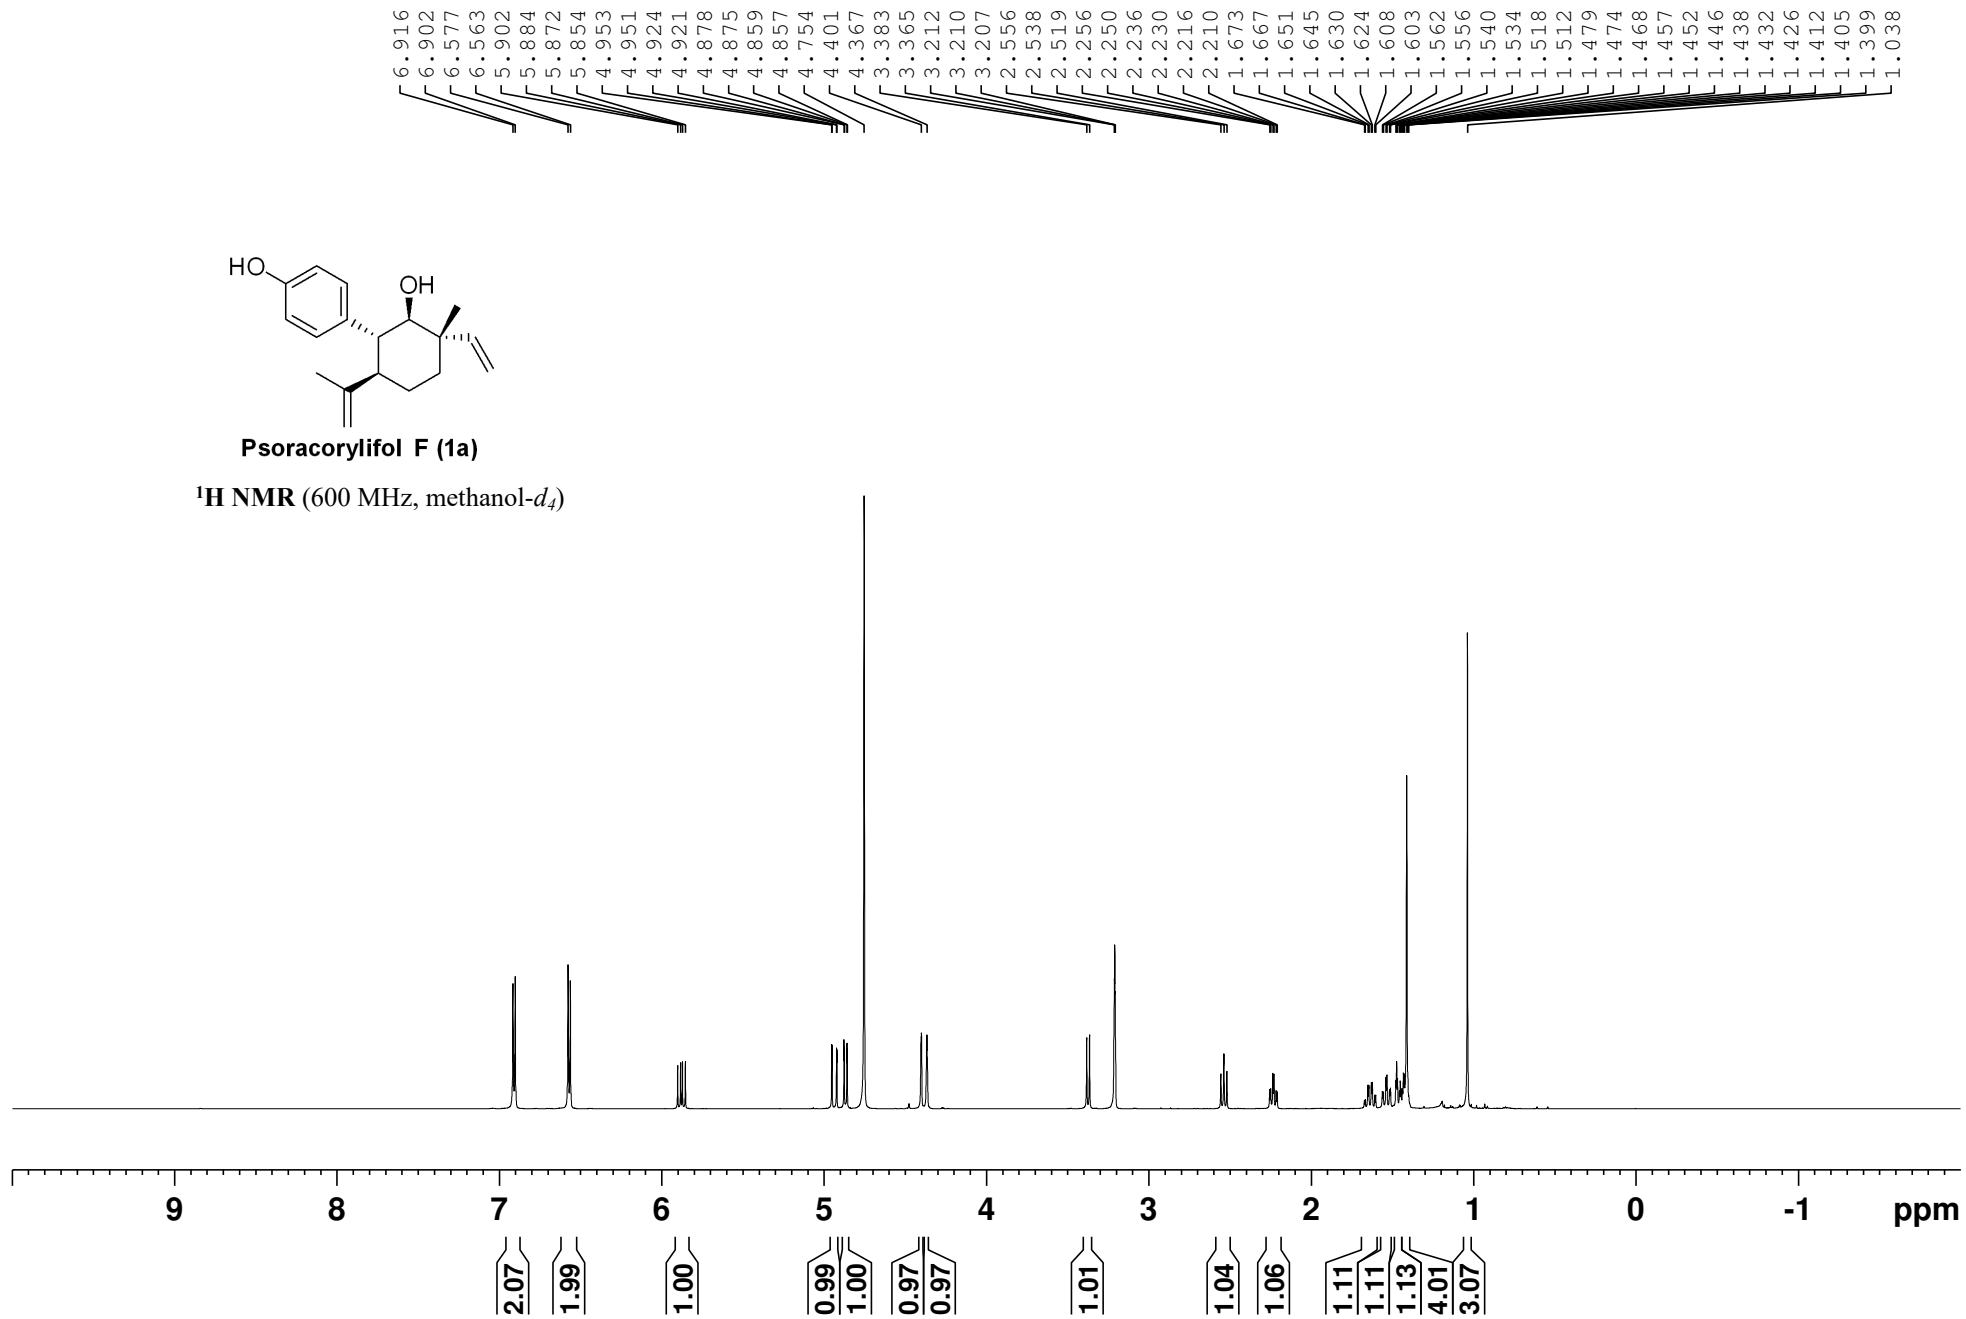

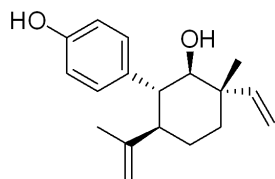

**Psoracorylifol F (1a)**

$^{13}\text{C}$  NMR (150 MHz, methanol- $d_4$ )

- 156.79
- 150.05
- 149.05
- 134.69
- 130.95
- 116.05
- 112.31
- 111.91
- 80.61
- 53.37
- 50.97
- 49.72
- 49.57
- 49.43
- 49.29
- 49.15
- 49.01
- 48.86
- 43.32
- 37.62
- 28.85
- 20.14
- 16.61

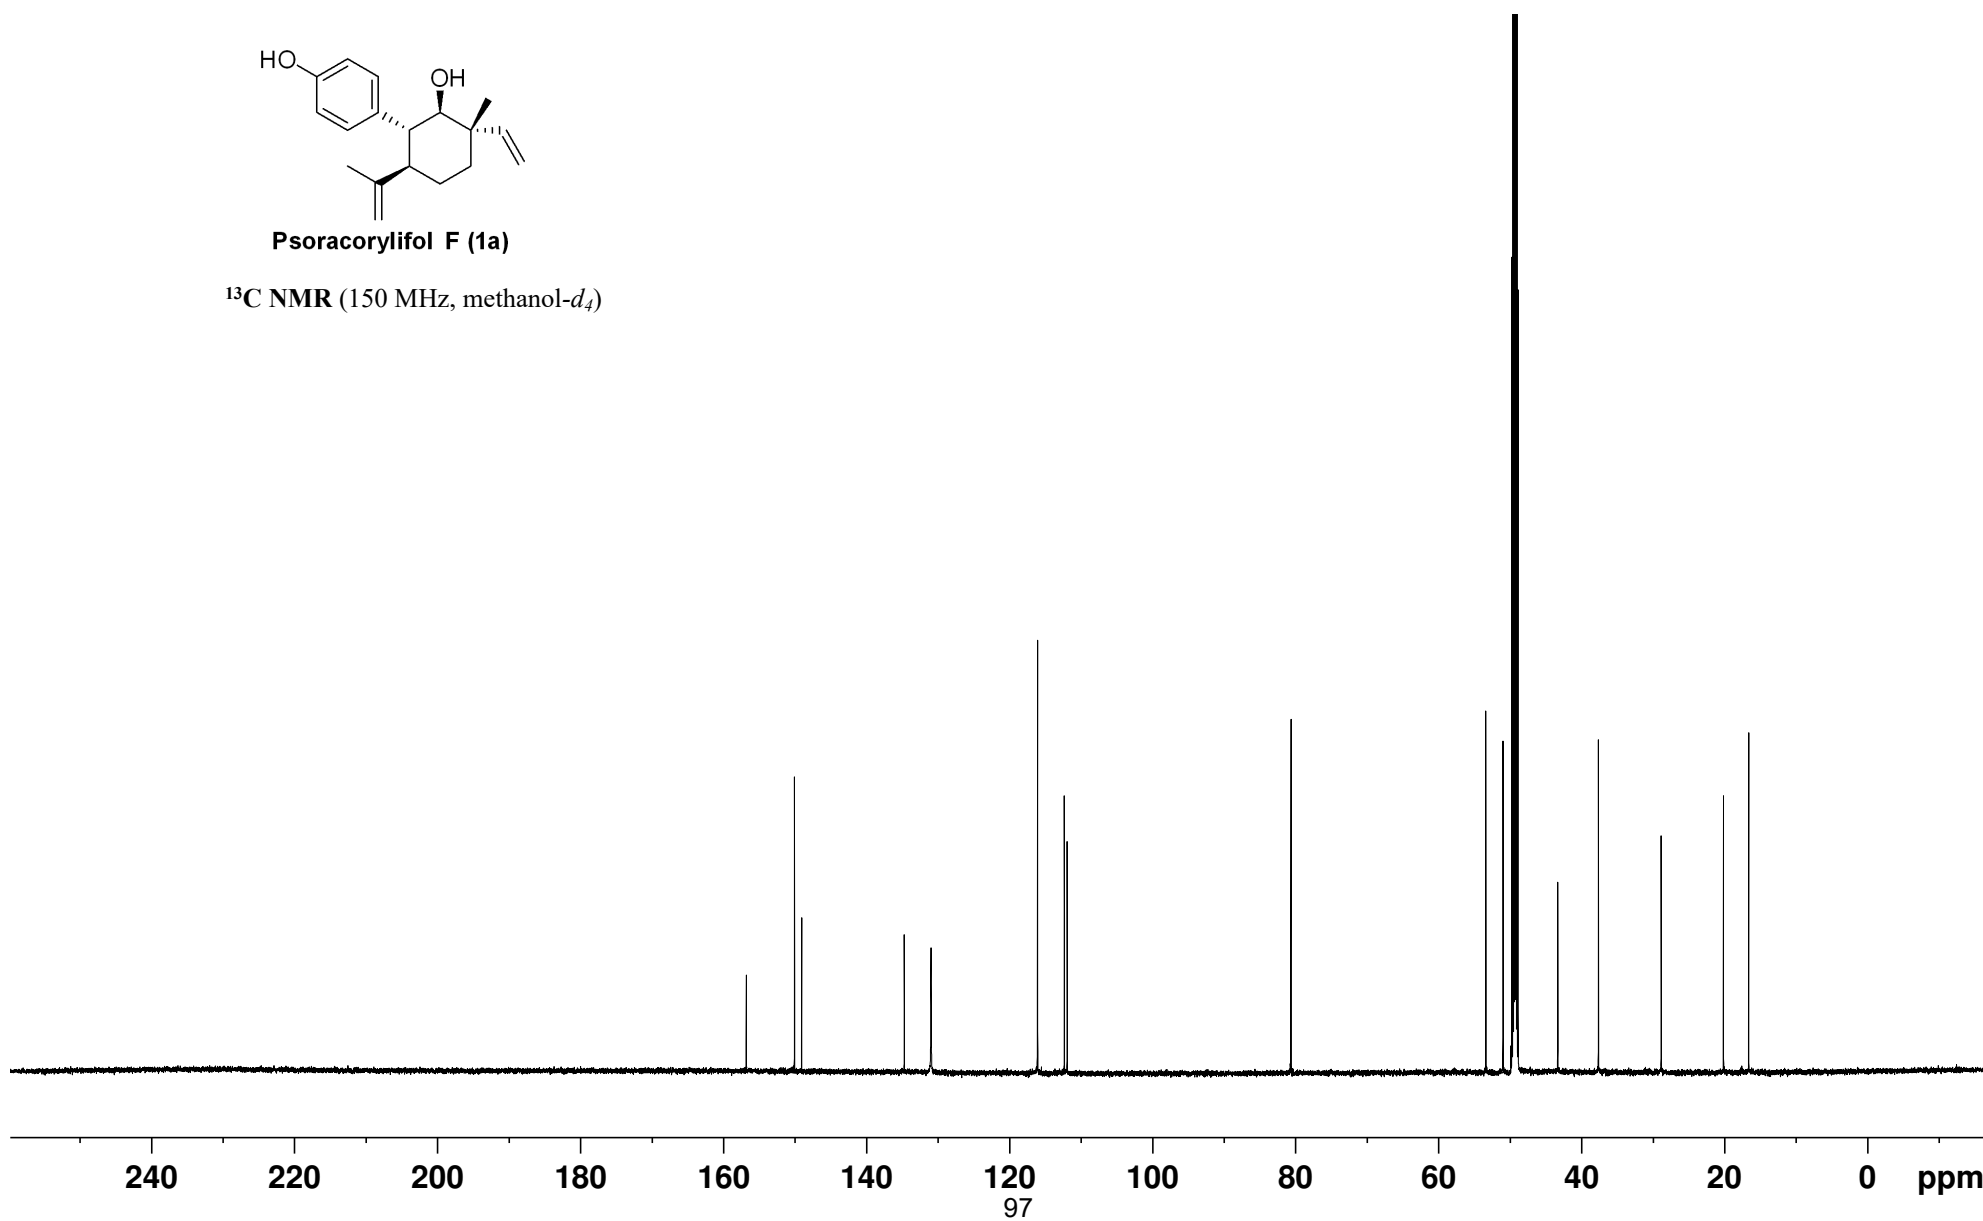

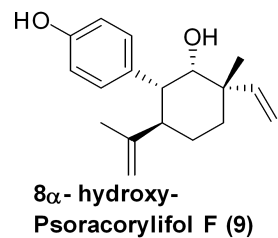

$^1\text{H NMR}$  (600 MHz,  $\text{CDCl}_3$ )

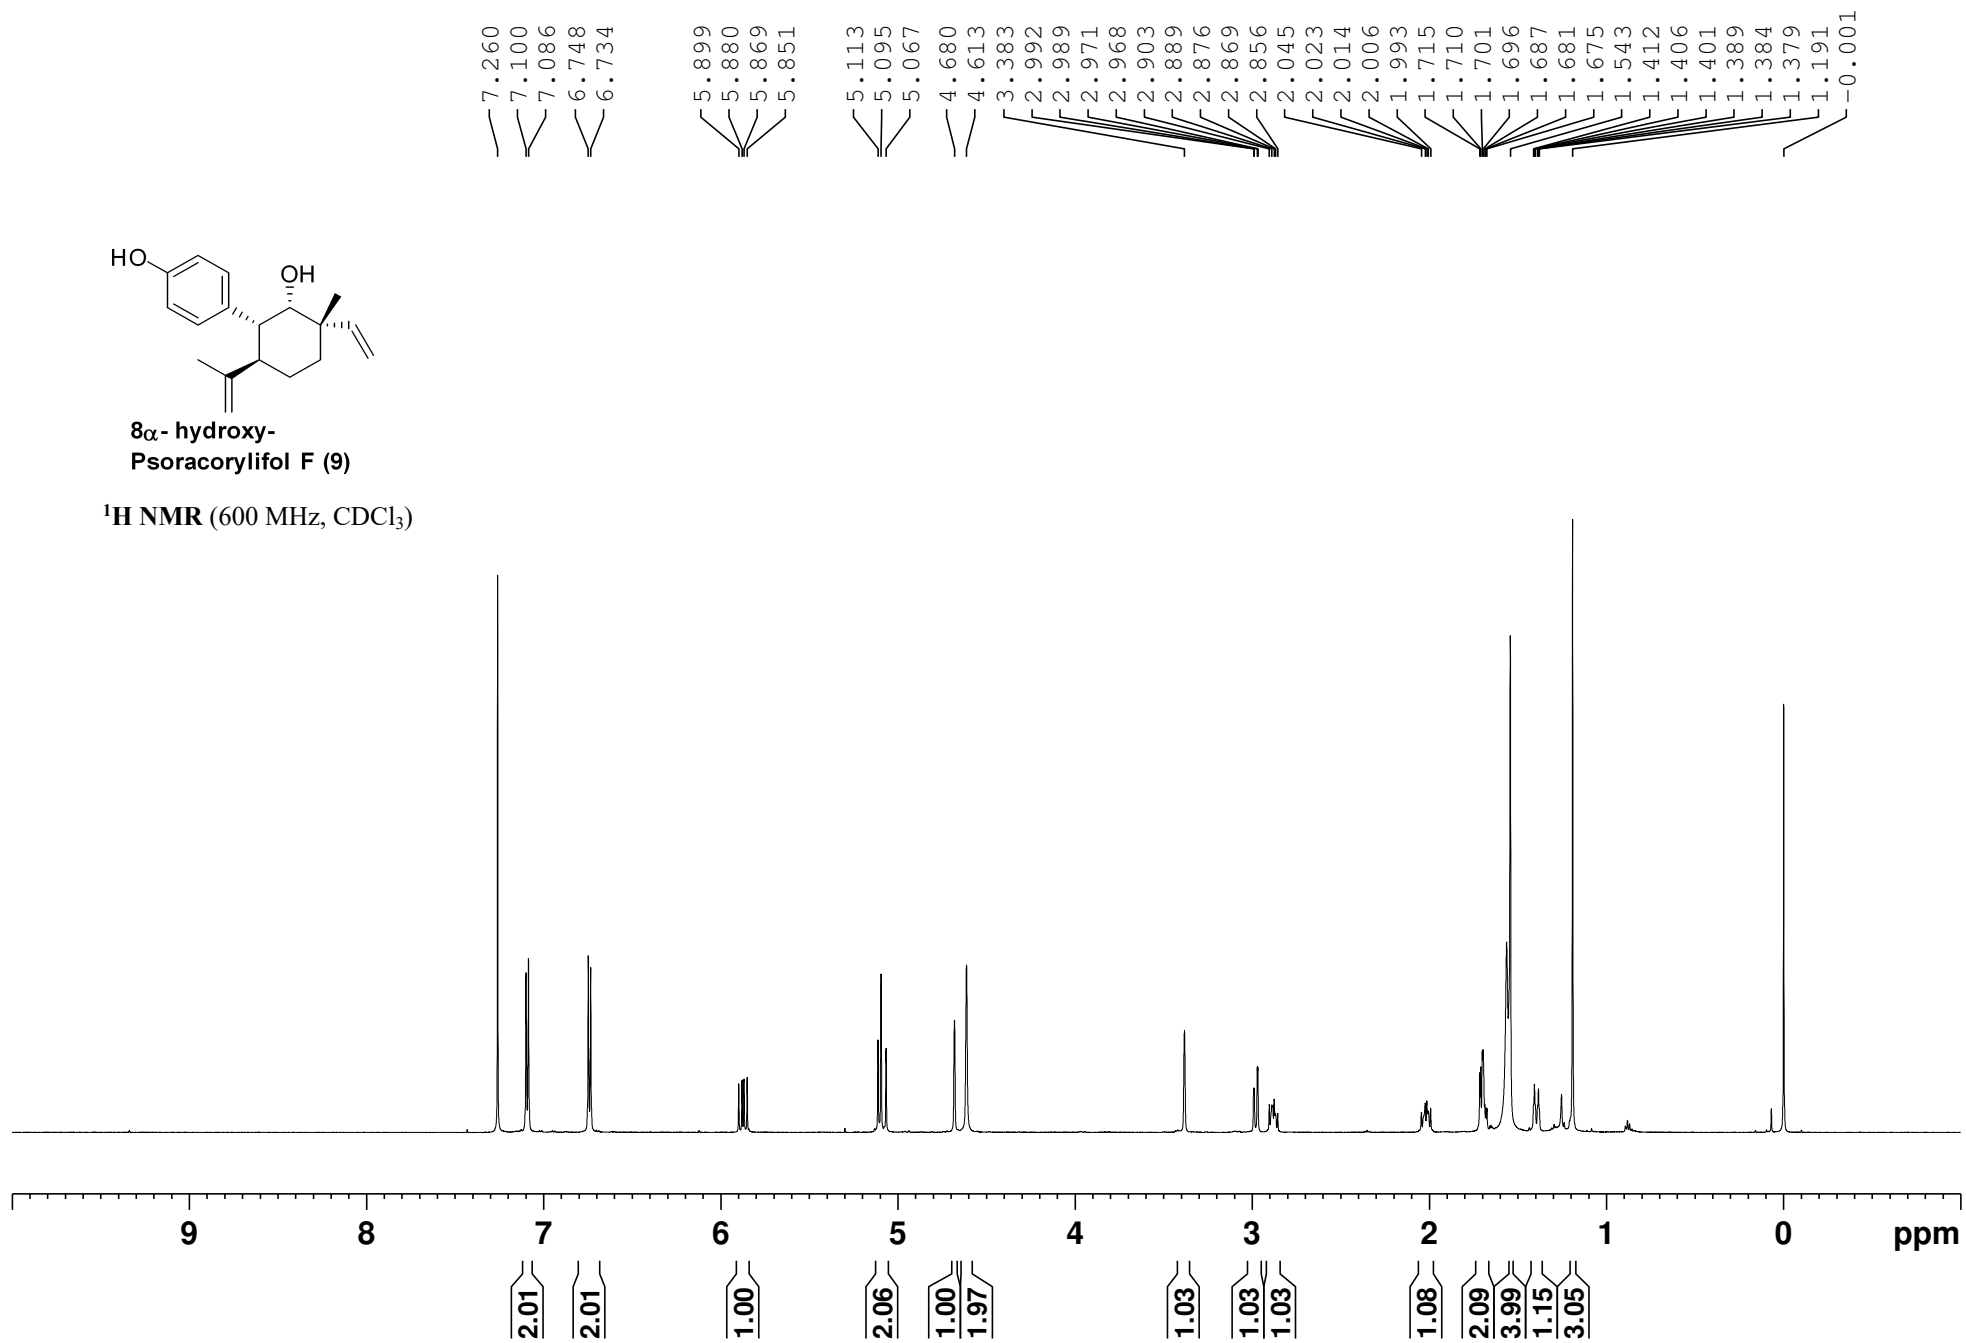

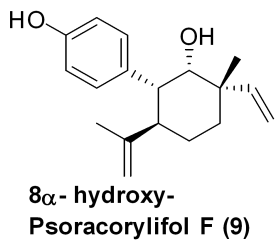

$^{13}\text{C}$  NMR (150 MHz,  $\text{CDCl}_3$ )

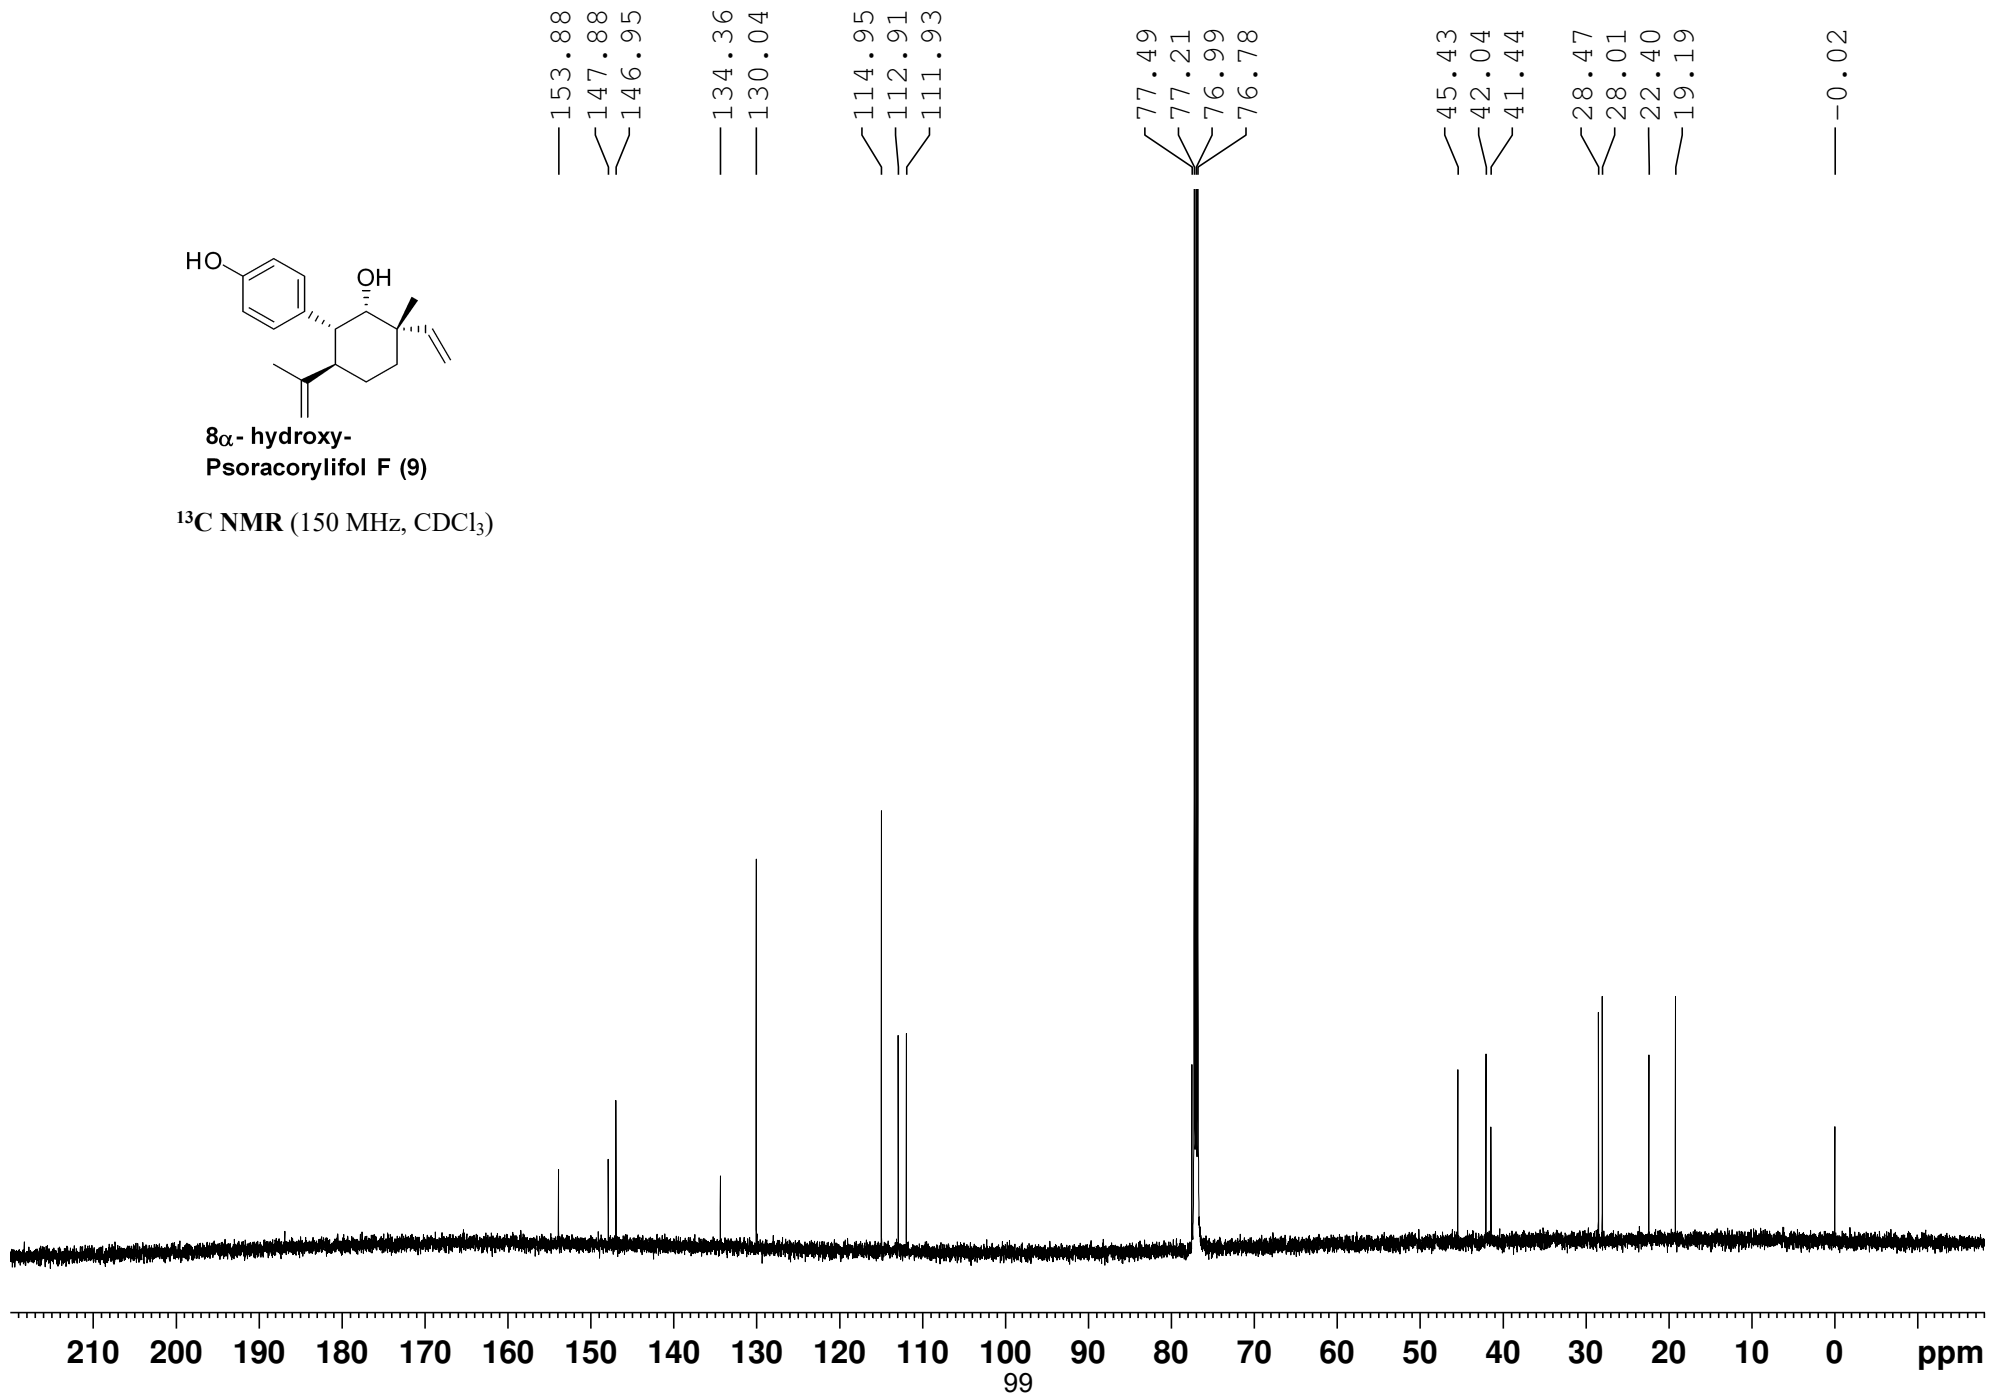

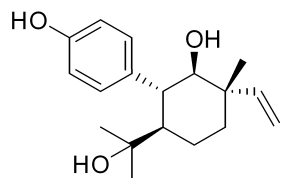

**7 $\alpha$ ,8 $\beta$ -hydroxy-12  $\beta$ -Cyclobakuchiol C (1b)**

<sup>1</sup>H NMR (600 MHz, acetone-*d*<sub>6</sub>)

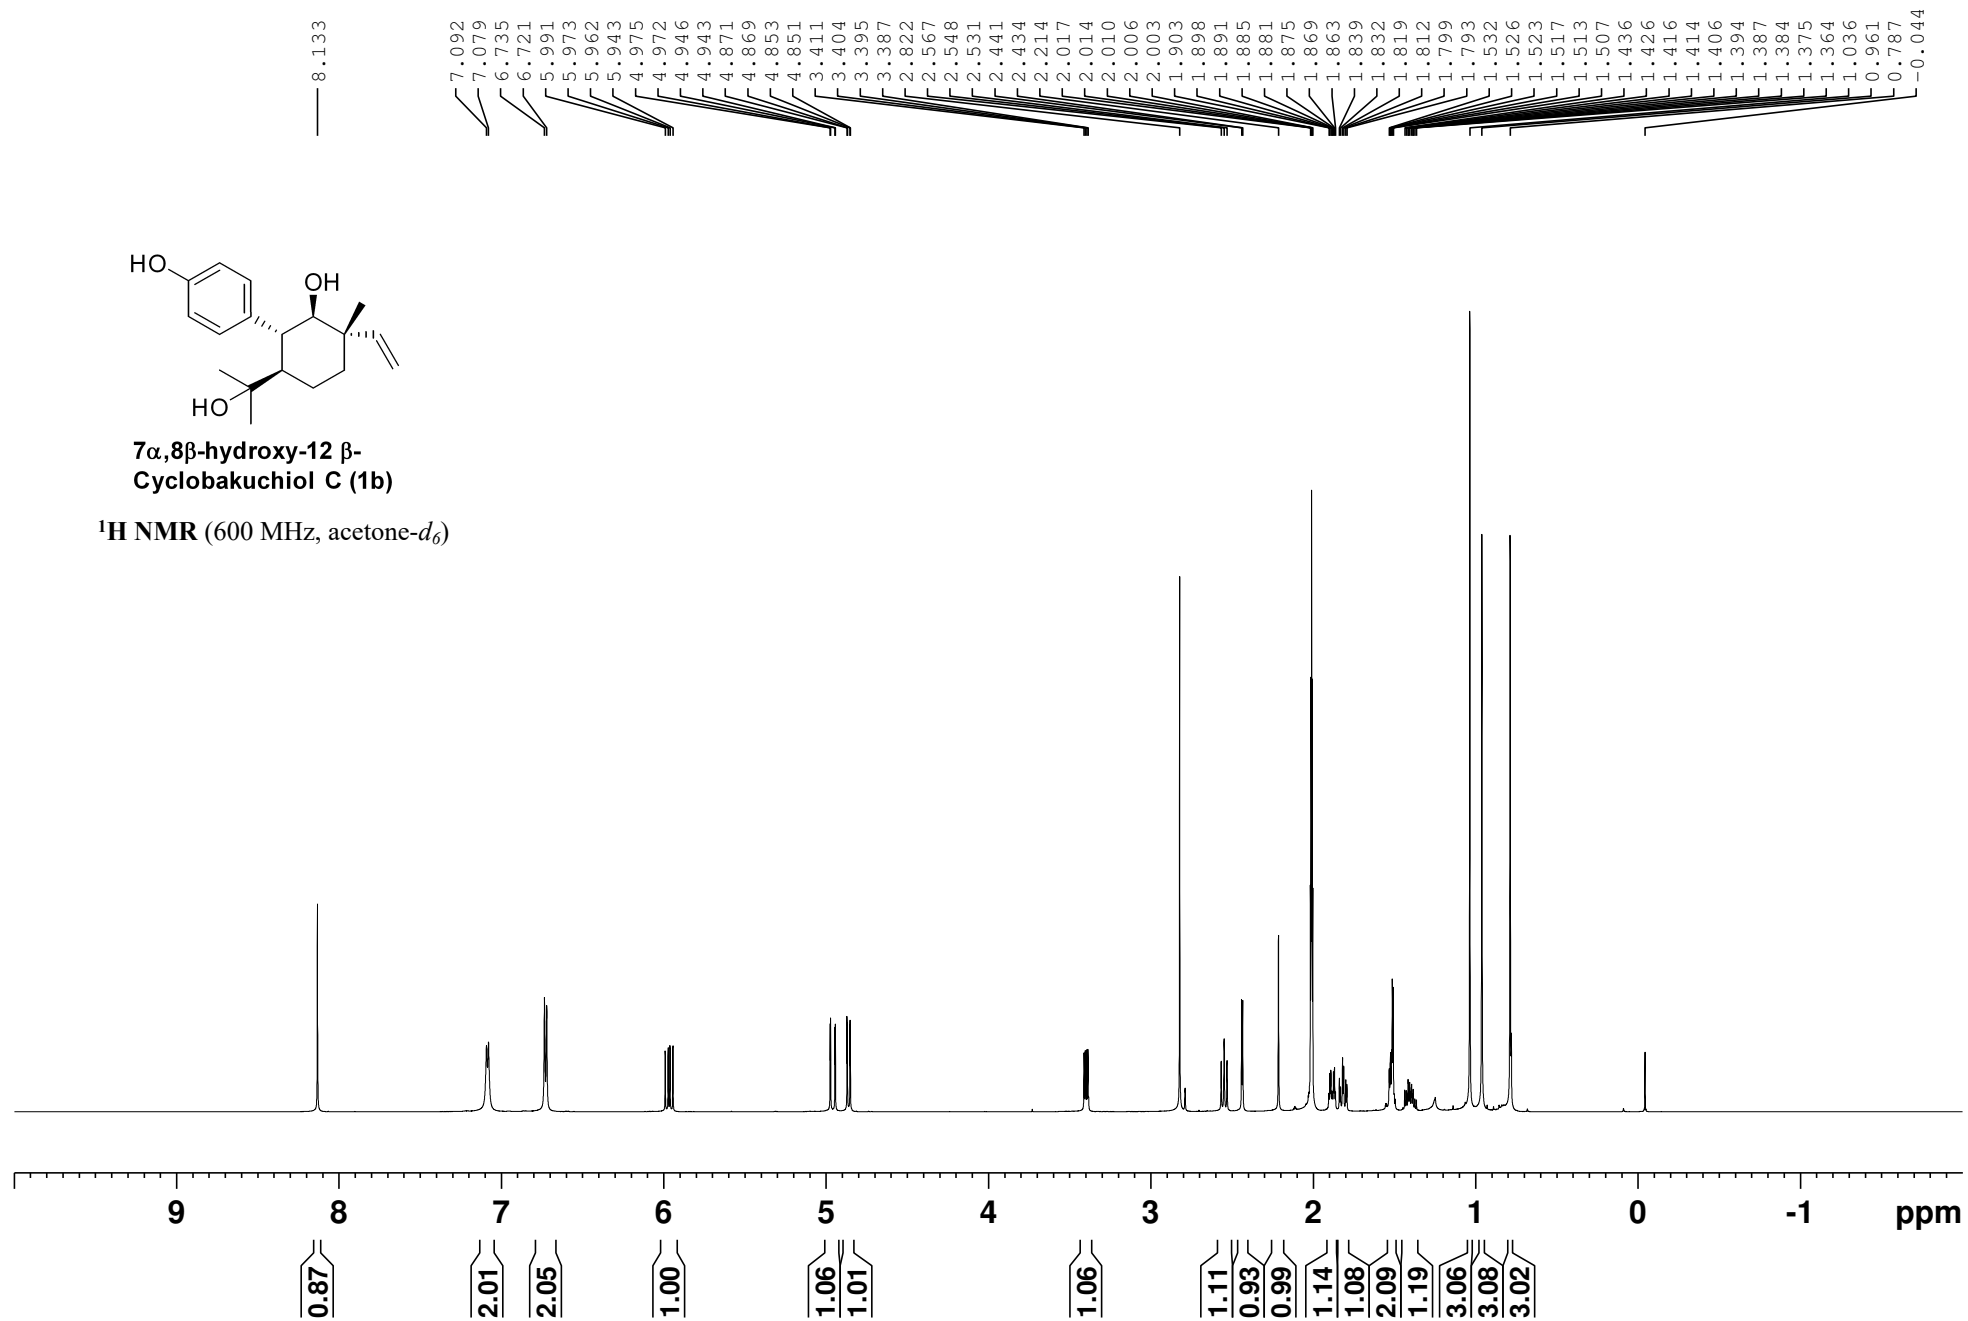



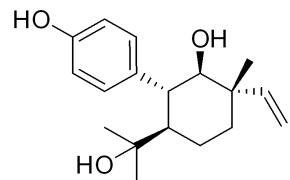

**7 $\alpha$ ,8 $\beta$ -hydroxy-12  $\beta$ -  
Cyclobakuchiol C (1b)**

$^{13}\text{C}$  NMR (100 MHz, acetone- $d_6$ )

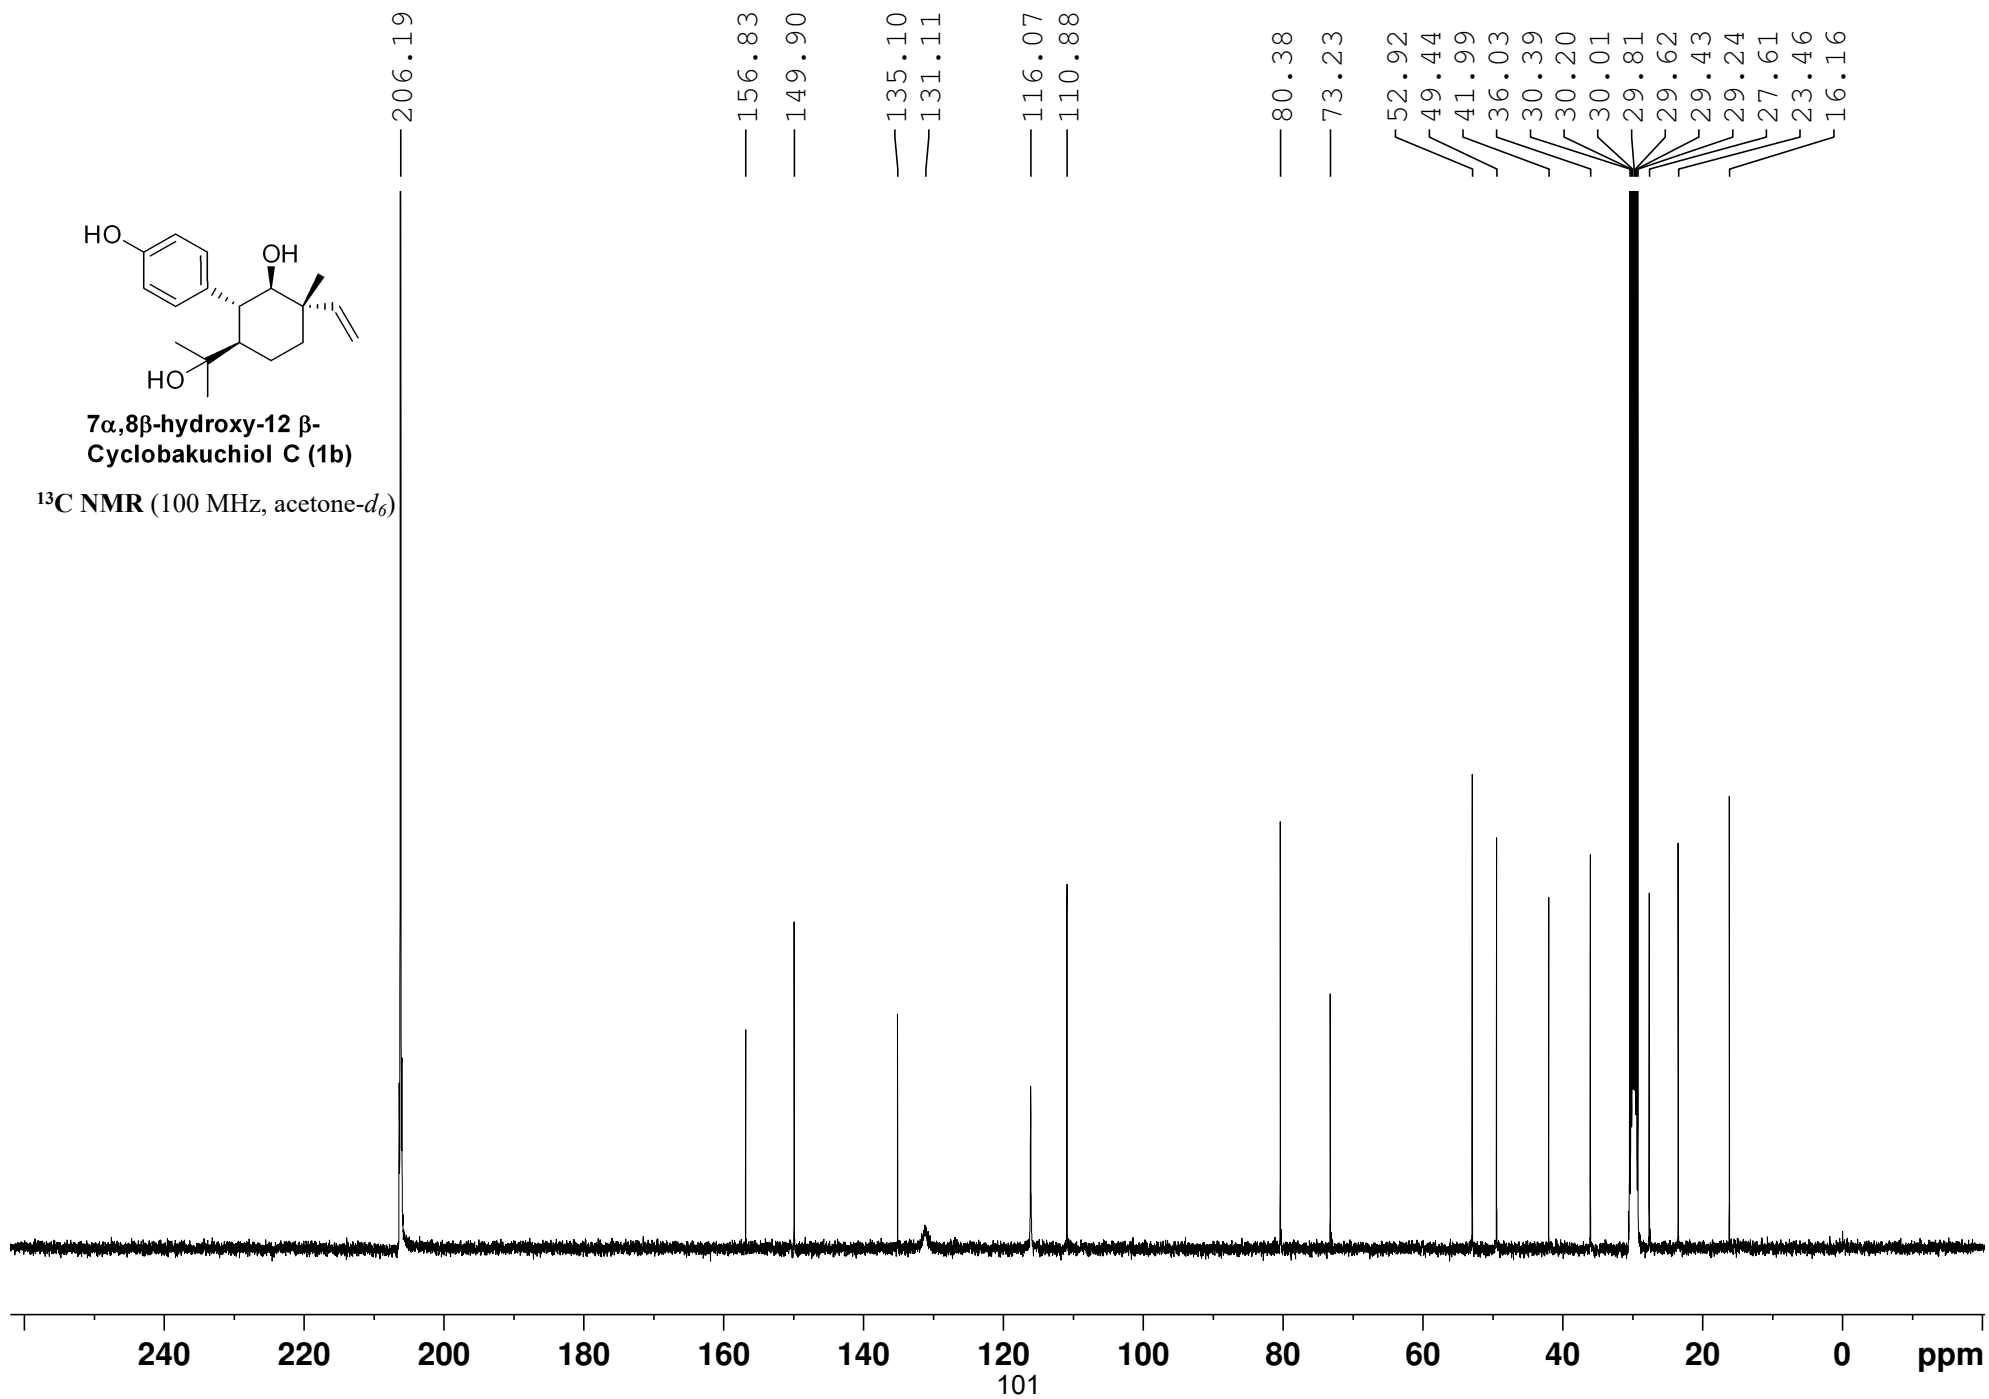

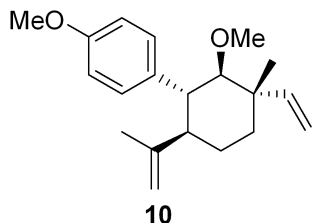

<sup>1</sup>H NMR (600 MHz, CDCl<sub>3</sub>)

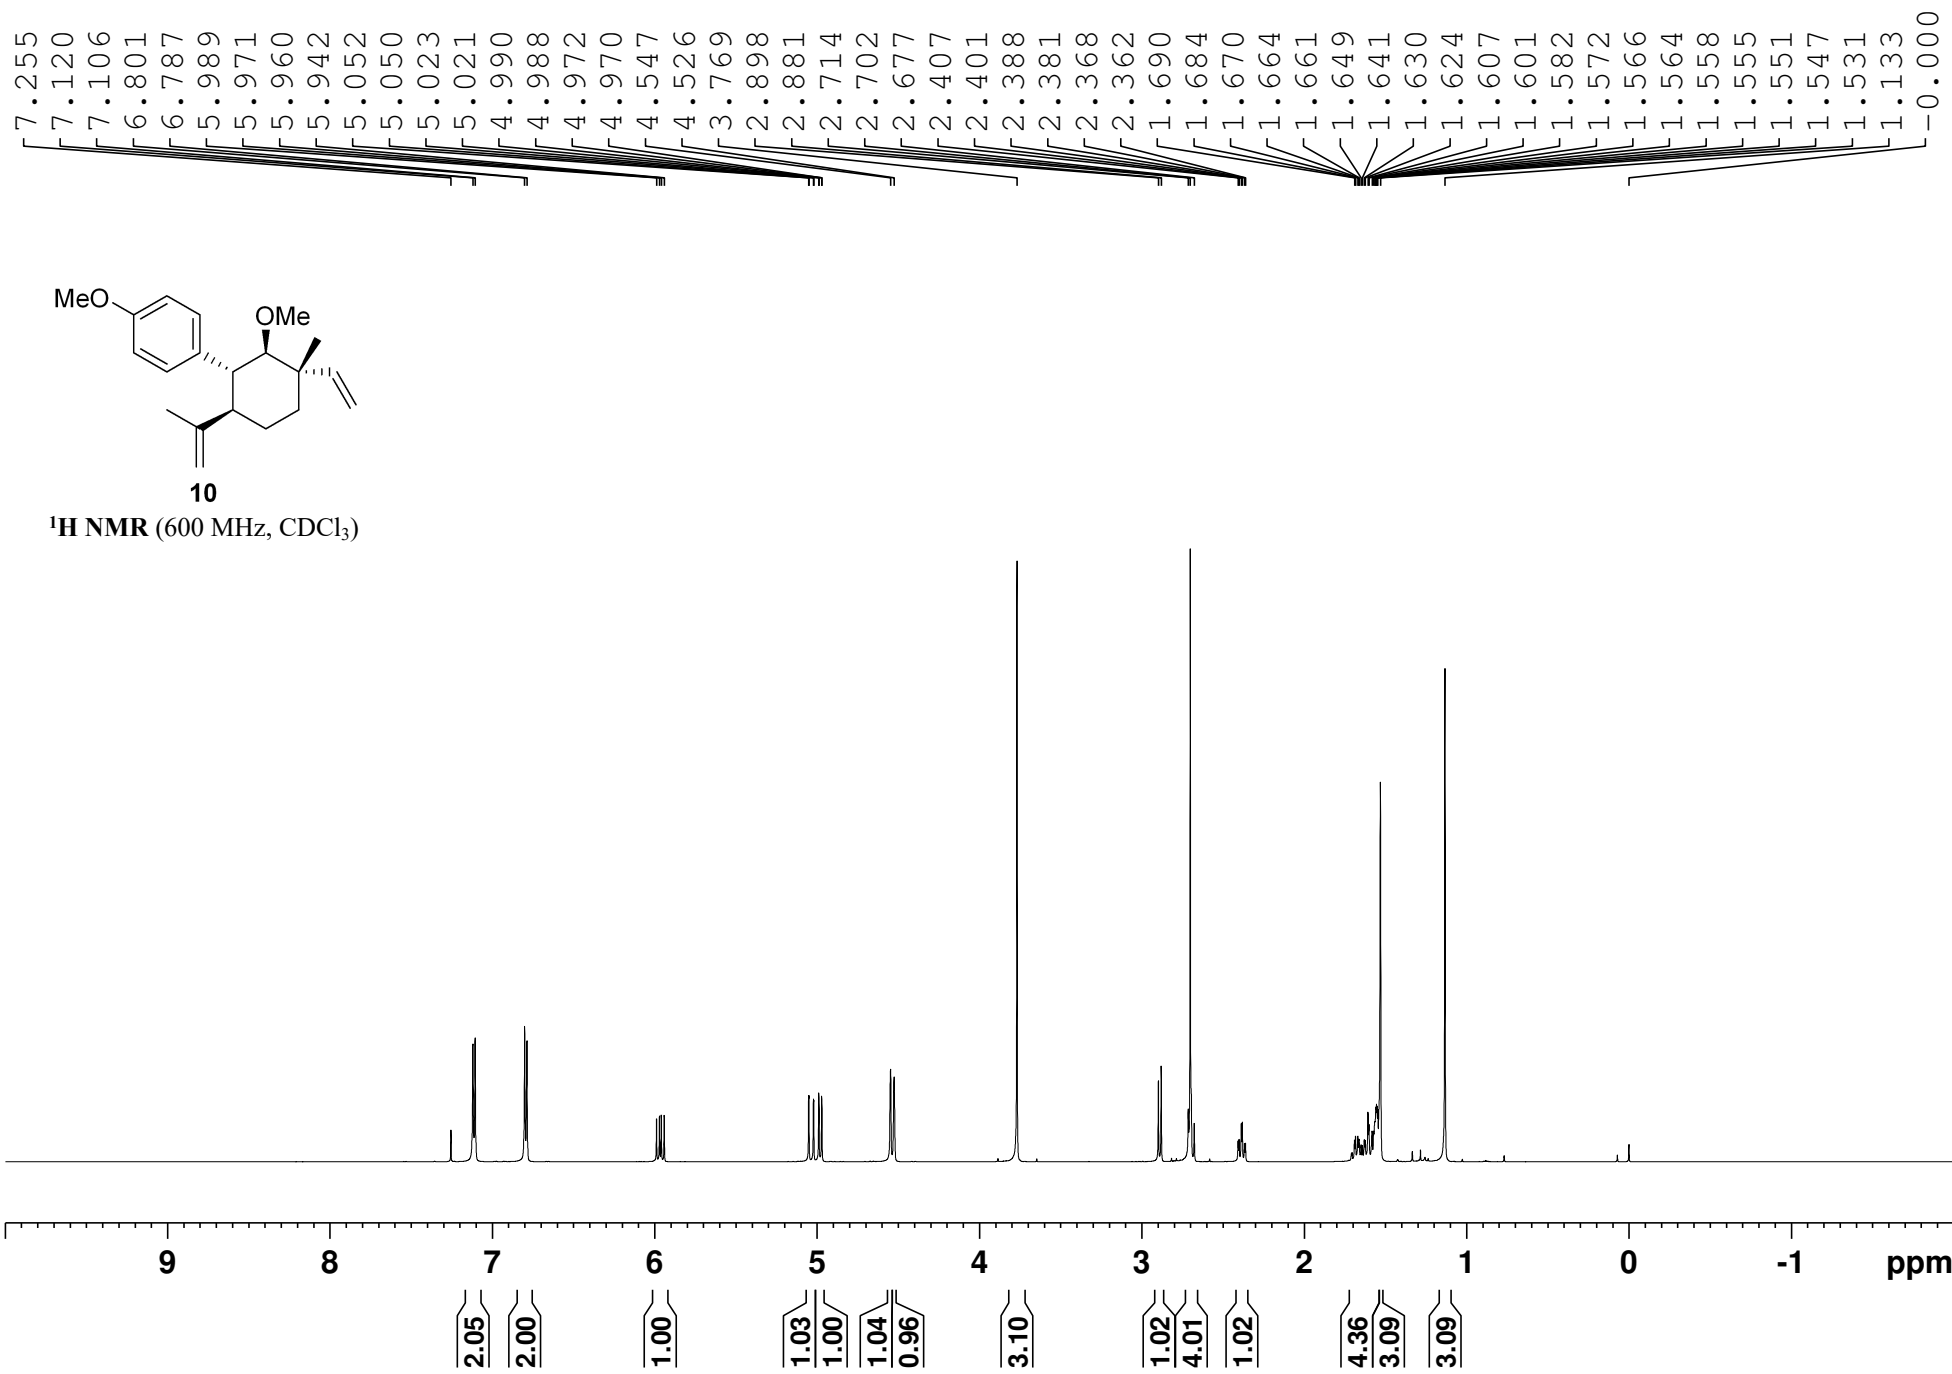

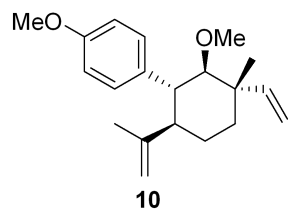

<sup>13</sup>C NMR (150 MHz, CDCl<sub>3</sub>)

- 157.78
- 148.29
- 147.08
- 134.23
- 129.54
- 113.17
- 111.69
- 111.04
- 90.77
- 77.21
- 77.00
- 76.78
- 61.16
- 55.02
- 50.80
- 48.53
- 42.24
- 35.93
- 27.23
- 19.31
- 16.41

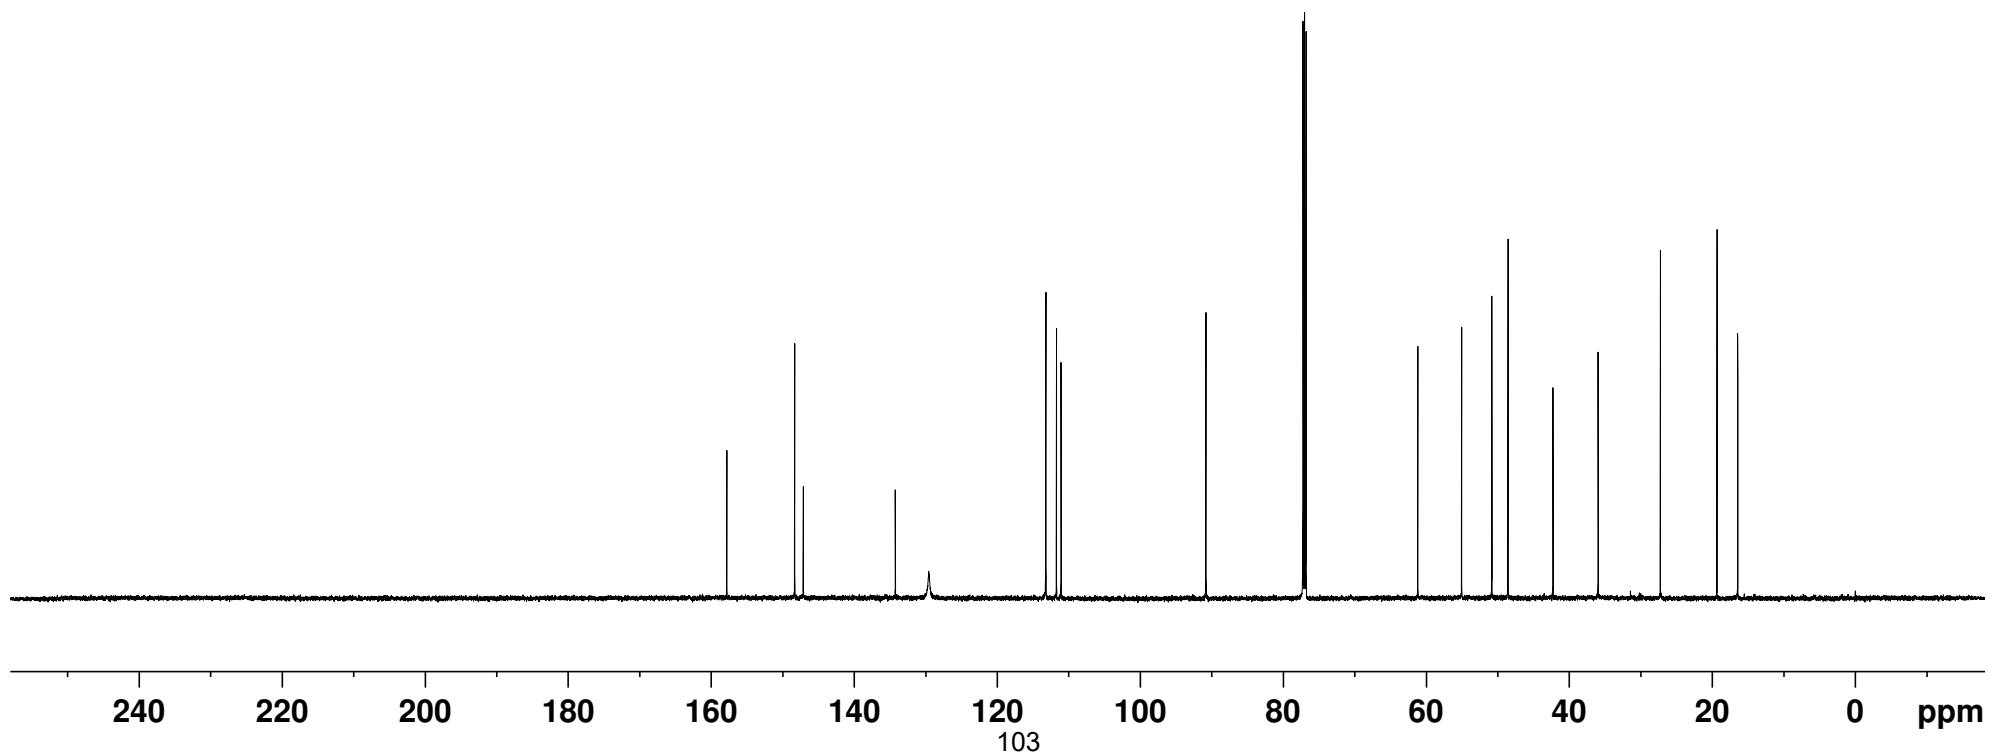

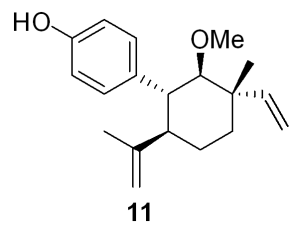

<sup>1</sup>H NMR (400 MHz, CDCl<sub>3</sub>)

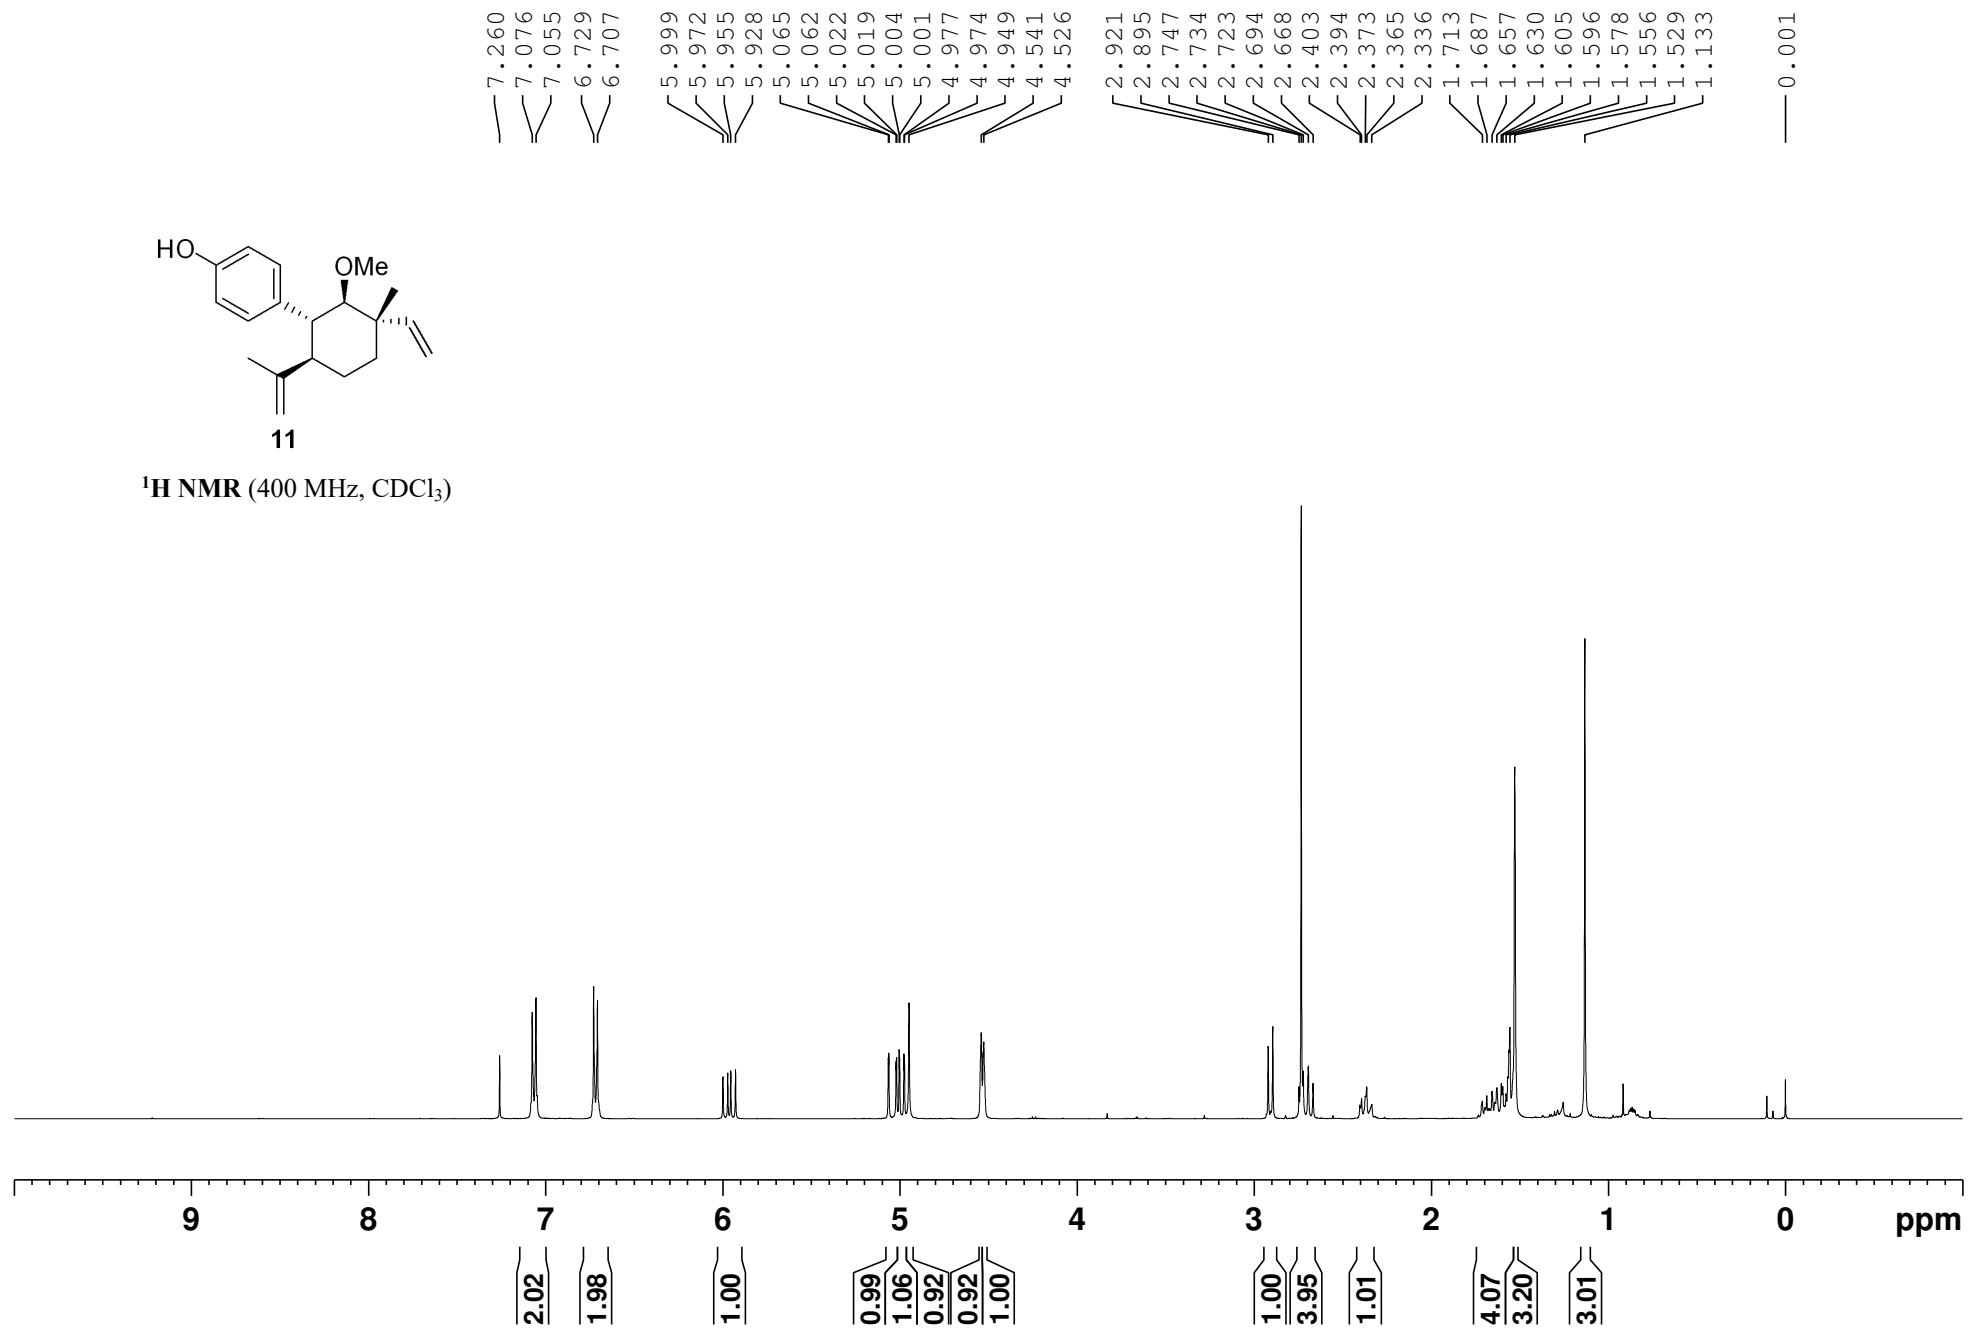

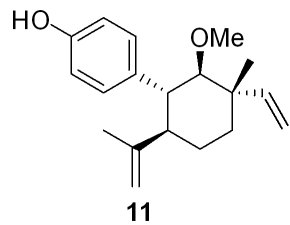

<sup>13</sup>C NMR (100 MHz, CDCl<sub>3</sub>)

- 153.75
- 148.21
- 147.03
- 134.31
- 129.72
- 114.81
- 111.73
- 111.16
- 90.92
- 77.31
- 77.00
- 76.68
- 61.18
- 50.89
- 48.52
- 42.26
- 35.98
- 27.18
- 19.32
- 16.38

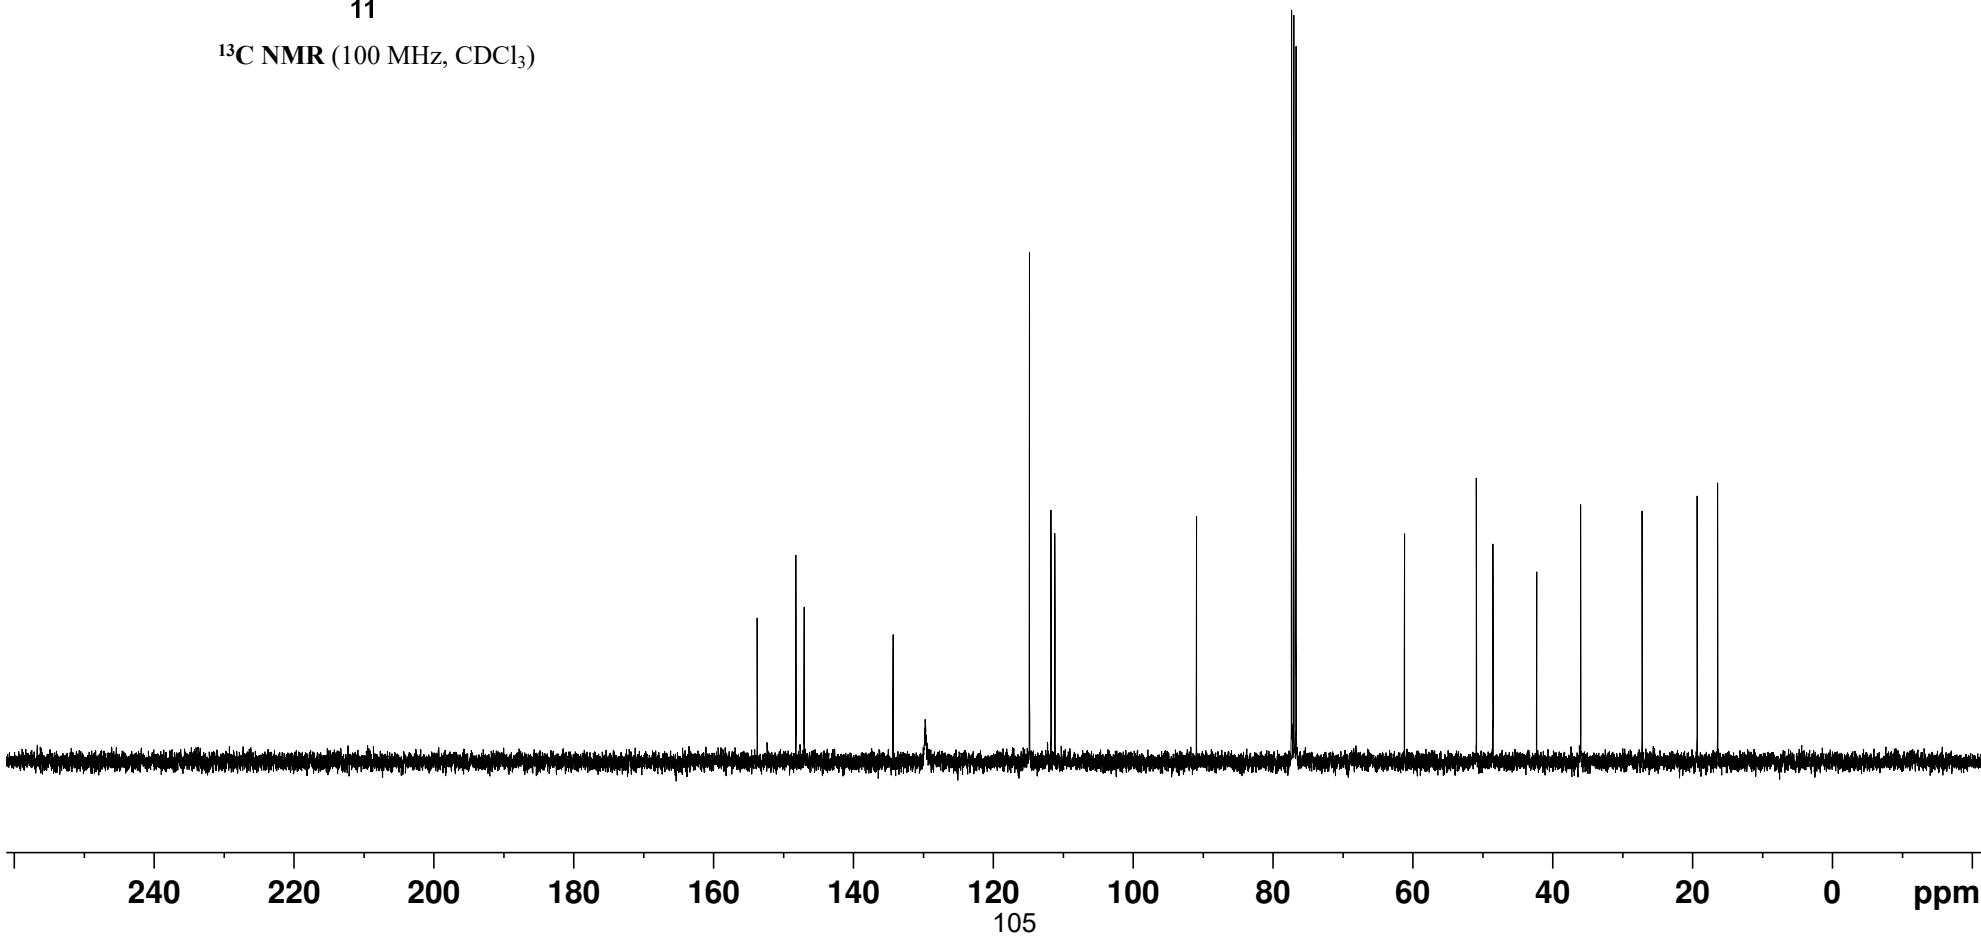

6.654  
6.640  
6.545  
6.533  
6.001  
5.983  
5.972  
5.954  
5.050  
5.048  
5.020  
5.018  
4.983  
4.981  
4.965  
4.963  
4.882  
4.547  
4.545  
4.501  
4.499  
3.315  
3.313  
3.310  
3.307  
3.305  
3.007  
2.990  
2.768  
2.601  
2.581  
2.564  
2.402  
2.396  
2.382  
2.376  
2.357  
1.706  
1.699  
1.683  
1.680  
1.667  
1.663  
1.645  
1.639  
1.534  
1.519  
1.516  
1.510  
1.505  
1.499  
1.493  
1.106

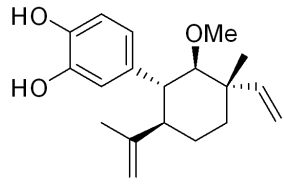

proposed  
Corypsoriol J (1c)

<sup>1</sup>H NMR (600 MHz, methanol-*d*<sub>4</sub>)

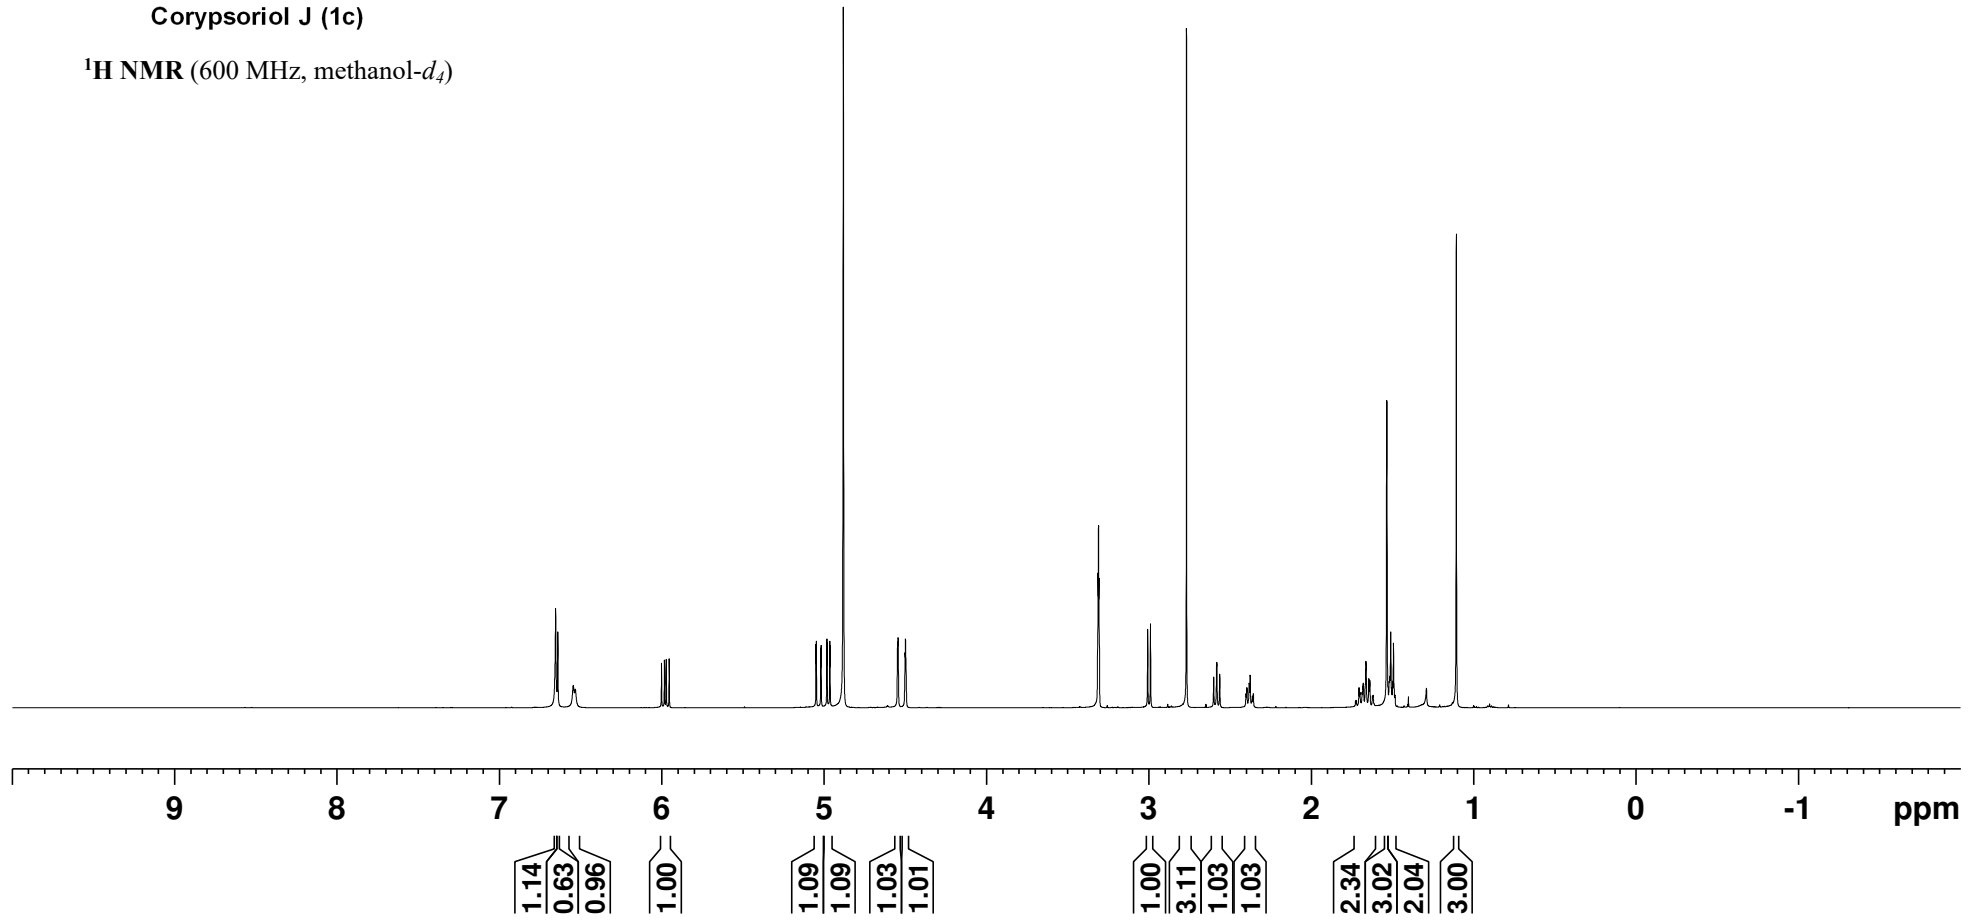



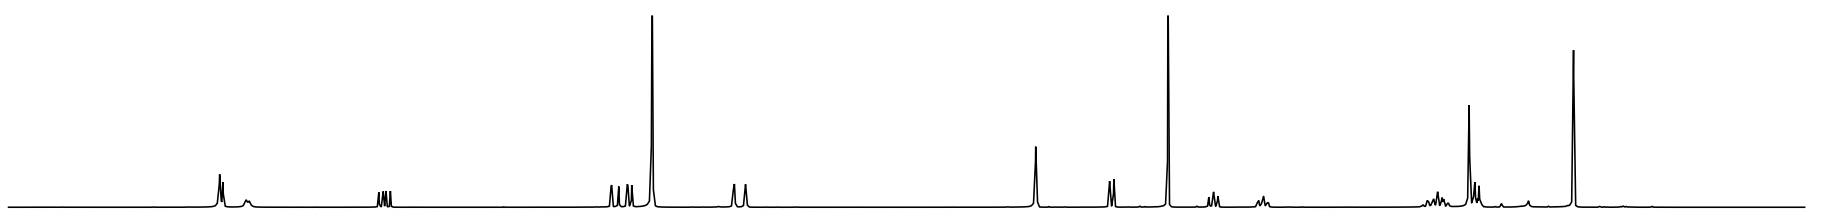

$^1\text{H}$ - $^1\text{H}$  COSY

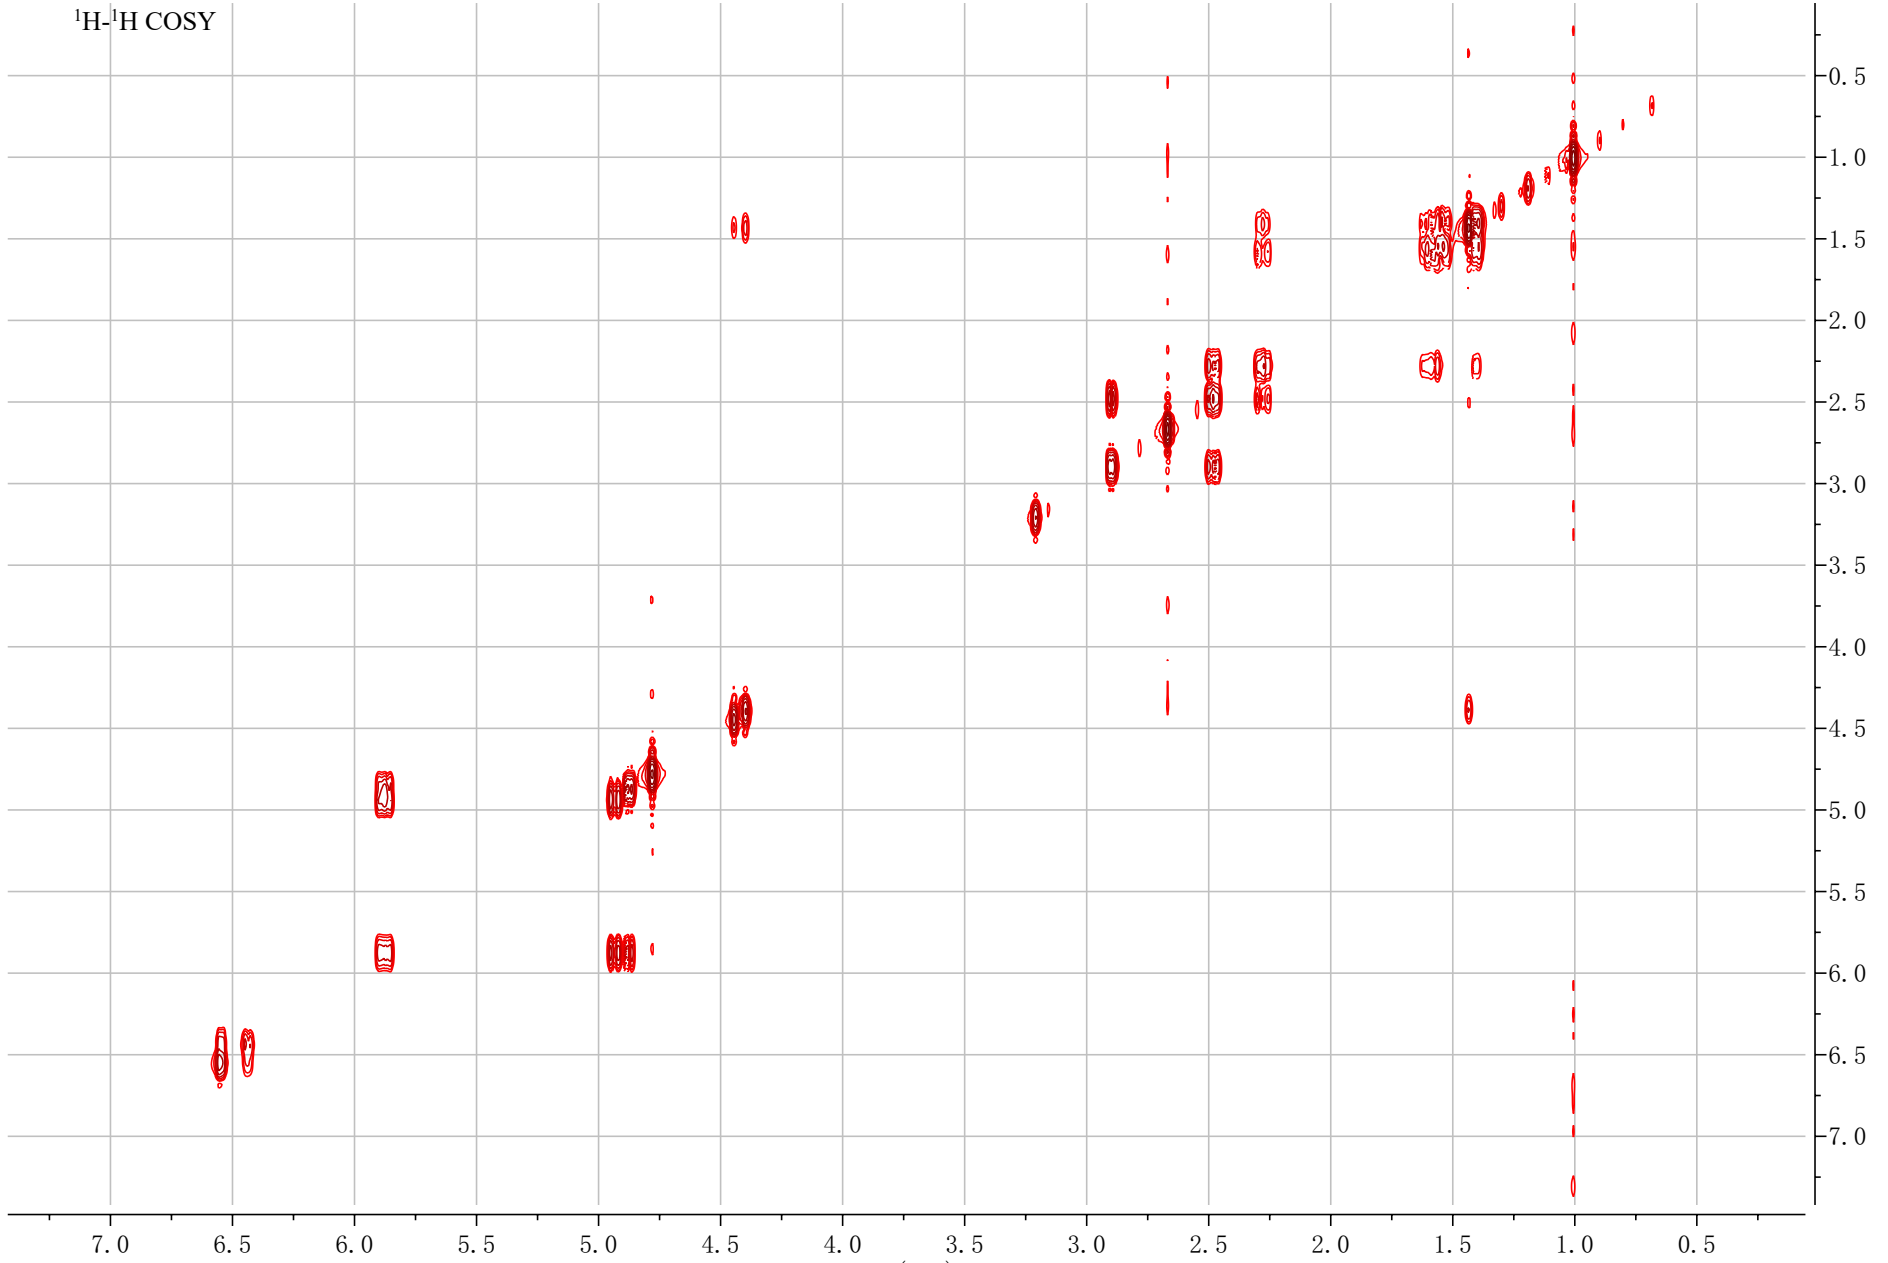



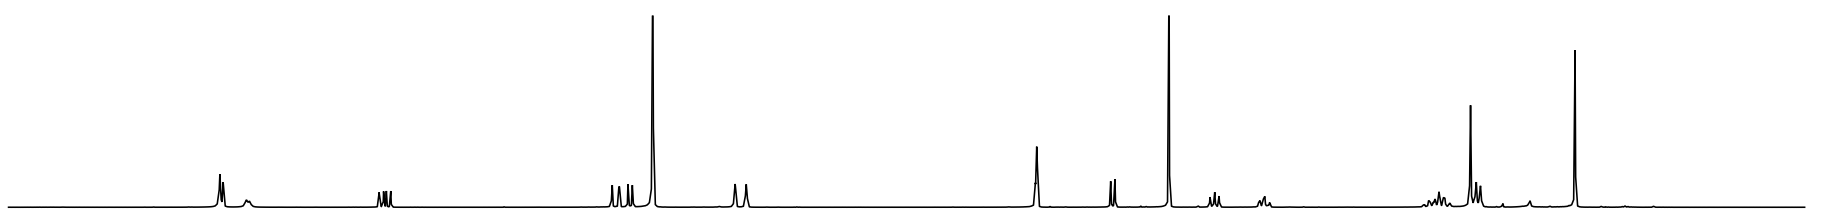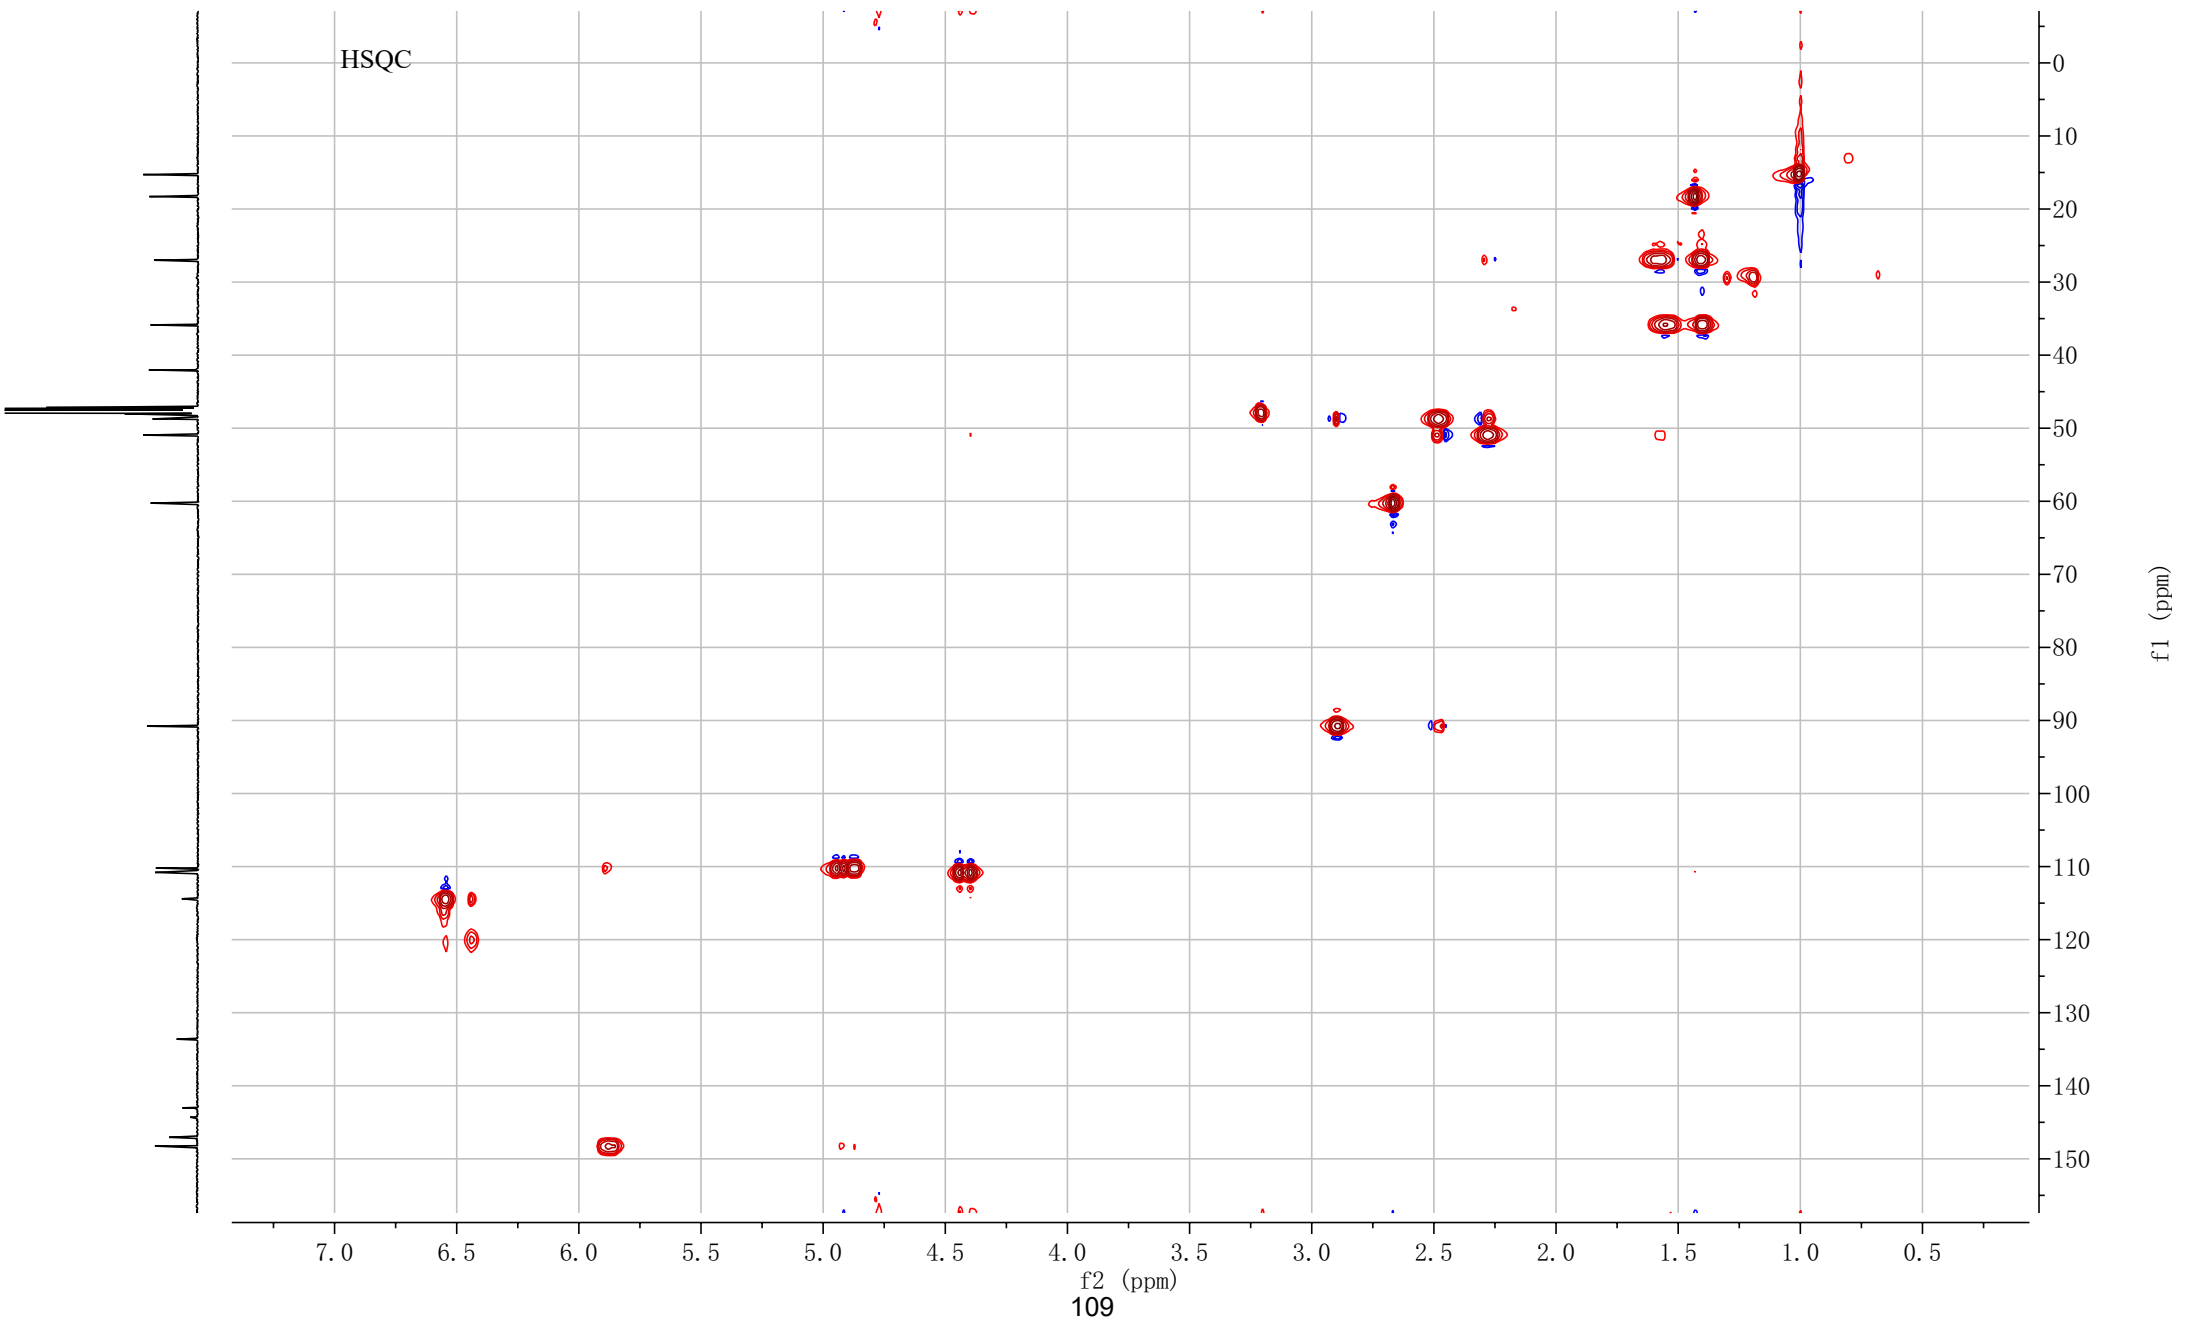

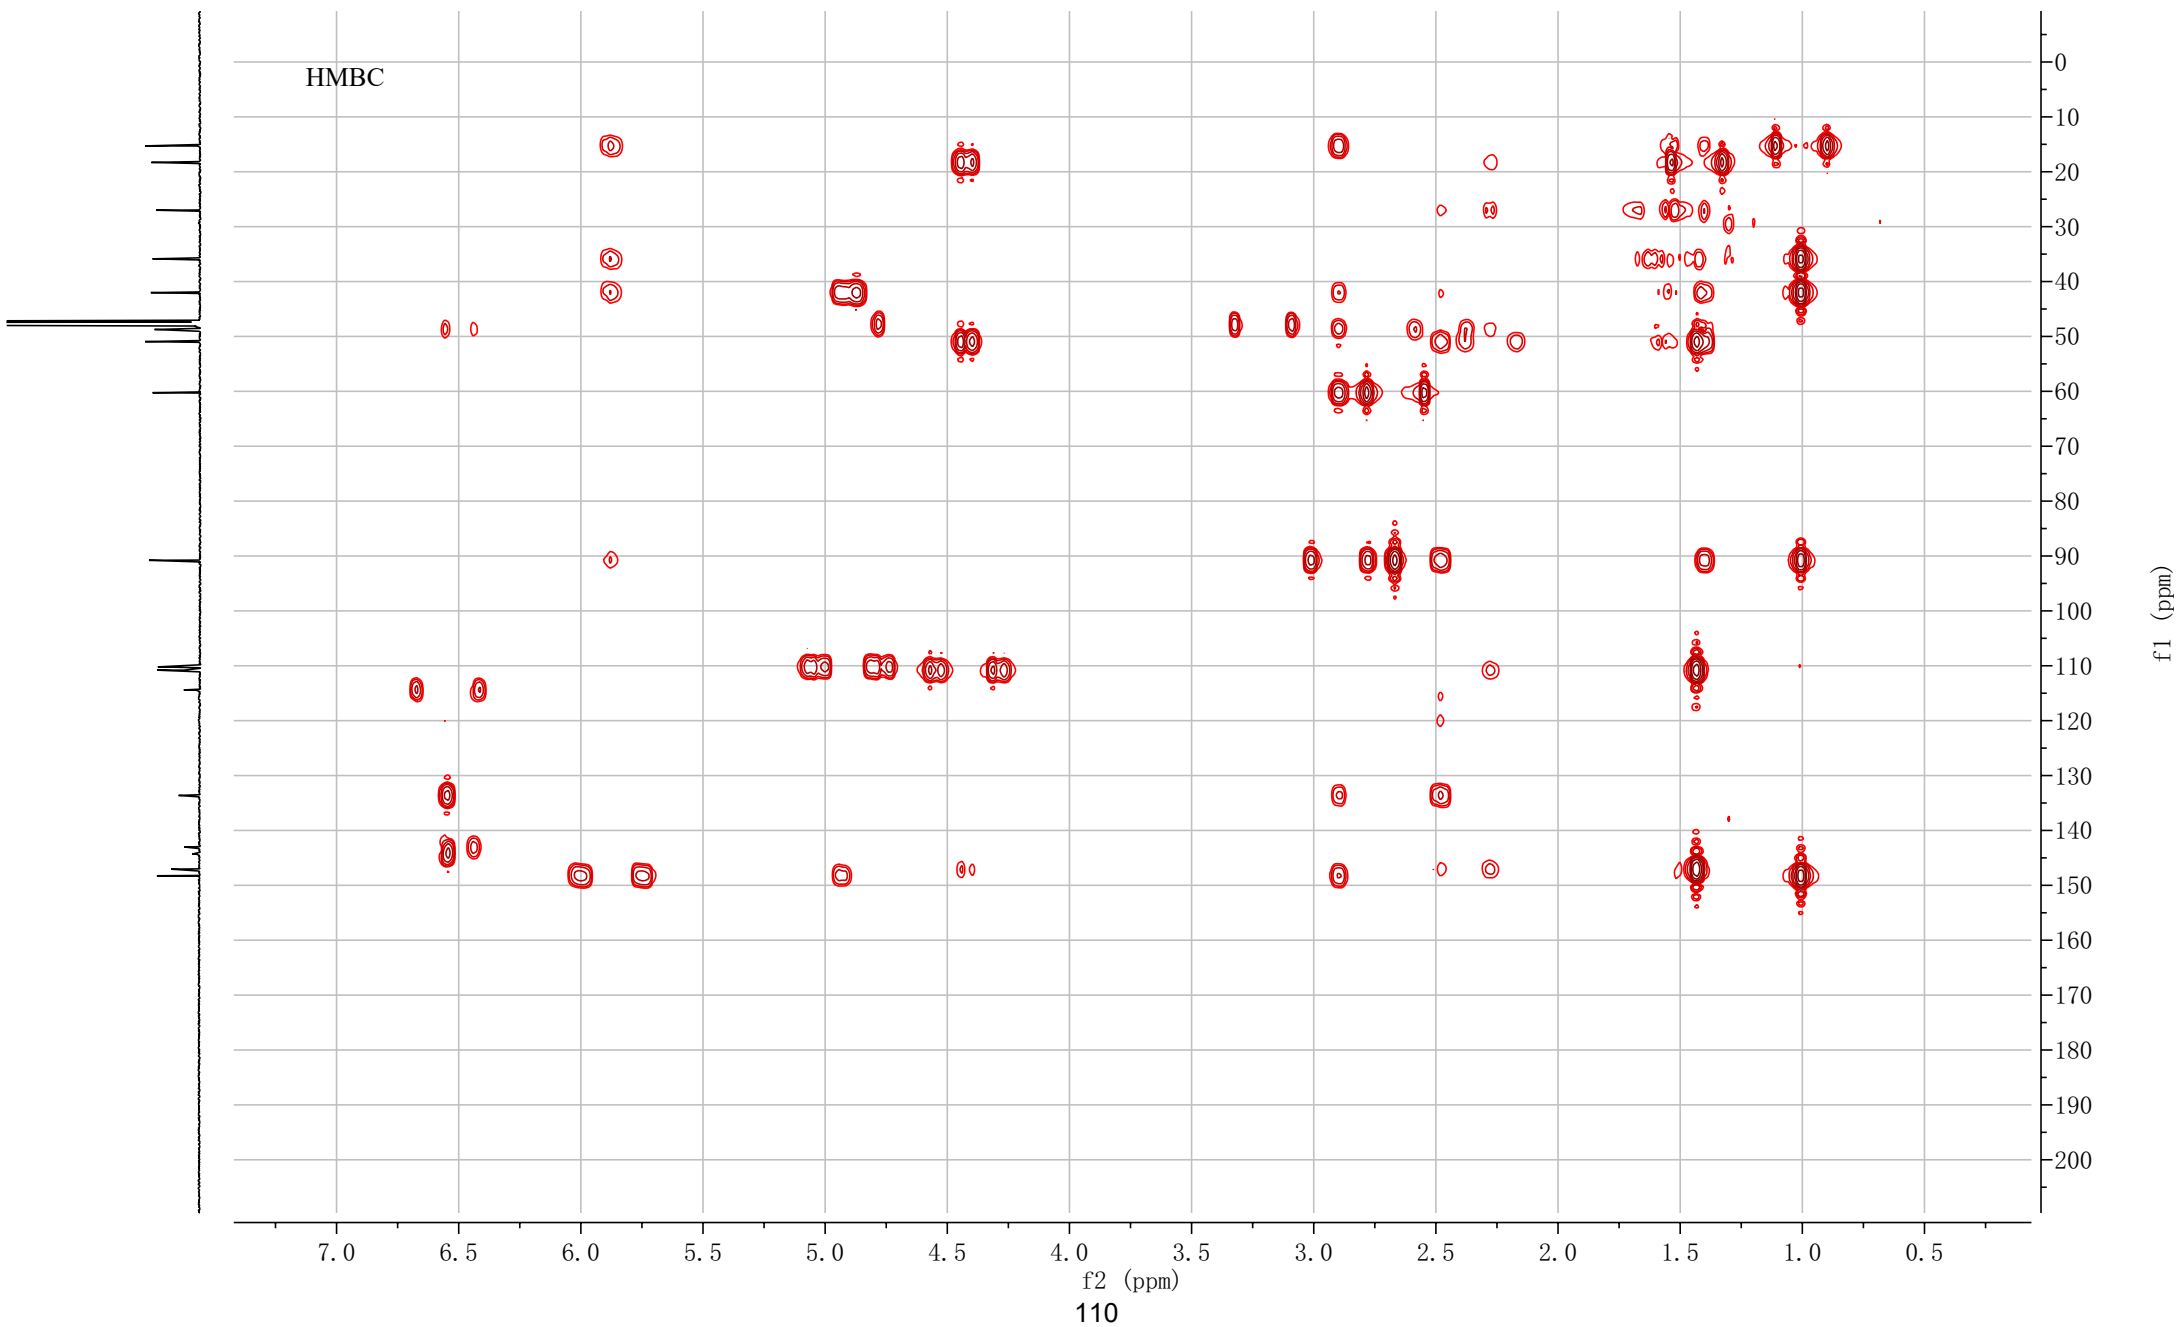

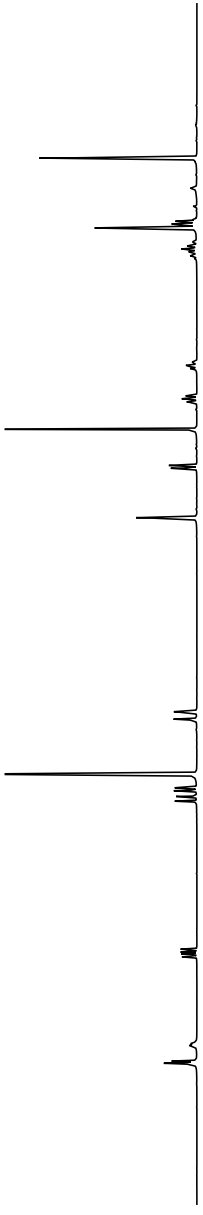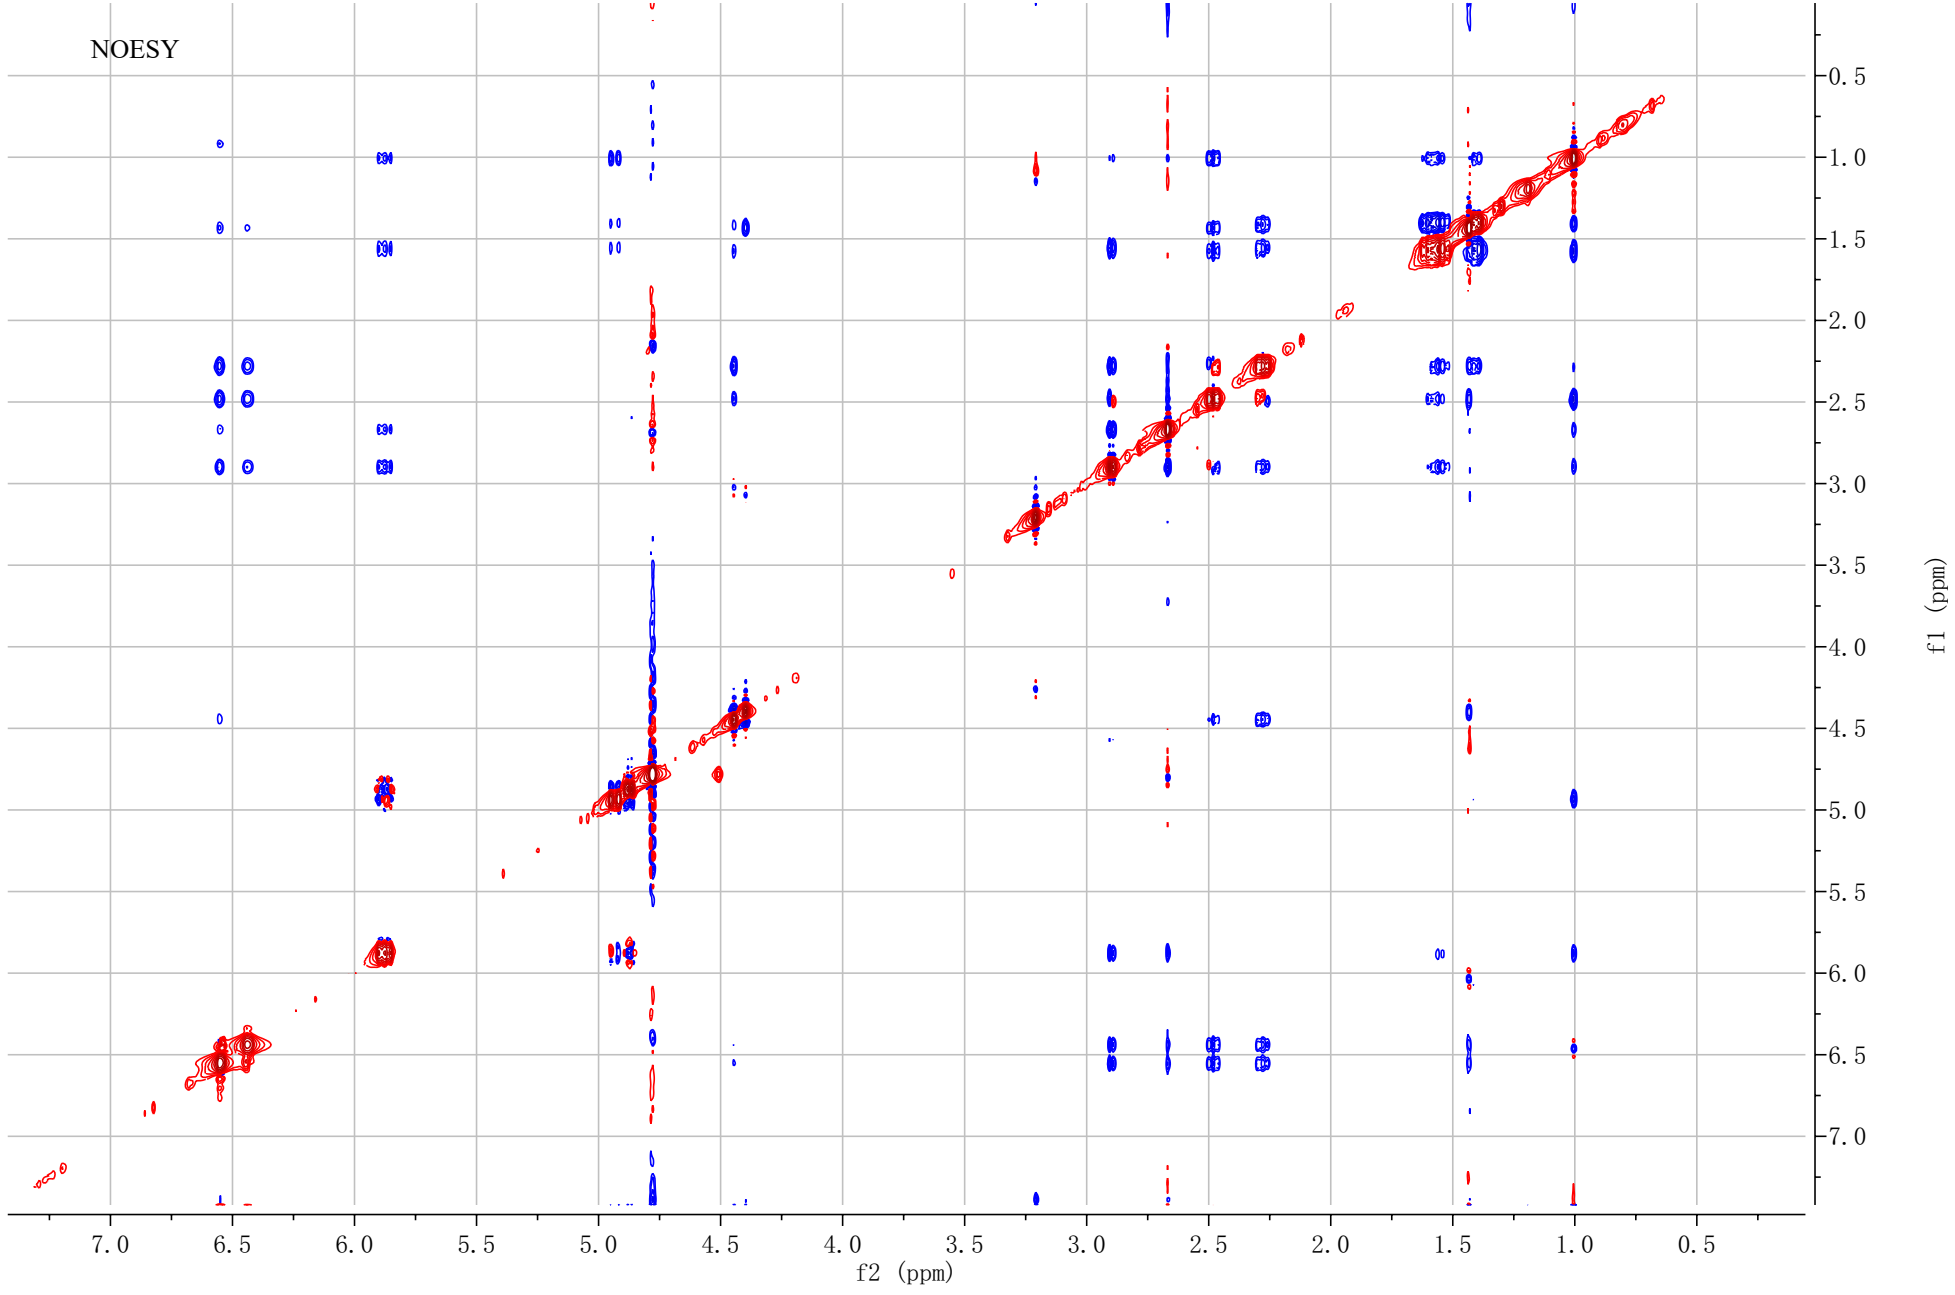

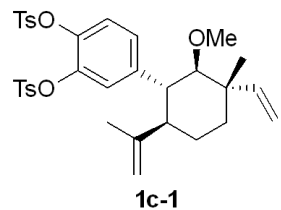

<sup>1</sup>H NMR (600 MHz, CDCl<sub>3</sub>)

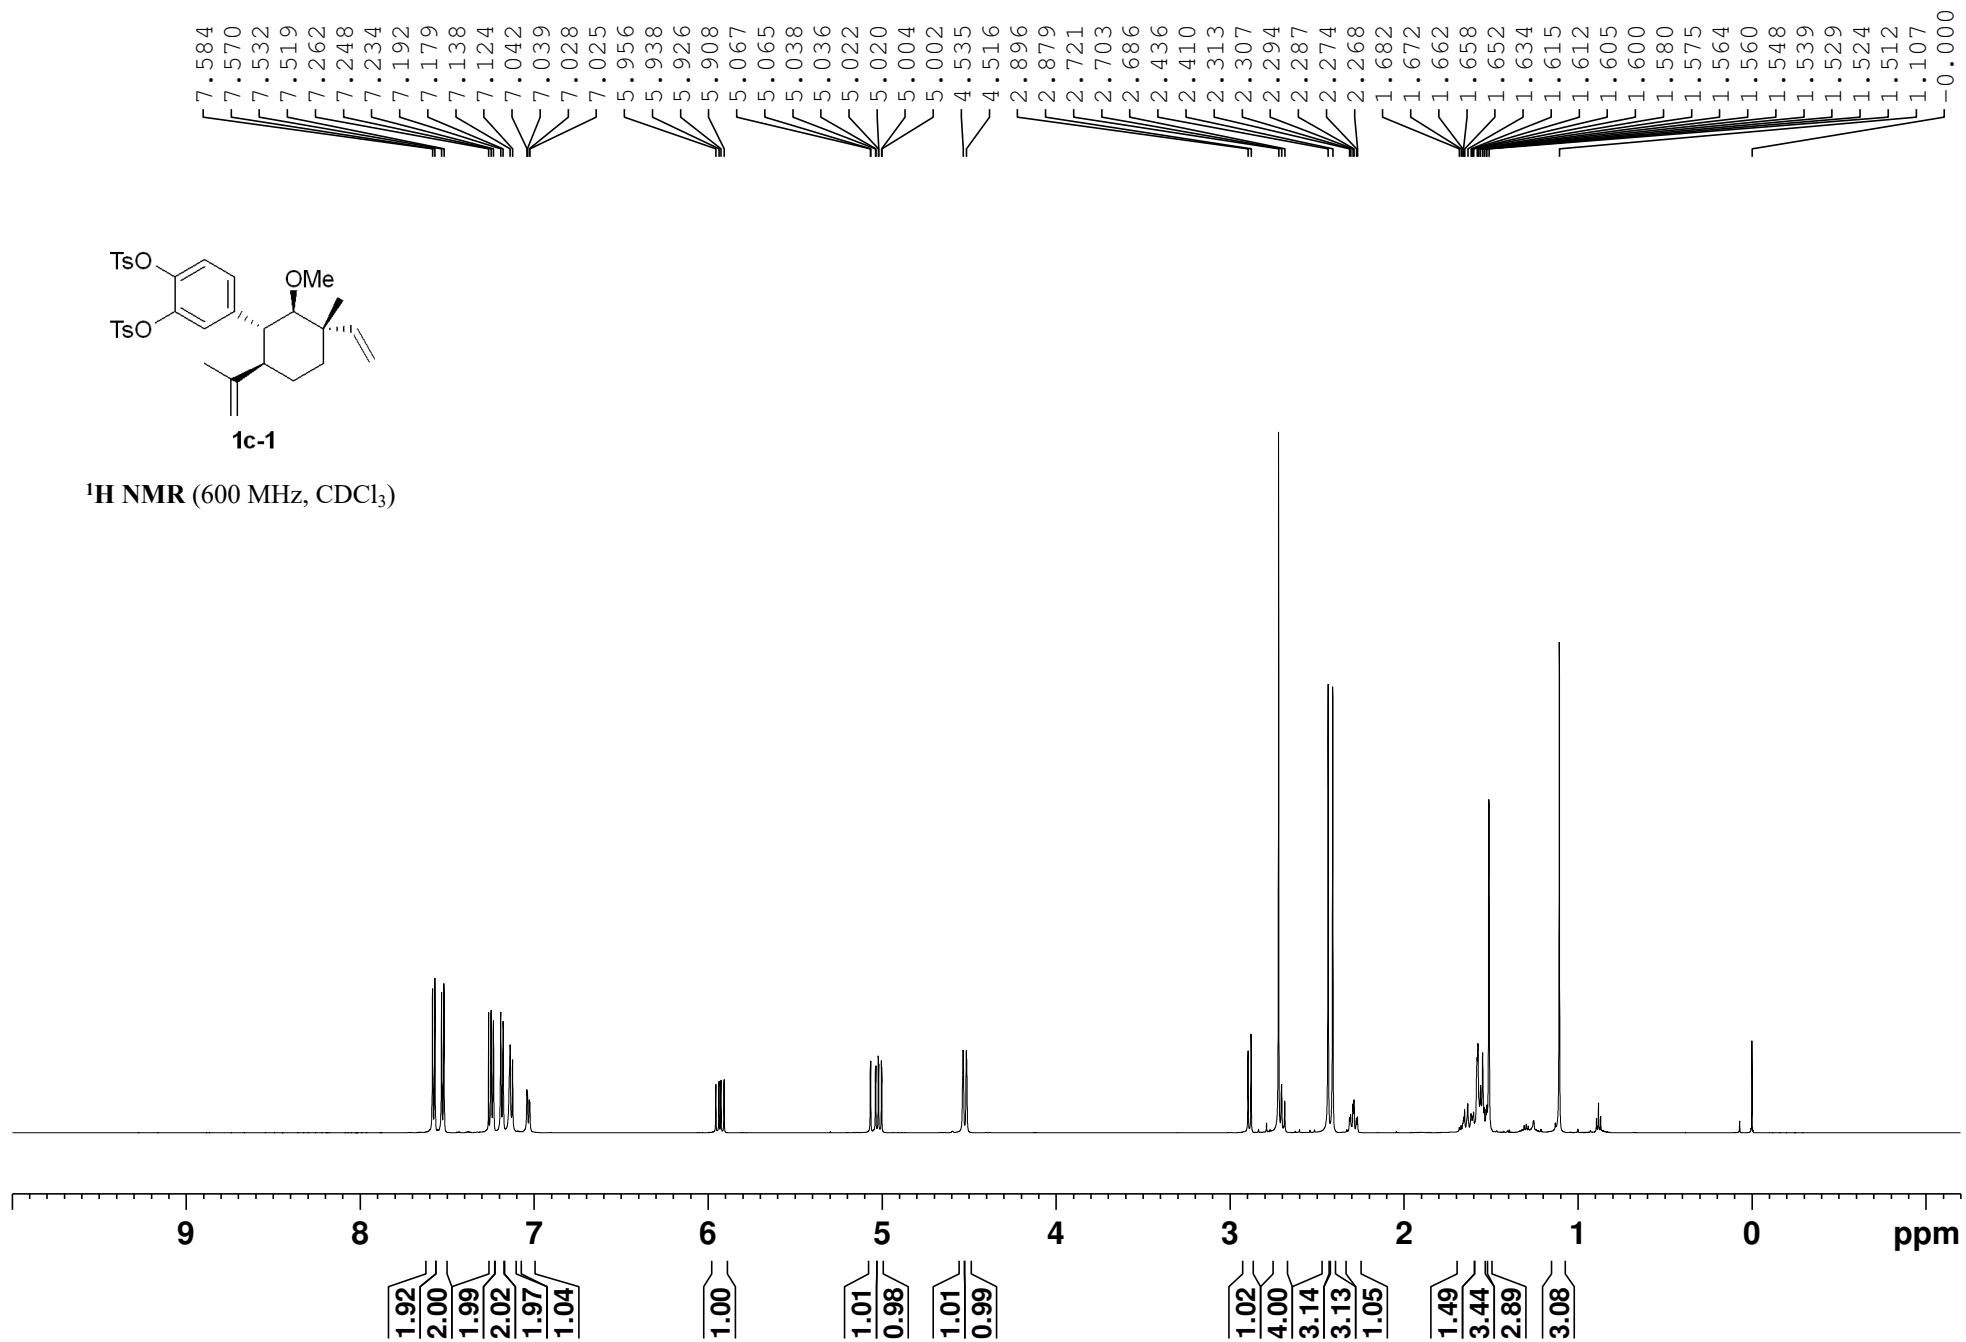

<sup>13</sup>C NMR (150 MHz, CDCl<sub>3</sub>)

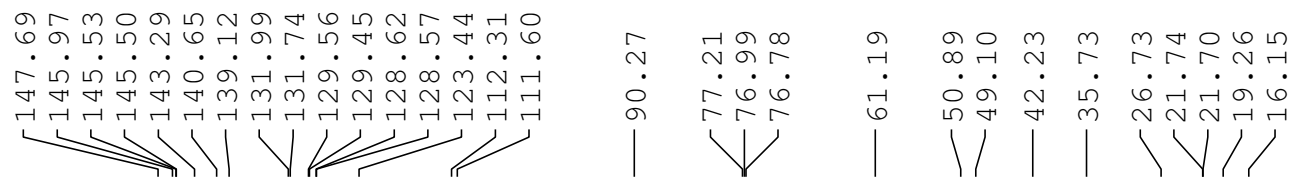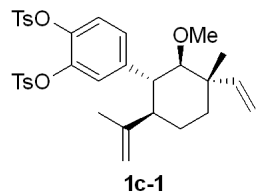

<sup>13</sup>C NMR (150 MHz, CDCl<sub>3</sub>)

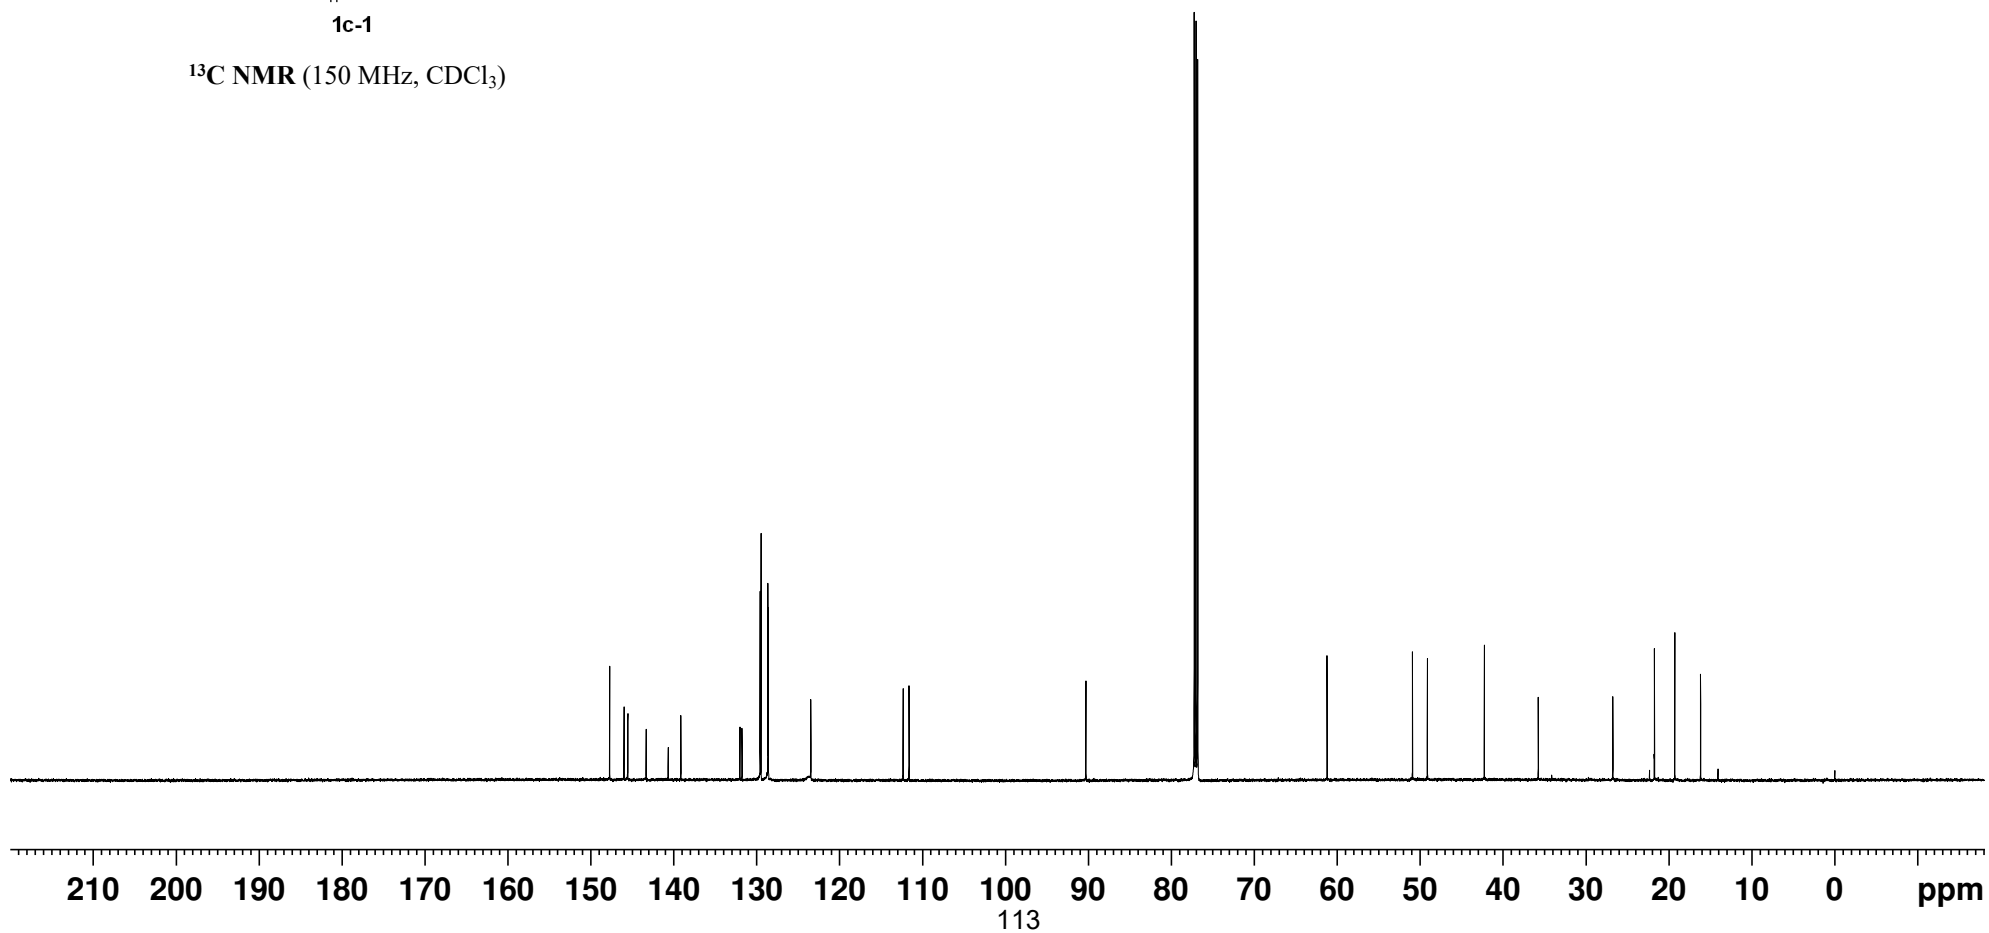

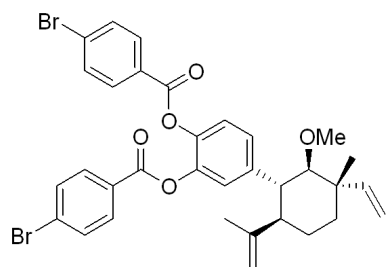

**1c-2**

<sup>1</sup>H NMR (600 MHz, CDCl<sub>3</sub>)

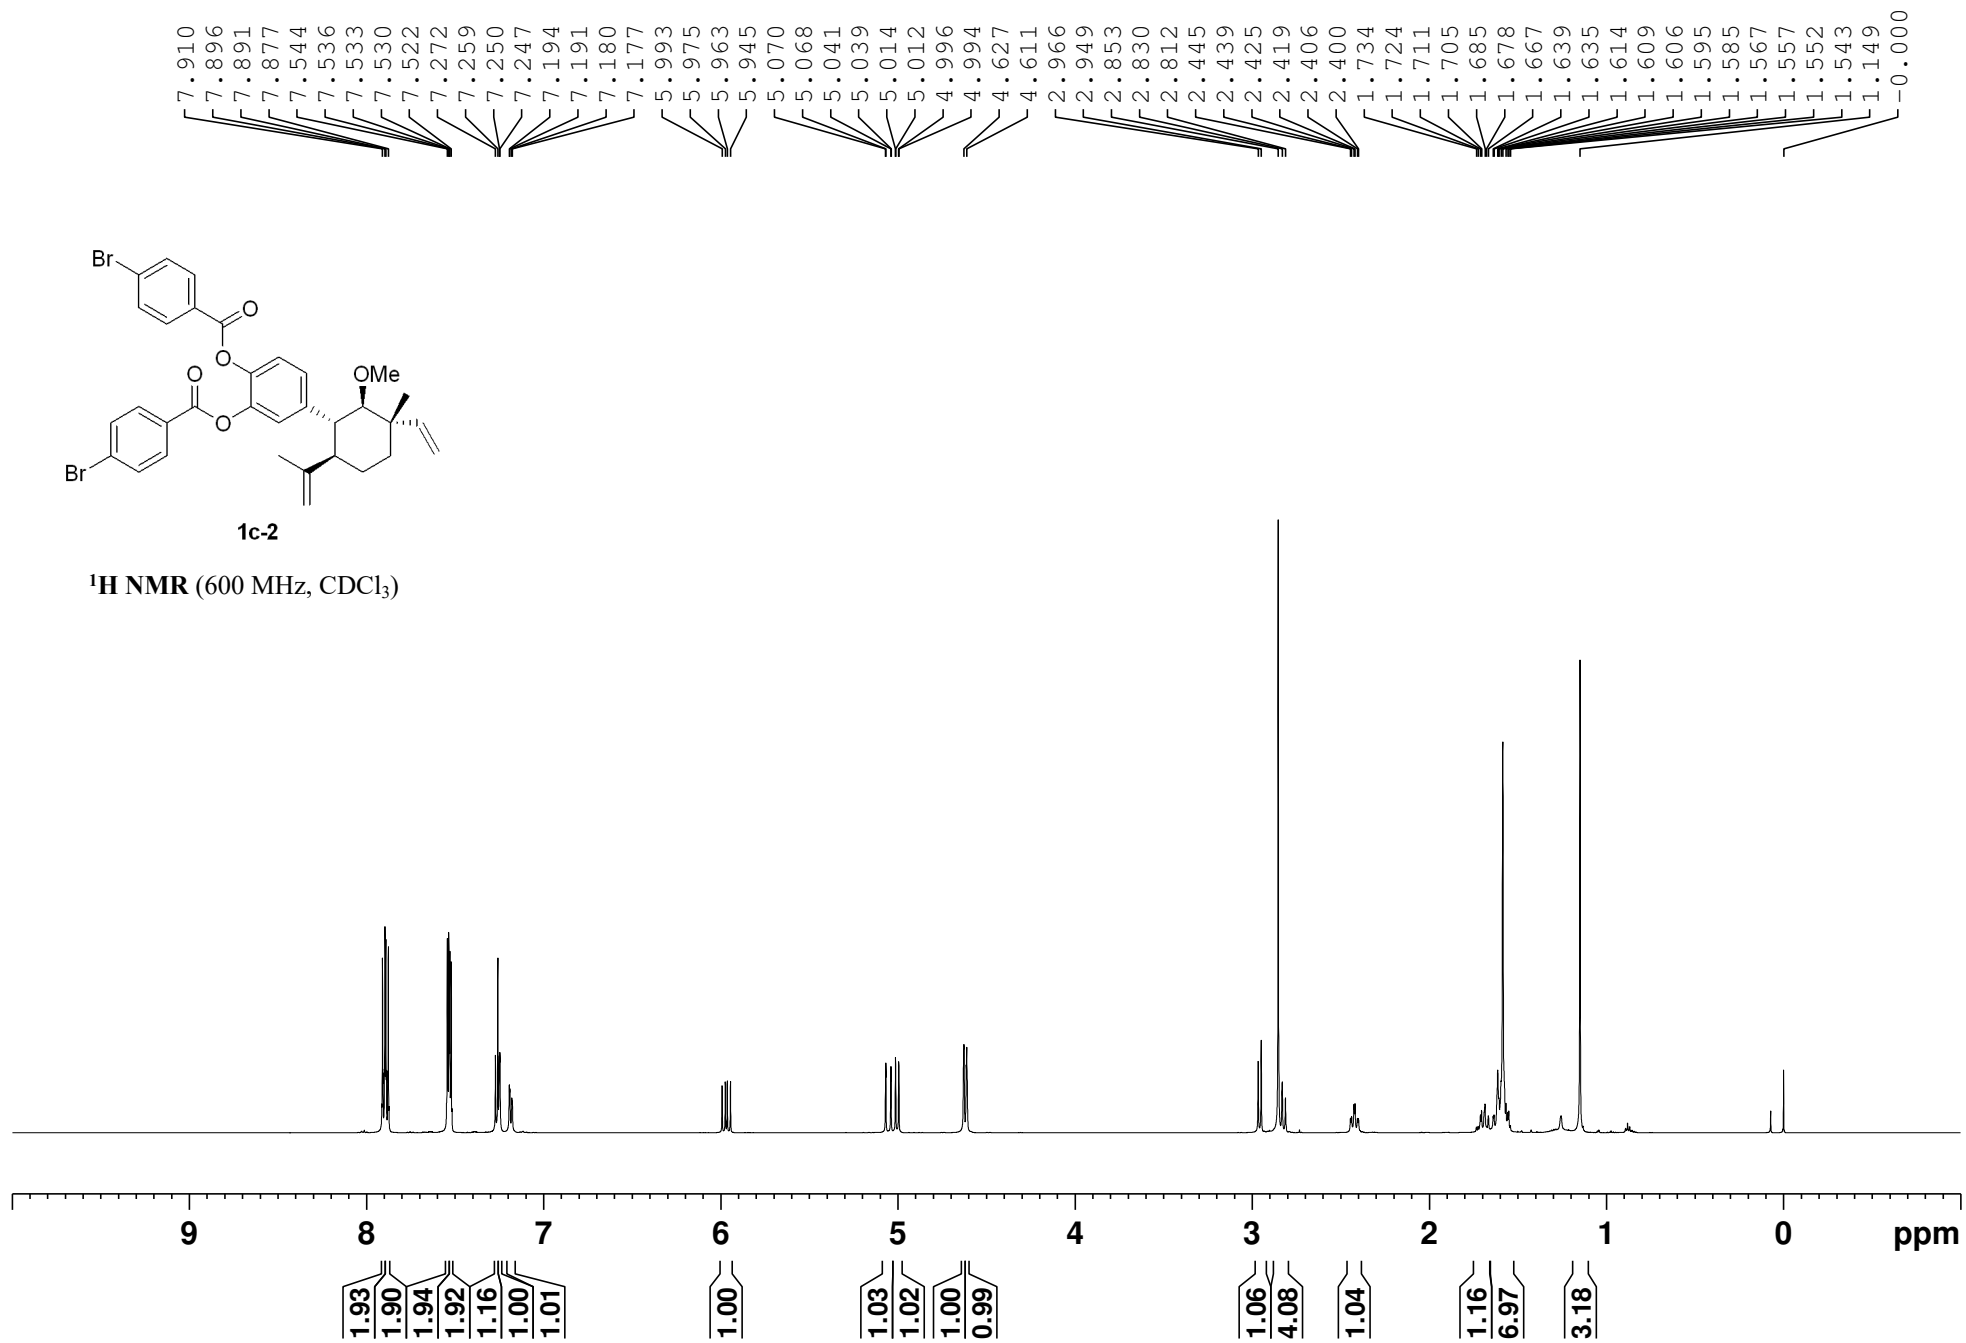

$^{13}\text{C}$  NMR (150 MHz,  $\text{CDCl}_3$ )

163.48  
147.91  
146.23  
141.70  
140.26  
131.93  
131.47  
131.45  
128.97  
127.76  
122.47  
112.42  
111.39

90.60

77.21  
77.00  
76.79

61.44

50.58  
49.13

42.28

35.82

27.09

19.49

16.36

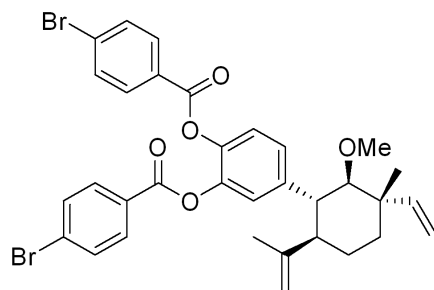

**1c-2**

$^{13}\text{C}$  NMR (150 MHz,  $\text{CDCl}_3$ )

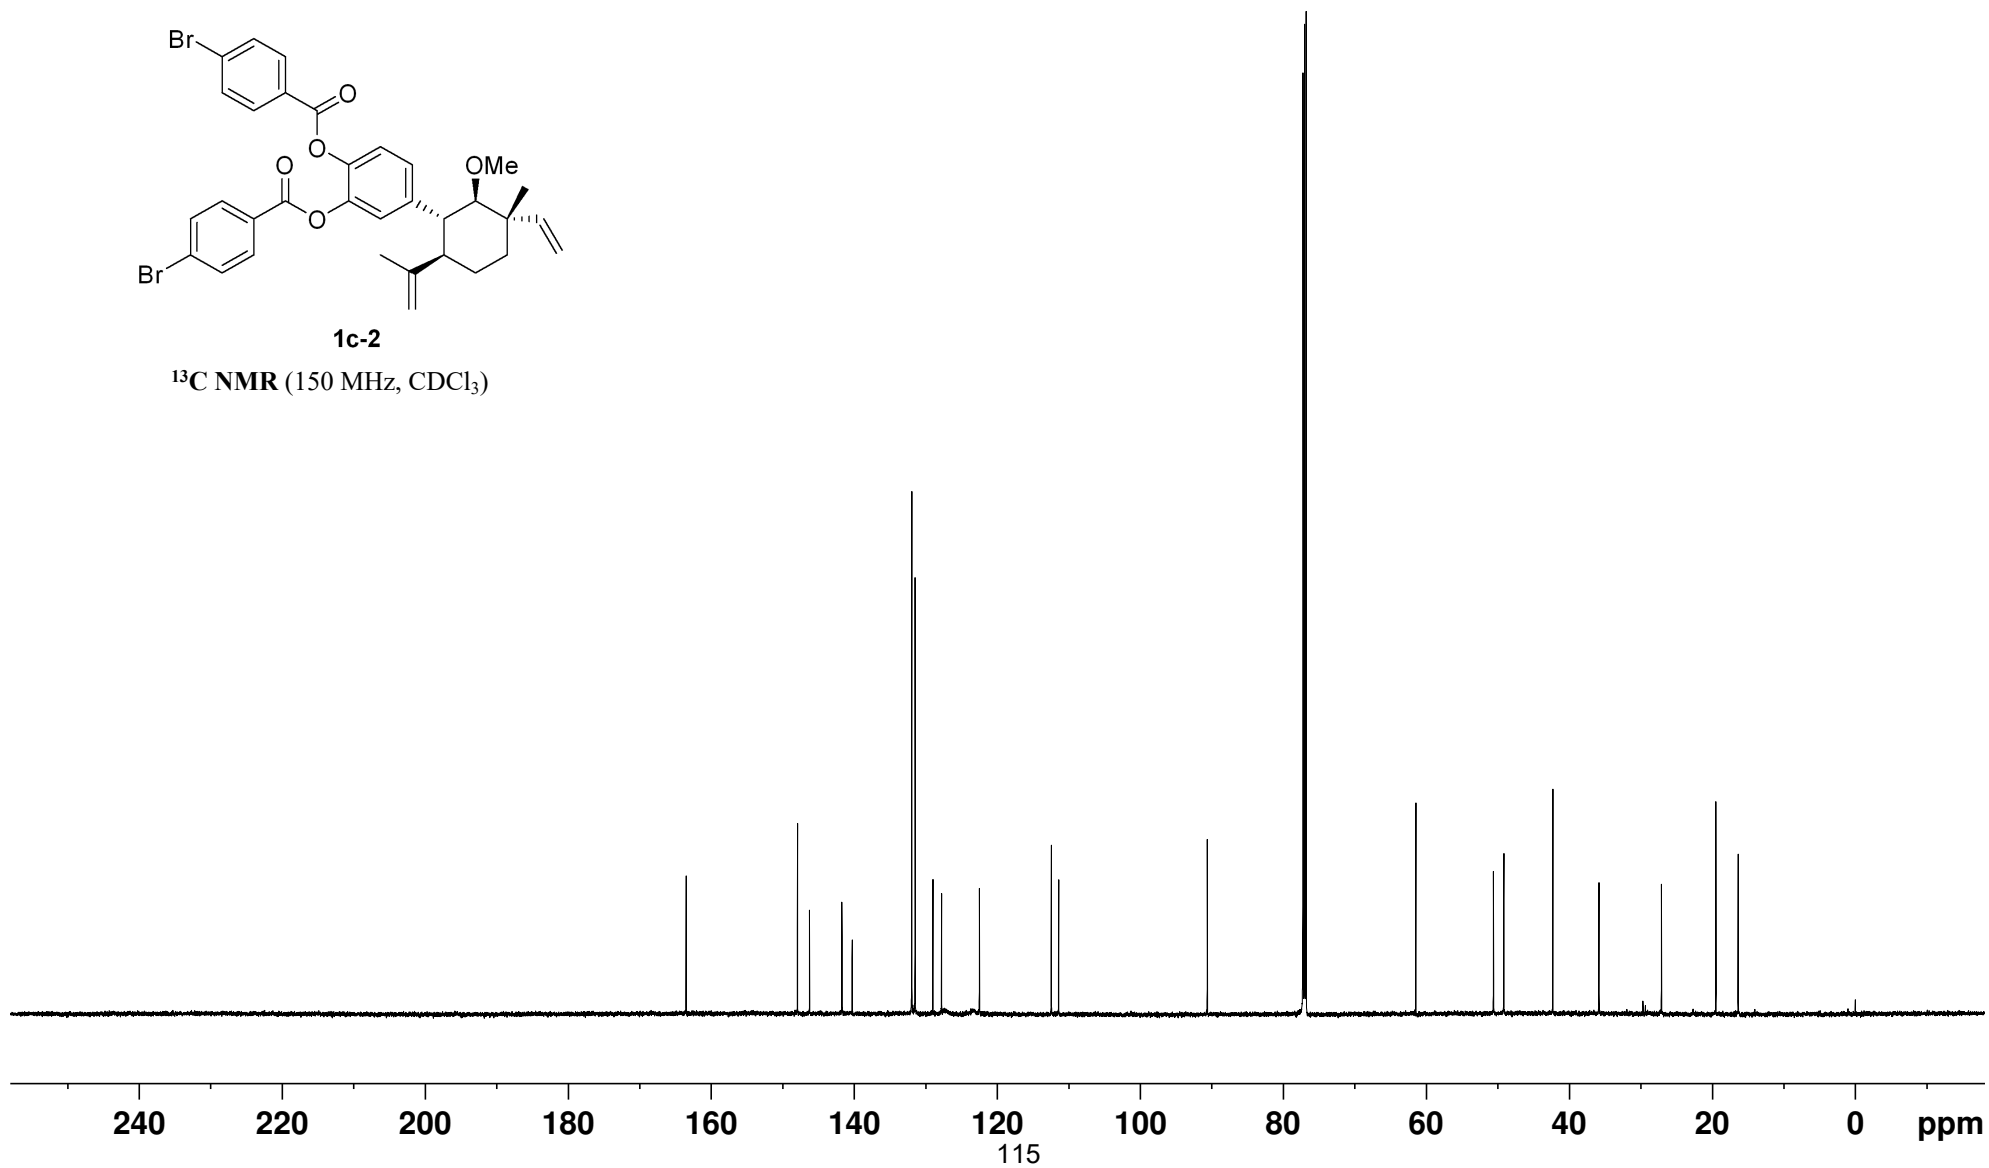

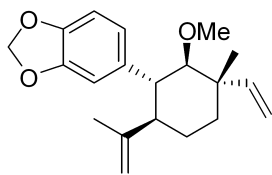

**1c-3**

<sup>1</sup>H NMR (600 MHz, CDCl<sub>3</sub>)

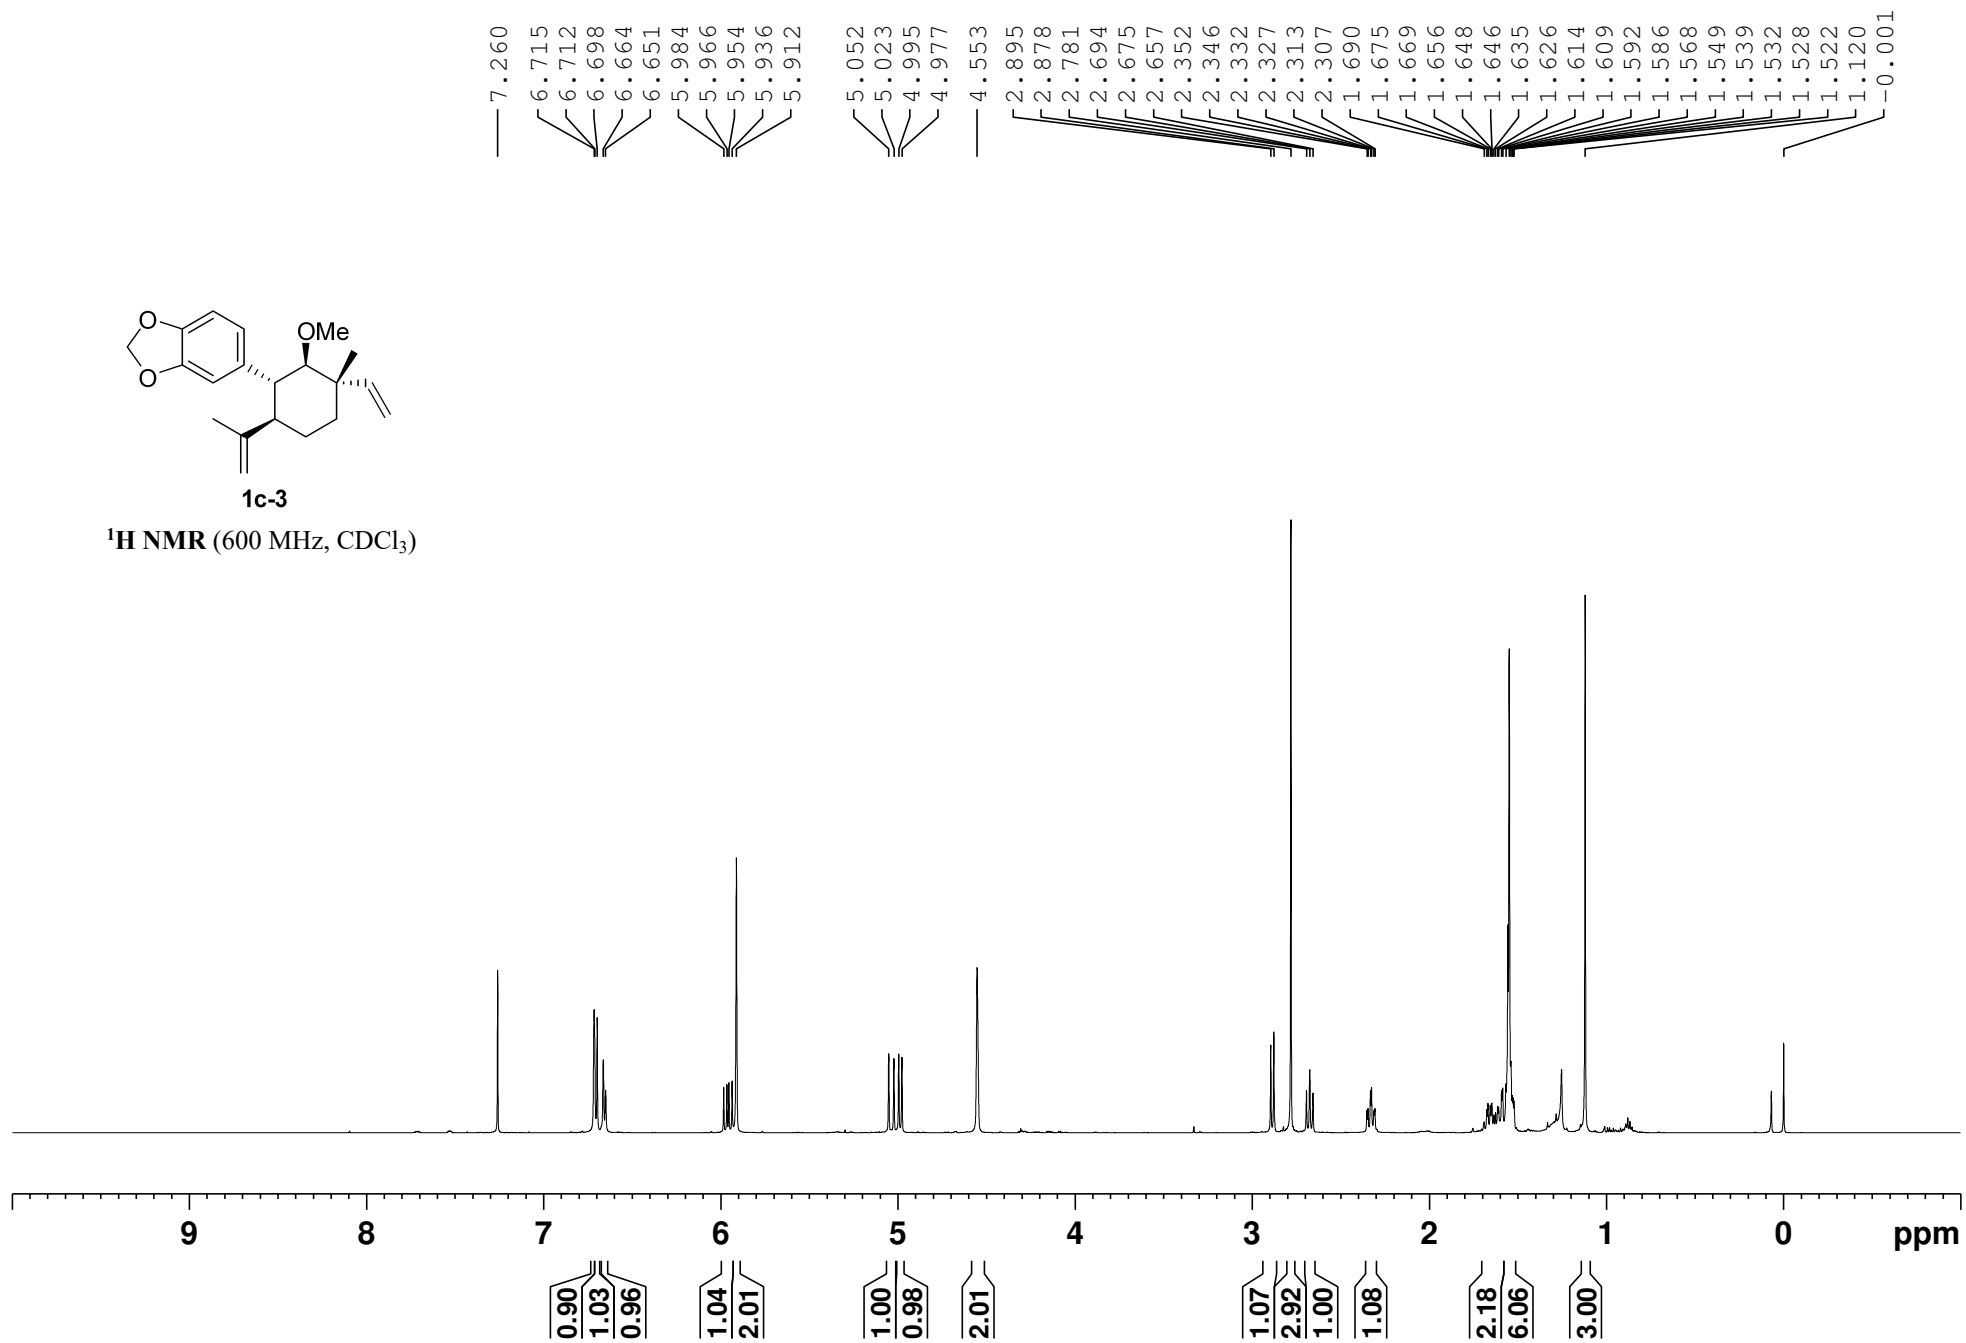



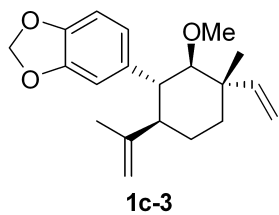

<sup>13</sup>C NMR (150 MHz, CDCl<sub>3</sub>)

148.22  
147.20  
146.89  
145.62  
136.21  
122.13  
111.83  
111.15  
108.72  
107.74  
100.67  
90.66  
77.21  
77.00  
76.78  
61.27  
50.97  
49.15  
42.28  
35.89  
27.17  
19.30  
16.38

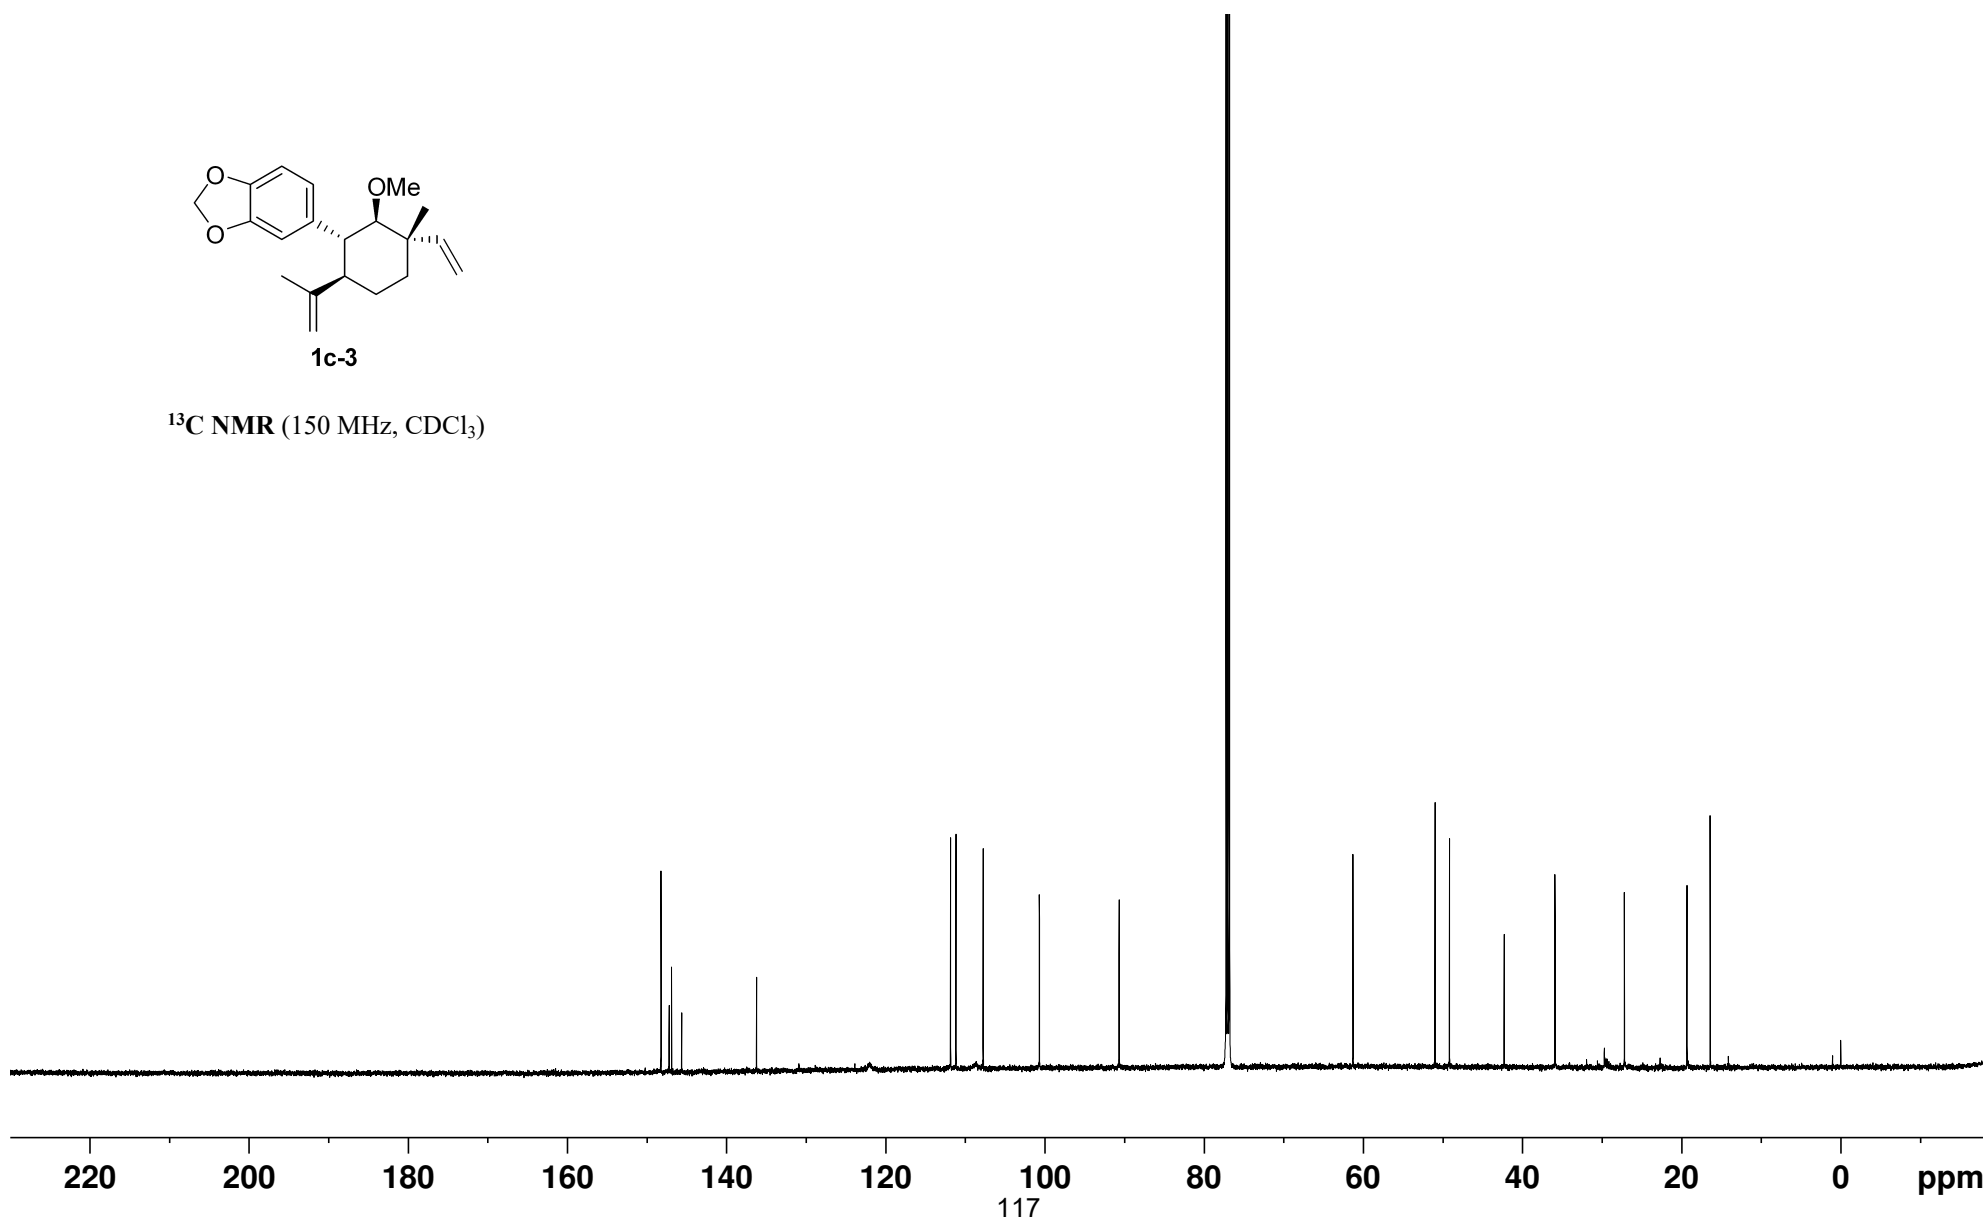

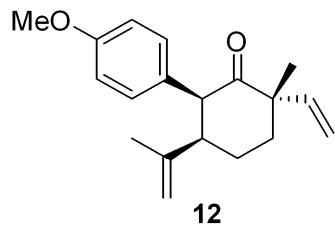

<sup>1</sup>H NMR (600 MHz, CDCl<sub>3</sub>)

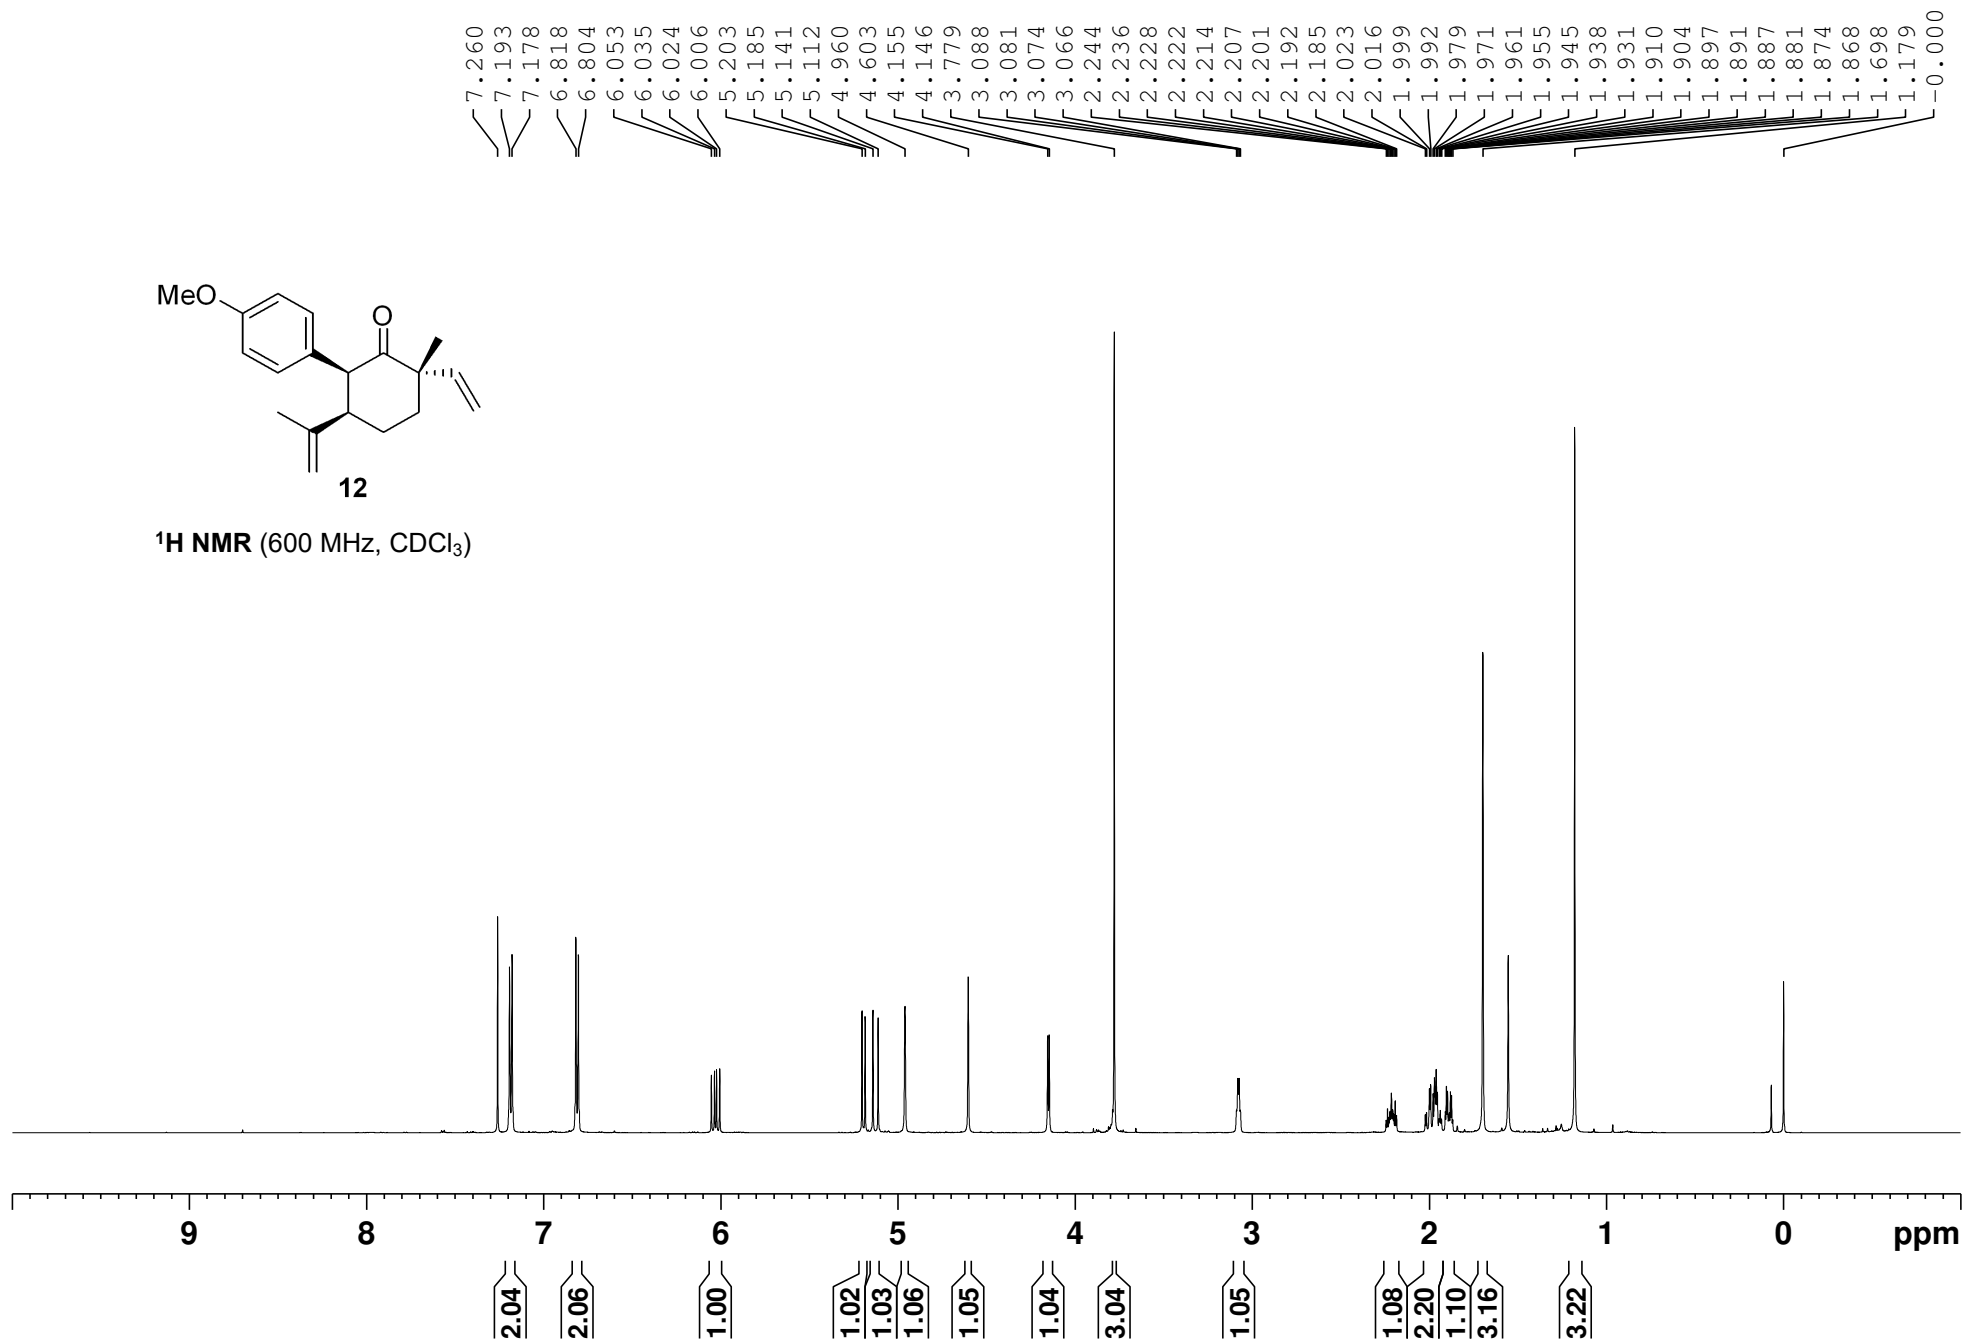

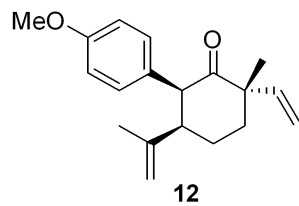

<sup>13</sup>C NMR (150 MHz, CDCl<sub>3</sub>)

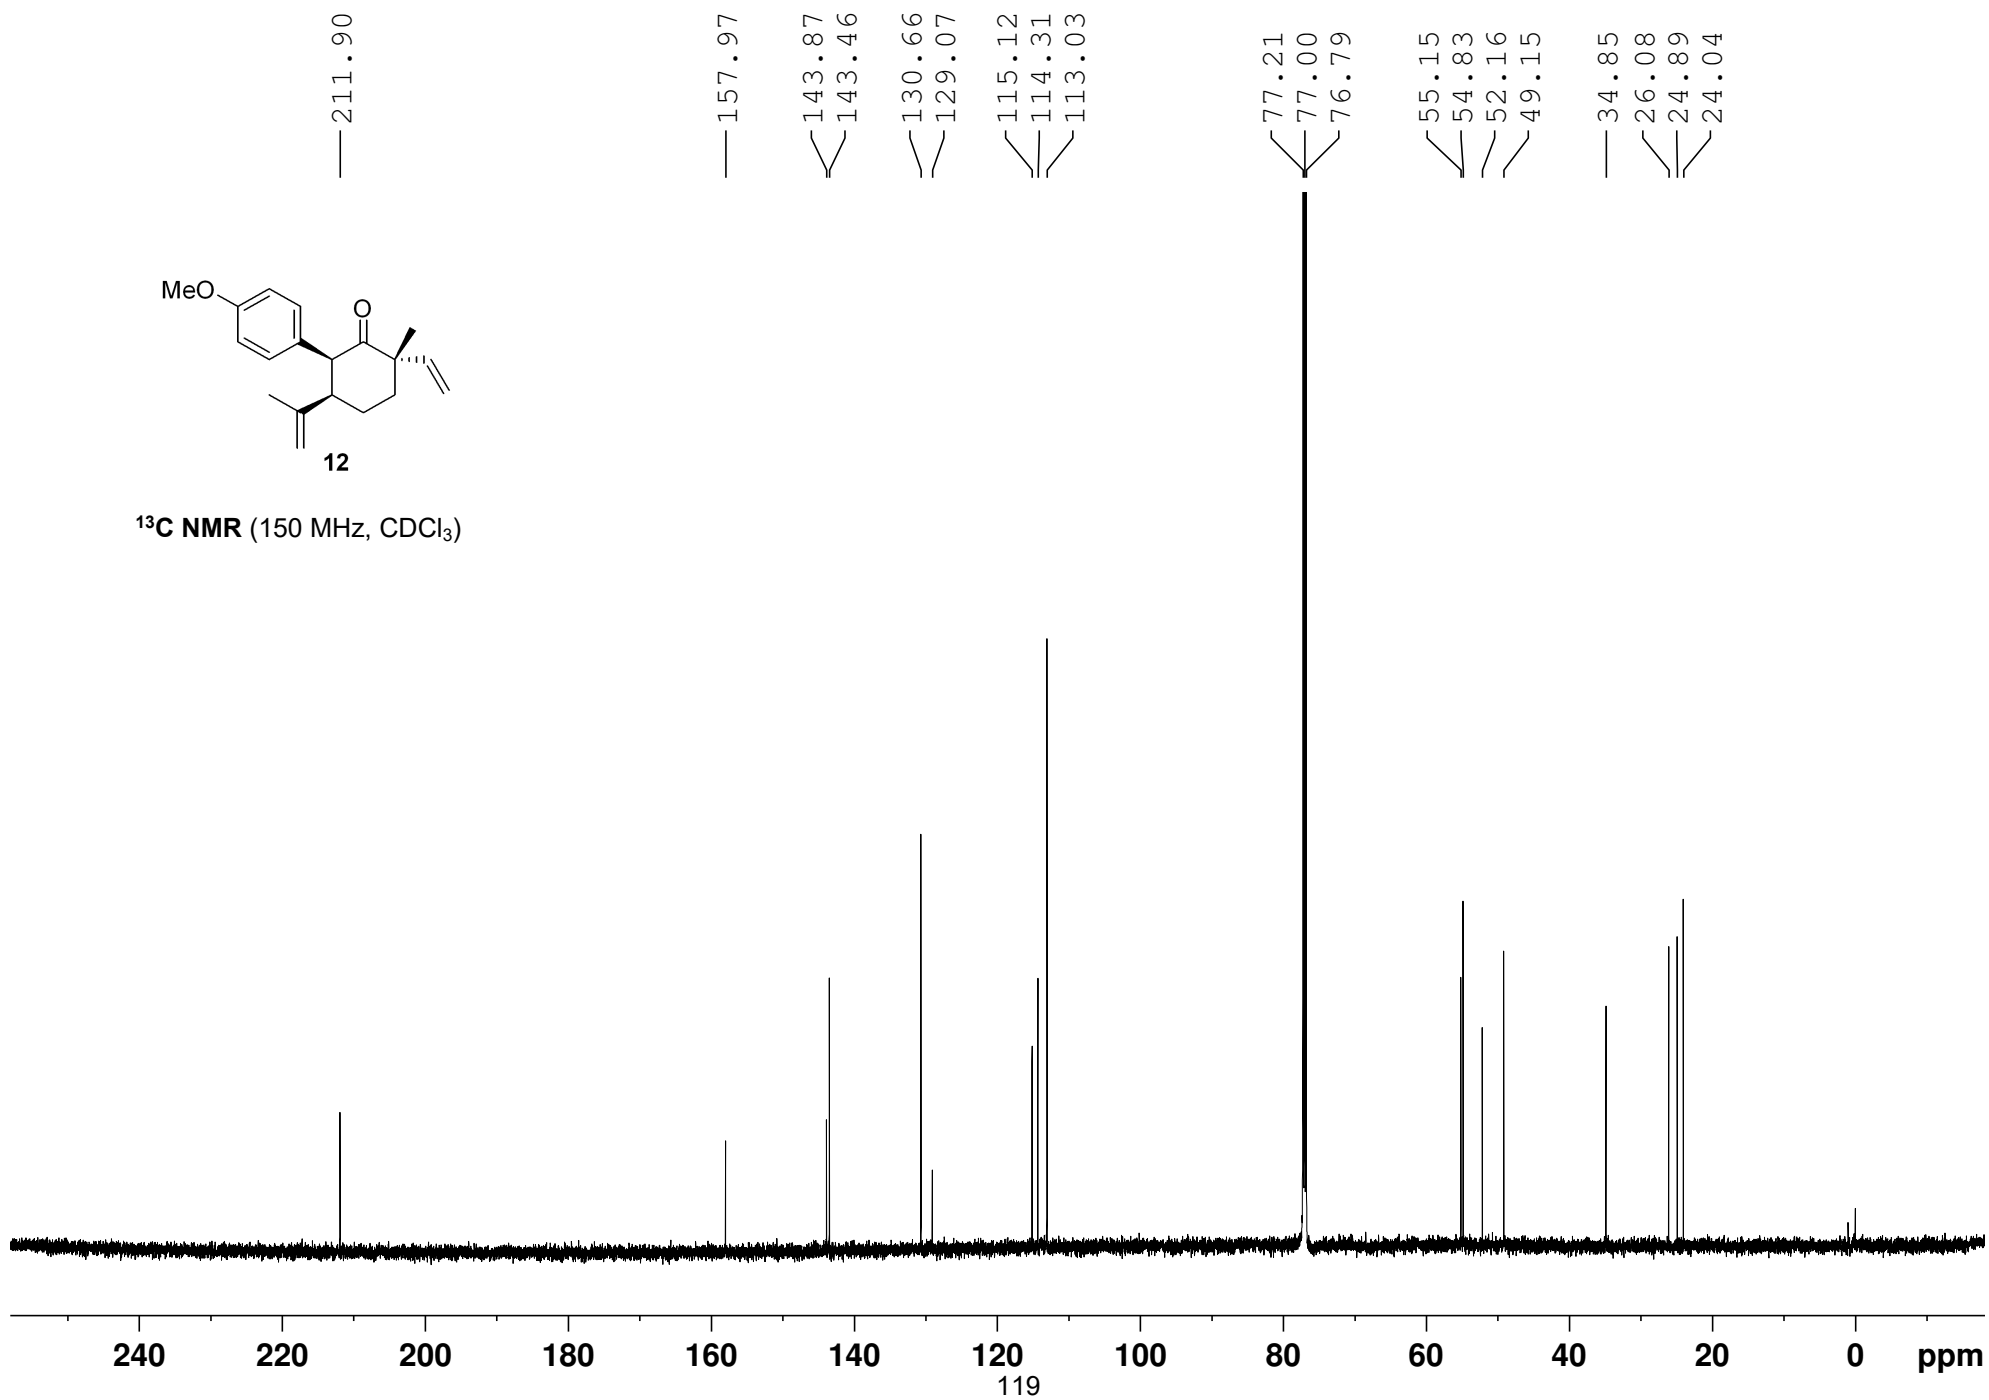

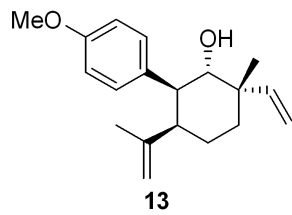

<sup>1</sup>H NMR (400 MHz, CDCl<sub>3</sub>)

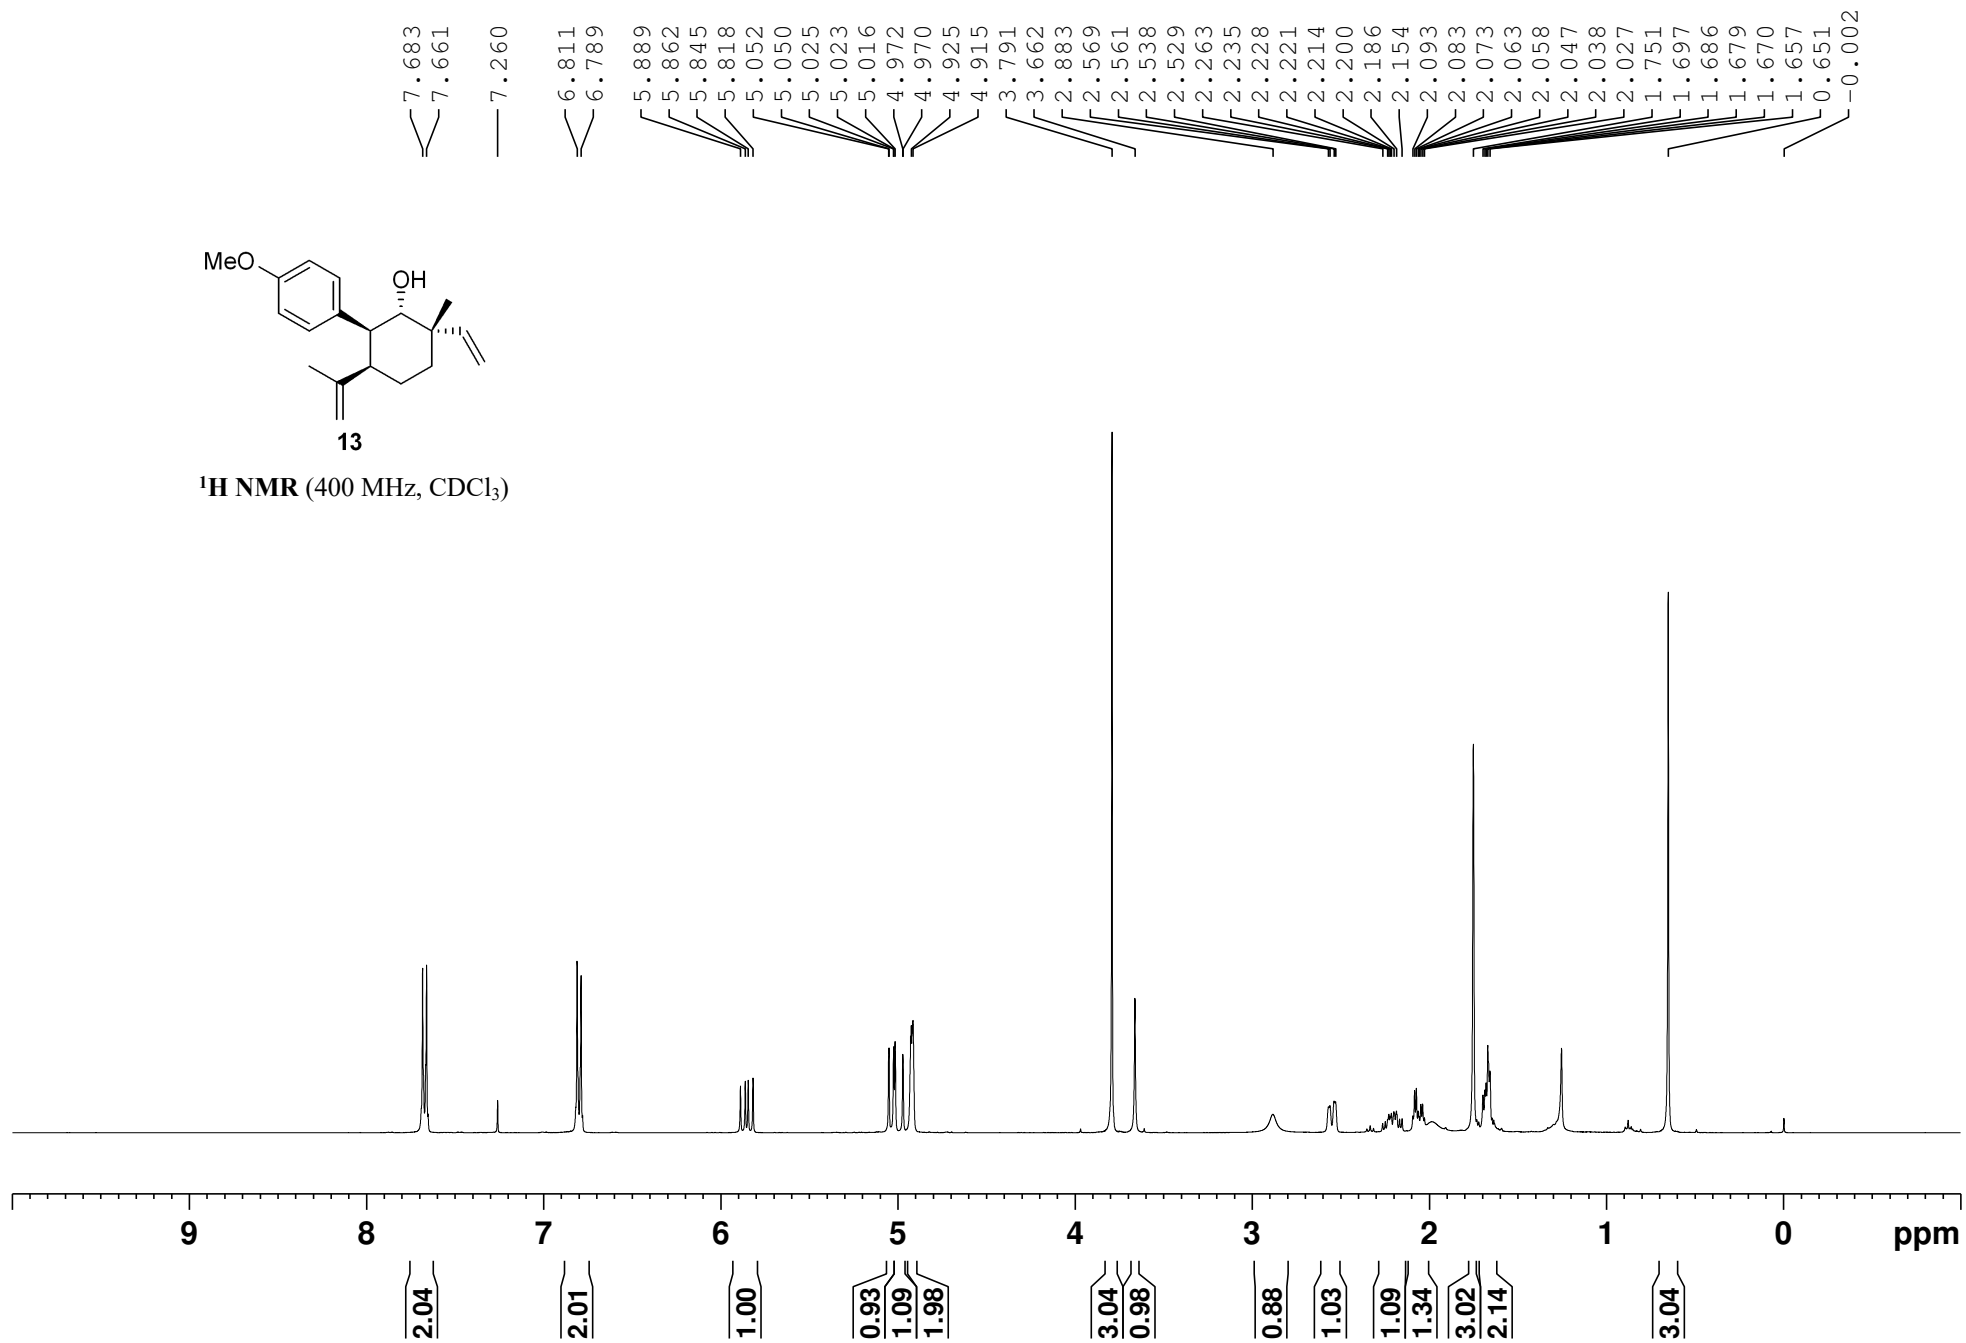

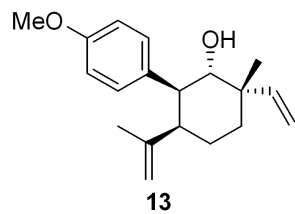

<sup>13</sup>C NMR (100 MHz, CDCl<sub>3</sub>)

— 158.46  
— 148.22  
— 146.05  
— 132.82  
— 130.32  
— 113.78  
— 112.33  
— 112.25  
— 83.43  
— 77.61  
— 77.32  
— 77.00  
— 76.68  
— 55.04  
— 53.82  
— 42.41  
— 36.10  
— 25.38  
— 24.98  
— 15.49

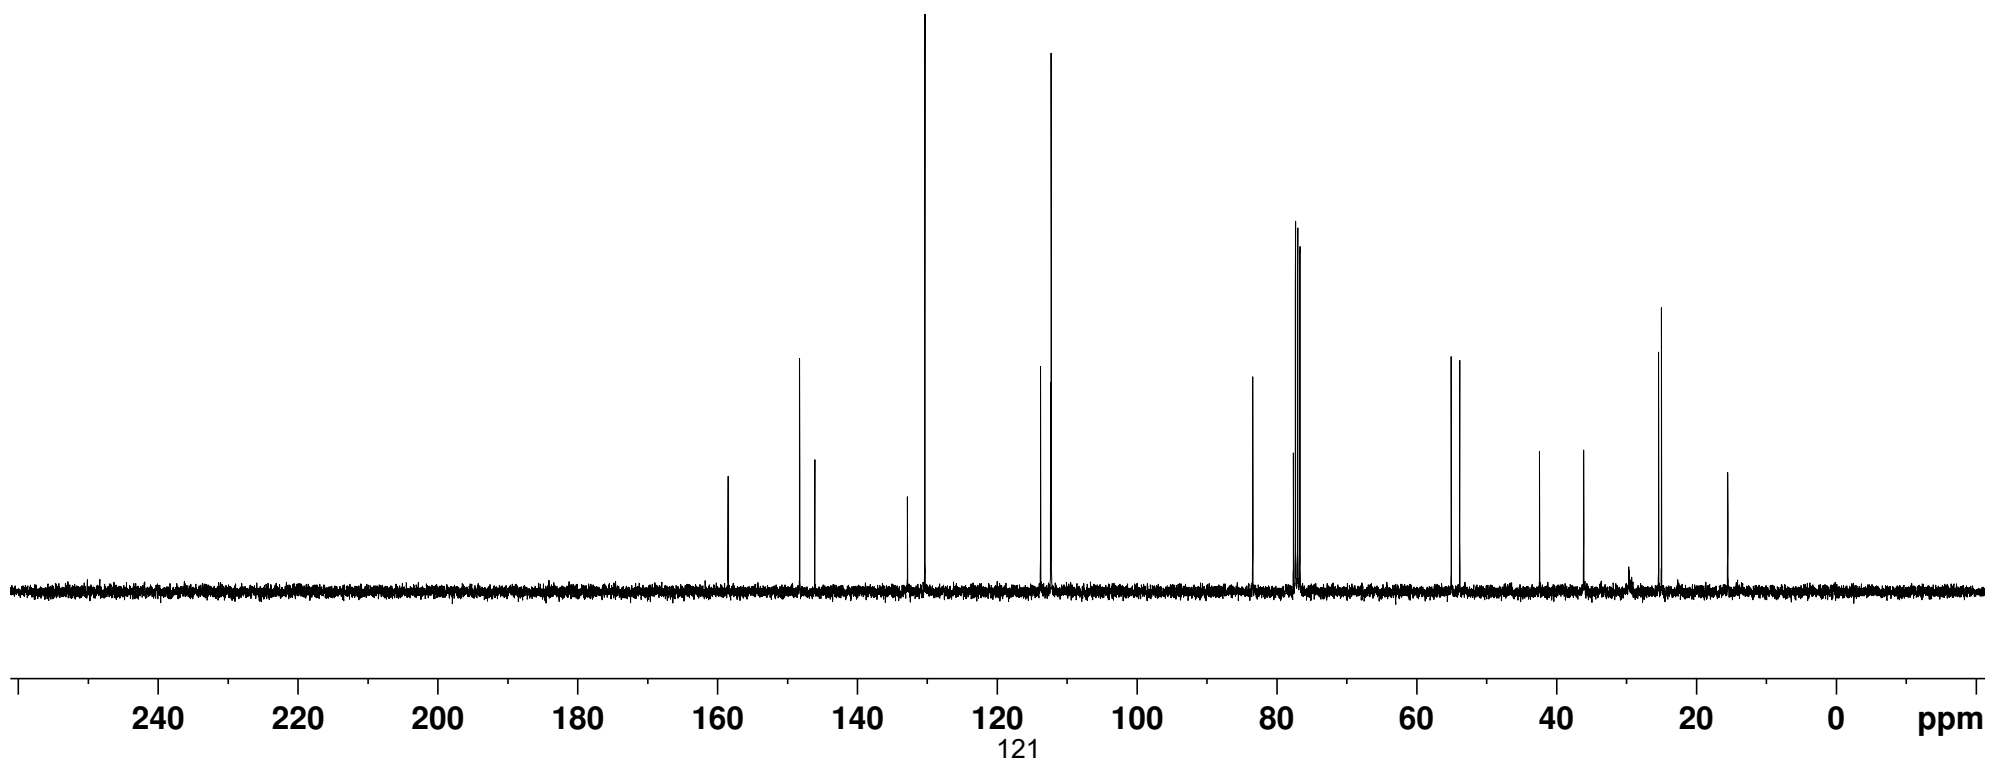

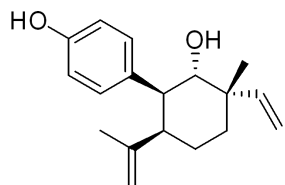

7 $\beta$ ,8 $\alpha$ -hydroxy-12  $\beta$ -  
Psoracorylifol F (1d)

$^1\text{H}$  NMR (600 MHz, acetone- $d_6$ )

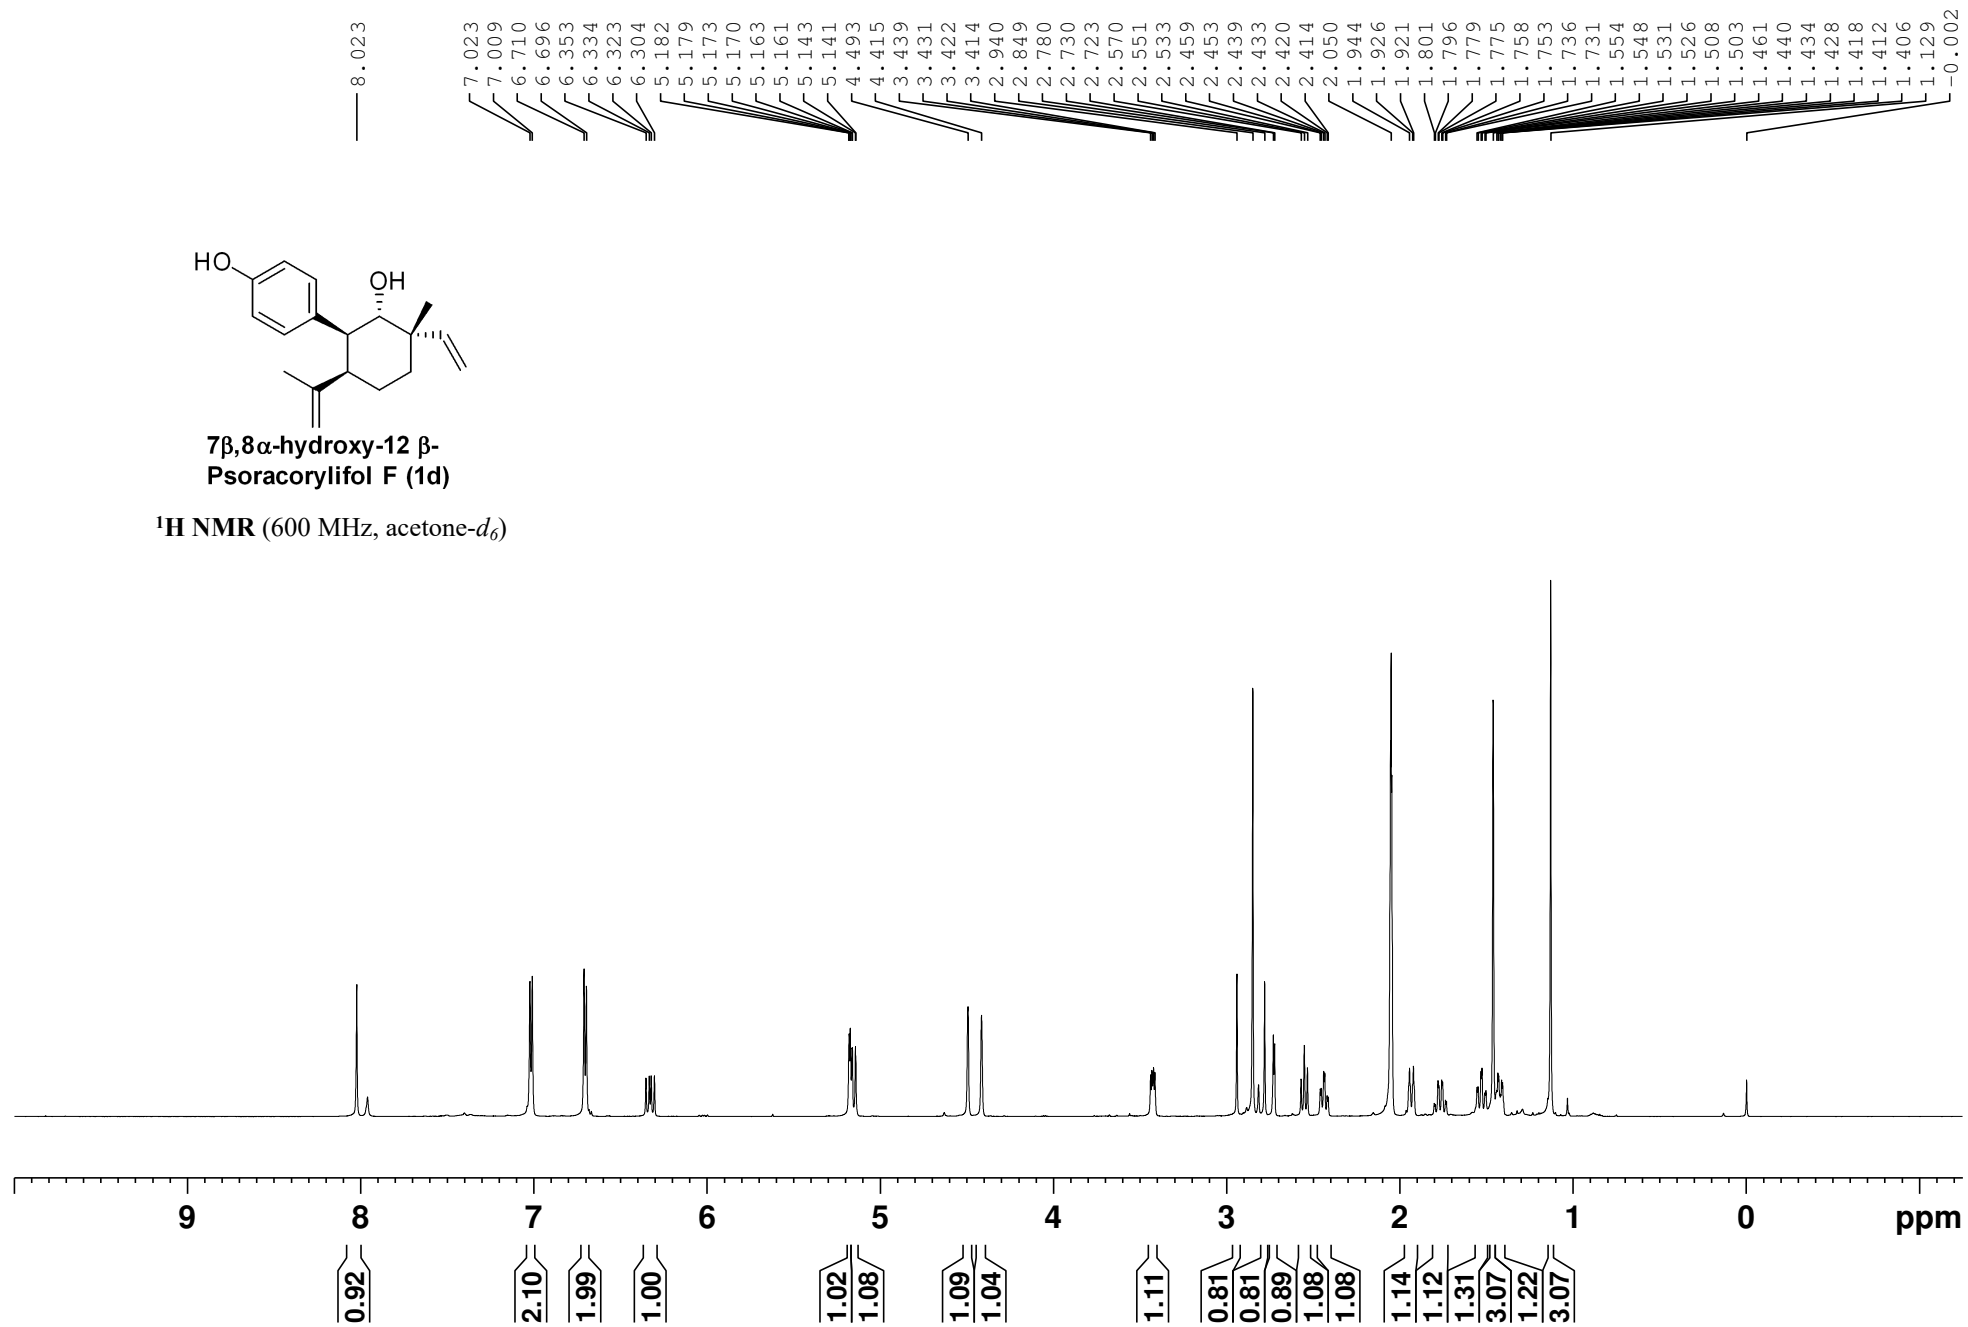

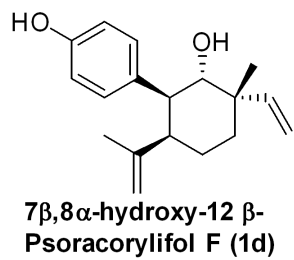

$^{13}\text{C}$  NMR (150 MHz, acetone- $d_6$ )

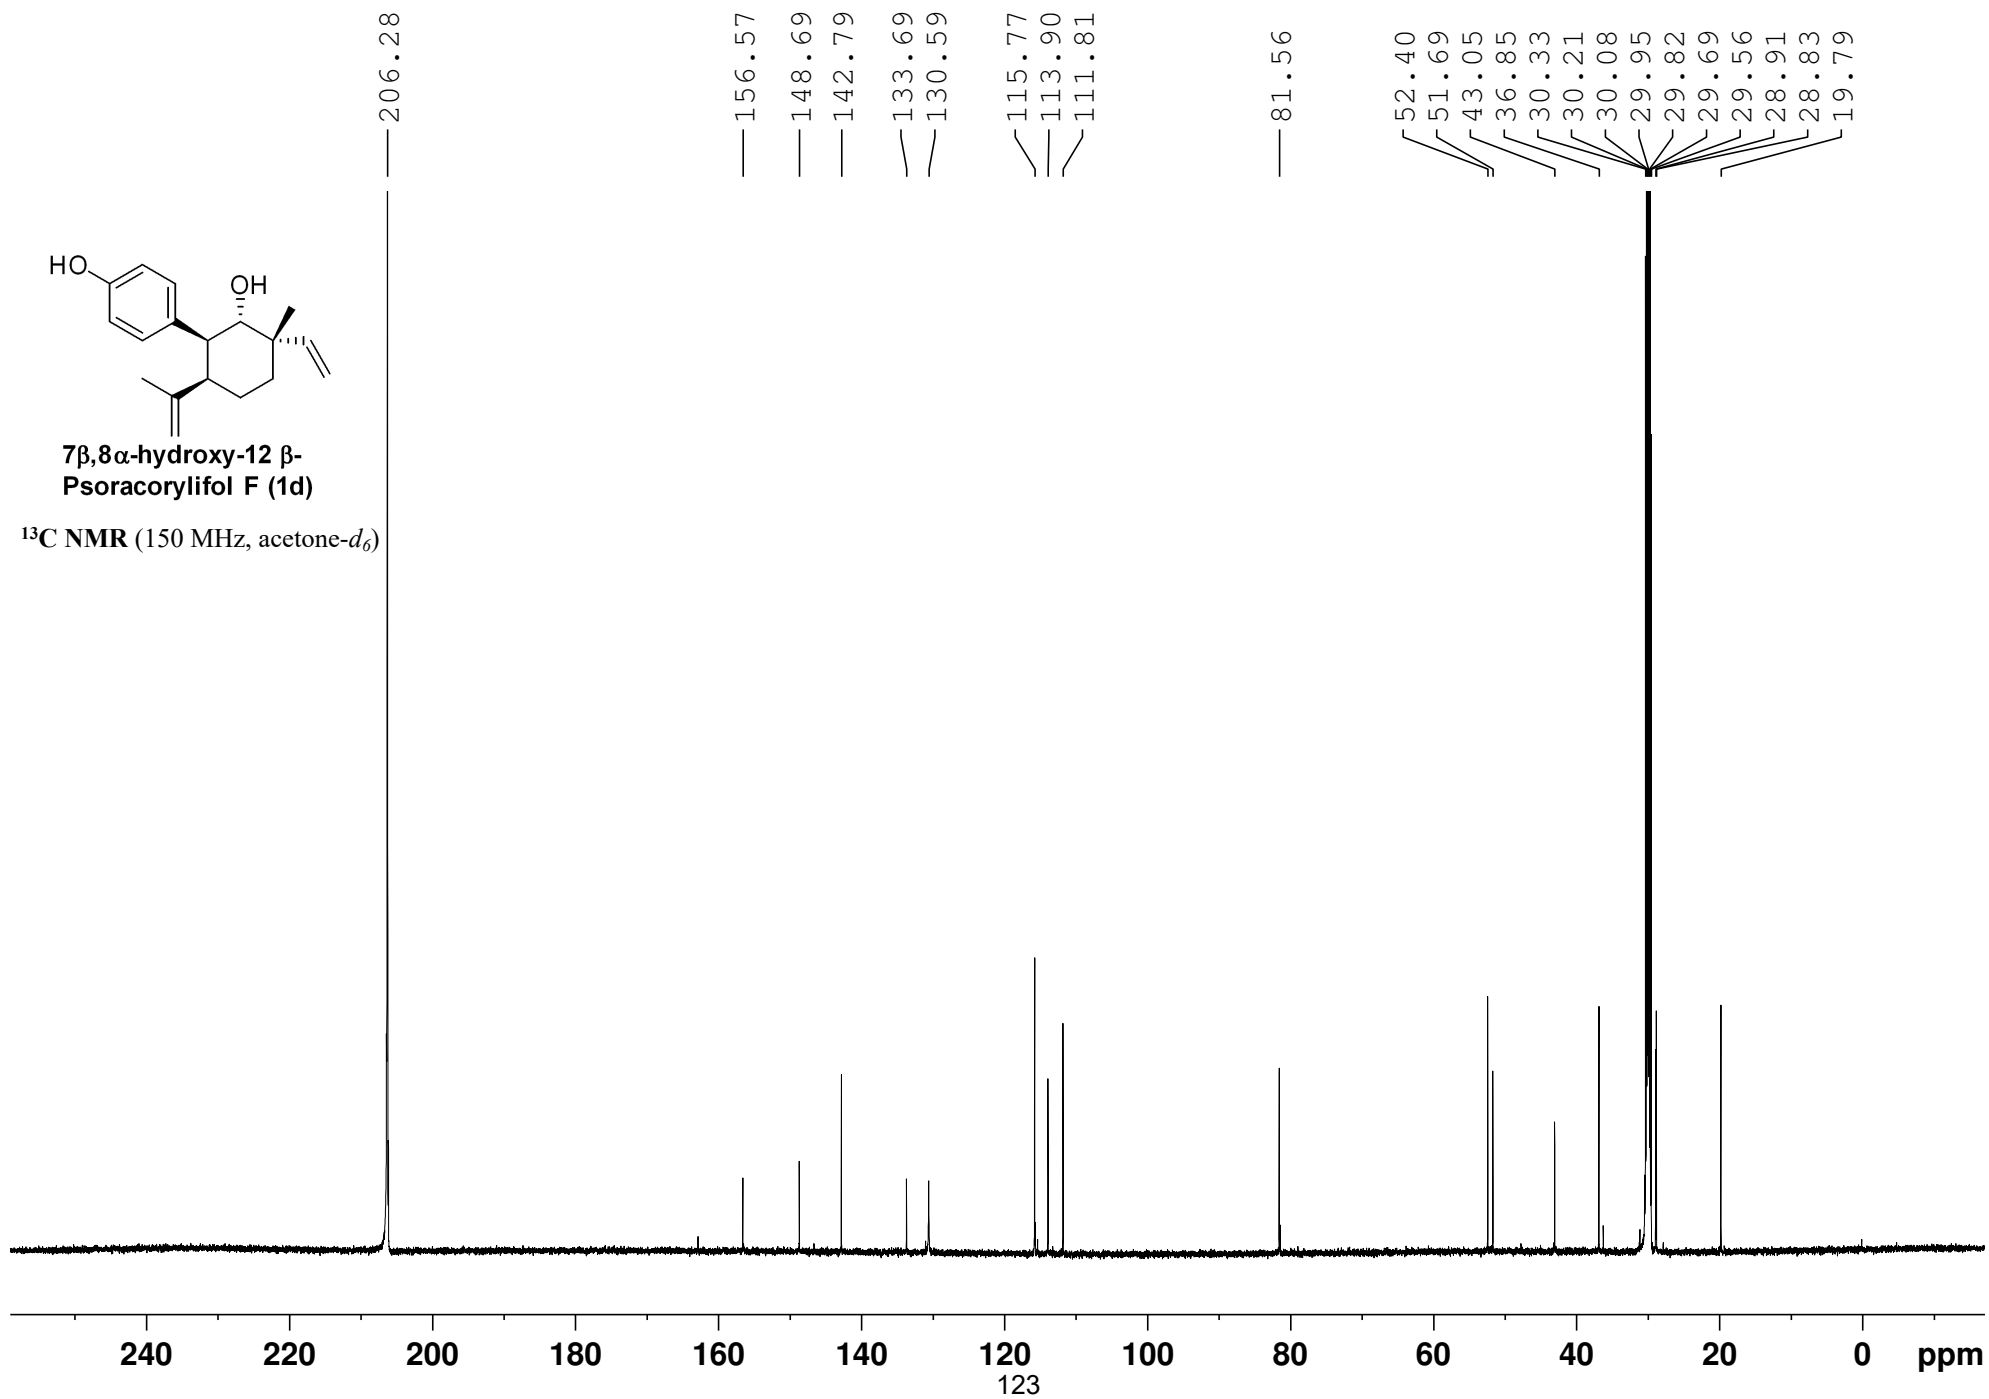

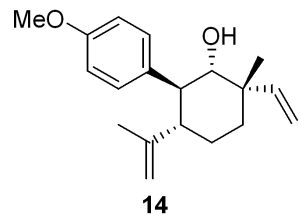

<sup>1</sup>H NMR (600 MHz, CDCl<sub>3</sub>)

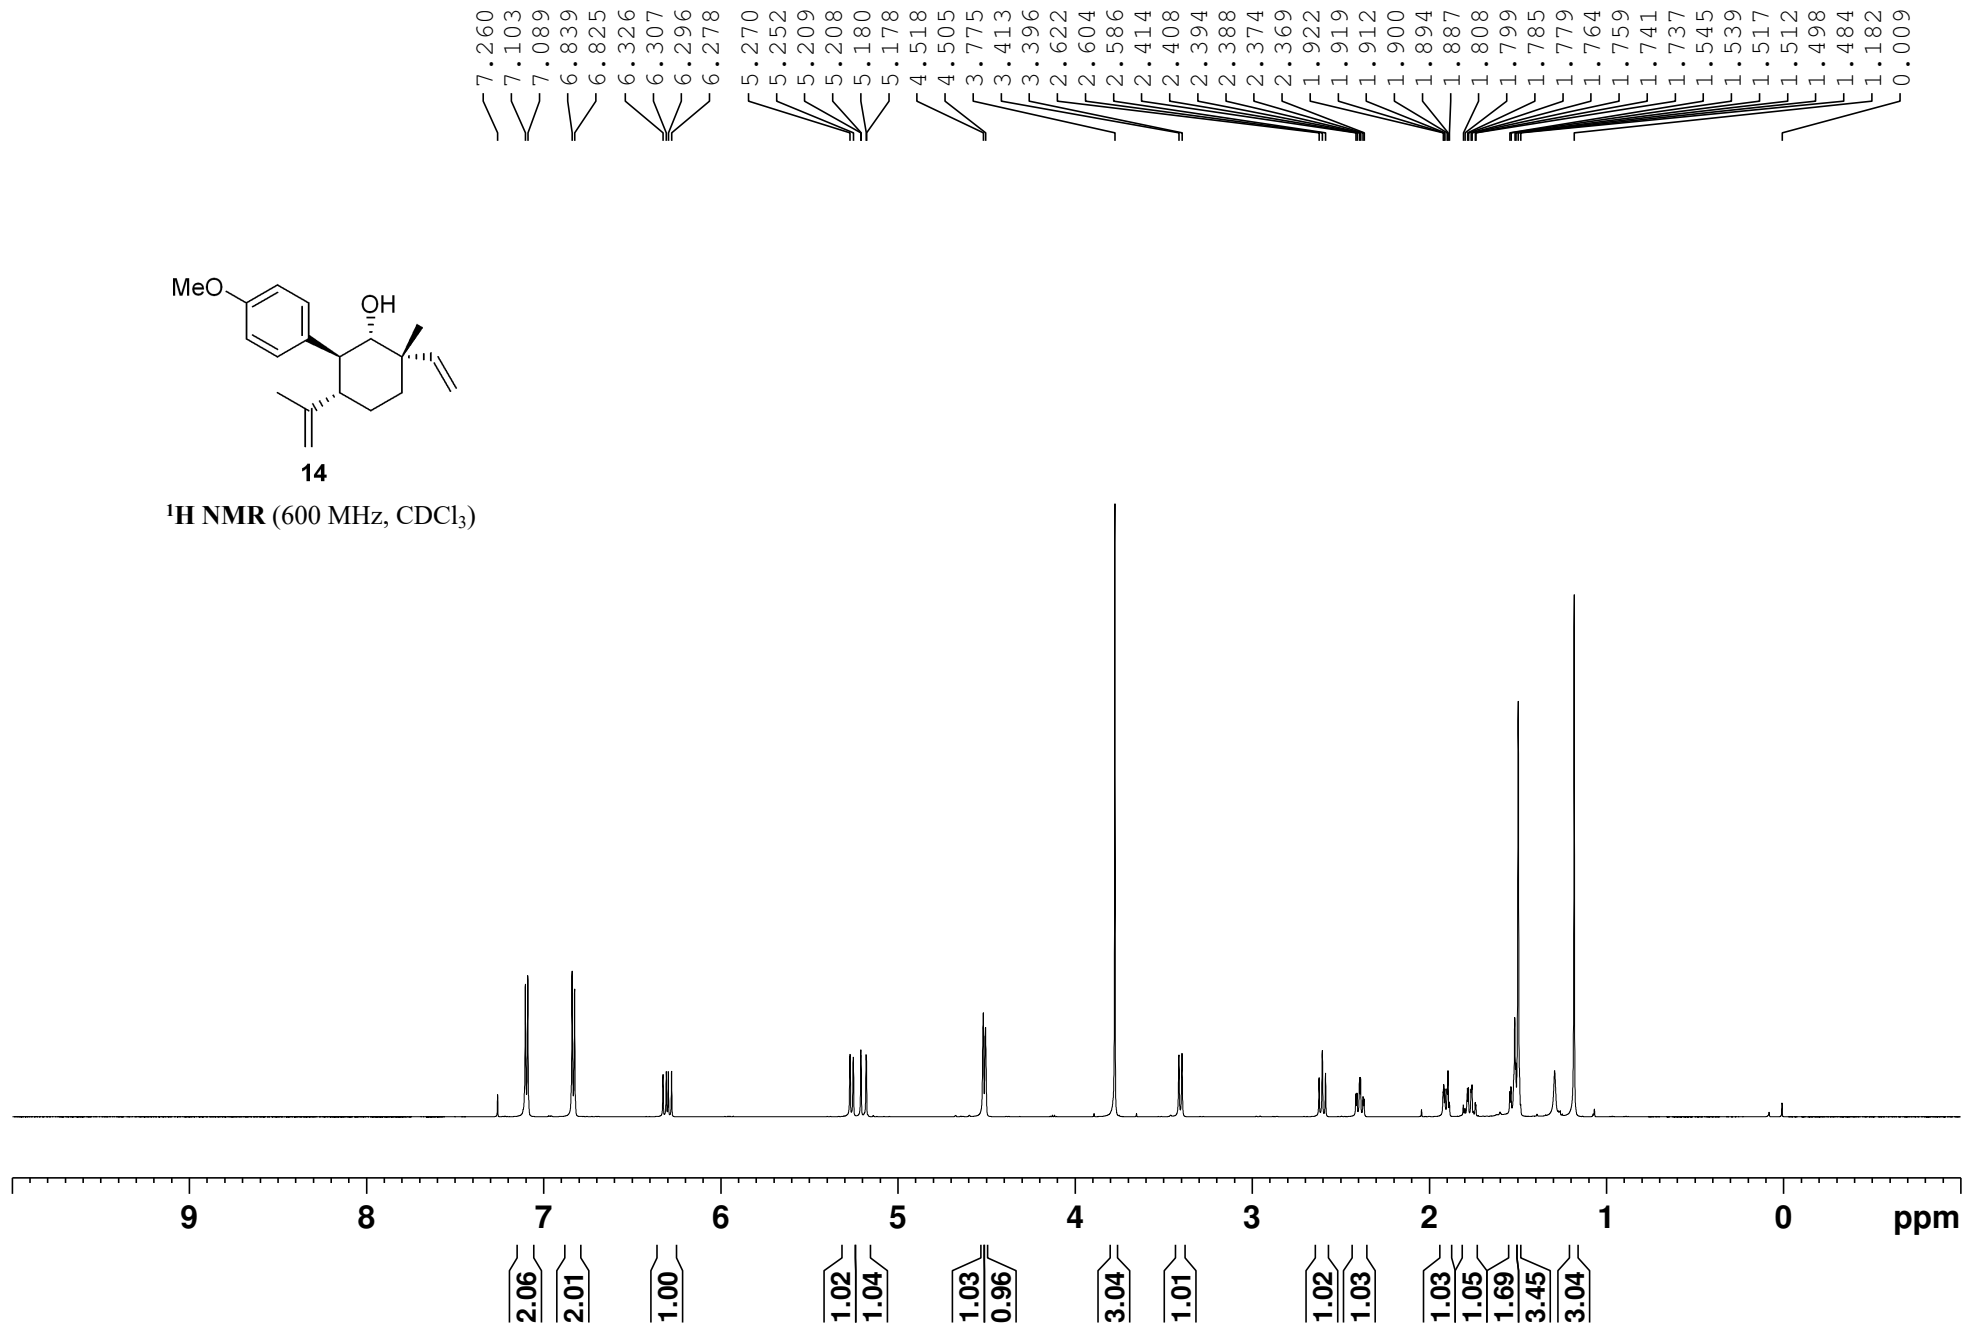



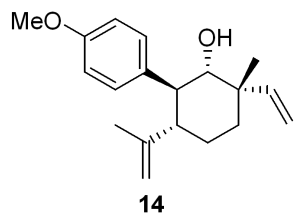

<sup>13</sup>C NMR (150 MHz, CDCl<sub>3</sub>)

— 158.24  
— 147.11  
— 140.63  
— 132.67  
— 129.44  
— 114.46  
— 113.86  
— 111.64  
— 81.21  
— 77.22  
— 77.00  
— 76.79  
— 55.08  
— 51.20  
— 50.51  
— 41.66  
— 36.60  
— 27.66  
— 27.45  
— 19.40

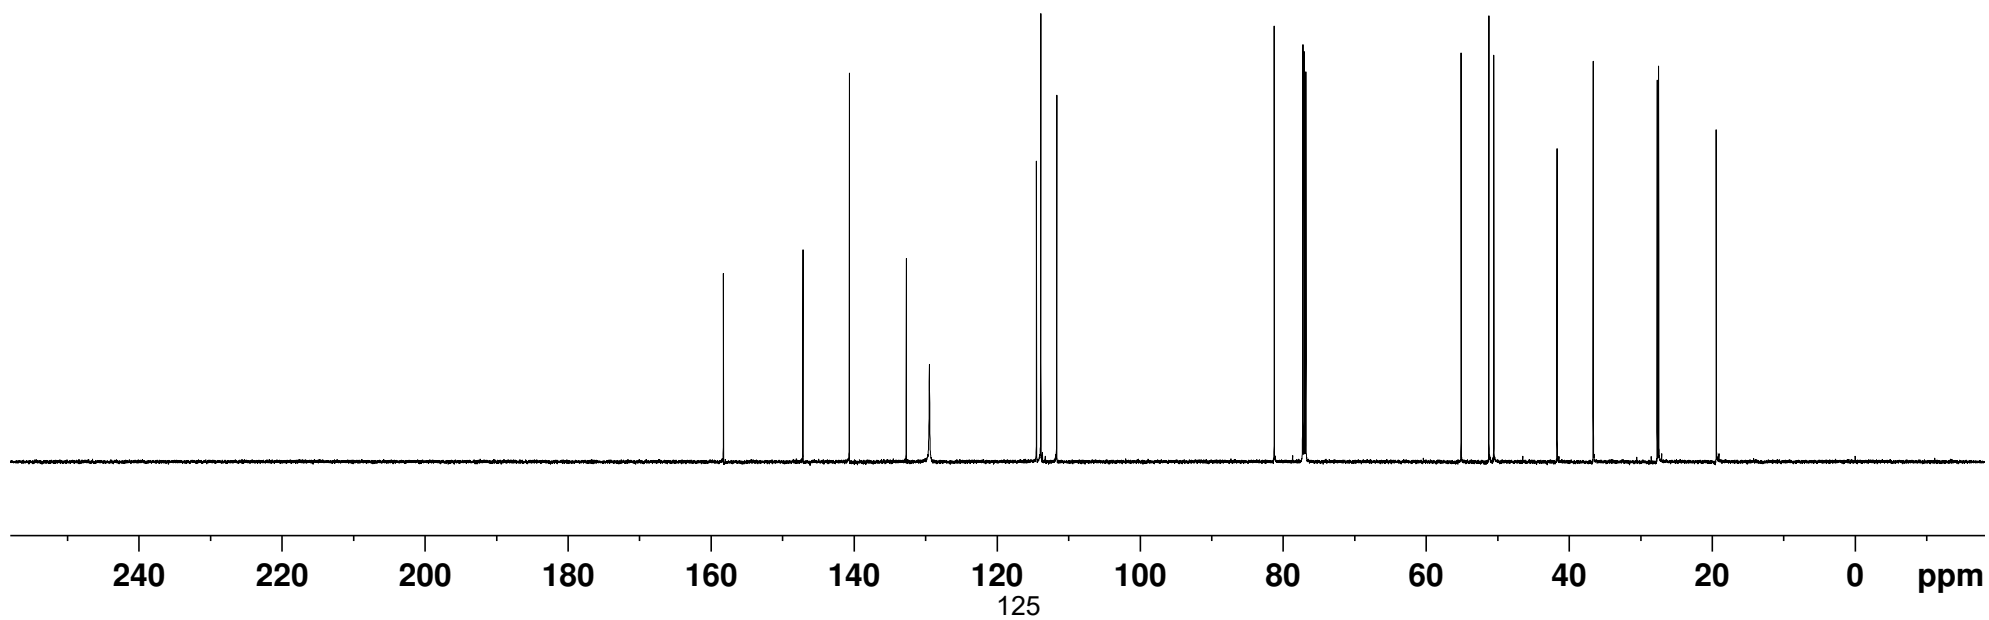

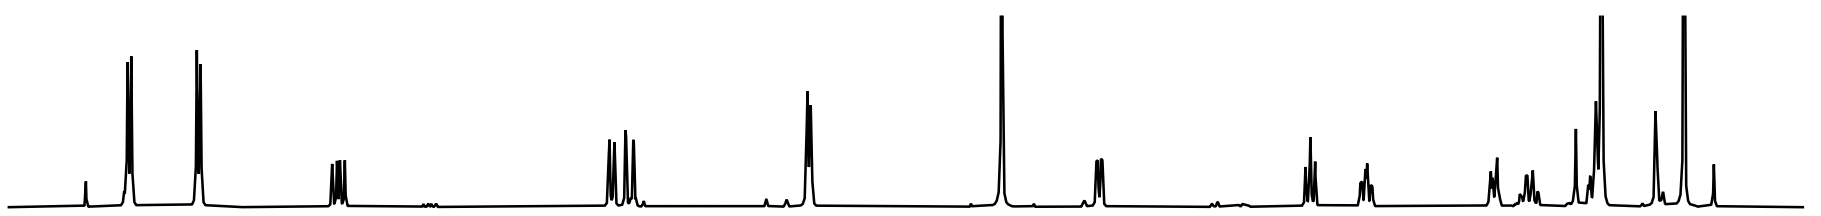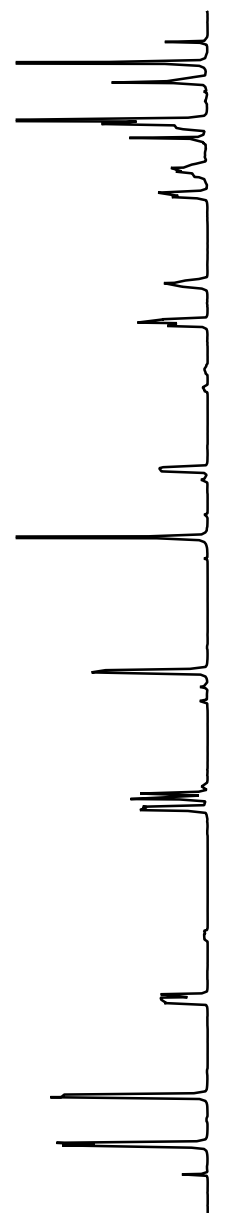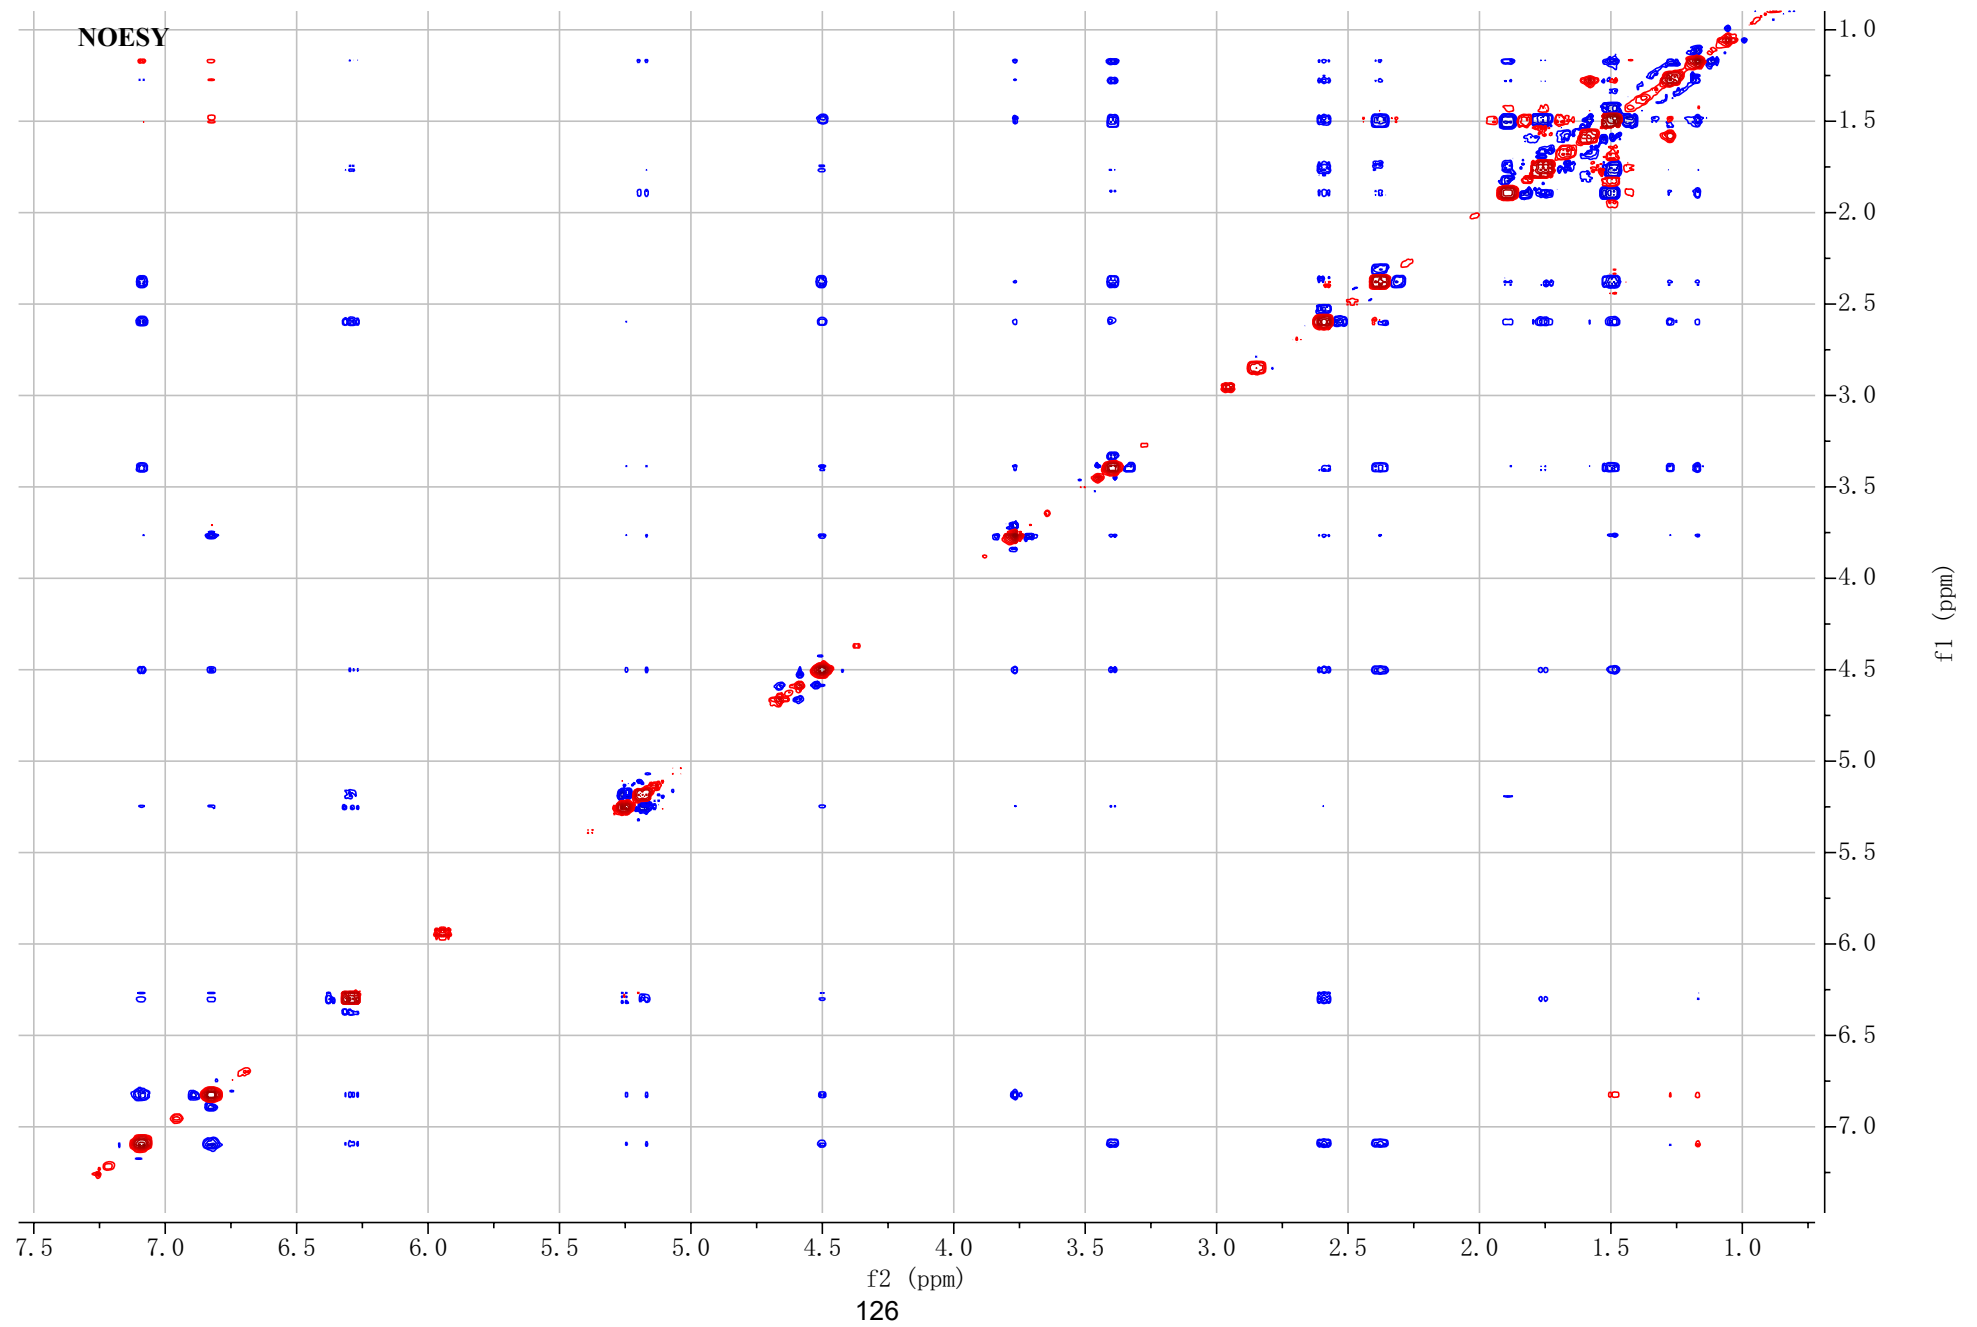

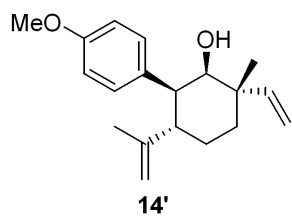

<sup>1</sup>H NMR (400 MHz, CDCl<sub>3</sub>)

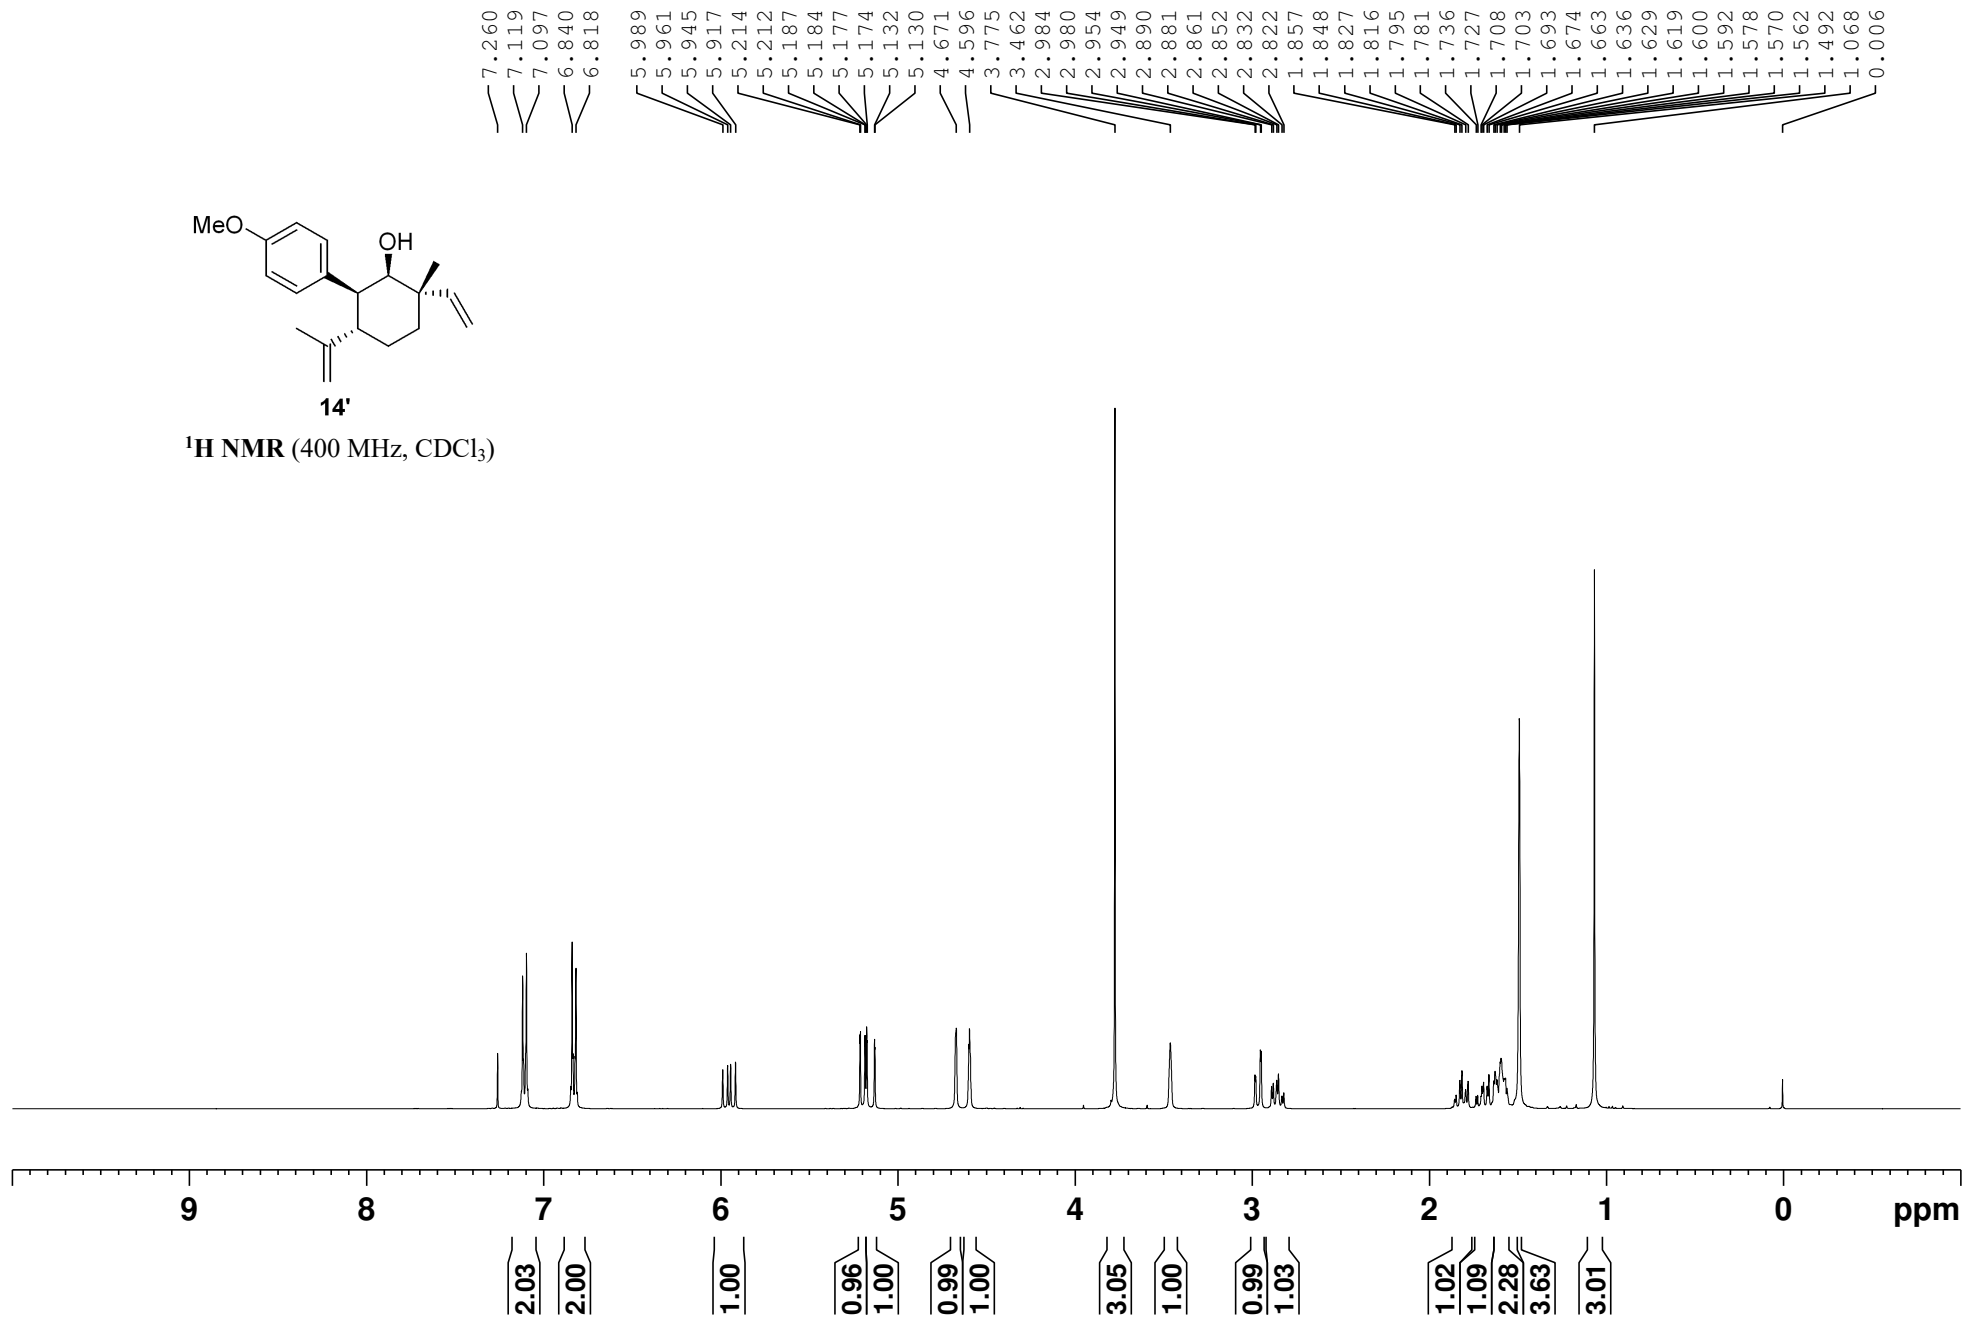

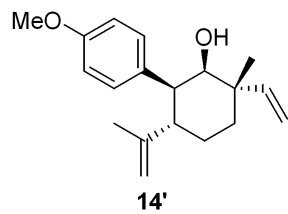

<sup>13</sup>C NMR (100 MHz, CDCl<sub>3</sub>)

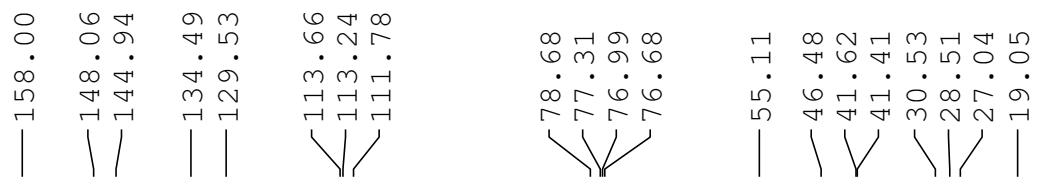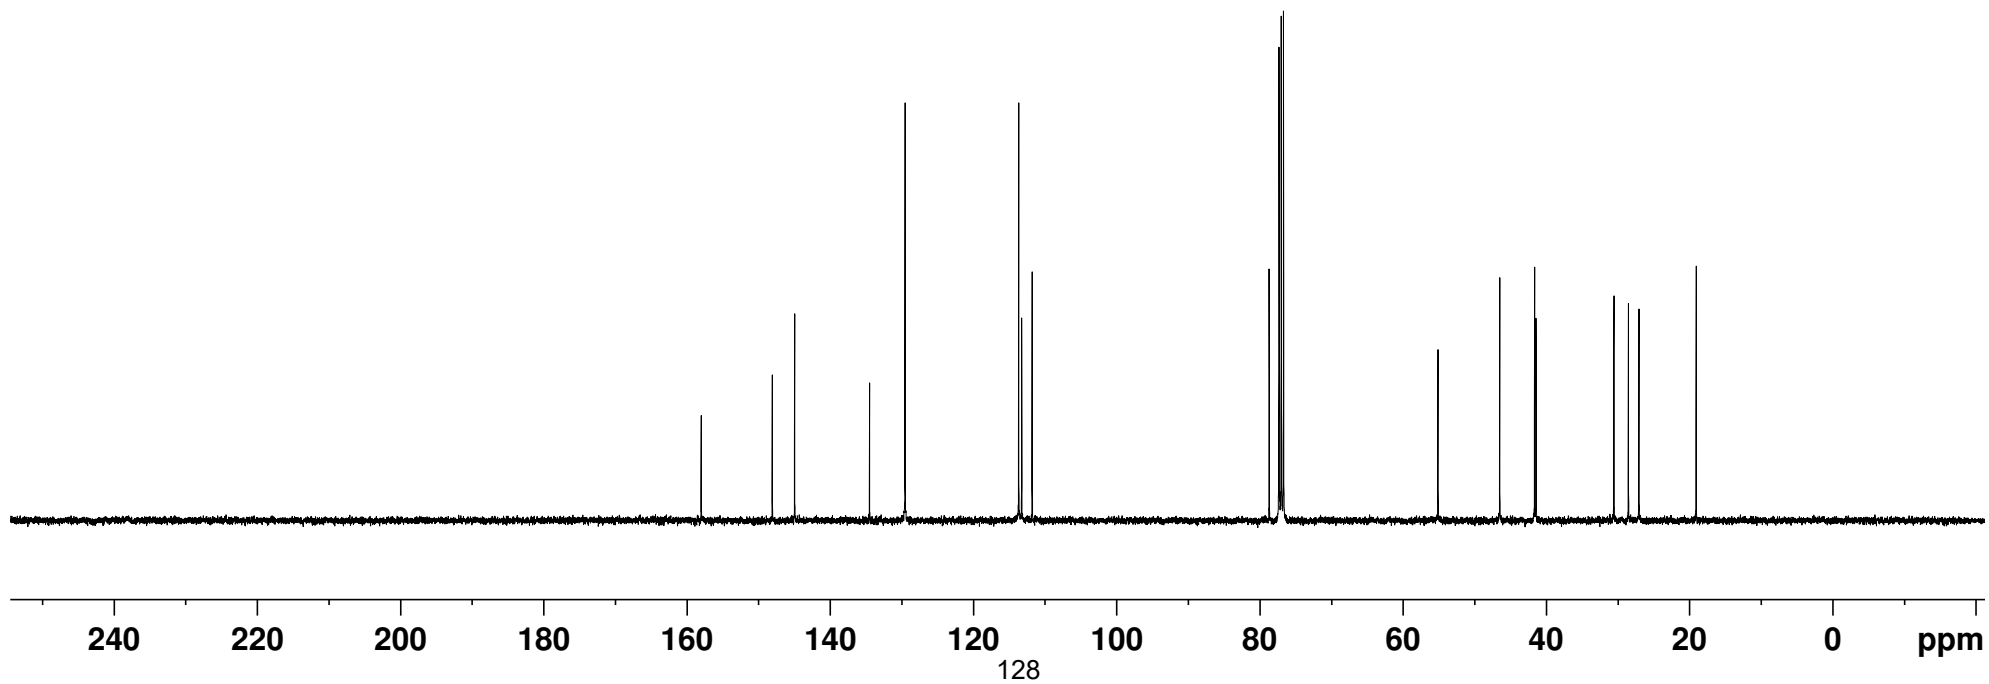

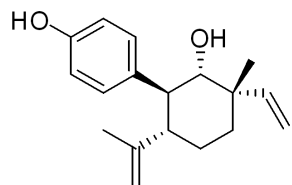

**Corypsoriol H (1e)**

<sup>1</sup>H NMR (600 MHz, methanol-d<sub>4</sub>)

7.019  
7.005  
6.698  
6.685  
6.324  
6.306  
6.295  
6.276

5.246  
5.227  
5.195  
5.165  
4.888  
4.494  
4.462  
3.441  
3.424  
3.329  
2.600  
2.582  
2.563  
2.416  
2.410  
2.396  
2.390  
2.377  
2.370  
1.951  
1.945  
1.940  
1.928  
1.923  
1.918  
1.837  
1.832  
1.815  
1.810  
1.794  
1.788  
1.772  
1.766  
1.574  
1.568  
1.552  
1.546  
1.529  
1.523  
1.484  
1.461  
1.455  
1.449  
1.444  
1.438  
1.432  
1.427  
1.150  
0.028

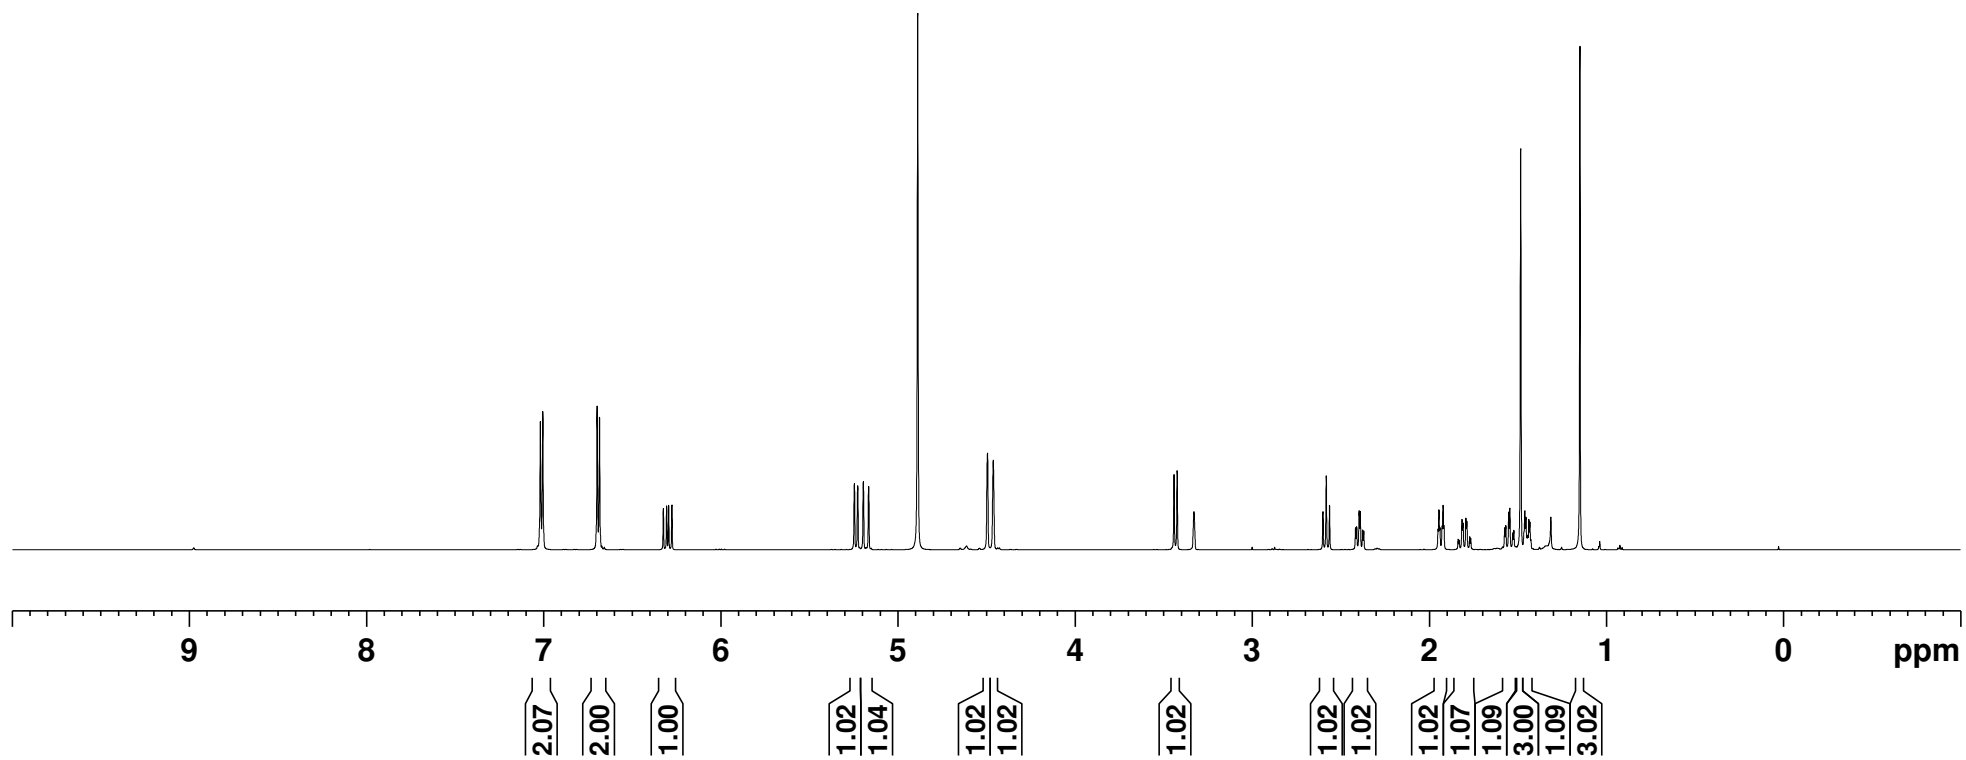

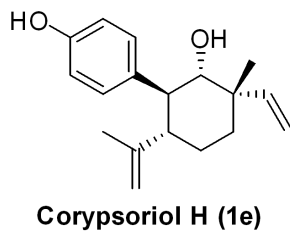

<sup>13</sup>C NMR (150 MHz, methanol-*d*<sub>4</sub>)

- 156.65
- 149.01
- 142.52
- 134.54
- 130.84
- 115.97
- 114.78
- 112.18
- 82.42
- 53.64
- 51.91
- 49.64
- 49.50
- 49.35
- 49.21
- 49.07
- 48.93
- 48.79
- 43.62
- 37.78
- 29.12
- 28.65
- 20.00

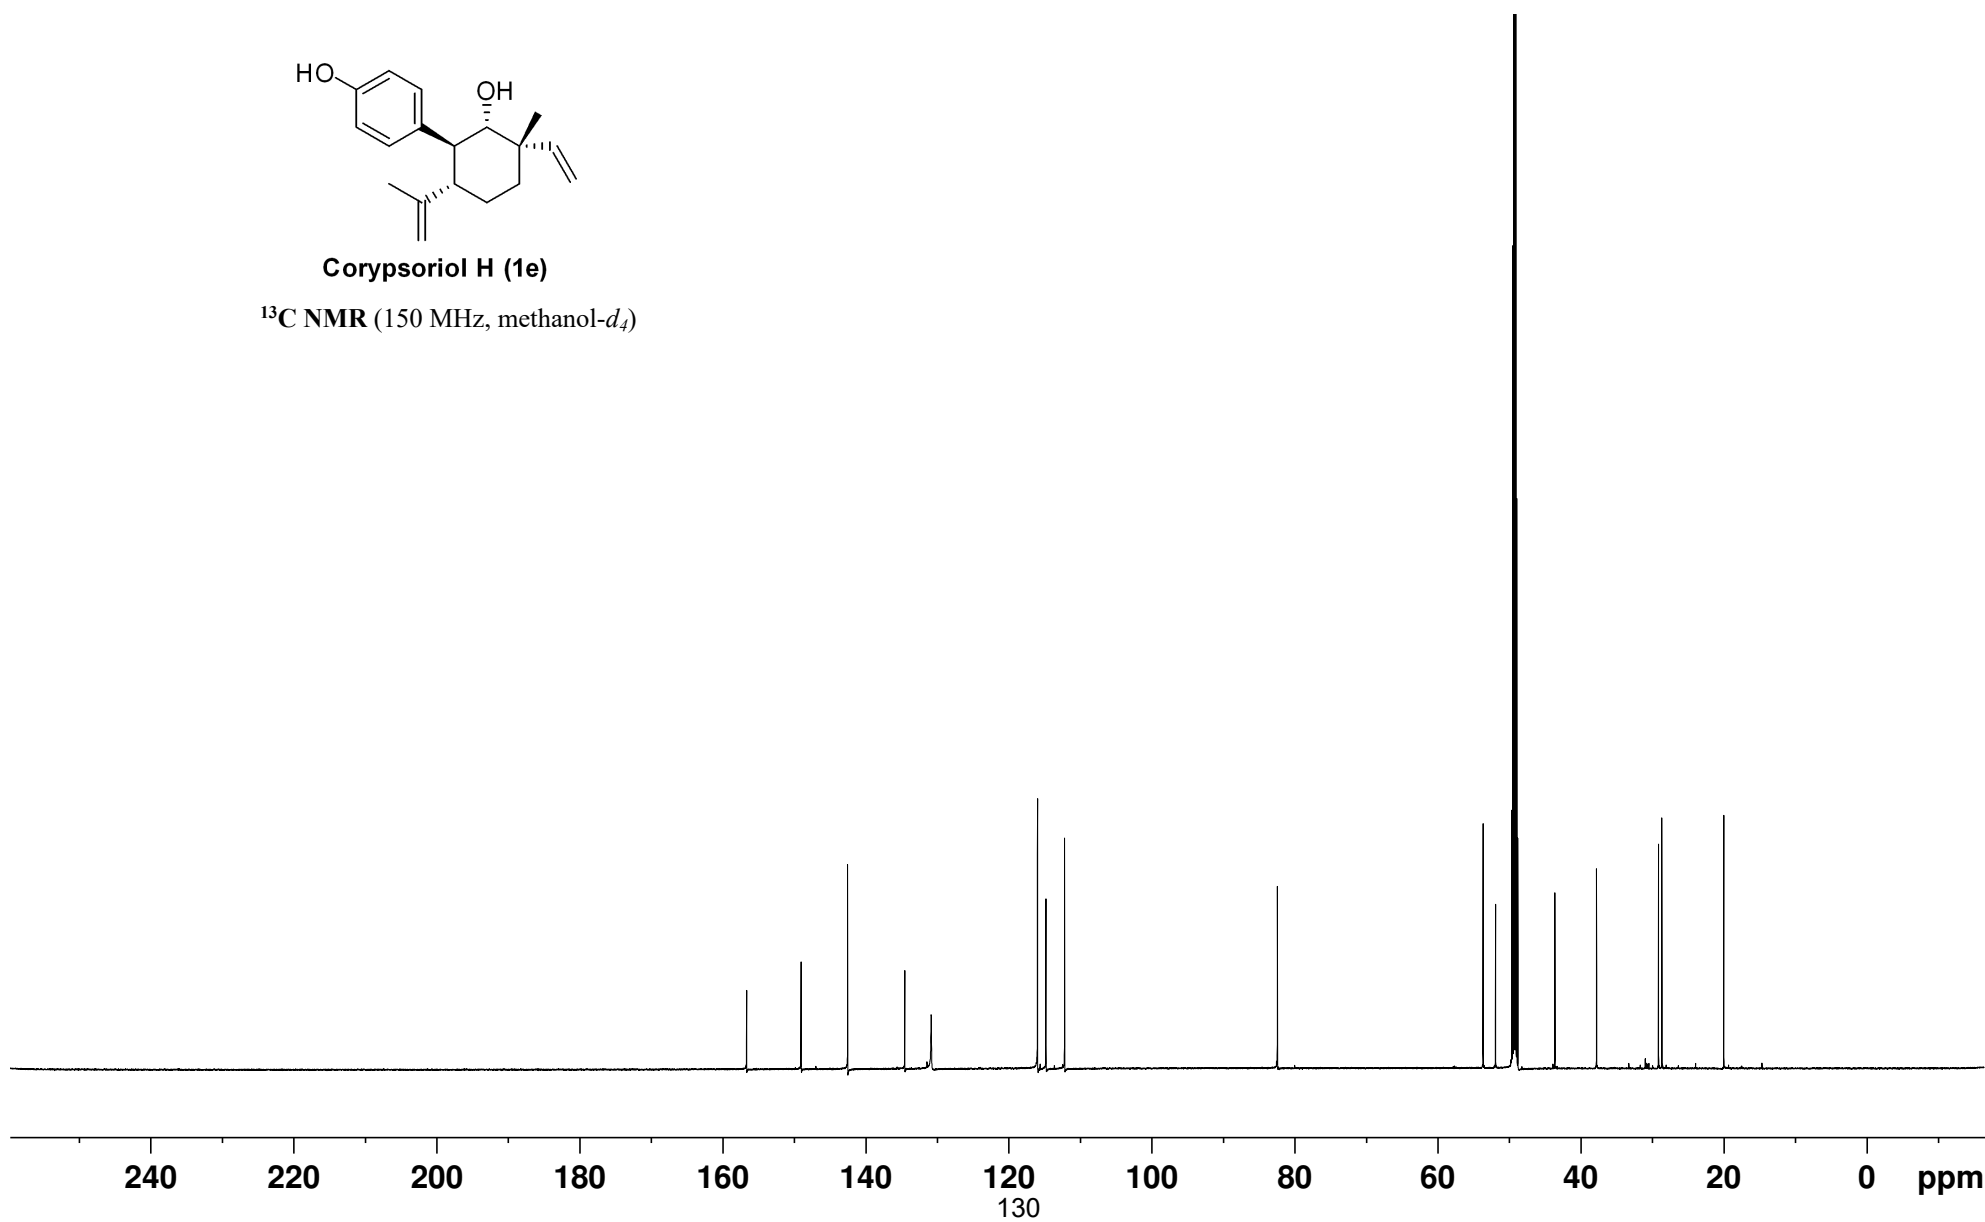

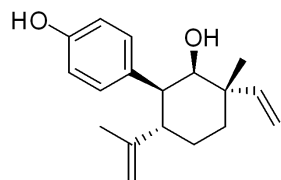

**Psoracorylifol G (1f)**

<sup>1</sup>H NMR (600 MHz, CDCl<sub>3</sub>)

7.260  
7.054  
7.041  
6.741  
6.729  
5.967  
5.948  
5.937  
5.918  
5.204  
5.186  
5.163  
5.133  
5.067  
4.662  
4.591  
3.470  
2.963  
2.942  
2.849  
2.831  
2.812  
1.824  
1.802  
1.784  
1.704  
1.686  
1.663  
1.640  
1.620  
1.592  
1.577  
1.565  
1.562  
1.483  
1.068  
0.001

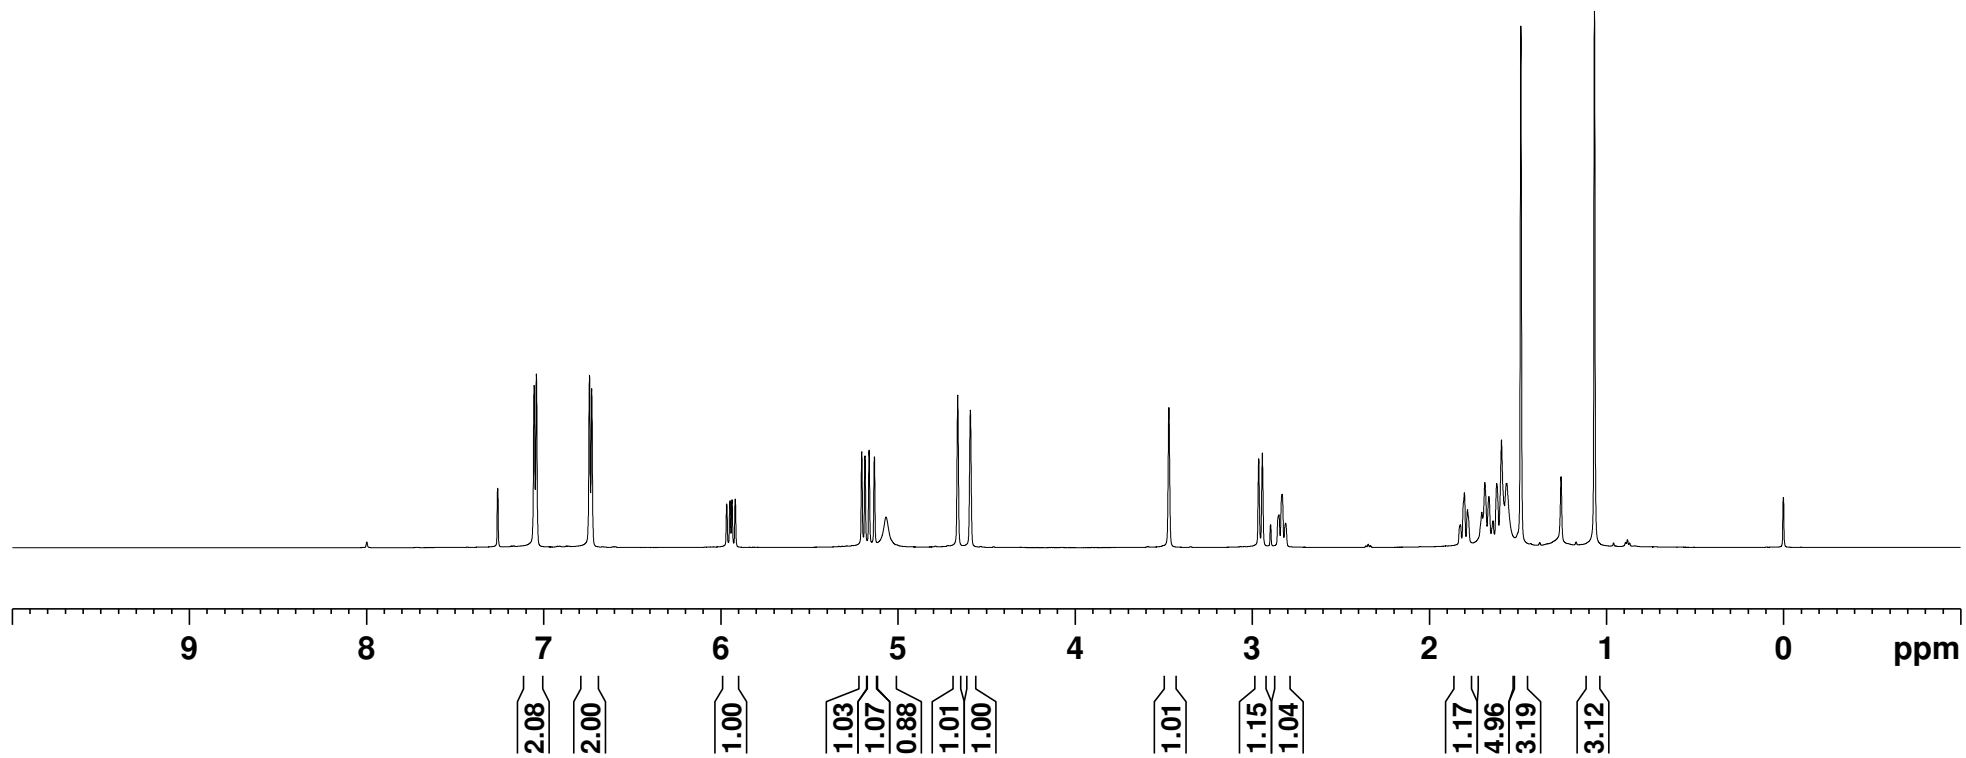

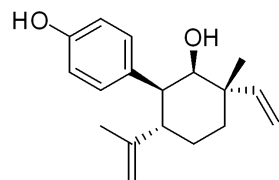

Psoracorylifol G (1f)

$^{13}\text{C}$  NMR (150 MHz,  $\text{CDCl}_3$ )

154.00  
147.99  
144.88  
134.53  
129.74  
115.18  
113.30  
111.85  
78.80  
77.21  
77.00  
76.79  
46.44  
41.63  
41.39  
30.53  
28.47  
27.05  
19.03

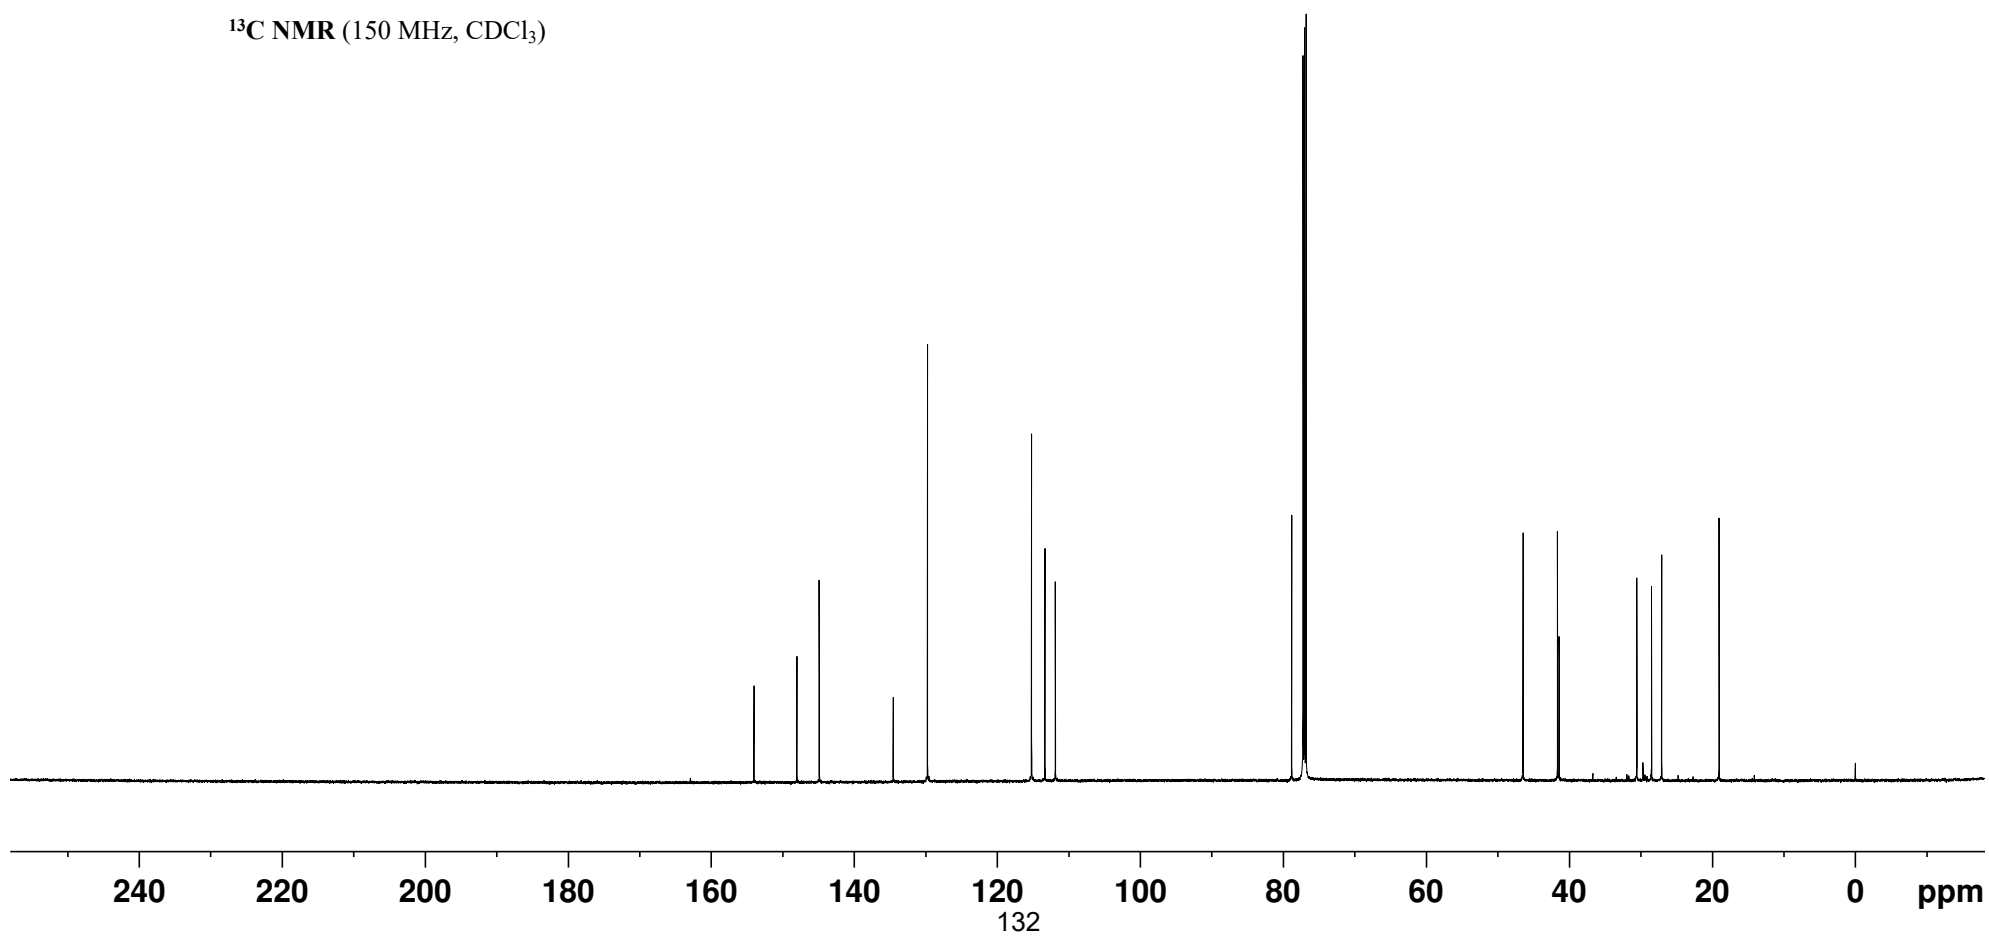



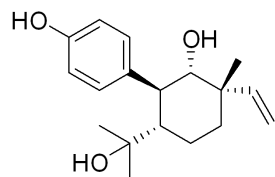

**8 $\alpha$ -hydroxy-  
Cyclobakuchiol C (1g)**

$^1\text{H}$  NMR (600 MHz, acetone- $d_6$ )

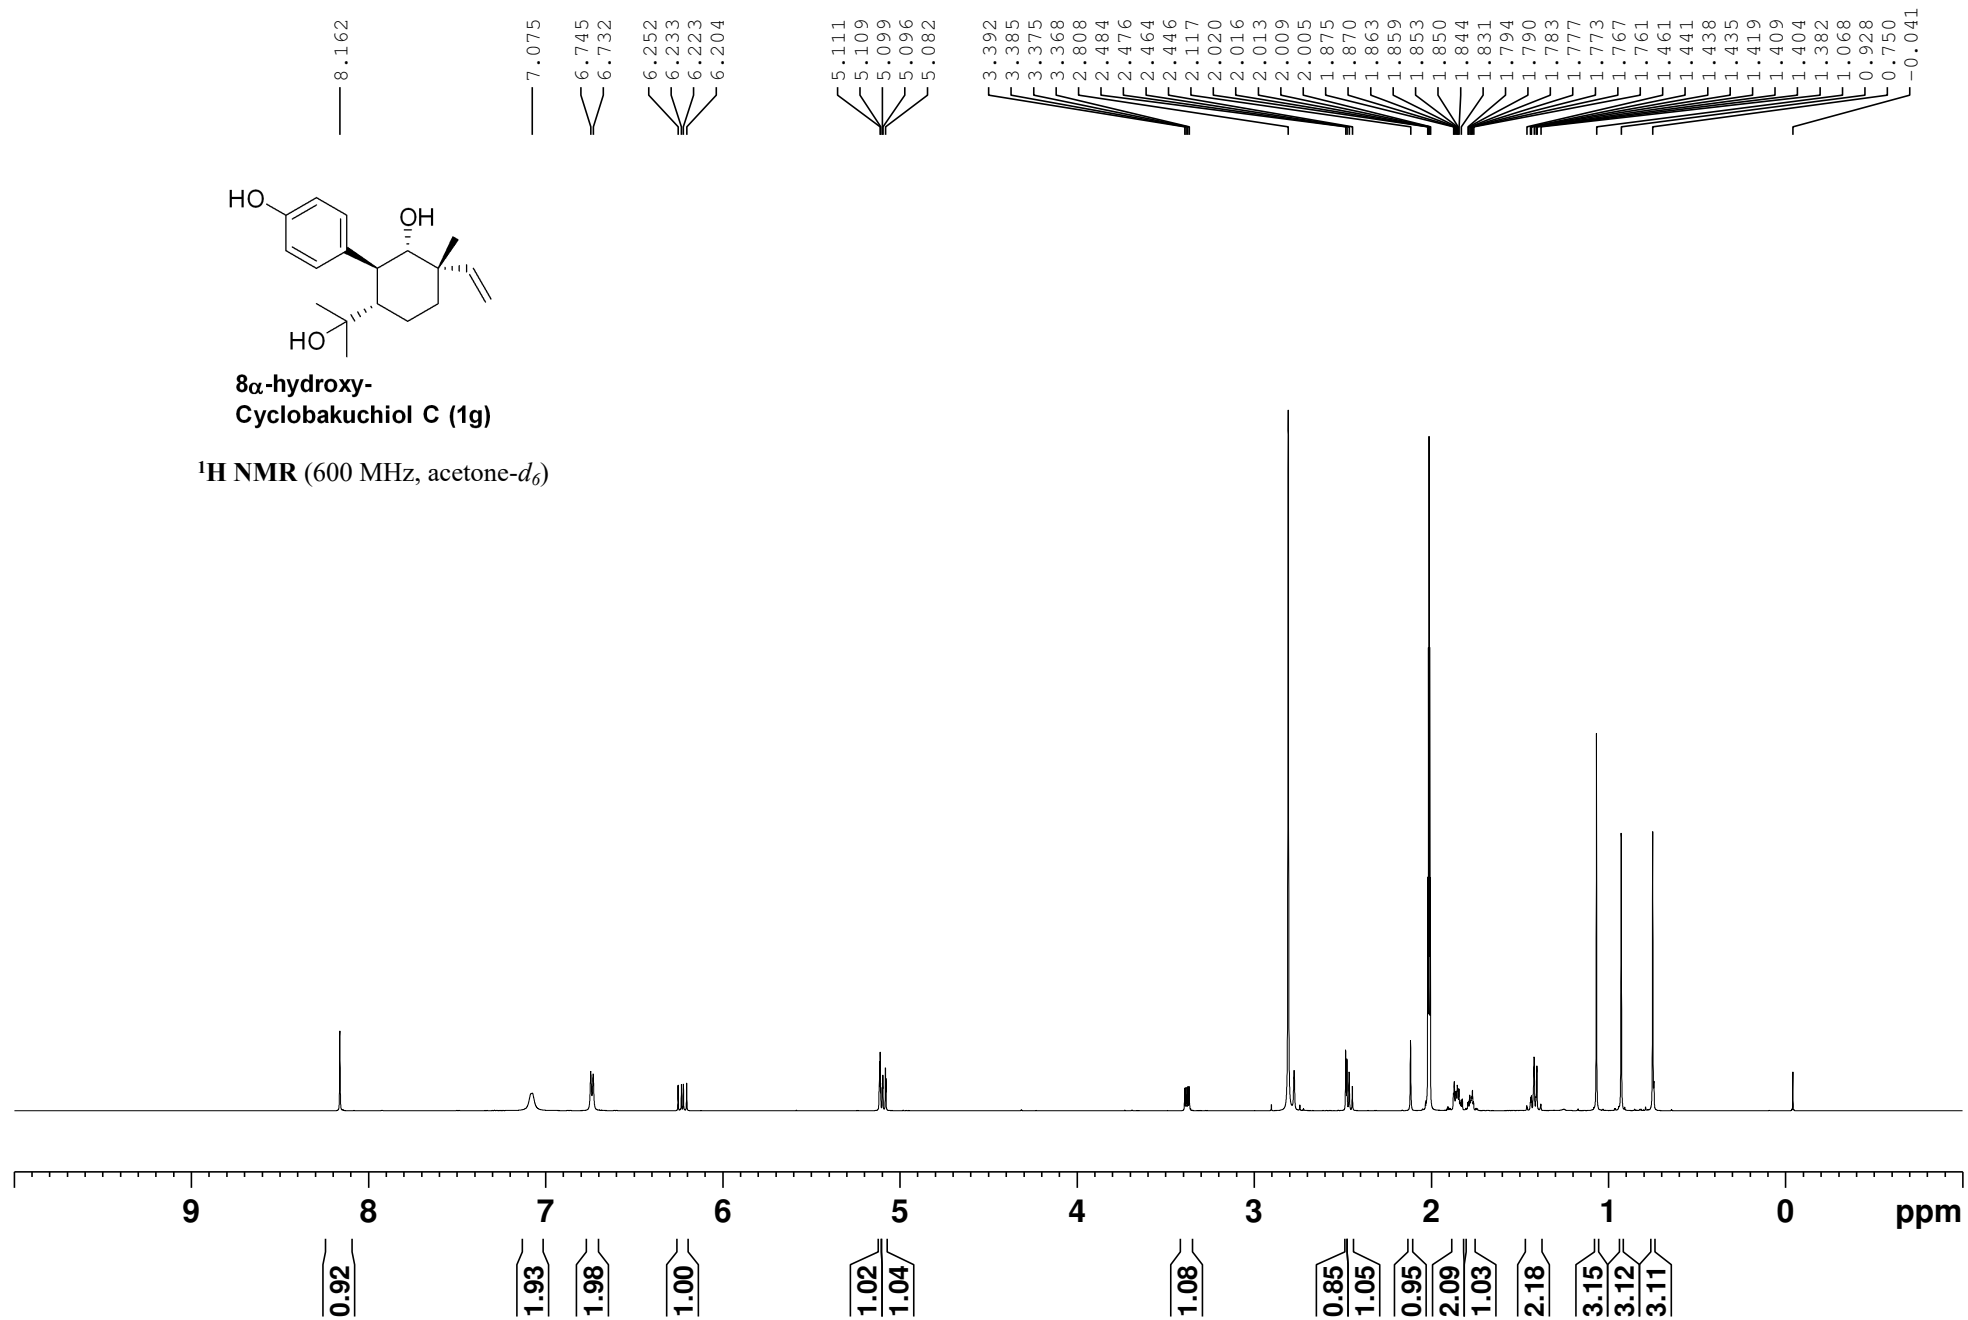

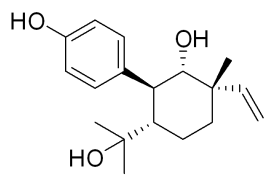

**8 $\alpha$ -hydroxy-  
Cyclobakuchiol C (1g)**

$^{13}\text{C}$  NMR (150 MHz, acetone- $d_6$ )

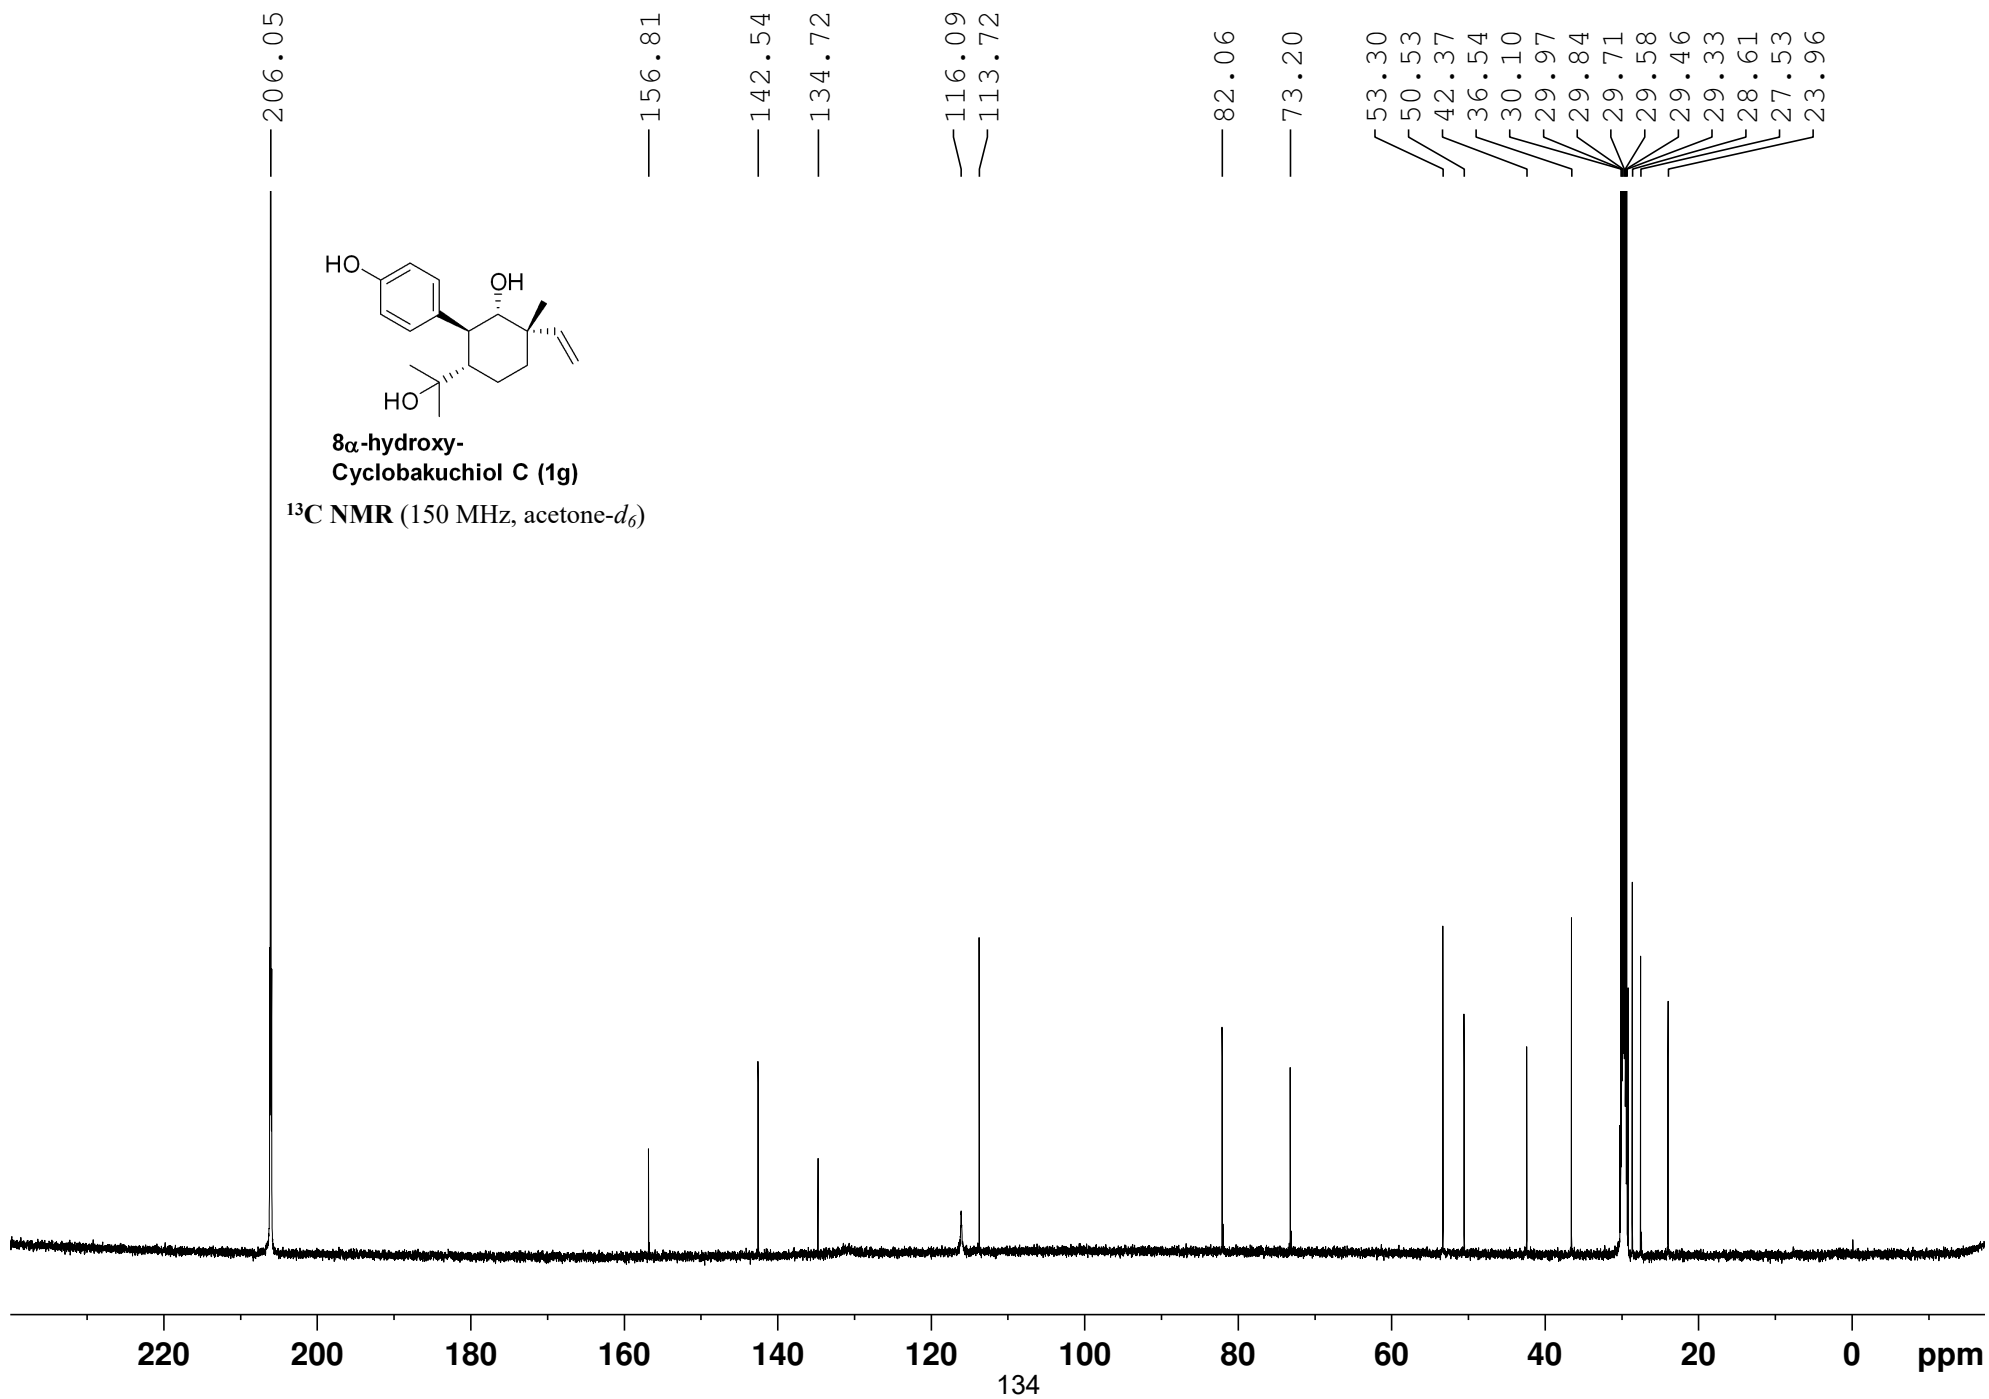

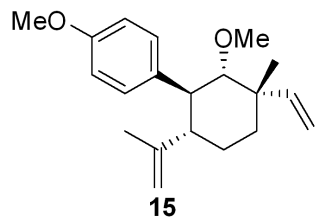

<sup>1</sup>H NMR (400 MHz, CDCl<sub>3</sub>)

7.260  
7.120  
7.099  
6.808  
6.786  
6.267  
6.239  
6.222  
6.195  
5.221  
5.217  
5.193  
5.190  
5.151  
5.147  
5.106  
5.102  
4.543  
4.514  
3.775  
2.848  
2.822  
2.740  
2.677  
2.648  
2.622  
2.483  
2.474  
2.453  
2.444  
2.423  
2.414  
1.907  
1.900  
1.892  
1.873  
1.866  
1.773  
1.757  
1.738  
1.729  
1.707  
1.699  
1.689  
1.672  
1.668  
1.651  
1.517  
1.507  
1.493  
1.476  
1.471  
1.460  
1.456  
1.447  
1.439  
1.429  
1.129  
0.000

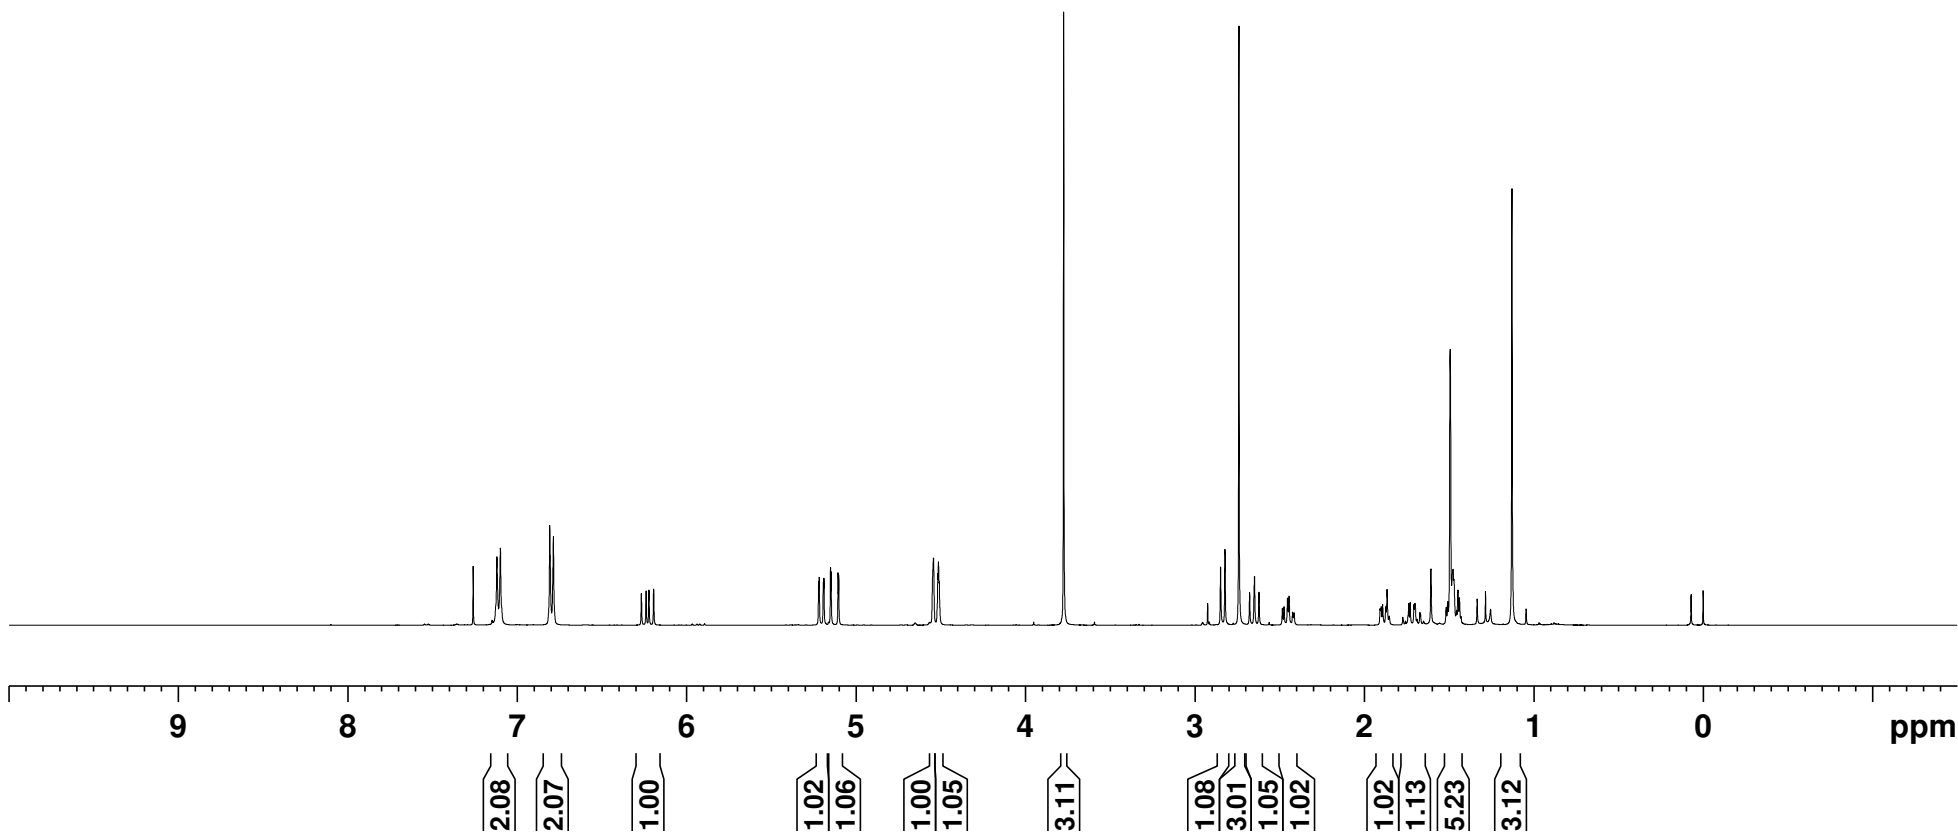

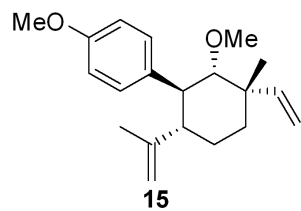

<sup>13</sup>C NMR (100 MHz, CDCl<sub>3</sub>)

- 157.74
- 147.22
- 141.41
- 134.11
- 129.80
- 113.78
- 113.12
- 111.65
- 92.73
- 77.31
- 77.00
- 76.68
- 61.39
- 55.03
- 50.99
- 49.35
- 43.10
- 36.73
- 27.78
- 27.62
- 19.18

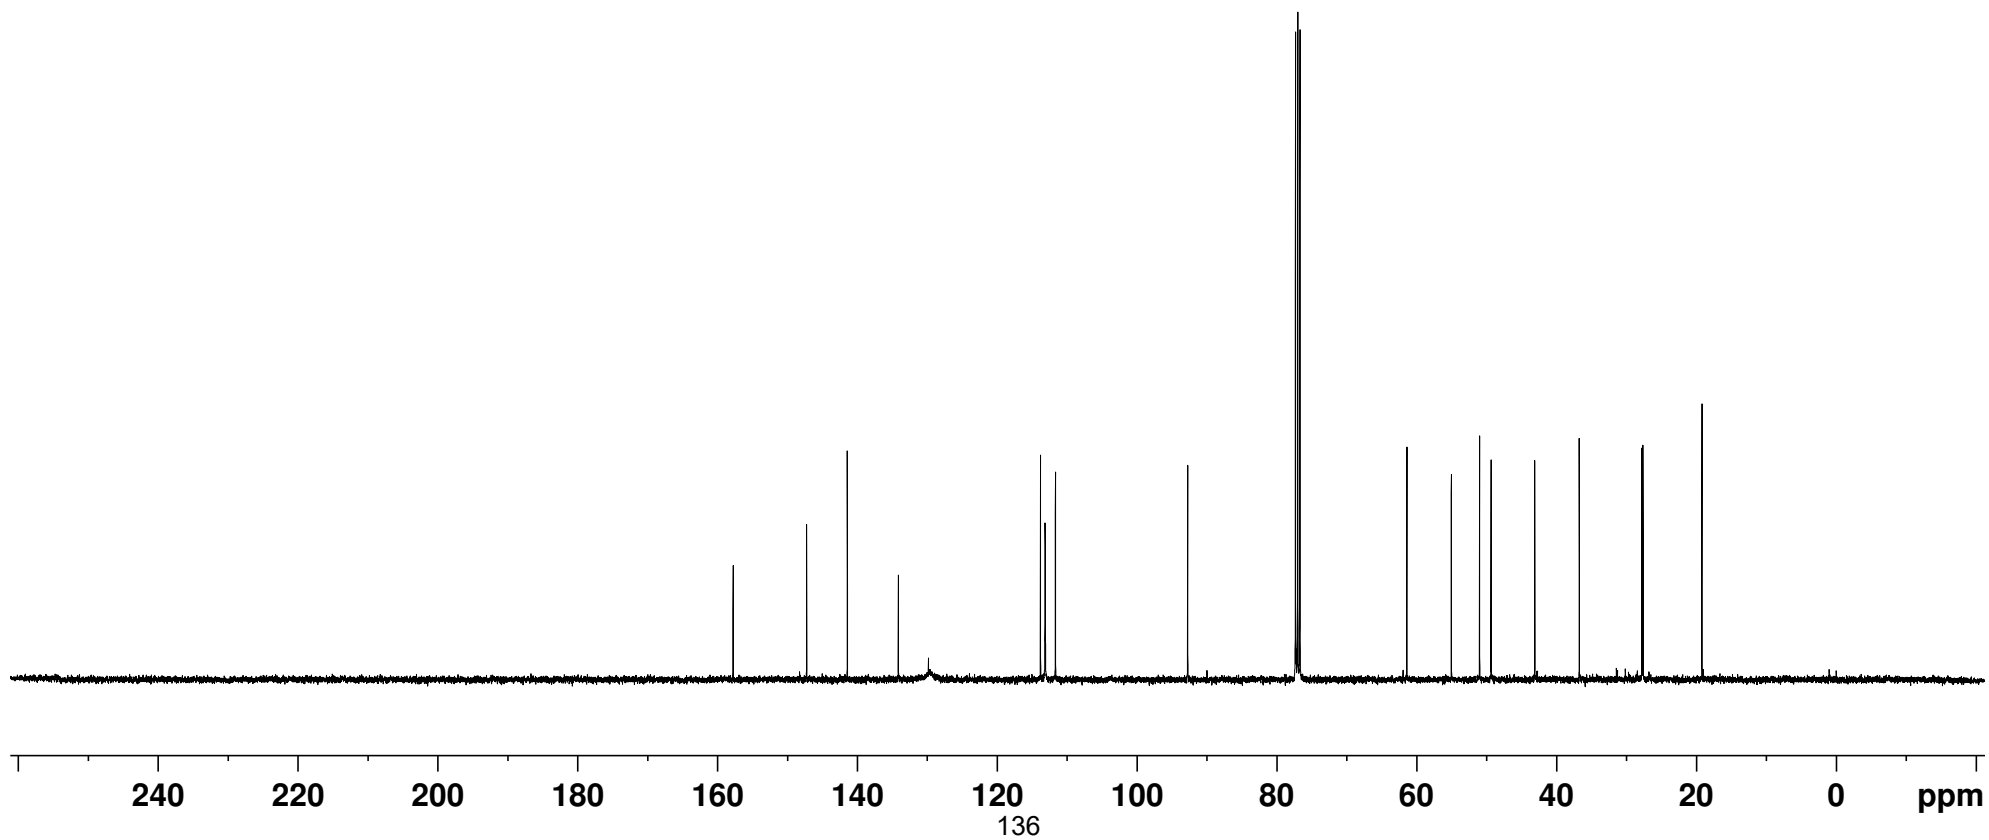

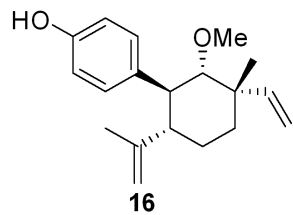

<sup>1</sup>H NMR (400 MHz, CDCl<sub>3</sub>)

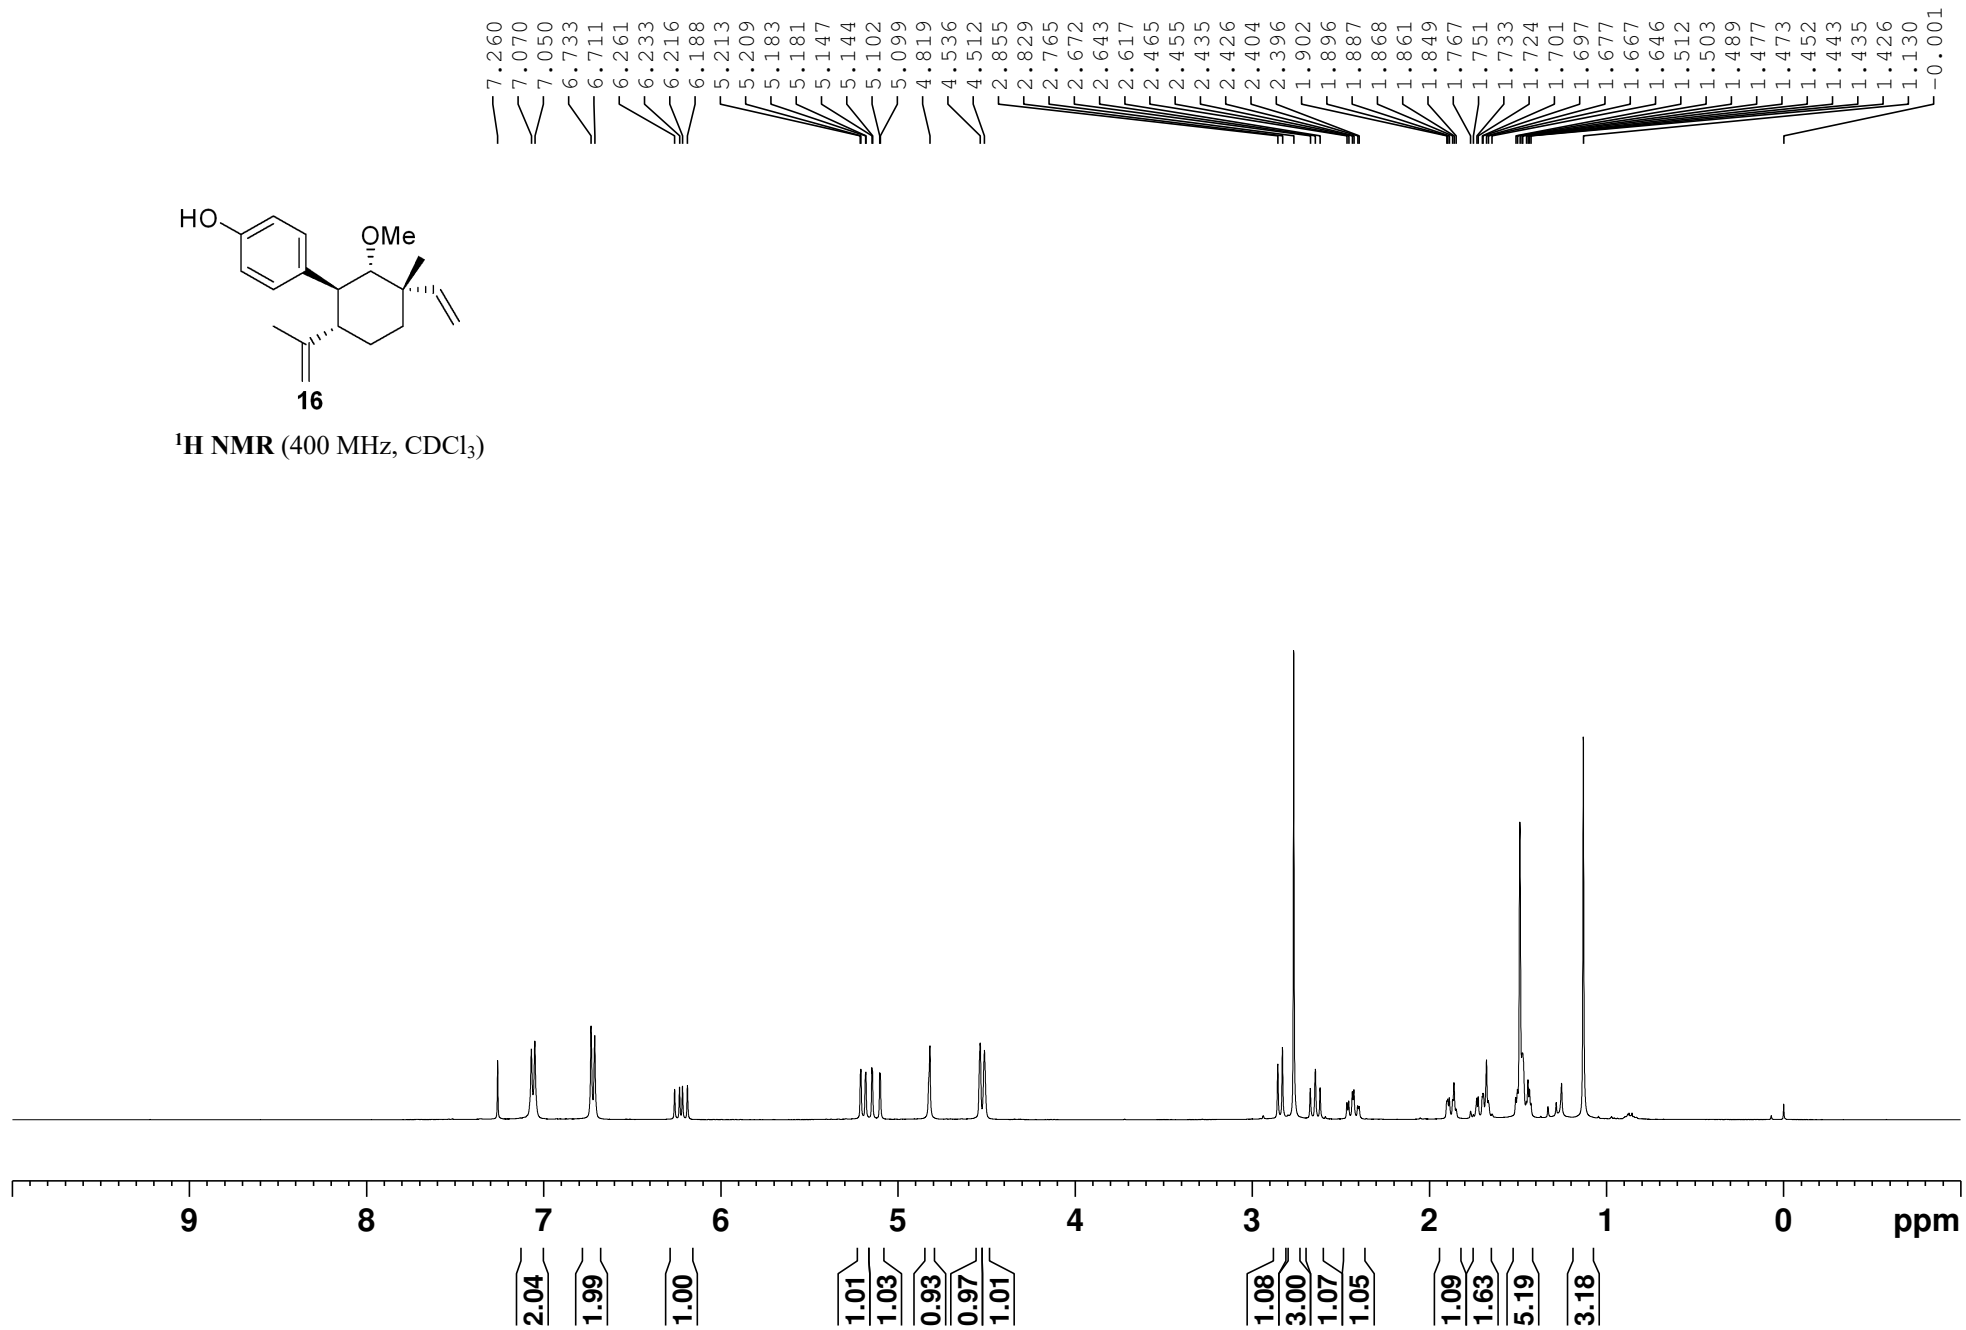

7.260  
7.070  
7.050  
6.733  
6.711  
6.261  
6.233  
6.216  
6.188  
5.213  
5.209  
5.183  
5.181  
5.147  
5.144  
5.102  
5.099  
4.819  
4.536  
4.512  
2.855  
2.829  
2.765  
2.672  
2.643  
2.617  
2.465  
2.455  
2.435  
2.426  
2.404  
2.396  
1.902  
1.896  
1.887  
1.868  
1.861  
1.849  
1.767  
1.751  
1.733  
1.724  
1.701  
1.697  
1.677  
1.667  
1.646  
1.512  
1.503  
1.489  
1.477  
1.473  
1.452  
1.443  
1.435  
1.426  
1.130  
-0.001

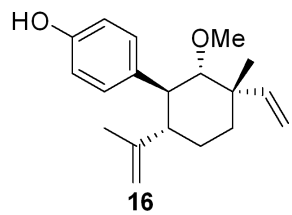

<sup>13</sup>C NMR (150 MHz, CDCl<sub>3</sub>)

- 153.68
- 147.17
- 141.32
- 134.26
- 130.00
- 114.75
- 113.86
- 111.68
- 92.81
- 77.21
- 76.99
- 76.78
- 61.39
- 51.06
- 49.35
- 43.10
- 36.77
- 27.77
- 27.59
- 19.19

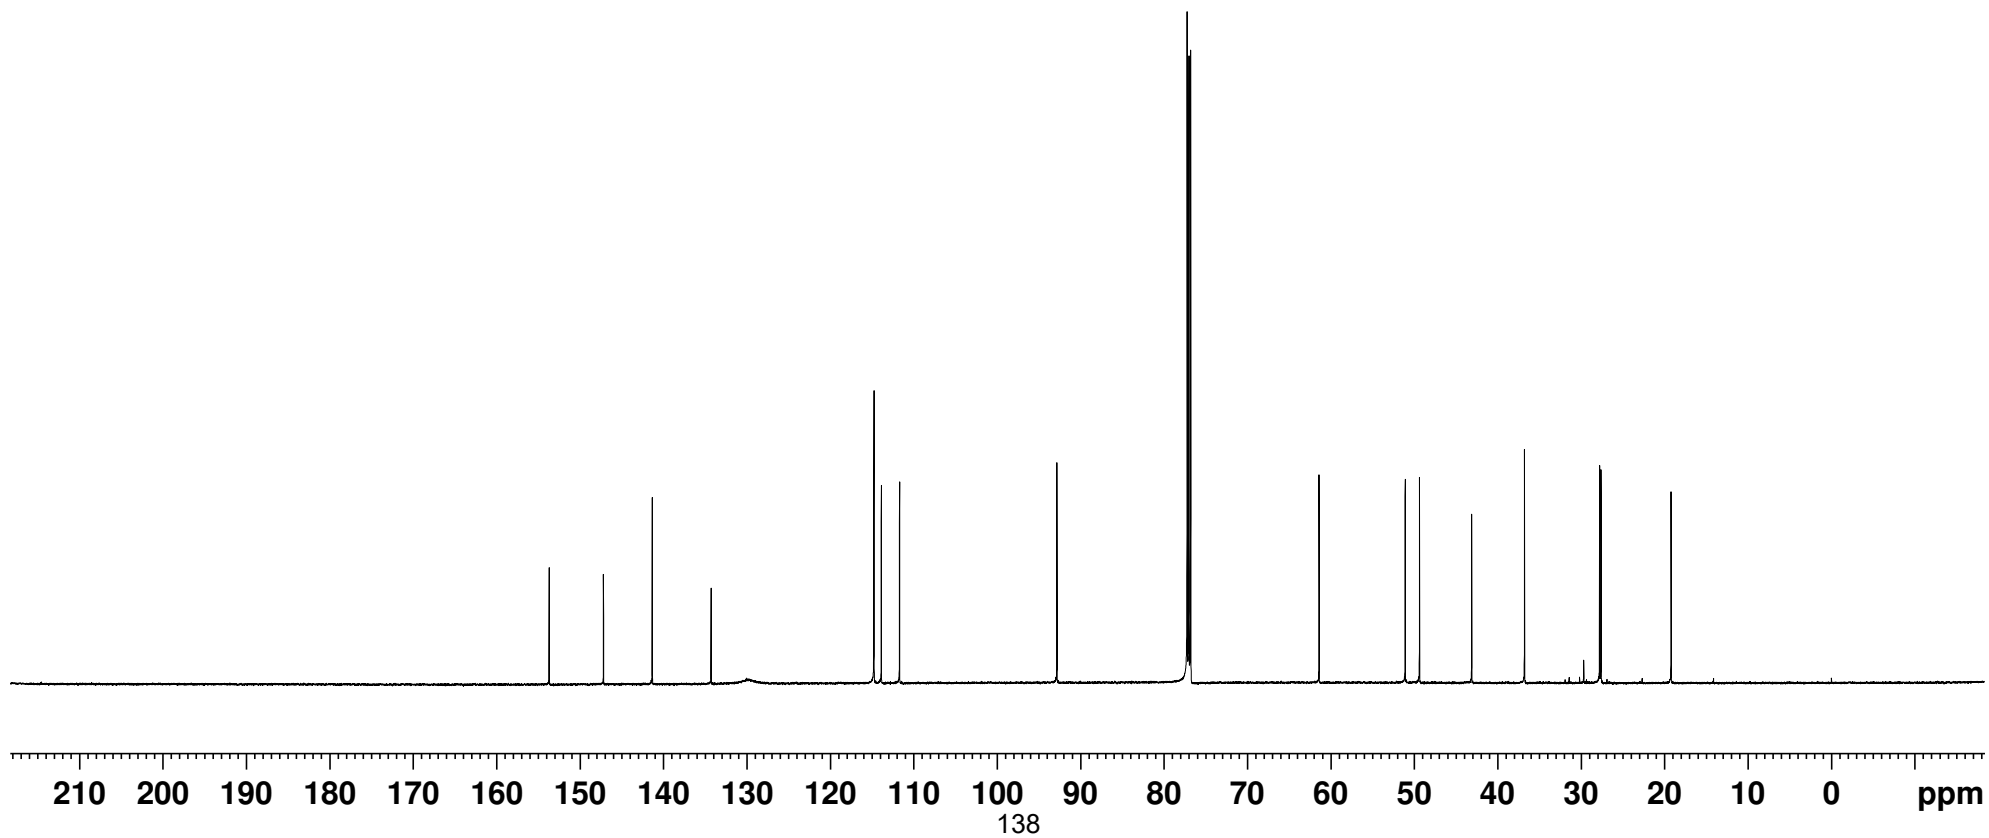

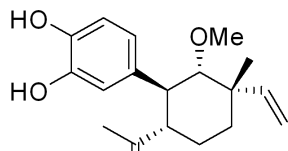

**proposed  
Corypsoriol I (1h)**

<sup>1</sup>H NMR (600 MHz, methanol-*d*<sub>4</sub>)

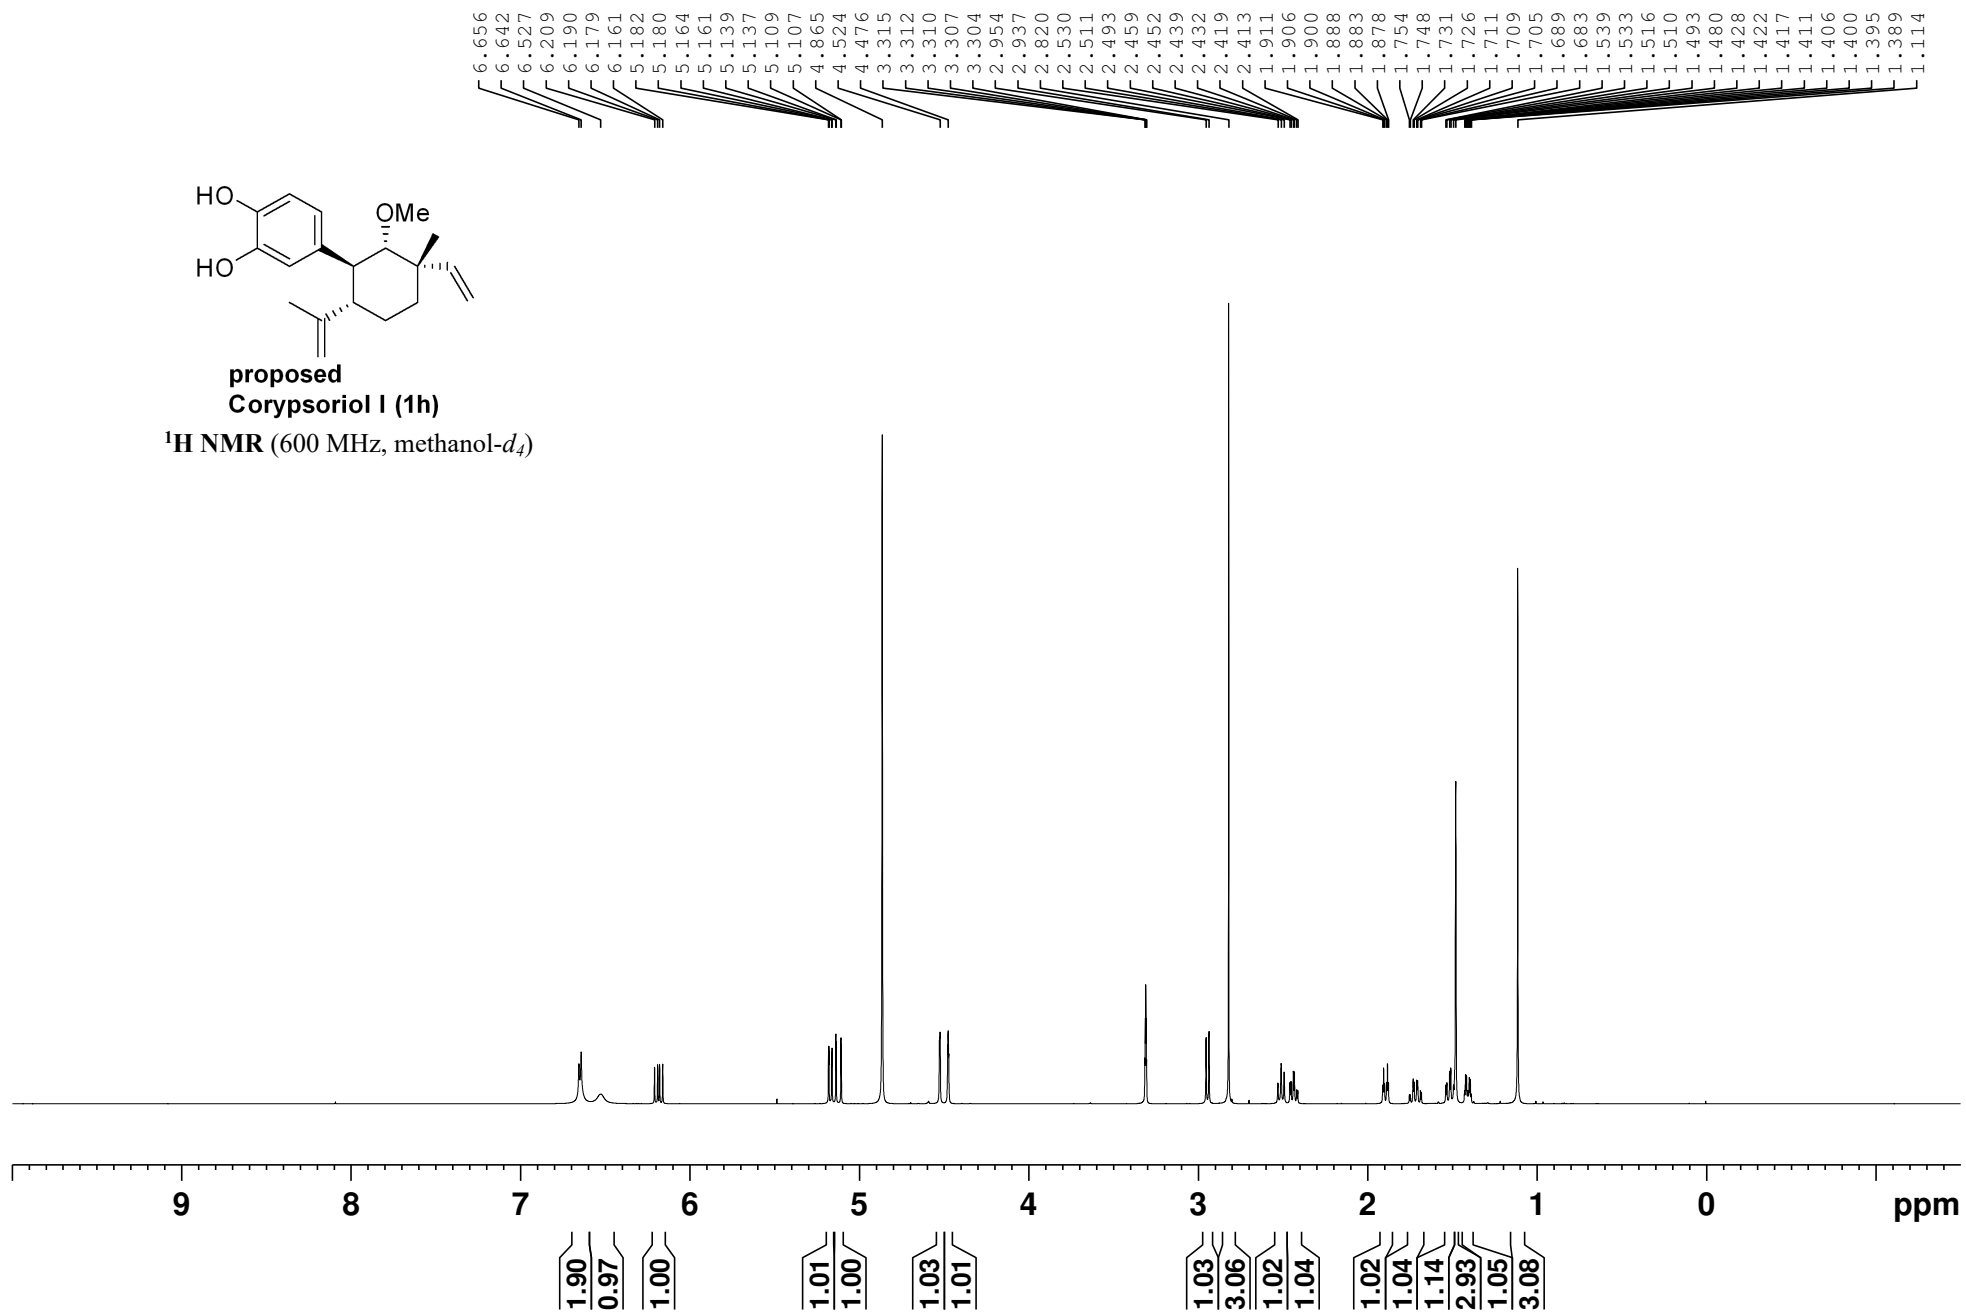

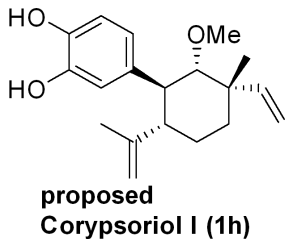

<sup>13</sup>C NMR (150 MHz, methanol-*d*<sub>4</sub>)

- 148.55
- 145.68
- 144.39
- 142.87
- 134.97
- 115.80
- 114.16
- 112.15
- 93.96
- 61.80
- 52.55
- 51.16
- 49.42
- 49.27
- 49.13
- 48.99
- 48.85
- 48.71
- 48.57
- 44.29
- 37.48
- 28.86
- 28.59
- 19.57

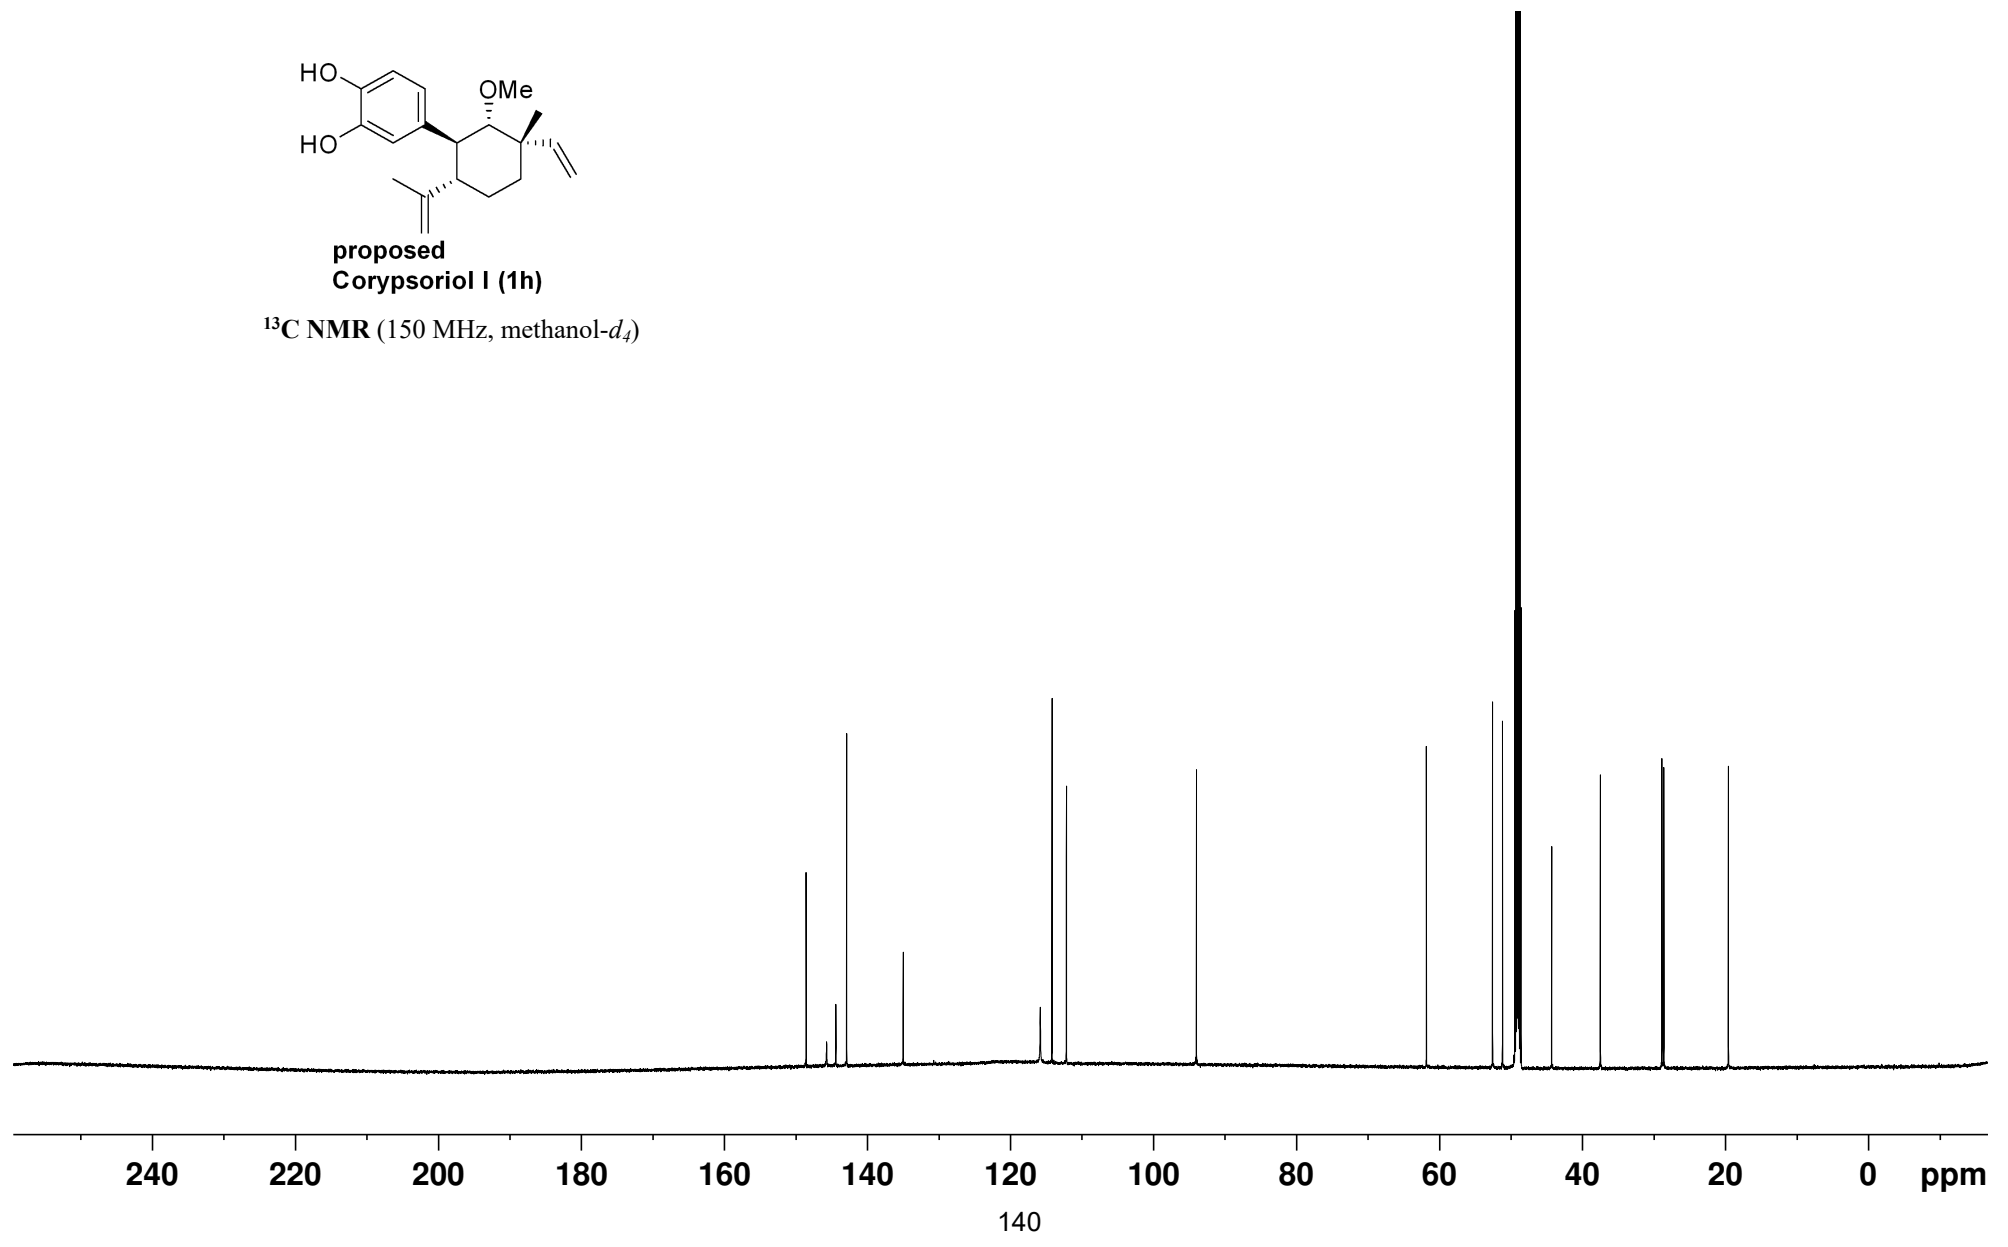



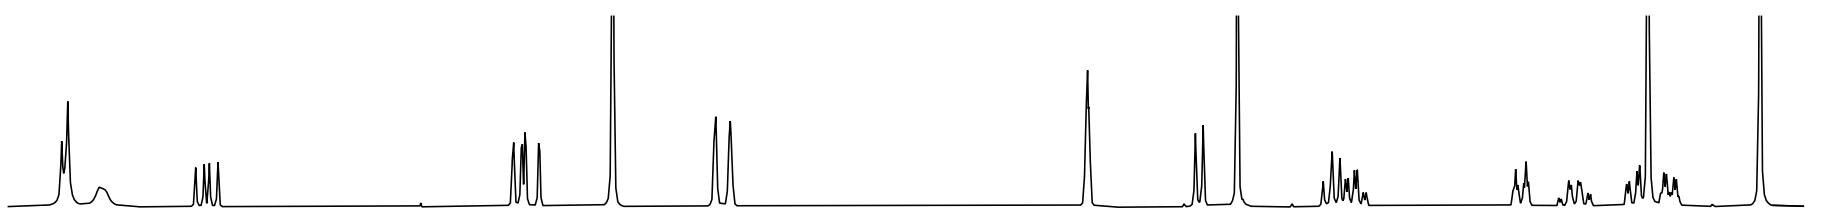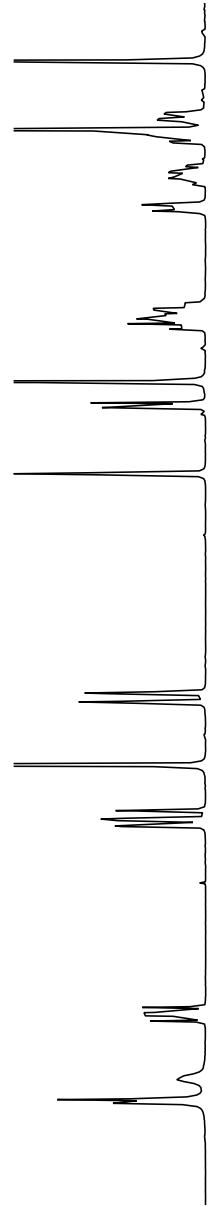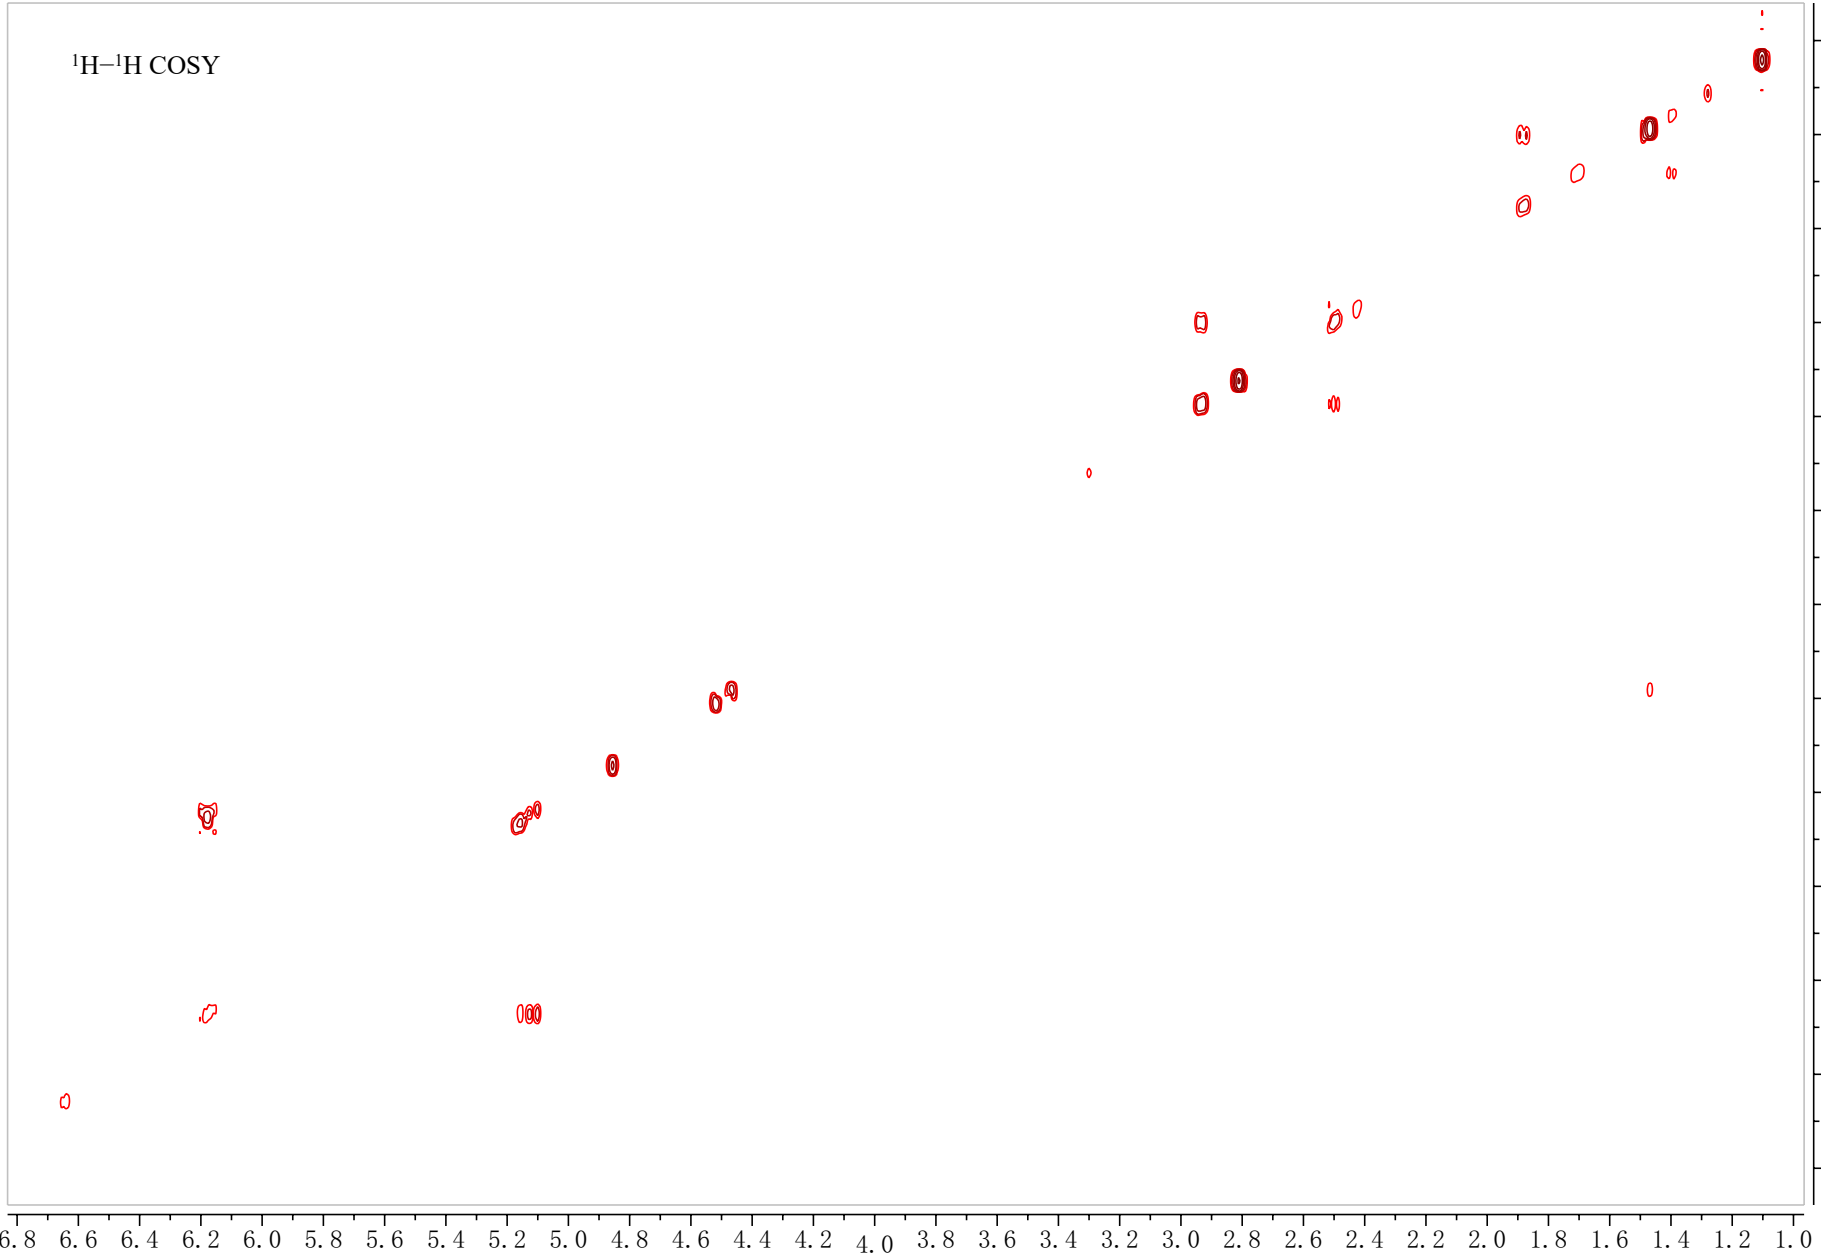

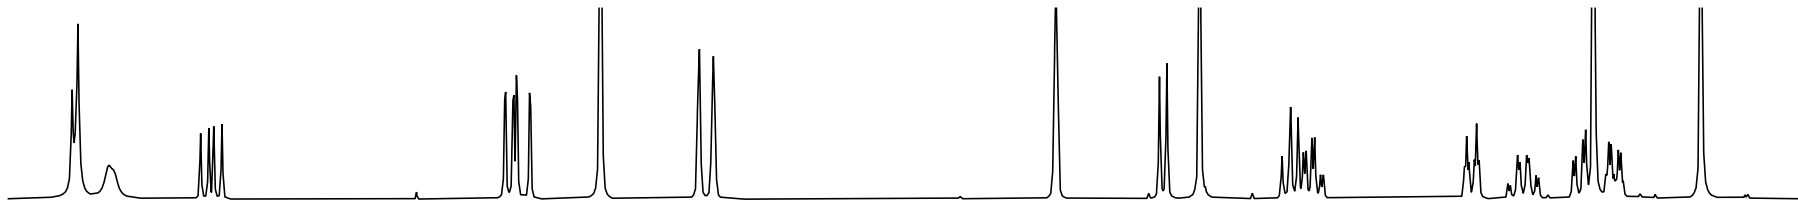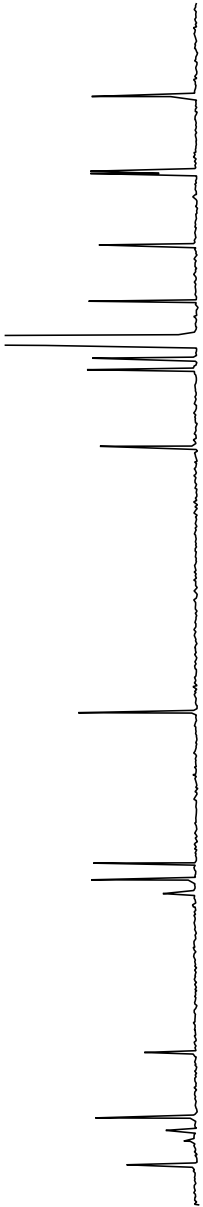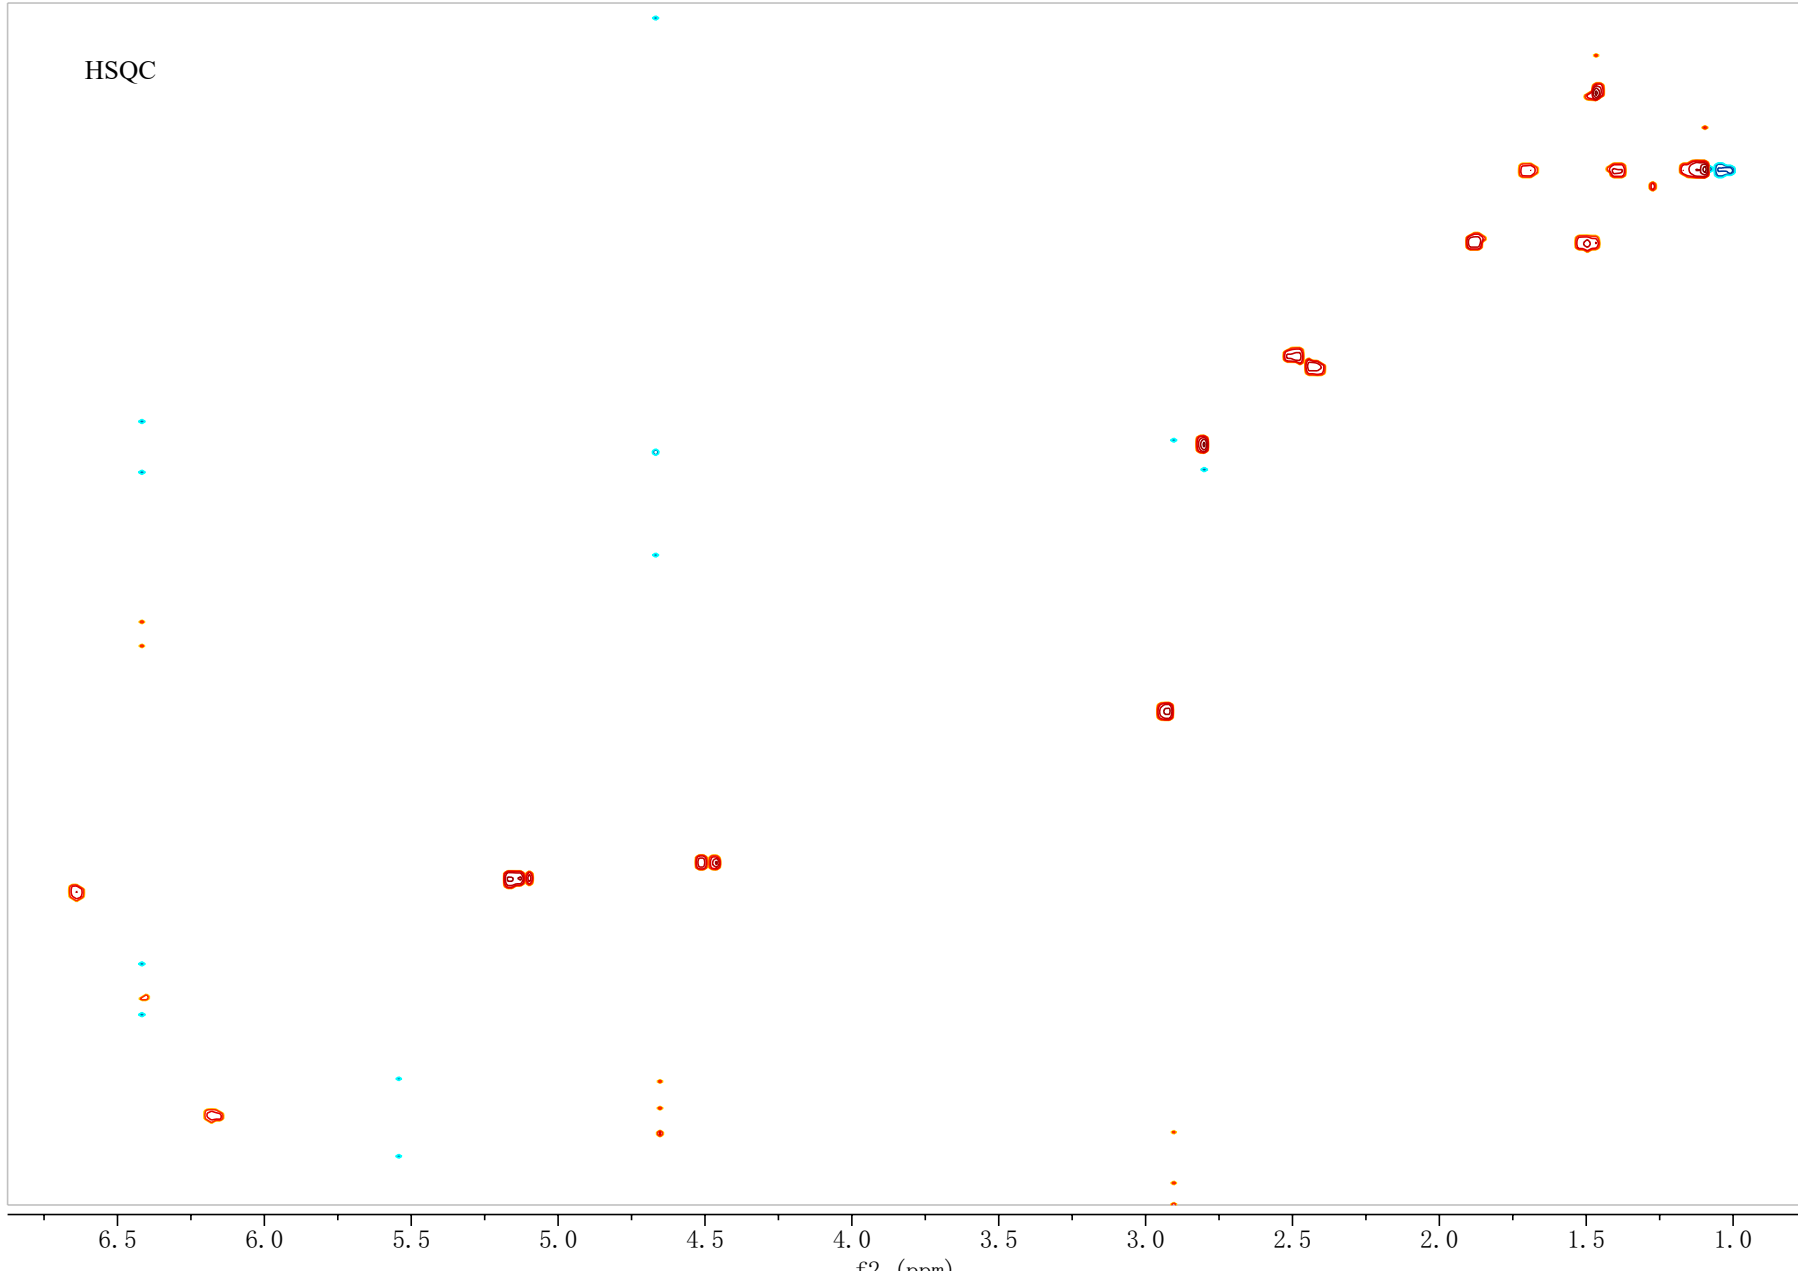

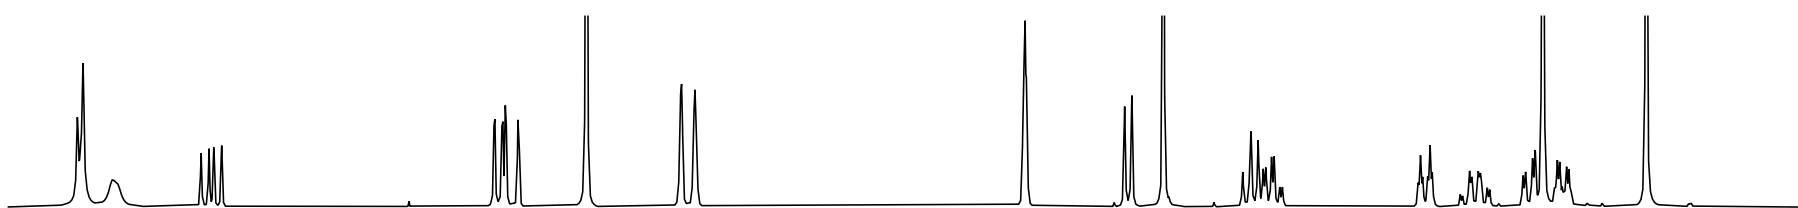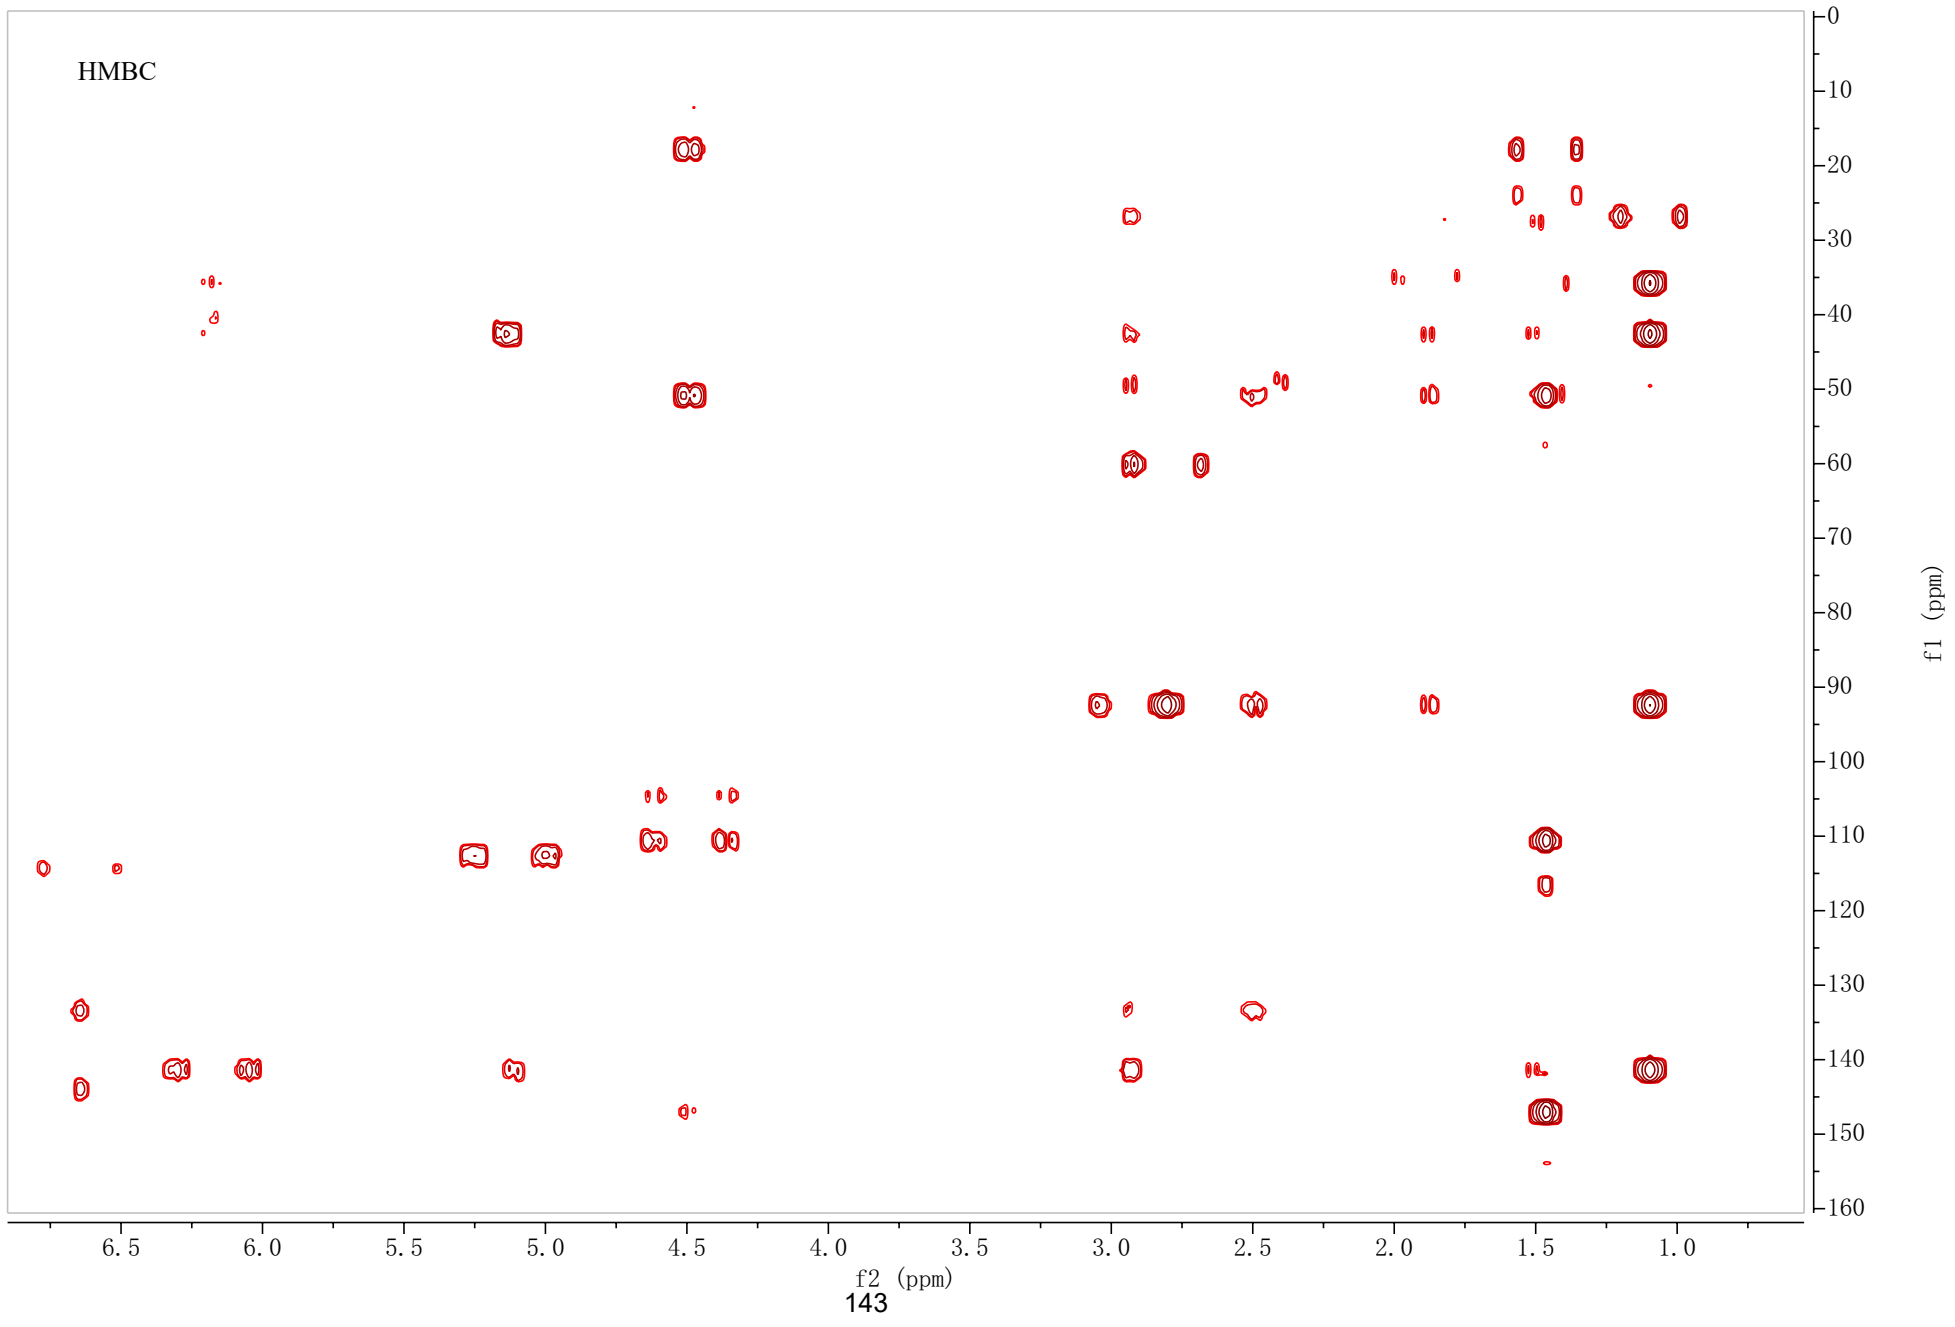

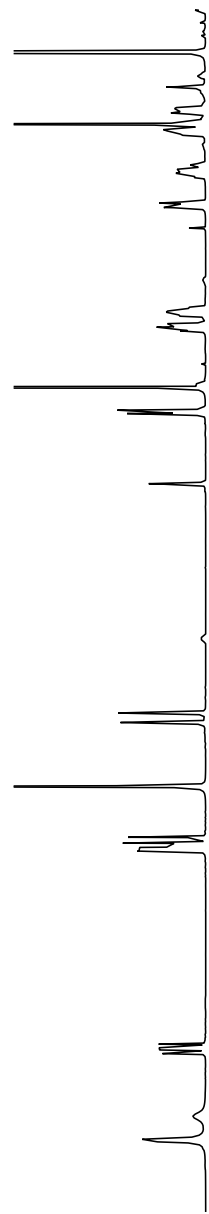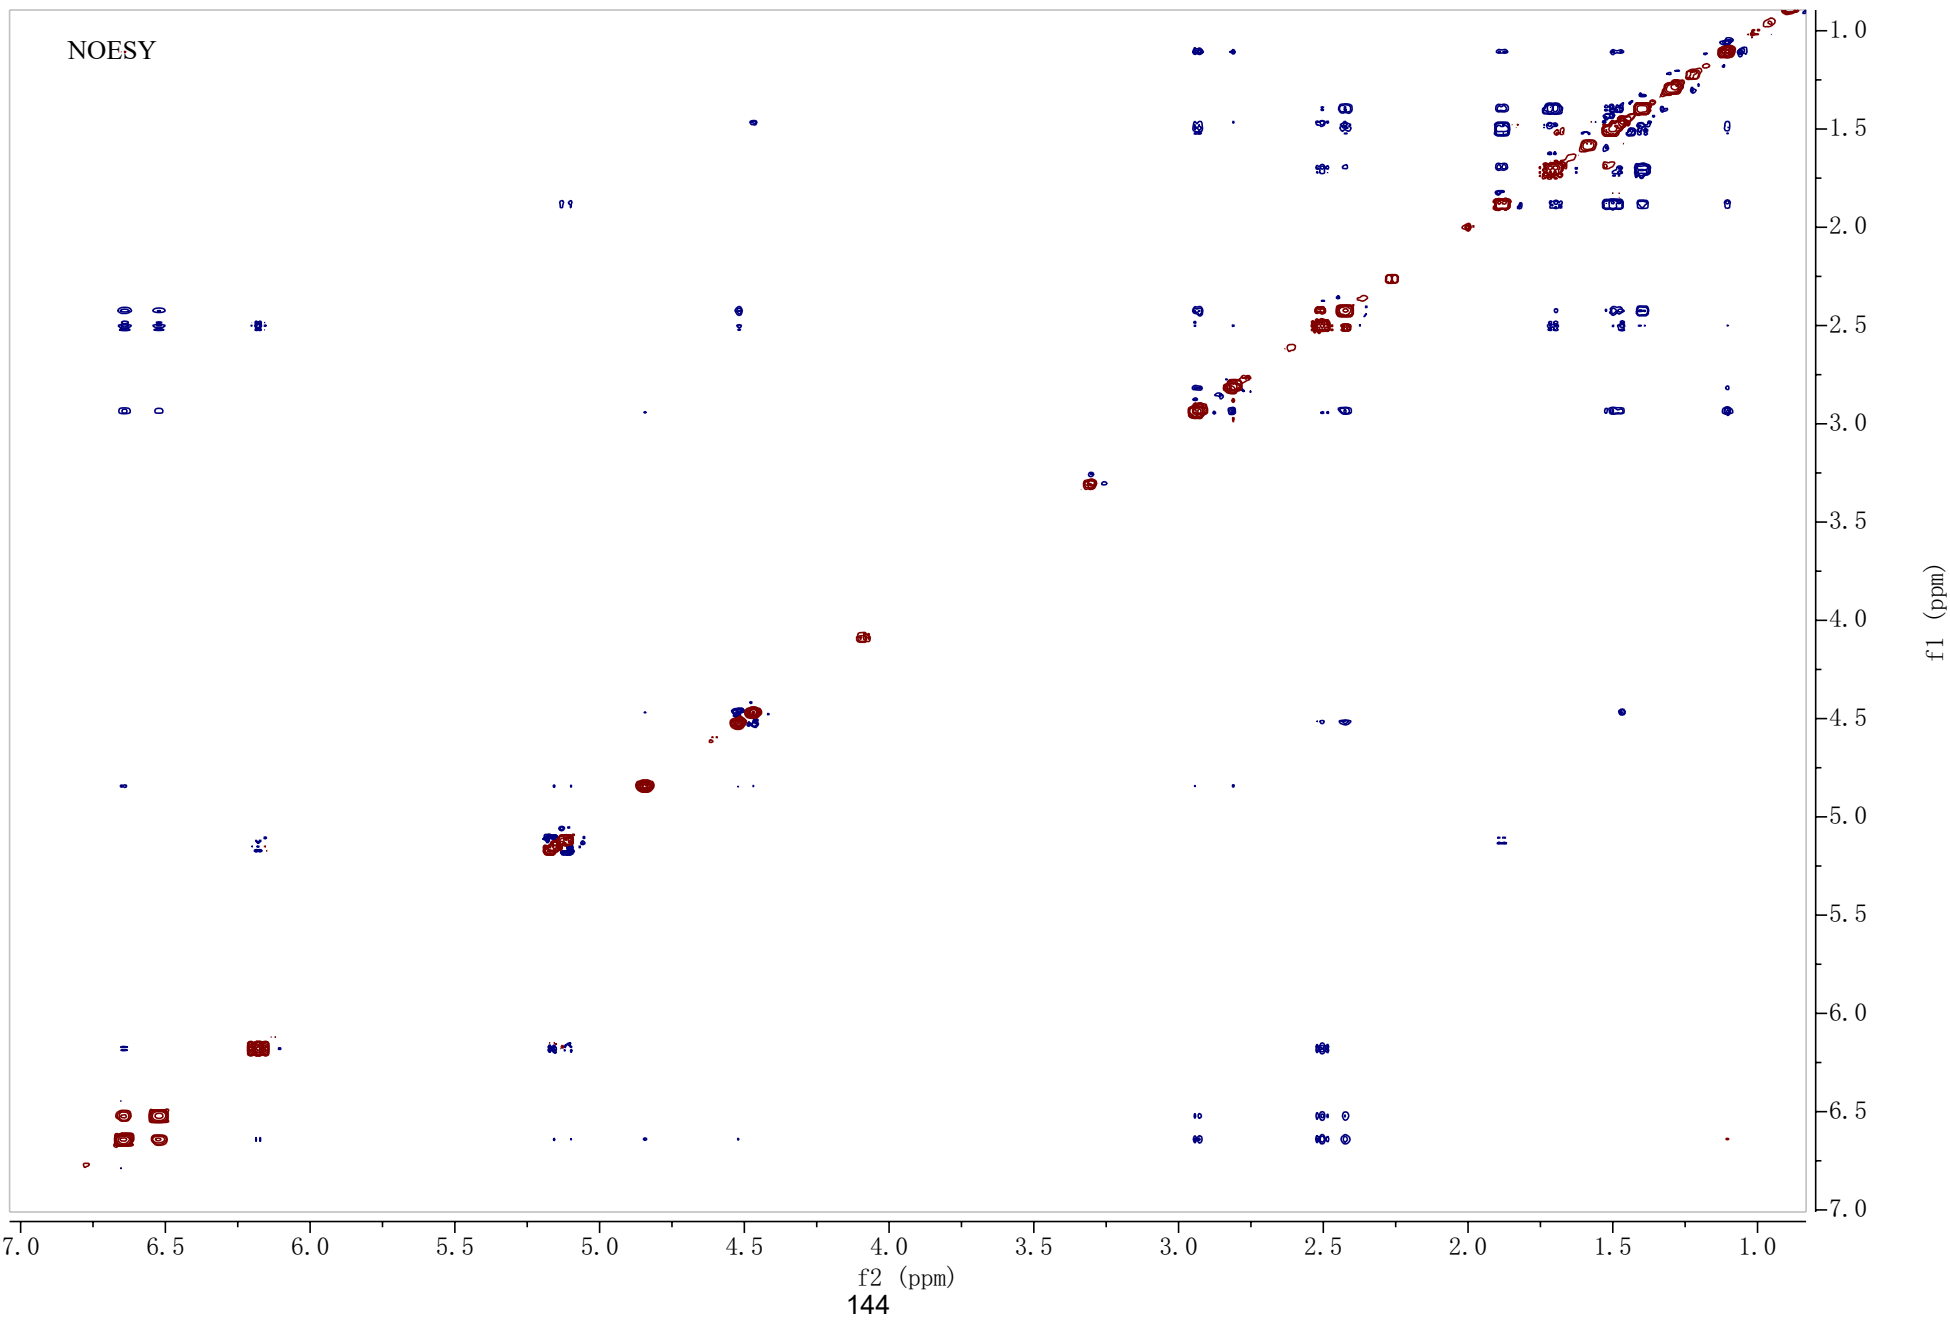

Supplement: d3sc00582h1.pdf [file d3sc00582h1.pdf]
